# Supplementary material for: Reduced synchroneity of intra-islet Ca2+ oscillations in vivo in Robo-deficient β cells
Source: eLife. 2021 Jul 7;10:e61308. doi: 10.7554/eLife.61308 (PMC8289414; doi:10.7554/eLife.61308)
Supplement: Figure 1—figure supplement 1—source data 1. [file elife-61308-fig1-figsupp1-data1.xlsx]

## Sheet: edgeR GLM gene
Ensembl	Symbol	sRobo-sCNTRL_logFC	sRobo-sCNTRL_logCPM	sRobo-sCNTRL_LR	sRobo-sCNTRL_PValue	sRobo-sCNTRL_FDR	sRobo-sCNTRL_Status	Description
ENSMUSG00000091383	Hist1h2al	8.60732	3.75146	107.933	2.77995e-25	3.84162e-21	UP	histone cluster 1, H2al
ENSMUSG00000058126	Tpm3-rs7	3.75816	4.17999	53.7904	2.23059e-13	1.54122e-09	UP
ENSMUSG00000000753	Serpinf1	-11.5587	2.04835	42.2563	8.006e-11	3.68783e-07	DOWN	Pigment epithelium-derived factor
ENSMUSG00000062611	Rps3a2	2.59585	4.4748	37.6409	8.50421e-10	2.93799e-06	UP	ribosomal protein S3A2
ENSMUSG00000050936	Gm42743	11.1431	1.63945	33.2111	8.26757e-09	2.28499e-05	UP	predicted gene 42743
ENSMUSG00000052516	Robo2	-1.7206	5.9742	31	2.58031e-08	5.94287e-05	DOWN	roundabout guidance receptor 2
ENSMUSG00000023886	Smoc2	-10.7955	1.29333	27.6615	1.44512e-07	0.000285288	DOWN	SPARC related modular calcium binding 2
ENSMUSG00000019850	Tnfaip3	2.15769	7.16045	26.7494	2.31618e-07	0.000381301	UP	tumor necrosis factor, alpha-induced protein 3
ENSMUSG00000024795	Kif20b	-10.699	1.19882	26.6148	2.48332e-07	0.000381301	DOWN	Kinesin-like protein KIF20B
ENSMUSG00000022883	Robo1	-1.80654	5.61124	26.0655	3.30023e-07	0.000414599	DOWN	roundabout guidance receptor 1
ENSMUSG00000054106	Try4	4.01902	7.41727	26.2103	3.06184e-07	0.000414599	UP	trypsin 4
ENSMUSG00000051378	Kif18b	-10.6072	1.10844	25.301	4.90457e-07	0.000564802	DOWN	Kinesin-like protein KIF18B
ENSMUSG00000067017	Gm3608	3.11098	3.43921	24.6928	6.72348e-07	0.000714706	UP	predicted gene 3608
ENSMUSG00000050953	Gja1	-10.5449	1.04707	24.2184	8.60079e-07	0.000848959	DOWN	gap junction protein, alpha 1
ENSMUSG00000058290	Espl1	-10.5248	1.02778	24.0361	9.4546e-07	0.000871021	DOWN	Mus musculus extra spindle pole bodies 1, separase (Espl1), transcript variant 2, mRNA.
ENSMUSG00000016918	Sulf1	-10.2494	0.756732	19.6883	9.11597e-06	0.00667055	DOWN	Extracellular sulfatase Sulf-1
ENSMUSG00000026655	Fam107b	1.24299	5.90967	19.9588	7.91269e-06	0.00667055	UP	Protein FAM107B
ENSMUSG00000031273	Col4a6	-10.317	0.82736	19.6767	9.17147e-06	0.00667055	DOWN	collagen, type IV, alpha 6
ENSMUSG00000091971	Hspa1a	-1.84215	5.2579	19.7156	8.98647e-06	0.00667055	DOWN	Heat shock 70 kDa protein 1A
ENSMUSG00000026628	Atf3	1.48419	5.62041	19.2731	1.13292e-05	0.00782791	UP	Cyclic AMP-dependent transcription factor ATF-3
ENSMUSG00000024989	Cep55	-10.0903	0.602132	18.2837	1.90331e-05	0.0125247	DOWN	Centrosomal protein of 55 kDa
ENSMUSG00000037892	Pcdh18	-10.1457	0.660454	17.981	2.23122e-05	0.0140151	DOWN	Protocadherin 18
ENSMUSG00000021763	BC067074	-10.0351	0.551478	17.5286	2.83017e-05	0.0170044	DOWN	cDNA sequence BC067074
ENSMUSG00000063954	Hist2h2aa2	-1.39166	5.10837	17.4123	3.00879e-05	0.0173244	DOWN	Histone H2A type 2-A
ENSMUSG00000021701	Plk2	1.32915	6.83638	17.2113	3.34443e-05	0.0177404	UP	Serine/threonine-protein kinase PLK2
ENSMUSG00000034640	Tiparp	1.24628	5.95461	17.1901	3.38187e-05	0.0177404	UP	TCDD-inducible poly(ADP-ribose) polymerase
ENSMUSG00000040046	Tph1	-10.0686	0.578724	17.1434	3.46618e-05	0.0177404	DOWN	tryptophan hydroxylase 1
ENSMUSG00000031137	Fgf13	-9.98935	0.503384	17.0508	3.63935e-05	0.0179615	DOWN	Mus musculus fibroblast growth factor 13 (Fgf13), transcript variant 4, mRNA.
ENSMUSG00000018604	Tbx3	-6.41417	1.48057	16.9	3.94017e-05	0.0187756	DOWN	T-box 3
ENSMUSG00000051235	Gen1	-9.90183	0.419729	16.769	4.22173e-05	0.0194467	DOWN	Flap endonuclease GEN homolog 1
ENSMUSG00000041828	Abca8a	-9.9774	0.496163	16.704	4.36885e-05	0.0194752	DOWN	ATP-binding cassette, sub-family A (ABC1), member 8a
ENSMUSG00000022799	Arhgap31	-9.89436	0.411127	16.5782	4.6685e-05	0.0201606	DOWN	Rho GTPase activating protein 31
ENSMUSG00000029859	Epha1	-9.86334	0.383863	16.4087	5.10507e-05	0.0205805	DOWN	Ephrin type-A receptor 1
ENSMUSG00000030786	Itgam	9.90388	0.429342	16.3692	5.21251e-05	0.0205805	UP	integrin alpha M
ENSMUSG00000062478	Ctrc	4.12497	6.81048	16.4442	5.01041e-05	0.0205805	UP	chymotrypsin-C
ENSMUSG00000030247	Kcnj8	-9.89823	0.41958	16.2552	5.53578e-05	0.0210504	DOWN	potassium inwardly-rectifying channel, subfamily J, member 8
ENSMUSG00000035934	Pknox2	-9.88854	0.410059	16.2211	5.63619e-05	0.0210504	DOWN	Homeobox protein PKNOX2
ENSMUSG00000045010	Gm4779	9.86808	0.39229	16.0119	6.29469e-05	0.0228911	UP
ENSMUSG00000027962	Vcam1	-9.90093	0.423095	15.8814	6.74394e-05	0.023896	DOWN	vascular cell adhesion molecule 1
ENSMUSG00000023067	Cdkn1a	1.41006	5.15853	15.8313	6.92488e-05	0.0239237	UP	Cyclin-dependent kinase inhibitor 1
ENSMUSG00000035109	Shc4	-9.78315	0.303925	15.7126	7.37328e-05	0.0242598	DOWN	SHC (Src homology 2 domain containing) family, member 4
ENSMUSG00000046743	Fat4	-9.83989	0.363304	15.7165	7.35813e-05	0.0242598	DOWN	Protocadherin Fat 4
ENSMUSG00000047517	Dmbt1	5.17329	8.23928	15.4975	8.26127e-05	0.0265494	UP	Mus musculus deleted in malignant brain tumors 1 (Dmbt1), transcript variant 1, mRNA.
ENSMUSG00000034488	Edil3	-9.72453	0.245557	15.0951	0.000102229	0.032107	DOWN	EGF-like repeat and discoidin I-like domain-containing protein 3
ENSMUSG00000039908	Slc26a11	-9.7016	0.228438	14.9575	0.000109961	0.0337678	DOWN	Sodium-independent sulfate anion transporter
ENSMUSG00000030717	Nupr1	3.88089	4.11261	14.8959	0.00011361	0.0341299	UP	Nuclear protein 1
ENSMUSG00000020573	Pik3cg	-9.65108	0.177834	14.7476	0.000122903	0.036013	DOWN	Phosphatidylinositol 4,5-bisphosphate 3-kinase catalytic subunit gamma isoform
ENSMUSG00000090877	Hspa1b	-1.24619	5.20869	14.7144	0.00012509	0.036013	DOWN	Heat shock 70 kDa protein 1B
ENSMUSG00000022103	Gfra2	-9.65638	0.185503	14.506	0.000139716	0.0394028	DOWN	GDNF family receptor alpha-2
ENSMUSG00000024186	Rgs11	-1.38553	4.88793	14.4606	0.000143124	0.0395566	DOWN	regulator of G-protein signaling 11
ENSMUSG00000054555	Adam12	-6.34457	1.5053	14.2892	0.000156763	0.0416597	DOWN	Disintegrin and metalloproteinase domain-containing protein 12
ENSMUSG00000084174	Sycn	4.04835	6.38662	14.2927	0.000156468	0.0416597	UP	Syncollin
ENSMUSG00000029135	Fosl2	1.91099	3.82452	13.8567	0.000197296	0.0514423	NS	Fos-related antigen 2
ENSMUSG00000022762	Ncam2	-9.51922	0.0473708	13.5325	0.000234463	0.0568429	NS	Neural cell adhesion molecule 2
ENSMUSG00000024395	Lims2	-9.52205	0.0562863	13.5396	0.000233578	0.0568429	NS	LIM and senescent cell antigen-like-containing domain protein 2
ENSMUSG00000027386	Fbln7	-7.70191	0.487651	13.545	0.000232907	0.0568429	NS	Fibulin-7
ENSMUSG00000028599	Tnfrsf1b	-9.54931	0.0832977	13.6021	0.000225939	0.0568429	NS	tumor necrosis factor receptor superfamily, member 1b
ENSMUSG00000040569	Slc26a7	9.5072	0.0467132	13.4643	0.000243147	0.0579318	NS	Anion exchange transporter
ENSMUSG00000027803	Wwtr1	-5.84895	1.32016	13.4295	0.000247698	0.058016	NS	WW domain containing transcription regulator 1
ENSMUSG00000031530	Dusp4	1.49481	4.5258	13.2473	0.000272974	0.0628704	NS	Dual specificity protein phosphatase 4
ENSMUSG00000049350	Zg16	2.99014	6.36155	13.1682	0.000284744	0.0634658	NS	zymogen granule protein 16
ENSMUSG00000056501	Cebpb	1.02464	5.96704	13.1874	0.000281834	0.0634658	NS	CCAAT/enhancer-binding protein beta
ENSMUSG00000032501	Trib1	1.15967	6.48171	13.0545	0.000302563	0.066367	NS	Tribbles homolog 1
ENSMUSG00000067276	Capn6	-9.41538	-0.0478931	12.9852	0.000313956	0.06779	NS	Calpain-6
ENSMUSG00000025091	Pnliprp2	3.87342	7.75815	12.8103	0.00034471	0.0732853	NS	pancreatic lipase-related protein 2
ENSMUSG00000030748	Il4ra	-2.50924	2.96695	12.7381	0.000358288	0.0750179	NS	Interleukin-4 receptor subunit alpha Soluble interleukin-4 receptor subunit alpha
ENSMUSG00000050824	Sstr5	-9.34798	-0.116314	12.6473	0.000376115	0.0775751	NS	Somatostatin receptor type 5
ENSMUSG00000047501	Cldn4	0.90978	6.03481	12.5191	0.000402819	0.0818611	NS	Claudin-4
ENSMUSG00000100862	Gm10925	-1.2074	7.68601	12.4152	0.000425851	0.0852874	NS	predicted gene 10925
ENSMUSG00000021070	Bdkrb2	-9.27062	-0.189522	12.2697	0.000460381	0.0908857	NS	B2 bradykinin receptor
ENSMUSG00000022246	Rai14	-9.24756	-0.207963	12.1633	0.000487383	0.093376	NS	Mus musculus retinoic acid induced 14 (Rai14), transcript variant 3, mRNA.
ENSMUSG00000026399	Cd55	-9.25256	-0.20692	12.1547	0.00048964	0.093376	NS	Complement decay-accelerating factor, GPI-anchored
ENSMUSG00000032268	Tmprss5	-9.26102	-0.193831	12.141	0.000493266	0.093376	NS	transmembrane protease, serine 5 (spinesin)
ENSMUSG00000049687	Fam109b	-7.49427	0.286667	12.0566	0.000516098	0.0963778	NS	Mus musculus family with sequence similarity 109, member B (Fam109b), transcript variant 1, mRNA.
ENSMUSG00000033365	Ipo13	-1.30244	4.58908	12.0068	0.000530054	0.0963792	NS	Importin-13
ENSMUSG00000047990	C2cd4a	1.50217	4.71079	12.0094	0.00052932	0.0963792	NS	C2 calcium-dependent domain containing 4A
ENSMUSG00000041431	Ccnb1	-2.4098	3.015	11.946	0.000547642	0.098284	NS	G2/mitotic-specific cyclin-B1
ENSMUSG00000031762	Mt2	1.42667	5.91776	11.8786	0.000567837	0.100602	NS	Metallothionein-2
ENSMUSG00000070690	5830473C10Rik	-9.17451	-0.279871	11.845	0.00057817	0.101136	NS	RIKEN cDNA 5830473C10 gene
ENSMUSG00000029334	Prkg2	2.15216	3.51706	11.7205	0.000618158	0.106779	NS	protein kinase, cGMP-dependent, type II
ENSMUSG00000018566	Slc2a4	-9.15806	-0.292211	11.6779	0.000632479	0.107904	NS	solute carrier family 2 (facilitated glucose transporter), member 4
ENSMUSG00000017607	Tns4	9.17414	-0.271225	11.6421	0.000644763	0.108658	NS	Tensin-4
ENSMUSG00000010660	Plcd1	-9.14668	-0.302912	11.5743	0.000668694	0.110008	NS	1-phosphatidylinositol 4,5-bisphosphate phosphodiesterase delta-1
ENSMUSG00000026358	Rgs1	4.13883	1.98396	11.58	0.000666655	0.110008	NS	regulator of G-protein signaling 1
ENSMUSG00000019960	Dusp6	1.17196	5.01272	11.4762	0.000704924	0.114604	NS	Dual specificity protein phosphatase 6
ENSMUSG00000026574	Dpt	-5.12749	2.09054	11.4056	0.000732232	0.11766	NS	Dermatopontin
ENSMUSG00000024184	Pdia2	3.74871	6.54325	11.3408	0.000758207	0.120433	NS	Protein disulfide-isomerase A2
ENSMUSG00000069041	Slc25a31	-9.08386	-0.367588	11.2681	0.000788505	0.123822	NS	solute carrier family 25 (mitochondrial carrier
ENSMUSG00000006345	Ggt1	5.23718	2.12705	11.2012	0.000817437	0.126923	NS	Glutathione hydrolase 1 proenzyme Glutathione hydrolase 1 heavy chain Glutathione hydrolase 1 light
ENSMUSG00000067608	Pcna-ps2	-3.60002	1.87889	11.1555	0.000837822	0.128643	NS
ENSMUSG00000025220	Mgea5	-0.900245	6.97597	11.1181	0.000854905	0.129823	NS	Protein O-GlcNAcase
ENSMUSG00000047139	Cd24a	1.02028	5.30612	11.085	0.000870281	0.130722	NS	Signal transducer CD24
ENSMUSG00000049112	Oxtr	1.71708	4.14646	11.0324	0.000895315	0.133036	NS	Oxytocin receptor
ENSMUSG00000022783	Spag6	-9.01762	-0.430652	10.8885	0.000967645	0.137855	NS	Sperm-associated antigen 6
ENSMUSG00000068341	Reg3d	3.46363	2.87605	10.9406	0.000940782	0.137855	NS	regenerating islet-derived 3 delta
ENSMUSG00000075224	Lrrc55	-9.02952	-0.413915	10.9031	0.000960059	0.137855	NS	Leucine-rich repeat-containing protein 55
ENSMUSG00000075553	Gm5464	-9.01762	-0.430652	10.894	0.000964784	0.137855	NS
ENSMUSG00000030219	Erp27	3.42262	4.45138	10.8377	0.000994541	0.139188	NS	Endoplasmic reticulum resident protein 27
ENSMUSG00000032515	Csrnp1	1.42302	5.76402	10.8009	0.00101448	0.139188	NS	Mus musculus cysteine-serine-rich nuclear protein 1 (Csrnp1), transcript variant 3, mRNA.
ENSMUSG00000036432	Siah2	0.8788	6.64591	10.7958	0.00101729	0.139188	NS	siah E3 ubiquitin protein ligase 2
ENSMUSG00000058258	Idi1	0.976598	6.02886	10.8019	0.00101394	0.139188	NS	isopentenyl-diphosphate delta isomerase 1
ENSMUSG00000024042	Sik1	1.72562	4.96777	10.7401	0.00104837	0.142034	NS	Serine/threonine-protein kinase SIK1
ENSMUSG00000005611	Mrvi1	-8.983	-0.460041	10.7162	0.00106203	0.142488	NS	Protein MRVI1
ENSMUSG00000033450	Tagap	4.40699	1.70499	10.6776	0.0010844	0.14409	NS	T-cell activation Rho GTPase-activating protein
ENSMUSG00000032115	Hyou1	1.17969	8.0466	10.6585	0.00109567	0.144201	NS	Hypoxia up-regulated protein 1
ENSMUSG00000015224	Cyp2j9	-8.95904	-0.482618	10.5858	0.00113957	0.148564	NS	cytochrome P450, family 2, subfamily j, polypeptide 9
ENSMUSG00000015340	Cybb	2.66701	2.51769	10.4727	0.0012115	0.156465	NS	Cytochrome b-245 heavy chain
ENSMUSG00000078122	F630028O10Rik	8.94683	-0.485957	10.3556	0.00129081	0.165164	NS
ENSMUSG00000029878	Dbpht2	0.937778	7.27674	10.2916	0.0013364	0.169428	NS
ENSMUSG00000032034	Kcnj5	4.6774	2.09433	10.2578	0.0013611	0.169643	NS	G protein-activated inward rectifier potassium channel 4
ENSMUSG00000036223	Ska1	-8.88678	-0.55211	10.2557	0.00136265	0.169643	NS	spindle and kinetochore associated complex subunit 1
ENSMUSG00000017721	Pigt	1.29267	4.71642	10.1932	0.0014096	0.172383	NS	GPI transamidase component PIG-T
ENSMUSG00000041633	Kctd12b	-0.839214	6.47358	10.209	0.00139759	0.172383	NS
ENSMUSG00000037887	Dusp8	1.23417	4.66915	10.1737	0.00142455	0.172683	NS	Dual specificity protein phosphatase 8
ENSMUSG00000028706	Nsun4	1.44876	4.08007	10.1311	0.00145785	0.173672	NS	5-methylcytosine rRNA methyltransferase NSUN4
ENSMUSG00000068457	Uty	-1.03407	5.13746	10.1378	0.00145259	0.173672	NS	ubiquitously transcribed tetratricopeptide repeat gene, Y chromosome
ENSMUSG00000027995	Tlr2	0.901943	5.83632	10.1099	0.00147478	0.174188	NS	toll-like receptor 2
ENSMUSG00000051242	Pcdhb9	-8.84514	-0.590941	10.0425	0.00152967	0.17914	NS	protocadherin beta 9
ENSMUSG00000024053	Emilin2	-8.84693	-0.58669	10.0265	0.00154305	0.179188	NS	Mus musculus elastin microfibril interfacer 2 (Emilin2), transcript variant 3, mRNA.
ENSMUSG00000037708	Spag6	8.83388	-0.589907	9.8702	0.00167977	0.19344	NS
ENSMUSG00000048087	Gm4737	2.69803	2.64774	9.83089	0.00171606	0.195985	NS	predicted gene 4737
ENSMUSG00000087050	Dhrs13os	-8.79189	-0.640877	9.80903	0.00173657	0.196702	NS
ENSMUSG00000040205	Cuzd1	3.4479	5.70903	9.73198	0.00181089	0.202979	NS	CUB and zona pellucida like domains 1
ENSMUSG00000041037	Irgq	-1.01709	5.23819	9.72138	0.00182137	0.202979	NS	Immunity-related GTPase family Q protein
ENSMUSG00000021186	Fbln5	-2.48176	3.29505	9.55222	0.00199708	0.220781	NS	Fibulin-5
ENSMUSG00000014846	Tppp3	0.941936	5.32076	9.45582	0.0021048	0.223741	NS	Tubulin polymerization-promoting protein family member 3
ENSMUSG00000021697	Depdc1b	-8.71691	-0.710354	9.46287	0.00209673	0.223741	NS	DEP domain-containing protein 1B
ENSMUSG00000030830	Itgal	4.83925	1.55943	9.47084	0.00208764	0.223741	NS	Integrin alpha-L
ENSMUSG00000031896	Ctrl	2.95001	8.80305	9.50428	0.00204994	0.223741	NS	chymotrypsin-like
ENSMUSG00000045287	Rtn4rl1	-0.831148	5.6588	9.49775	0.00205725	0.223741	NS	Reticulon-4 receptor-like 1
ENSMUSG00000056749	Nfil3	1.11498	5.51861	9.34326	0.00223807	0.236091	NS	Nuclear factor interleukin-3-regulated protein
ENSMUSG00000019577	Pdk4	0.872731	5.74569	9.32049	0.00226606	0.237232	NS	pyruvate dehydrogenase kinase, isoenzyme 4
ENSMUSG00000024503	Spink1	2.9286	4.59544	9.27236	0.00232638	0.238135	NS	serine peptidase inhibitor, Kazal type 1
ENSMUSG00000028351	Brinp1	-8.67455	-0.749949	9.28565	0.00230956	0.238135	NS	BMP/retinoic acid-inducible neural-specific protein 1
ENSMUSG00000031652	N4bp1	0.801264	5.70857	9.29063	0.00230329	0.238135	NS	NEDD4-binding protein 1
ENSMUSG00000032265	Fam46a	0.950056	6.97369	9.22956	0.00238139	0.238467	NS	family with sequence similarity 46 member A
ENSMUSG00000036931	Nfkbid	1.66427	3.94872	9.25616	0.00234705	0.238467	NS	NF-kappa-B inhibitor delta
ENSMUSG00000098905	Zfp953	-7.02711	-0.161945	9.2309	0.00237964	0.238467	NS	zinc finger protein 953
ENSMUSG00000033721	Vav3	-8.62856	-0.792569	9.09847	0.00255823	0.252515	NS	vav 3 oncogene
ENSMUSG00000047730	Fcgbp	-5.27449	3.54417	9.10735	0.00254585	0.252515	NS
ENSMUSG00000068115	Ninl	-6.95015	-0.238395	8.96465	0.00275253	0.269768	NS	Ninein-like protein
ENSMUSG00000035896	Rnase1	3.29485	9.08612	8.87943	0.00288402	0.280664	NS	ribonuclease, RNase A family, 1 (pancreatic)
ENSMUSG00000070822	Zscan18	2.45241	2.56933	8.84366	0.00294108	0.284216	NS	zinc finger and SCAN domain containing 18
ENSMUSG00000031919	Tmed6	1.59548	4.47886	8.80993	0.00299596	0.287508	NS	Transmembrane emp24 domain-containing protein 6
ENSMUSG00000023433	Cela3b	3.36783	8.9758	8.53092	0.00349164	0.329321	NS	Chymotrypsin-like elastase family member 3B
ENSMUSG00000048546	Tob2	0.924331	6.53202	8.52492	0.00350317	0.329321	NS	transducer of ERBB2, 2
ENSMUSG00000094103	1700047I17Rik2	1.26878	4.59782	8.53291	0.00348781	0.329321	NS	RIKEN cDNA 1700047I17 gene 2
ENSMUSG00000031765	Mt1	1.21886	7.75621	8.4743	0.00360199	0.336323	NS	Metallothionein-1
ENSMUSG00000017009	Sdc4	1.00344	5.23607	8.31685	0.00392791	0.351548	NS	syndecan 4
ENSMUSG00000027425	Kat14	-0.757735	5.97849	8.3214	0.00391808	0.351548	NS	lysine acetyltransferase 14
ENSMUSG00000047205	Dusp18	0.853943	6.20472	8.35844	0.00383899	0.351548	NS	Dual specificity protein phosphatase 18
ENSMUSG00000047777	Phf13	0.85953	6.11381	8.33094	0.00389755	0.351548	NS	PHD finger protein 13
ENSMUSG00000060548	Tnfrsf19	-4.70278	1.19993	8.30983	0.00394311	0.351548	NS	Tumor necrosis factor receptor superfamily member 19
ENSMUSG00000063903	Klk1	2.85182	6.55007	8.31478	0.00393237	0.351548	NS	Kallikrein-1
ENSMUSG00000071521	Try10	2.78068	6.52698	8.37605	0.00380198	0.351548	NS	trypsin 10
ENSMUSG00000026826	Nr4a2	1.284	4.64055	8.24964	0.00407601	0.360307	NS	Nuclear receptor subfamily 4 group A member 2
ENSMUSG00000045009	Prrt3	-2.19262	2.73246	8.24186	0.00409351	0.360307	NS	proline-rich transmembrane protein 3
ENSMUSG00000083079	Amy2b	3.06563	4.77459	8.21222	0.00416093	0.363923	NS	amylase 2b
ENSMUSG00000001627	Ifrd1	0.952241	6.31282	8.14902	0.00430845	0.373458	NS	Interferon-related developmental regulator 1
ENSMUSG00000003545	Fosb	1.33322	7.20565	8.14249	0.00432399	0.373458	NS	Protein fosB
ENSMUSG00000071265	1700086L19Rik	0.903719	7.61776	8.12094	0.0043757	0.375576	NS
ENSMUSG00000023885	Thbs2	-4.0173	3.87288	8.10848	0.00440587	0.375831	NS	Thrombospondin-2
ENSMUSG00000023031	Cela1	3.05805	9.06719	8.07813	0.00448027	0.376257	NS	Chymotrypsin-like elastase family member 1
ENSMUSG00000028967	Errfi1	0.94396	6.56699	8.07317	0.00449253	0.376257	NS	Mus musculus ERBB receptor feedback inhibitor 1 (Errfi1), transcript variant 1, mRNA.
ENSMUSG00000046709	Mapk10	-1.06858	4.94708	8.08132	0.00447238	0.376257	NS	mitogen-activated protein kinase 10 isoform 1x
ENSMUSG00000019987	Arg1	0.843527	5.40705	8.04257	0.00456908	0.378084	NS	Arginase-1
ENSMUSG00000054446	Cpa1	3.34272	9.56265	8.05066	0.00454871	0.378084	NS	Carboxypeptidase A1
ENSMUSG00000034765	Dusp5	1.1187	7.77248	8.00979	0.00465252	0.382698	NS	dual specificity phosphatase 5
ENSMUSG00000074268	Amy2	3.53037	11.4984	7.92808	0.00486734	0.397999	NS	Pancreatic alpha-amylase
ENSMUSG00000005148	Klf5	0.861073	6.05709	7.88758	0.00497754	0.404615	NS	Krueppel-like factor 5
ENSMUSG00000027875	Hmgcs2	2.08665	4.13739	7.8644	0.00504176	0.407439	NS	Hydroxymethylglutaryl-CoA synthase, mitochondrial
ENSMUSG00000023015	Racgap1	-1.01086	4.78343	7.81609	0.00517832	0.413637	NS	Rac GTPase-activating protein 1
ENSMUSG00000040584	Abcb1a	5.15009	0.703861	7.82399	0.00515573	0.413637	NS	Multidrug resistance protein 1A
ENSMUSG00000034139	Serpini2	3.04161	5.38246	7.78608	0.00526502	0.418146	NS	serine (or cysteine) peptidase inhibitor, clade I, member 2
ENSMUSG00000058979	Hdhd5	-1.06702	5.08534	7.73685	0.00541051	0.427245	NS	Haloacid dehalogenase-like hydrolase domain-containing 5
ENSMUSG00000029882	2210010C04Rik	2.90226	8.66234	7.59186	0.00586325	0.460365	NS	RIKEN cDNA 2210010C04 gene
ENSMUSG00000031558	Slit2	-2.93493	2.27916	7.58027	0.00590106	0.460716	NS	slit guidance ligand 2
ENSMUSG00000044037	Als2cl	-4.43196	0.713413	7.56961	0.00593605	0.460844	NS	ALS2 C-terminal like
ENSMUSG00000038894	Irs2	0.973671	7.04711	7.52552	0.00608311	0.469623	NS	Insulin receptor substrate 2
ENSMUSG00000025289	Prdx4	0.891314	5.14658	7.4957	0.00618465	0.472186	NS	peroxiredoxin 4
ENSMUSG00000027188	Pamr1	0.712433	6.18821	7.49678	0.00618093	0.472186	NS	Inactive serine protease PAMR1
ENSMUSG00000017418	Arl5b	1.27078	4.05253	7.42258	0.00644104	0.483933	NS	ADP ribosylation factor like GTPase 5B
ENSMUSG00000042029	Ncapg2	-1.56418	3.47786	7.42427	0.006435	0.483933	NS	non-SMC condensin II complex, subunit G2
ENSMUSG00000060938	Rpl26	0.91565	5.24183	7.42187	0.00644357	0.483933	NS	60S ribosomal protein L26
ENSMUSG00000021025	Nfkbia	1.56322	8.72483	7.40199	0.00651518	0.486666	NS	NF-kappa-B inhibitor alpha
ENSMUSG00000071553	Cpa2	3.05835	9.2244	7.36742	0.00664162	0.493444	NS	Carboxypeptidase A2
ENSMUSG00000059187	Fam19a1	-1.41979	3.76728	7.34219	0.00673548	0.497741	NS	Protein FAM19A1
ENSMUSG00000015312	Gadd45b	1.34131	6.09846	7.31627	0.00683332	0.502285	NS	Growth arrest and DNA damage-inducible protein GADD45 beta
ENSMUSG00000037795	N4bp2	1.18502	4.35235	7.25804	0.00705843	0.516087	NS	NEDD4 binding protein 2
ENSMUSG00000102742	Pcdhga11	-1.45806	3.68004	7.23971	0.00713084	0.518637	NS	protocadherin gamma subfamily A, 11
ENSMUSG00000053398	Phgdh	2.38942	3.76659	7.22026	0.00720852	0.521542	NS	D-3-phosphoglycerate dehydrogenase
ENSMUSG00000022176	Rem2	0.937859	5.80534	7.20115	0.0072857	0.524381	NS	RRAD and GEM like GTPase 2
ENSMUSG00000053519	Kcnip1	-0.838977	5.76487	7.18379	0.00735652	0.526734	NS	Kv channel-interacting protein 1
ENSMUSG00000059182	Skap2	-1.01251	4.70372	7.15324	0.00748286	0.533019	NS	Src kinase-associated phosphoprotein 2
ENSMUSG00000003153	Slc2a3	-4.90391	0.680277	7.1165	0.00763777	0.541263	NS	solute carrier family 2 (facilitated glucose transporter), member 3
ENSMUSG00000046962	Zbtb21	0.74771	5.50265	7.06196	0.00787379	0.555142	NS	zinc finger and BTB domain containing 21
ENSMUSG00000038102	Trappc11	-0.712374	6.70979	7.01548	0.0080808	0.564018	NS	Trafficking protein particle complex subunit 11
ENSMUSG00000048058	Ldlrad3	1.3539	3.76909	7.01537	0.00808131	0.564018	NS	low density lipoprotein receptor class A domain containing 3
ENSMUSG00000074657	Kif5a	-2.81156	2.17985	7.00517	0.00812748	0.56439	NS	Kinesin heavy chain isoform 5A
ENSMUSG00000032786	Alas1	-0.852359	5.74988	6.96343	0.00831922	0.574816	NS	5-aminolevulinate synthase, nonspecific, mitochondrial
ENSMUSG00000024401	Tnf	3.042	1.88852	6.94351	0.00841237	0.575556	NS	tumor necrosis factor
ENSMUSG00000089940	Gm4117	-6.52865	-0.633317	6.94333	0.00841322	0.575556	NS	predicted gene 4117
ENSMUSG00000071519	Prss3	2.92282	6.24054	6.92398	0.00850474	0.578951	NS
ENSMUSG00000095432	Zfp748	-1.2201	4.18919	6.89859	0.00862636	0.584351	NS	zinc finger protein 748
ENSMUSG00000021708	Rasgrf2	1.81303	2.95004	6.85079	0.00886022	0.586743	NS	ras-specific guanine nucleotide-releasing factor 2
ENSMUSG00000025408	Ddit3	0.999768	4.78004	6.86578	0.0087862	0.586743	NS	DNA damage-inducible transcript 3 protein
ENSMUSG00000028630	Dyrk2	0.678976	5.99646	6.84802	0.00887397	0.586743	NS	Dual specificity tyrosine-phosphorylation-regulated kinase 2
ENSMUSG00000048899	Rimkla	-1.89836	2.77993	6.85339	0.00884732	0.586743	NS	N-acetylaspartylglutamate synthase A
ENSMUSG00000071517	Gm10334	2.90075	4.56159	6.87965	0.00871826	0.586743	NS
ENSMUSG00000030691	Fchsd2	0.944183	4.7337	6.83299	0.00894894	0.588883	NS	F-BAR and double SH3 domains protein 2
ENSMUSG00000027463	Slc52a3	4.69812	0.770603	6.78218	0.00920723	0.603008	NS	Solute carrier family 52, riboflavin transporter, member 3
ENSMUSG00000019866	Crybg1	0.856722	5.34104	6.76981	0.00927129	0.60434	NS	crystallin beta-gamma domain containing 1
ENSMUSG00000005501	Usp40	-1.22802	4.13398	6.72736	0.0094945	0.610711	NS	ubiquitin specific peptidase 40
ENSMUSG00000018415	Gid4	-0.913781	5.31158	6.72602	0.00950162	0.610711	NS	Glucose-induced degradation
ENSMUSG00000059654	Reg1	2.96408	10.1197	6.73207	0.00946945	0.610711	NS	regenerating islet-derived 1
ENSMUSG00000023034	Nr4a1	1.95735	9.8376	6.6573	0.00987506	0.628864	NS	nuclear receptor subfamily 4, group A, member 1
ENSMUSG00000025743	Sdc3	-0.692898	5.85801	6.66227	0.00984751	0.628864	NS	syndecan 3
ENSMUSG00000020904	Cfap52	5.04945	0.0279347	6.63282	0.0100117	0.634639	NS	Cilia- and flagella-associated protein 52
ENSMUSG00000019846	Lama4	-2.31987	2.26352	6.60076	0.0101935	0.638212	NS	Laminin subunit alpha-4
ENSMUSG00000029999	Tgfa	-1.22865	4.60082	6.59848	0.0102066	0.638212	NS	transforming growth factor alpha
ENSMUSG00000064202	4430402I18Rik	-3.91151	0.731225	6.59972	0.0101995	0.638212	NS	RIKEN cDNA 4430402I18 gene
ENSMUSG00000037465	Klf10	1.04567	7.80265	6.5773	0.0103287	0.64294	NS	Mus musculus Kruppel-like factor 10 (Klf10), transcript variant 3, mRNA.
ENSMUSG00000004791	Pgf	0.951283	4.57661	6.55591	0.0104537	0.647798	NS	placental growth factor
ENSMUSG00000029730	Mcm7	-1.01328	4.69723	6.53835	0.0105573	0.6513	NS	minichromosome maintenance complex component 7
ENSMUSG00000024028	Tff2	2.45479	4.39446	6.48204	0.010897	0.651885	NS	trefoil factor 2 (spasmolytic protein 1)
ENSMUSG00000029385	Ccng2	-1.32167	3.72222	6.50968	0.0107289	0.651885	NS	Cyclin-G2
ENSMUSG00000032816	Igdcc4	-3.89243	1.25267	6.4864	0.0108703	0.651885	NS	Immunoglobulin superfamily DCC subclass member 4
ENSMUSG00000035206	Sppl2b	-1.11677	4.21988	6.50731	0.0107432	0.651885	NS	Signal peptide peptidase-like 2B
ENSMUSG00000058119	Gm5771	2.7283	6.952	6.50318	0.0107682	0.651885	NS
ENSMUSG00000073125	Xlr3b	1.23817	3.9054	6.49376	0.0108254	0.651885	NS	X-linked lymphocyte-regulated 3B
ENSMUSG00000078908	Mon1b	-0.993346	4.61725	6.52476	0.0106383	0.651885	NS	Vacuolar fusion B
ENSMUSG00000039046	Usp6nl	-0.959976	4.76298	6.44403	0.0111326	0.663108	NS	USP6 N-terminal like
ENSMUSG00000025993	Slc40a1	-0.801926	6.9594	6.41741	0.0113007	0.670234	NS	solute carrier family 40 (iron-regulated transporter), member 1
ENSMUSG00000038822	Hace1	-0.895936	4.78695	6.3777	0.0115563	0.676681	NS	E3 ubiquitin-protein ligase HACE1
ENSMUSG00000084329	Gm6733	2.00912	2.51173	6.39083	0.0114712	0.676681	NS	predicted gene 6733
ENSMUSG00000092570	Plut	-1.11054	4.20283	6.38332	0.0115198	0.676681	NS	PDX1 associated lncRNA, upregulator of transcription
ENSMUSG00000037573	Tob1	0.914313	7.6004	6.35524	0.0117035	0.682407	NS	Protein Tob1
ENSMUSG00000024225	Clps	3.0621	9.89592	6.32617	0.0118969	0.690772	NS	Colipase
ENSMUSG00000058135	Gstm1	0.753684	5.86546	6.31758	0.0119547	0.691219	NS	Glutathione S-transferase Mu 1
ENSMUSG00000037706	Cd81	0.75072	7.24399	6.30917	0.0120115	0.691613	NS	CD81 antigen
ENSMUSG00000062116	Zfp954	-1.20162	3.98012	6.30165	0.0120626	0.691672	NS	zinc finger protein 954
ENSMUSG00000028698	Pik3r3	-0.927613	4.77725	6.25442	0.0123884	0.707418	NS	Phosphatidylinositol 3-kinase regulatory subunit gamma
ENSMUSG00000028214	Gem	0.990379	7.86745	6.22486	0.0125969	0.716363	NS	GTP-binding protein GEM
ENSMUSG00000021775	Nr1d2	-0.759344	7.08469	6.2019	0.0127613	0.720746	NS	nuclear receptor subfamily 1, group D, member 2
ENSMUSG00000051678	Pcdhb6	3.35032	1.79781	6.19955	0.0127783	0.720746	NS	Protocadherin beta-6
ENSMUSG00000034463	Scara3	-2.32684	2.28739	6.16324	0.0130432	0.730857	NS	Scavenger receptor class A member 3
ENSMUSG00000050737	Ptges	-3.91146	1.52966	6.16052	0.0130633	0.730857	NS	Prostaglandin E synthase
ENSMUSG00000045464	2810002D19Rik	-4.83984	-0.0148365	6.14399	0.0131859	0.734743	NS	RIKEN cDNA 2810002D19 gene
ENSMUSG00000035840	Lysmd3	0.814125	5.38078	6.13409	0.01326	0.735901	NS	LysM and putative peptidoglycan-binding domain-containing protein 3
ENSMUSG00000006711	D130043K22Rik	-1.71121	3.73332	6.09006	0.0135944	0.745483	NS	Dyslexia-associated
ENSMUSG00000008999	Bmp7	2.91337	1.78115	6.09065	0.0135899	0.745483	NS	Bone morphotic protein 7
ENSMUSG00000078881	Gm14434	-4.15379	0.554409	6.10155	0.0135063	0.745483	NS
ENSMUSG00000063952	Brpf3	0.865706	4.787	6.0745	0.0137147	0.749106	NS	bromodomain and PHD finger containing, 3
ENSMUSG00000020399	Havcr2	4.77279	0.35181	6.04497	0.0139459	0.758736	NS	Hepatitis A virus cellular receptor 2 homolog
ENSMUSG00000026879	Gsn	-0.935535	5.58674	6.01055	0.0142206	0.763746	NS	gelsolin
ENSMUSG00000029661	Col1a2	-2.49208	7.32339	6.02443	0.0141092	0.763746	NS	Collagen alpha-2(I) chain
ENSMUSG00000031112	Stk26	-1.48713	3.62509	6.00578	0.0142591	0.763746	NS	serine/threonine kinase 26
ENSMUSG00000051486	Pcdhb11	-4.67069	0.461483	6.01077	0.0142188	0.763746	NS
ENSMUSG00000022744	Cldnd1	0.639927	5.72753	5.9582	0.014649	0.769712	NS	Claudin domain-containing protein 1
ENSMUSG00000024366	Gfra3	1.08601	4.14371	5.95925	0.0146403	0.769712	NS	GDNF family receptor alpha-3
ENSMUSG00000051517	Arhgef39	-4.60388	-0.000358459	5.97042	0.0145478	0.769712	NS	Rho guanine nucleotide exchange factor 39
ENSMUSG00000062751	Prss1	2.62201	6.37892	5.96373	0.0146031	0.769712	NS
ENSMUSG00000073600	Prob1	-3.54373	1.51782	5.97187	0.0145359	0.769712	NS	proline rich basic protein 1
ENSMUSG00000002996	Hbp1	-0.658274	6.95112	5.94077	0.0147946	0.774416	NS	HMG-box transcription factor 1
ENSMUSG00000026360	Rgs2	0.83908	5.42116	5.91064	0.0150497	0.7848	NS	Regulator of G-protein signaling 2
ENSMUSG00000034538	Zfp418	-5.05919	0.029859	5.88118	0.0153036	0.786172	NS	zinc finger protein 418
ENSMUSG00000037278	Tmem97	0.927174	5.51104	5.88515	0.0152691	0.786172	NS	Sigma intracellular receptor 2
ENSMUSG00000048120	Entpd1	2.59288	2.01381	5.89146	0.0152145	0.786172	NS	Ectonucleoside triphosphate diphosphohydrolase 1
ENSMUSG00000093930	Hmgcs1	0.754913	7.50424	5.90006	0.0151404	0.786172	NS	Hydroxymethylglutaryl-CoA synthase, cytoplasmic
ENSMUSG00000094410	Gm38394	-2.05539	2.49866	5.82363	0.0158123	0.809297	NS	predicted gene, 38394
ENSMUSG00000059195	Gm12715	0.76245	5.88803	5.81247	0.0159129	0.811443	NS	predicted gene 12715
ENSMUSG00000020330	Hmmr	-1.63611	2.95407	5.80389	0.0159908	0.812211	NS	Hyaluronan mediated motility receptor
ENSMUSG00000029193	Cckar	3.60606	4.66057	5.78504	0.0161631	0.812211	NS	Cholecystokinin receptor type A
ENSMUSG00000031659	Adcy7	-3.79268	1.66267	5.78637	0.0161509	0.812211	NS	Adenylate cyclase type 7
ENSMUSG00000055254	Ntrk2	-0.923366	4.93436	5.79158	0.0161031	0.812211	NS	BDNF/NT-3 growth factors receptor
ENSMUSG00000035356	Nfkbiz	1.05822	7.71011	5.74005	0.0165823	0.829058	NS	NF-kappa-B inhibitor zeta
ENSMUSG00000048612	Myof	-3.85683	1.21372	5.73624	0.0166184	0.829058	NS	Myoferlin
ENSMUSG00000109429	Gm45223	-4.54904	0.495248	5.71731	0.0167985	0.83503	NS	predicted gene 45223
ENSMUSG00000022414	Tab1	-0.874819	5.19661	5.69758	0.0169883	0.841439	NS	TGF-beta-activated kinase 1 and MAP3K7-binding protein 1
ENSMUSG00000035941	Ibtk	-0.615157	6.8582	5.6327	0.0176284	0.870025	NS	Inhibitor of Bruton tyrosine kinase
ENSMUSG00000030954	Gp2	2.99447	7.57099	5.62048	0.0177518	0.870255	NS	glycoprotein 2 (zymogen granule membrane)
ENSMUSG00000039878	Slc39a5	3.29671	1.68965	5.61977	0.017759	0.870255	NS	Zinc transporter ZIP5
ENSMUSG00000031292	Cdkl5	1.52189	3.25363	5.61261	0.0178317	0.870727	NS	Cyclin-dependent kinase-like 5
ENSMUSG00000071252	2210408I21Rik	-1.28601	3.67141	5.59739	0.0179873	0.875234	NS	Uncharacterized
ENSMUSG00000022602	Arc	1.36563	8.72636	5.58322	0.0181334	0.879246	NS	Activity-regulated cytoskeleton-associated protein
ENSMUSG00000036938	Try5	2.73967	8.8767	5.56943	0.0182768	0.8831	NS
ENSMUSG00000004151	Etv1	0.688585	5.55653	5.55363	0.0184424	0.885299	NS	ETS translocation variant 1
ENSMUSG00000035725	Prkx	0.906442	4.5256	5.55287	0.0184504	0.885299	NS	cAMP-dependent protein kinase catalytic subunit PRKX
ENSMUSG00000038119	Cdon	1.37373	3.59253	5.54429	0.0185411	0.886572	NS	Cell adhesion molecule-related/down-regulated by oncos
ENSMUSG00000011463	Cpb1	3.07593	10.6757	5.46229	0.0194312	0.889161	NS	carboxypeptidase B1 (tissue)
ENSMUSG00000024176	Sox8	5.21791	-0.357652	5.45251	0.0195402	0.889161	NS	SRY (sex determining region Y)-box 8
ENSMUSG00000024766	Lipo3	-1.45355	4.03064	5.4721	0.0193224	0.889161	NS
ENSMUSG00000025780	Itih5	-1.76255	2.96807	5.4991	0.0190263	0.889161	NS	Inter-alpha-trypsin inhibitor heavy chain H5
ENSMUSG00000026202	Tuba4a	0.731178	7.22701	5.49759	0.0190427	0.889161	NS	tubulin, alpha 4A
ENSMUSG00000028753	Vwa5b1	-1.149	3.98576	5.47659	0.0192729	0.889161	NS	von Willebrand factor A domain containing 5B1
ENSMUSG00000030302	Atp2b2	-0.854444	5.83081	5.44497	0.0196247	0.889161	NS	Plasma membrane calcium-transporting ATPase 2
ENSMUSG00000035842	Ddx11	-4.56534	0.254114	5.47769	0.0192607	0.889161	NS	Mus musculus DEAD/H (Asp-Glu-Ala-Asp/His) box helicase 11 (Ddx11), transcript variant 2, mRNA.
ENSMUSG00000036916	Zfp280c	1.49105	3.3822	5.46028	0.0194535	0.889161	NS	zinc finger protein 280C
ENSMUSG00000039686	Zer1	0.626322	5.85079	5.47918	0.0192443	0.889161	NS	zyg-11 related, cell cycle regulator
ENSMUSG00000051316	Taf7	0.733289	5.24242	5.44599	0.0196133	0.889161	NS	Transcription initiation factor TFIID subunit 7
ENSMUSG00000051331	Cacna1c	1.05961	4.08876	5.50215	0.0189931	0.889161	NS	Voltage-dependent L-type calcium channel subunit alpha-1C
ENSMUSG00000055491	Pprc1	-0.857913	4.725	5.44946	0.0195744	0.889161	NS	Mus musculus peroxisome proliferative activated receptor, gamma, coactivator-related 1 (Pprc1), tran
ENSMUSG00000057163	Prss2	3.16417	10.367	5.49302	0.0190925	0.889161	NS	protease, serine 2
ENSMUSG00000078684	5830417I10Rik	-0.845331	4.74544	5.47557	0.0192841	0.889161	NS	RIKEN cDNA 5830417I10 gene
ENSMUSG00000090625	Gm20721	0.617962	5.71097	5.44911	0.0195783	0.889161	NS
ENSMUSG00000031668	Eif2ak3	-0.61618	5.94246	5.43604	0.0197253	0.890798	NS	eukaryotic translation initiation factor 2 alpha kinase 3
ENSMUSG00000037306	Man1c1	0.630504	6.27197	5.42364	0.0198659	0.892276	NS	mannosidase alpha class 1C member 1
ENSMUSG00000057181	5730455P16Rik	-0.730302	5.25117	5.42177	0.0198872	0.892276	NS	Protein Njmu-R1
ENSMUSG00000058579	Cela2a	2.87751	10.6564	5.40356	0.0200958	0.898716	NS	Chymotrypsin-like elastase family member 2A
ENSMUSG00000025007	Aldh18a1	-0.607139	6.47789	5.39588	0.0201844	0.899766	NS	Delta-1-pyrroline-5-carboxylate synthase Glutamate 5-kinase Gamma-glutamyl phosphate reductase
ENSMUSG00000017007	Rbpjl	2.85538	2.09909	5.38326	0.0203308	0.901975	NS	recombination signal binding protein for immunoglobulin kappa J region-like
ENSMUSG00000022322	Shcbp1	-3.05794	1.66106	5.3768	0.0204063	0.901975	NS	SHC SH2 domain-binding protein 1
ENSMUSG00000025958	Creb1	-0.758246	5.07105	5.36923	0.020495	0.901975	NS	Cyclic AMP-responsive element-binding protein 1
ENSMUSG00000031957	Ctrb1	3.2052	10.8207	5.37431	0.0204354	0.901975	NS	Chymotrypsinogen B Chymotrypsin B chain A Chymotrypsin B chain B Chymotrypsin B chain C
ENSMUSG00000031314	Taf1	-0.604129	5.74333	5.35503	0.0206626	0.906466	NS	TATA-box binding protein associated factor 1
ENSMUSG00000021377	Dek	0.65327	5.55895	5.34196	0.020818	0.910393	NS	Protein DEK
ENSMUSG00000030095	Tmem43	0.649349	5.63453	5.33464	0.0209057	0.911342	NS	Transmembrane protein 43
ENSMUSG00000035722	Abca7	-0.594035	6.054	5.31106	0.0211905	0.920853	NS	ATP-binding cassette, sub-family A (ABC1), member 7
ENSMUSG00000020611	Gna13	0.630853	5.81799	5.26532	0.0217545	0.939453	NS	guanine nucleotide binding protein, alpha 13
ENSMUSG00000030386	Zfp606	-1.12954	4.34797	5.26809	0.0217198	0.939453	NS	zinc finger protein 606
ENSMUSG00000012443	Kif11	-1.77615	2.77328	5.24182	0.0220502	0.943378	NS	Kinesin-like protein KIF11
ENSMUSG00000021900	Btd	-1.49062	3.26035	5.24526	0.0220066	0.943378	NS	biotinidase
ENSMUSG00000048450	Msx1	3.43333	0.841905	5.24699	0.0219847	0.943378	NS	Homeobox protein MSX-1
ENSMUSG00000073530	Pappa2	0.664535	6.34922	5.2292	0.0222107	0.947314	NS	pappalysin 2
ENSMUSG00000004508	Gab2	-1.9133	3.37412	5.20668	0.0225003	0.956711	NS
ENSMUSG00000002930	Ppp1r17	3.10435	2.57559	5.152	0.0232196	0.96321	NS	Protein phosphatase 1 regulatory subunit 17
ENSMUSG00000003541	Ier3	1.06579	5.23106	5.17817	0.0228724	0.96321	NS	immediate early response 3
ENSMUSG00000020566	Atp6v1c2	4.58499	-0.368889	5.16515	0.0230444	0.96321	NS	ATPase, H+ transporting, lysosomal V1 subunit C2
ENSMUSG00000022026	Olfm4	-1.93864	2.62679	5.13194	0.0234895	0.96321	NS	Mus musculus olfactomedin 4 (Olfm4), mRNA.
ENSMUSG00000024235	Map3k8	1.66879	2.92153	5.14728	0.0232828	0.96321	NS	mitogen-activated protein kinase kinase kinase 8
ENSMUSG00000032578	Cish	0.812006	5.09845	5.14032	0.0233763	0.96321	NS	Cytokine-inducible SH2-containing protein
ENSMUSG00000033350	Chst2	2.23198	3.1605	5.14894	0.0232605	0.96321	NS	Carbohydrate sulfotransferase 2
ENSMUSG00000037447	Arid5a	1.52084	3.21357	5.14003	0.0233803	0.96321	NS	AT-rich interactive domain-containing protein 5A
ENSMUSG00000043621	Ubxn10	-0.577012	6.41395	5.13443	0.0234558	0.96321	NS	UBX domain protein 10
ENSMUSG00000052512	Nav2	-0.597379	6.18021	5.15411	0.0231915	0.96321	NS	neuron navigator 2
ENSMUSG00000070348	Ccnd1	0.856538	5.66351	5.18749	0.02275	0.96321	NS	G1/S-specific cyclin-D1
ENSMUSG00000089774	Slc5a3	1.82555	2.60123	5.16474	0.0230499	0.96321	NS	Sodium/myo-inositol cotransporter
ENSMUSG00000018899	Irf1	1.10459	7.75085	5.10498	0.0238572	0.973043	NS	interferon regulatory factor 1
ENSMUSG00000041729	Coro2b	-0.772002	5.08854	5.10404	0.0238702	0.973043	NS	Coronin-2B
ENSMUSG00000070284	Gmppb	-0.637081	6.00211	5.08222	0.0241725	0.982469	NS	GDP-mannose pyrophosphorylase B
ENSMUSG00000022364	Tbc1d31	-1.50519	3.18024	5.05383	0.0245715	0.993691	NS	TBC1 domain family member 31
ENSMUSG00000044734	Serpinb1a	1.34003	3.38057	5.05236	0.0245924	0.993691	NS	serine (or cysteine) peptidase inhibitor, clade B, member 1a
ENSMUSG00000025403	Shmt2	0.836769	4.61553	5.04356	0.0247177	0.99584	NS	serine hydroxymethyltransferase 2 (mitochondrial)
ENSMUSG00000000001	Gnai3	-0.223789	7.81939	0.443698	0.505343	0.999827	NS	guanine nucleotide binding protein (G protein), alpha inhibiting 3
ENSMUSG00000000028	Cdc45	-1.08868	3.01383	2.52324	0.11218	0.999827	NS	Cell division control
ENSMUSG00000000031	H19	-1.06416	-0.284568	0.280669	0.596263	0.999827	NS
ENSMUSG00000000056	Narf	0.257563	4.18017	0.247177	0.61907	0.999827	NS	Nuclear prelamin A recognition factor
ENSMUSG00000000058	Cav2	0.306994	2.19245	0.0993263	0.75264	0.999827	NS	Caveolin-2
ENSMUSG00000000078	Klf6	0.655177	5.59734	3.53033	0.0602559	0.999827	NS	Kruppel like factor 6
ENSMUSG00000000085	Scmh1	-0.297844	5.81007	1.22533	0.268317	0.999827	NS	Polycomb protein SCMH1
ENSMUSG00000000088	Cox5a	0.282391	5.35061	0.942337	0.331678	0.999827	NS	Cytochrome c oxidase subunit 5A, mitochondrial
ENSMUSG00000000093	Tbx2	-0.0891524	2.212	0.00355606	0.952448	0.999827	NS	T-box transcription factor TBX2
ENSMUSG00000000126	Wnt9a	-0.550011	-0.200343	0.0755686	0.783395	0.999827	NS	wingless-type MMTV integration site family, member 9A
ENSMUSG00000000127	Fer	-0.421953	4.77467	1.27742	0.25838	0.999827	NS	Tyrosine-protein kinase Fer
ENSMUSG00000000131	Xpo6	-0.151628	6.8124	0.343112	0.558038	0.999827	NS	exportin 6
ENSMUSG00000000134	Tfe3	0.42188	5.79868	2.24001	0.13448	0.999827	NS	Transcription factor E3
ENSMUSG00000000142	Axin2	-0.535746	0.694762	0.150769	0.697802	0.999827	NS	Axin-2
ENSMUSG00000000148	Brat1	-0.203942	4.57796	0.294412	0.587407	0.999827	NS	BRCA1-associated ATM activator 1
ENSMUSG00000000149	Gna12	-0.0939107	6.66471	0.135294	0.713005	0.999827	NS	guanine nucleotide binding protein, alpha 12
ENSMUSG00000000154	Slc22a18	1.49941	0.0623819	0.852525	0.355839	0.999827	NS	solute carrier family 22 (organic cation transporter), member 18
ENSMUSG00000000159	Igsf5	0.0787701	3.76228	0.0200344	0.887441	0.999827	NS
ENSMUSG00000000167	Pih1d2	0.0551986	2.68302	0.0056973	0.939832	0.999827	NS	PIH1 domain-containing protein 2
ENSMUSG00000000168	Dlat	-0.182024	6.07524	0.461718	0.496822	0.999827	NS	Dihydrolipoyllysine-residue acetyltransferase component of pyruvate dehydrogenase complex, mitochond
ENSMUSG00000000171	Sdhd	-0.0680503	7.15698	0.0609739	0.804963	0.999827	NS	succinate dehydrogenase complex, subunit D, integral membrane protein
ENSMUSG00000000184	Ccnd2	0.101593	9.7717	0.0253122	0.873592	0.999827	NS	G1/S-specific cyclin-D2
ENSMUSG00000000194	Gpr107	-0.507734	5.69907	3.77023	0.0521724	0.999827	NS	G protein-coupled receptor 107
ENSMUSG00000000197	Nalcn	-0.53	4.32906	1.40236	0.236329	0.999827	NS	sodium leak channel, non-selective
ENSMUSG00000000202	Btbd17	-0.373004	5.3454	1.3532	0.244719	0.999827	NS	BTB/POZ domain-containing protein 17
ENSMUSG00000000214	Th	0.200719	7.66815	0.345655	0.556583	0.999827	NS	tyrosine hydroxylase
ENSMUSG00000000215	Ins2	-0.151894	17.0103	0.00608365	0.93783	0.999827	NS	Insulin-2 Insulin-2 B chain Insulin-2 A chain
ENSMUSG00000000216	Scnn1g	-0.153913	3.77466	0.0935261	0.759741	0.999827	NS	Amiloride-sensitive sodium channel subunit gamma
ENSMUSG00000000253	Gmpr	0.0031615	7.95663	8.9471e-05	0.992453	0.999827	NS	guanosine monophosphate reductase
ENSMUSG00000000263	Glra1	0.0673565	-0.456173	0.0007755	0.977784	0.999827	NS	Glycine receptor subunit alpha-1
ENSMUSG00000000266	Mid2	-0.141869	4.56681	0.114881	0.734654	0.999827	NS	Mus musculus midline 2 (Mid2), transcript variant 2, mRNA.
ENSMUSG00000000275	Trim25	-0.105143	4.95579	0.0926403	0.760847	0.999827	NS	E3 ubiquitin/ISG15 ligase TRIM25
ENSMUSG00000000276	Dgke	0.575976	5.08041	2.42433	0.119465	0.999827	NS	Diacylglycerol kinase epsilon
ENSMUSG00000000278	Scpep1	0.0974305	7.29475	0.104304	0.746725	0.999827	NS	serine carboxypeptidase 1
ENSMUSG00000000282	Mnt	0.13559	2.70523	0.0317143	0.858656	0.999827	NS	Max-binding protein MNT
ENSMUSG00000000290	Itgb2	-0.377194	1.19279	0.0508473	0.821595	0.999827	NS
ENSMUSG00000000295	Hddc2	0.398885	3.17092	0.349105	0.55462	0.999827	NS	HD domain-containing protein 2
ENSMUSG00000000296	Tpd52l1	0.672769	2.89647	0.976126	0.323157	0.999827	NS	tumor protein D52-like 1
ENSMUSG00000000301	Pemt	-0.155757	1.98651	0.0266423	0.870342	0.999827	NS	Phosphatidylethanolamine N-methyltransferase
ENSMUSG00000000303	Cdh1	-0.23042	9.65271	0.137071	0.711211	0.999827	NS	cadherin 1
ENSMUSG00000000305	Cdh4	-0.472254	3.90897	0.843715	0.358336	0.999827	NS	Cadherin-4
ENSMUSG00000000308	Ckmt1	0.0796058	4.4473	0.0414983	0.838579	0.999827	NS	creatine kinase, mitochondrial 1, ubiquitous
ENSMUSG00000000317	Bcl6b	0.199187	4.2423	0.218429	0.64024	0.999827	NS	B-cell CLL/lymphoma 6 member B protein
ENSMUSG00000000325	Arvcf	-0.310726	5.0227	0.578968	0.446717	0.999827	NS	Armadillo repeat protein deleted in velo-cardio-facial syndrome homolog
ENSMUSG00000000326	Comt	-0.0748096	6.72707	0.0834305	0.772701	0.999827	NS	Catechol O-methyltransferase
ENSMUSG00000000339	Rtca	0.137075	4.64606	0.137217	0.711064	0.999827	NS	RNA 3'-terminal phosphate cyclase
ENSMUSG00000000340	Dbt	1.01874	3.75508	3.71963	0.0537762	0.999827	NS	Mus musculus dihydrolipoamide branched chain transacylase E2 (Dbt), transcript variant 2, mRNA.
ENSMUSG00000000346	Dazap2	-0.0914377	8.10188	0.0659667	0.797302	0.999827	NS	DAZ-associated protein 2
ENSMUSG00000000355	Mcts1	-0.114116	4.07548	0.0629615	0.801875	0.999827	NS	Malignant T-cell-amplified sequence 1
ENSMUSG00000000359	Rem1	0.359669	0.525455	0.0376551	0.846137	0.999827	NS	GTP-binding protein REM 1
ENSMUSG00000000374	Trappc10	-0.0675584	4.44842	0.0283835	0.86621	0.999827	NS
ENSMUSG00000000378	Ccm2	-0.514498	5.45782	3.4433	0.0635088	0.999827	NS	Cerebral cavernous malformations
ENSMUSG00000000384	Tbrg4	0.76045	3.86753	1.95965	0.161551	0.999827	NS	Protein TBRG4
ENSMUSG00000000385	Tmprss2	-0.472855	3.18388	0.534361	0.464779	0.999827	NS	Transmembrane protease serine 2 Transmembrane protease serine 2 non-catalytic chain Transmembrane pr
ENSMUSG00000000392	Fap	-0.116428	0.293411	0.00469836	0.945352	0.999827	NS	Prolyl endopeptidase FAP Antiplasmin-cleaving enzyme FAP, soluble form
ENSMUSG00000000394	Gcg	0.293704	14.2244	0.0399783	0.841523	0.999827	NS	Glucagon Glicentin Glicentin-related polypeptide Oxyntomodulin Glucagon Glucagon-like peptide 1 Gluc
ENSMUSG00000000399	Ndufa9	0.0695498	6.341	0.0746273	0.784715	0.999827	NS	NADH dehydrogenase [ubiquinone] 1 alpha subcomplex subunit 9, mitochondrial
ENSMUSG00000000409	Lck	-0.681374	0.831666	0.151346	0.697253	0.999827	NS	Proto-onco tyrosine-protein kinase LCK
ENSMUSG00000000416	Cttnbp2	-0.722632	4.50532	2.57155	0.108801	0.999827	NS	Cortactin-binding protein 2
ENSMUSG00000000420	Galnt1	-0.0565745	7.64195	0.0329866	0.855879	0.999827	NS	Polypeptide N-acetylgalactosaminyltransferase 1 Polypeptide N-acetylgalactosaminyltransferase 1 solu
ENSMUSG00000000439	Mkrn2	0.180879	5.75887	0.446074	0.504205	0.999827	NS	Probable E3 ubiquitin-protein ligase makorin-2
ENSMUSG00000000440	Pparg	-0.368613	2.65723	0.228365	0.632739	0.999827	NS	peroxisome proliferator activated receptor gamma
ENSMUSG00000000441	Raf1	-0.133859	6.02958	0.20882	0.647694	0.999827	NS	Mus musculus v-raf-leukemia viral onco 1 (Raf1), transcript variant 3, mRNA.
ENSMUSG00000000489	Pdgfb	0.308918	0.393625	0.0434367	0.834905	0.999827	NS	platelet derived growth factor, B polypeptide
ENSMUSG00000000530	Acvrl1	-0.136183	0.972999	0.00646756	0.935902	0.999827	NS	Serine/threonine-protein kinase receptor R3
ENSMUSG00000000531	Grasp	1.02486	2.81029	1.86347	0.172225	0.999827	NS	ral receptor for phosphoinositides 1-associated scaffold protein
ENSMUSG00000000532	Acvr1b	1.18472	1.53912	1.17639	0.278092	0.999827	NS	Activin receptor type-1B
ENSMUSG00000000538	Tom1l2	-0.154316	7.22346	0.28321	0.594605	0.999827	NS	TOM1-like protein 2
ENSMUSG00000000544	Gpa33	0.0489347	3.49924	0.00747216	0.931115	0.999827	NS	glycoprotein A33 (transmembrane)
ENSMUSG00000000552	Zfp385a	1.40942	-0.107932	0.719301	0.396373	0.999827	NS	zinc finger protein 385A
ENSMUSG00000000555	Itga5	0.356428	1.43484	0.100652	0.751049	0.999827	NS	Integrin alpha-5 Integrin alpha-5 heavy chain Integrin alpha-5 light chain
ENSMUSG00000000561	Wdr77	-0.144809	5.36552	0.231776	0.63021	0.999827	NS	WD repeat domain 77
ENSMUSG00000000563	Atp5f1	0.114557	7.28969	0.144641	0.70371	0.999827	NS	ATP synthase F(0) complex subunit B1, mitochondrial
ENSMUSG00000000567	Sox9	0.233756	1.98536	0.0527815	0.818292	0.999827	NS	Transcription factor SOX-9
ENSMUSG00000000568	Hnrnpd	-0.201469	6.55484	0.624095	0.42953	0.999827	NS	Heteroous nuclear ribonucleoprotein D0
ENSMUSG00000000579	Dynlt1c	-0.423837	3.11542	0.355354	0.551098	0.999827	NS	dynein light chain Tctex-type 1C
ENSMUSG00000000581	C1d	-0.135004	5.88307	0.25089	0.616449	0.999827	NS	Mus musculus C1D nuclear receptor co-repressor (C1d), transcript variant 2, mRNA.
ENSMUSG00000000594	Gm2a	0.298962	5.63922	1.09891	0.294504	0.999827	NS	Ganglioside GM2 activator
ENSMUSG00000000600	Krit1	-0.114252	5.61154	0.15129	0.697306	0.999827	NS	Krev interaction trapped protein 1
ENSMUSG00000000605	Clcn4	0.0401469	6.8591	0.0239853	0.876922	0.999827	NS	Mus musculus chloride channel, voltage-sensitive 4 (Clcn4), transcript variant 7, mRNA.
ENSMUSG00000000627	Sema4f	-2.76427	0.221162	2.04284	0.152924	0.999827	NS	Semaphorin-4F
ENSMUSG00000000631	Myo18a	0.242557	6.58703	0.783281	0.37614	0.999827	NS	myosin XVIIIA
ENSMUSG00000000632	Sez6	-0.716346	0.893821	0.300046	0.583853	0.999827	NS	Seizure protein 6
ENSMUSG00000000686	Abhd15	-0.222132	6.71759	0.613345	0.433531	0.999827	NS	abhydrolase domain containing 15
ENSMUSG00000000693	Loxl3	-1.67003	0.626501	1.11159	0.291736	0.999827	NS	Lysyl oxidase homolog 3
ENSMUSG00000000708	Kat2b	0.422253	4.85455	1.43417	0.231086	0.999827	NS	Histone acetyltransferase KAT2B
ENSMUSG00000000711	Rab5b	-0.081046	5.49371	0.0871931	0.767776	0.999827	NS	RAB5B, member RAS oncogene family
ENSMUSG00000000732	Icosl	0.636907	1.54866	0.330559	0.56533	0.999827	NS	icos ligand
ENSMUSG00000000738	Spg7	-0.193665	5.91626	0.493532	0.482356	0.999827	NS	Paraplegin
ENSMUSG00000000740	Rpl13	0.296405	7.50912	0.927396	0.33554	0.999827	NS	60S ribosomal protein L13
ENSMUSG00000000743	Chmp1a	0.080323	7.04659	0.0870261	0.767992	0.999827	NS	Charged multivesicular body protein 1a
ENSMUSG00000000751	Rpa1	-0.143214	6.8859	0.272677	0.601542	0.999827	NS	Replication protein A 70 kDa DNA-binding subunit
ENSMUSG00000000759	Tubgcp3	0.115571	5.32346	0.151078	0.697507	0.999827	NS	tubulin, gamma complex associated protein 3
ENSMUSG00000000776	Polr3d	0.0495787	4.84523	0.017549	0.89461	0.999827	NS	DNA-directed RNA polymerase III subunit RPC4
ENSMUSG00000000782	Tcf7	1.75336	1.72489	1.77719	0.182495	0.999827	NS	transcription factor 7, T cell specific
ENSMUSG00000000787	Ddx3x	0.203972	8.00228	0.353704	0.552024	0.999827	NS	ATP-dependent RNA helicase DDX3X
ENSMUSG00000000794	Kcnn3	-0.154452	2.96886	0.0522769	0.819148	0.999827	NS	Small conductance calcium-activated potassium channel protein 3
ENSMUSG00000000804	Usp32	-0.0934165	3.4695	0.0198942	0.887833	0.999827	NS	ubiquitin specific peptidase 32
ENSMUSG00000000811	Txnrd3	0.133812	3.81532	0.0728512	0.78723	0.999827	NS	thioredoxin reductase 3
ENSMUSG00000000823	Zfp512b	-0.0758636	6.07225	0.0829183	0.773381	0.999827	NS	zinc finger protein 512B
ENSMUSG00000000826	Dnajc5	-0.0711206	7.36317	0.0559718	0.81298	0.999827	NS	DnaJ homolog subfamily C member 5
ENSMUSG00000000827	Tpd52l2	-0.25629	5.80647	0.90852	0.340507	0.999827	NS	tumor protein D52-like 2
ENSMUSG00000000838	Fmr1	-0.146358	6.00135	0.303733	0.581552	0.999827	NS	fragile X mental retardation 1
ENSMUSG00000000861	Bcl11a	-1.86298	1.67009	2.35295	0.125046	0.999827	NS	B-cell lymphoma/leukemia 11A
ENSMUSG00000000876	Pxmp4	-0.227123	4.34976	0.300531	0.58355	0.999827	NS	Peroxisomal membrane protein 4
ENSMUSG00000000881	Dlg3	0.274866	5.60575	1.10829	0.292454	0.999827	NS	Disks large homolog 3
ENSMUSG00000000884	Gnb1l	-0.0331615	2.98075	0.00254687	0.959751	0.999827	NS	guanine nucleotide binding protein (G protein), beta polypeptide 1-like
ENSMUSG00000000901	Mmp11	-0.758705	0.10262	0.179384	0.671903	0.999827	NS	Stromelysin-3
ENSMUSG00000000902	Smarcb1	-0.0154645	5.7813	0.00320028	0.954887	0.999827	NS	SWI/SNF related, matrix associated, actin dependent regulator of chromatin, subfamily b, member 1
ENSMUSG00000000915	Hip1r	0.0380714	6.70472	0.020556	0.885995	0.999827	NS	Huntingtin-interacting protein 1-related protein
ENSMUSG00000000916	Nsun5	0.374154	3.25516	0.340365	0.559619	0.999827	NS	Probable 28S rRNA (cytosine-C(5))-methyltransferase
ENSMUSG00000000934	Top1mt	-0.347366	0.155399	0.0506665	0.821907	0.999827	NS	Mus musculus DNA topoisomerase 1, mitochondrial (Top1mt), transcript variant 2, mRNA.
ENSMUSG00000000957	Mmp14	-0.214334	4.32946	0.169104	0.680909	0.999827	NS	Matrix metalloproteinase-14
ENSMUSG00000000959	Oxa1l	0.22975	4.45231	0.335269	0.562573	0.999827	NS	Mitochondrial inner membrane protein OXA1L
ENSMUSG00000000976	Heatr6	-0.130198	4.43607	0.101173	0.750426	0.999827	NS	HEAT repeat-containing protein 6
ENSMUSG00000001016	Ilf2	-0.0828128	6.04745	0.0854374	0.77006	0.999827	NS	Interleukin enhancer-binding factor 2
ENSMUSG00000001017	Chtop	-0.052666	6.71766	0.0420586	0.837508	0.999827	NS	Chromatin target of PRMT1 protein
ENSMUSG00000001018	Snapin	0.0755532	4.97389	0.0489178	0.824957	0.999827	NS	SNARE-associated protein Snapin
ENSMUSG00000001020	S100a4	-0.33934	0.932801	0.0721556	0.788224	0.999827	NS	S100 calcium binding protein A4
ENSMUSG00000001025	S100a6	-0.0103235	2.30158	0.000149057	0.990259	0.999827	NS	S100 calcium binding protein A6 (calcyclin)
ENSMUSG00000001034	Mapk7	-0.400702	4.56969	1.00024	0.317253	0.999827	NS	Mitogen-activated protein kinase 7
ENSMUSG00000001036	Epn2	0.29745	5.24879	0.900894	0.342542	0.999827	NS	Epsin-2
ENSMUSG00000001039	B9d1	-0.331247	3.42368	0.325073	0.568575	0.999827	NS	B9 domain-containing protein 1
ENSMUSG00000001052	Sec24b	-0.0422646	6.18907	0.0267127	0.870172	0.999827	NS	Sec24 related gene family, member B (S. cerevisiae)
ENSMUSG00000001053	N4bp3	-0.181153	2.43371	0.0520233	0.819579	0.999827	NS	NEDD4-binding protein 3
ENSMUSG00000001054	Rmnd5b	0.0728062	5.55105	0.0675708	0.794907	0.999827	NS	B
ENSMUSG00000001056	Nhp2	-0.182879	2.96405	0.0764675	0.782143	0.999827	NS	H/ACA ribonucleoprotein complex subunit 2
ENSMUSG00000001062	Vps9d1	0.299271	4.66187	0.530371	0.466451	0.999827	NS	VPS9 domain containing 1
ENSMUSG00000001065	Zfp276	0.14751	3.64989	0.077391	0.780865	0.999827	NS	zinc finger protein (C2H2 type) 276
ENSMUSG00000001082	Mfsd10	-0.475231	4.9337	1.75628	0.18509	0.999827	NS	Mus musculus major facilitator superfamily domain containing 10 (Mfsd10), transcript variant 3, mRNA
ENSMUSG00000001089	Luzp1	0.100262	4.55417	0.0629657	0.801869	0.999827	NS	Leucine zipper protein 1
ENSMUSG00000001098	Kctd10	-0.141488	5.67829	0.26025	0.609948	0.999827	NS	potassium channel tetramerisation domain containing 10
ENSMUSG00000001100	Poldip2	-0.0095448	5.71459	0.00127847	0.971477	0.999827	NS	Polymerase delta-interacting protein 2
ENSMUSG00000001105	Ift20	-0.164527	5.95038	0.349615	0.554331	0.999827	NS	Intraflagellar transport
ENSMUSG00000001119	Col6a1	-1.69002	4.82118	1.63237	0.201376	0.999827	NS	Collagen alpha-1(VI) chain
ENSMUSG00000001120	Pcbp3	-0.0454485	6.58351	0.0293144	0.864055	0.999827	NS	Mus musculus poly(rC) binding protein 3 (Pcbp3), transcript variant 2, mRNA.
ENSMUSG00000001123	Lgals9	-0.0984759	1.7235	0.00849293	0.926573	0.999827	NS	Galectin-9
ENSMUSG00000001127	Araf	-0.207198	7.17061	0.51474	0.473094	0.999827	NS	Serine/threonine-protein kinase A-Raf
ENSMUSG00000001128	Cfp	0.315856	-0.419442	0.0204324	0.886336	0.999827	NS	complement factor properdin
ENSMUSG00000001134	Uxt	-0.427174	3.40072	0.564773	0.452343	0.999827	NS	ubiquitously expressed transcript
ENSMUSG00000001138	Cnnm3	-0.496447	4.17223	1.06423	0.302253	0.999827	NS	Mus musculus cyclin M3 (Cnnm3), transcript variant 3, mRNA.
ENSMUSG00000001143	Lman2l	-0.0678443	5.08179	0.0319701	0.858093	0.999827	NS	VIP36-like protein
ENSMUSG00000001150	Mcm3ap	-0.0485581	5.51958	0.00932464	0.923073	0.999827	NS	minichromosome maintenance complex component 3 associated protein
ENSMUSG00000001151	Pcnt	-0.401626	4.37187	0.62926	0.427627	0.999827	NS	pericentrin
ENSMUSG00000001156	Mxd1	0.0974608	5.95646	0.131368	0.717017	0.999827	NS	MAX dimerization protein 1
ENSMUSG00000001157	Gmcl1	-0.192453	5.11773	0.343758	0.557668	0.999827	NS	germ cell-less, spermatogenesis associated 1
ENSMUSG00000001158	Snrnp27	0.206189	4.8257	0.354708	0.55146	0.999827	NS	U4/U6.U5 small nuclear ribonucleoprotein 27 kDa protein
ENSMUSG00000001166	Oas1c	-0.762559	1.38117	0.447597	0.503478	0.999827	NS	Inactive 2'-5' oligoadenylate synthetase 1C
ENSMUSG00000001173	Ocrl	-0.387892	6.37994	1.72356	0.189236	0.999827	NS	Inositol polyphosphate 5-phosphatase OCRL-1
ENSMUSG00000001175	Calm1	0.208042	10.0104	0.0923938	0.761156	0.999827	NS	Calmodulin-1
ENSMUSG00000001211	Agpat3	-0.0802469	6.59142	0.0960591	0.756611	0.999827	NS	1-acyl-sn-glycerol-3-phosphate acyltransferase gamma
ENSMUSG00000001227	Sema6b	0.873227	1.35469	0.465045	0.495276	0.999827	NS	sema domain, transmembrane domain (TM), and cytoplasmic domain, (semaphorin) 6B
ENSMUSG00000001228	Uhrf1	-0.456936	3.34512	0.541339	0.461878	0.999827	NS	ubiquitin-like, containing PHD and RING finger domains, 1
ENSMUSG00000001229	Dpp9	0.0667655	6.8795	0.0637375	0.800683	0.999827	NS	Dipeptidyl peptidase 9
ENSMUSG00000001240	Ramp2	0.781789	3.31629	1.68615	0.19411	0.999827	NS	Receptor activity-modifying protein 2
ENSMUSG00000001247	Lsr	0.383093	6.9392	1.8726	0.171178	0.999827	NS	Lipolysis-stimulated lipoprotein receptor
ENSMUSG00000001248	Gramd1a	0.131023	6.86228	0.249218	0.617626	0.999827	NS	GRAM domain-containing protein 1A
ENSMUSG00000001249	Hpn	1.26918	1.85651	1.52754	0.216482	0.999827	NS	Serine protease hepsin Serine protease hepsin non-catalytic chain Serine protease hepsin catalytic c
ENSMUSG00000001270	Ckb	0.279855	5.67763	1.11628	0.290721	0.999827	NS	Creatine kinase B-type
ENSMUSG00000001280	Sp1	0.143079	3.82033	0.0838919	0.772091	0.999827	NS	Transcription factor Sp1
ENSMUSG00000001281	Itgb7	1.00992	0.82705	0.309393	0.578053	0.999827	NS	Integrin beta-7
ENSMUSG00000001285	Myg1	-0.10909	4.54118	0.0815438	0.775216	0.999827	NS	UPF0160 protein MYG1, mitochondrial
ENSMUSG00000001288	Rarg	-0.429566	1.35324	0.147466	0.700969	0.999827	NS	Retinoic acid receptor gamma
ENSMUSG00000001289	Pfdn5	0.128417	5.27848	0.175157	0.675569	0.999827	NS	Prefoldin subunit 5
ENSMUSG00000001300	Efnb2	0.651667	1.49528	0.354266	0.551708	0.999827	NS	Ephrin-B2
ENSMUSG00000001305	Rrp15	0.355854	3.87412	0.48279	0.487161	0.999827	NS	RRP15-like protein
ENSMUSG00000001313	Rnd2	0.626005	1.94039	0.4292	0.512382	0.999827	NS	Rho family GTPase 2
ENSMUSG00000001323	Srr	0.0420964	4.97389	0.0128925	0.909598	0.999827	NS	Serine racemase
ENSMUSG00000001333	Sync	0.0918662	1.01226	0.00554454	0.940643	0.999827	NS	syncoilin
ENSMUSG00000001334	Fndc5	0.0722019	3.43877	0.0160422	0.899211	0.999827	NS	Fibronectin type III domain-containing protein 5 Irisin
ENSMUSG00000001349	Cnn1	-0.995079	2.14295	0.462675	0.496376	0.999827	NS	Calponin-1
ENSMUSG00000001366	Fbxo9	0.0364964	6.13716	0.0197361	0.888276	0.999827	NS	F-box only protein 9
ENSMUSG00000001376	Vps50	-0.1364	5.65223	0.25562	0.613145	0.999827	NS	VPS50 EARP/GARPII complex subunit
ENSMUSG00000001380	Hars	-0.0295174	5.09577	0.00845987	0.926716	0.999827	NS	Histidine--tRNA ligase, cytoplasmic
ENSMUSG00000001383	Zmat2	0.173839	5.2623	0.320721	0.571174	0.999827	NS	zinc finger, matrin type 2
ENSMUSG00000001403	Ube2c	-2.37118	1.69511	2.41556	0.120135	0.999827	NS	ubiquitin-conjugating enzyme E2C
ENSMUSG00000001415	Smg5	-0.659108	4.09309	2.08055	0.149186	0.999827	NS	Protein SMG5
ENSMUSG00000001416	Cct3	-0.0187777	7.29865	0.00398391	0.949672	0.999827	NS	chaperonin containing Tcp1, subunit 3 (gamma)
ENSMUSG00000001418	Glmp	-0.00635441	6.18364	0.000575734	0.980857	0.999827	NS	Glycosylated lysosomal membrane protein
ENSMUSG00000001419	Mef2d	-0.213869	6.3799	0.674123	0.411618	0.999827	NS	Myocyte-specific enhancer factor 2D
ENSMUSG00000001424	Snd1	-0.118163	8.50946	0.074444	0.784973	0.999827	NS	Staphylococcal nuclease domain-containing protein 1
ENSMUSG00000001435	Col18a1	-0.339449	4.40984	0.696822	0.403854	0.999827	NS	Collagen alpha-1(XVIII) chain Endostatin Non-collagenous domain 1
ENSMUSG00000001436	Slc19a1	0.821014	3.73105	2.57364	0.108658	0.999827	NS	solute carrier family 19 (folate transporter), member 1
ENSMUSG00000001440	Kpnb1	0.428498	5.19453	1.73024	0.18838	0.999827	NS	Importin subunit beta-1
ENSMUSG00000001441	Npepps	0.046742	5.80336	0.0285133	0.865908	0.999827	NS	Puromycin-sensitive aminopeptidase
ENSMUSG00000001445	Mrpl10	-0.155156	6.01624	0.293291	0.588119	0.999827	NS	39S ribosomal protein L10, mitochondrial
ENSMUSG00000001467	Cyp51	0.45005	6.50909	2.6112	0.106112	0.999827	NS	Lanosterol 14-alpha demethylase
ENSMUSG00000001472	Tcf25	0.0726806	8.3003	0.0344714	0.852708	0.999827	NS	Transcription factor 25
ENSMUSG00000001473	Tubb6	0.418125	4.45618	0.659089	0.416882	0.999827	NS	tubulin, beta 6 class V
ENSMUSG00000001482	Def8	0.0592979	5.98873	0.0452615	0.831524	0.999827	NS	Differentially expressed in FDCP 8
ENSMUSG00000001493	Meox1	0.30931	2.95661	0.218924	0.639861	0.999827	NS	Homeobox protein MOX-1
ENSMUSG00000001504	Irx2	0.543928	4.01544	0.915048	0.338778	0.999827	NS	Iroquois-class homeodomain protein IRX-2
ENSMUSG00000001506	Col1a1	-1.89787	6.81557	1.67123	0.196094	0.999827	NS	Collagen alpha-1(I) chain
ENSMUSG00000001507	Itga3	-0.0646524	5.13764	0.0301486	0.862154	0.999827	NS	Integrin alpha-3 Integrin alpha-3 heavy chain Integrin alpha-3 light chain
ENSMUSG00000001517	Foxm1	-0.528969	2.26554	0.363478	0.546581	0.999827	NS	forkhead box M1
ENSMUSG00000001518	Itfg2	0.28311	4.67762	0.590144	0.442363	0.999827	NS	KICSTOR complex protein ITFG2
ENSMUSG00000001520	Nrip2	0.595643	0.373386	0.163376	0.686067	0.999827	NS	Nuclear receptor-interacting protein 2
ENSMUSG00000001521	Tulp3	0.646752	2.12506	0.531789	0.465856	0.999827	NS	tubby-like protein 3
ENSMUSG00000001524	Gtf2h4	0.371054	3.47168	0.425266	0.514321	0.999827	NS	general transcription factor II H, polypeptide 4
ENSMUSG00000001525	Tubb5	0.211901	6.19838	0.517036	0.472109	0.999827	NS	tubulin, beta 5 class I
ENSMUSG00000001542	Ell2	0.220761	5.70091	0.711013	0.399108	0.999827	NS	RNA polymerase II elongation factor ELL2
ENSMUSG00000001552	Jup	0.00157089	7.11247	2.97695e-05	0.995647	0.999827	NS	Junction plakoglobin
ENSMUSG00000001555	Fkbp10	-0.068993	2.75805	0.00678445	0.934354	0.999827	NS	Peptidyl-prolyl cis-trans isomerase FKBP10
ENSMUSG00000001566	Mnx1	-0.124314	6.43043	0.206404	0.649601	0.999827	NS	motor neuron and pancreas homeobox 1
ENSMUSG00000001569	Nom1	-0.0612838	5.52896	0.0510608	0.821228	0.999827	NS	Nucleolar MIF4G domain-containing protein 1
ENSMUSG00000001576	Ergic1	0.0827378	7.37385	0.0773133	0.780972	0.999827	NS	Endoplasmic reticulum-Golgi intermediate compartment protein 1
ENSMUSG00000001583	Tnk1	-0.129366	4.46614	0.102078	0.74935	0.999827	NS	Non-receptor tyrosine-protein kinase TNK1
ENSMUSG00000001604	Tcea3	0.0294651	0.0573771	0.000331302	0.985478	0.999827	NS	Transcription elongation factor A protein 3
ENSMUSG00000001630	Stk38l	0.0119115	5.2674	0.00143825	0.969748	0.999827	NS	Mus musculus serine/threonine kinase 38 like (Stk38l), transcript variant 2, mRNA.
ENSMUSG00000001632	Brpf1	0.400416	5.99127	1.35835	0.243824	0.999827	NS	Peregrin
ENSMUSG00000001642	Akr1b3	-0.0762055	6.34626	0.065678	0.797737	0.999827	NS	Aldose reductase
ENSMUSG00000001663	Gstt1	0.261851	3.9571	0.285561	0.593079	0.999827	NS	Glutathione S-transferase theta-1
ENSMUSG00000001665	Gstt3	0.992736	0.644241	0.503899	0.477792	0.999827	NS	Mus musculus glutathione S-transferase, theta 3 (Gstt3), transcript variant 2, mRNA.
ENSMUSG00000001666	Ddt	0.122601	3.33124	0.0411796	0.839192	0.999827	NS	D-dopachrome decarboxylase
ENSMUSG00000001670	Tat	-0.946443	2.30045	1.19631	0.27406	0.999827	NS	tyrosine aminotransferase
ENSMUSG00000001672	Marveld3	0.279356	5.64871	1.06307	0.302516	0.999827	NS	MARVEL domain containing 3
ENSMUSG00000001674	Ddx18	0.205301	5.253	0.425613	0.514149	0.999827	NS	ATP-dependent RNA helicase DDX18
ENSMUSG00000001687	Ubl3	0.0412646	8.96691	0.00637024	0.936385	0.999827	NS	ubiquitin-like 3
ENSMUSG00000001700	Gramd3	-0.141507	6.57828	0.297158	0.58567	0.999827	NS	GRAM domain containing 2B
ENSMUSG00000001707	Eef1e1	0.0325621	3.5115	0.00344693	0.953183	0.999827	NS	Eukaryotic translation elongation factor 1 epsilon-1
ENSMUSG00000001729	Akt1	-0.00349134	7.95965	0.000104383	0.991848	0.999827	NS	Mus musculus thymoma viral proto-onco 1 (Akt1), transcript variant 3, mRNA.
ENSMUSG00000001750	Tcirg1	0.492175	2.45148	0.374296	0.540672	0.999827	NS	T cell, immune regulator 1, ATPase, H+ transporting, lysosomal V0 protein A3
ENSMUSG00000001751	Naglu	-0.103122	5.56593	0.146022	0.702366	0.999827	NS	alpha-N-acetylglucosaminidase (Sanfilippo disease IIIB)
ENSMUSG00000001755	Ppat	-0.0624616	5.62607	0.0510397	0.821264	0.999827	NS	Coenzyme A synthase
ENSMUSG00000001761	Smo	0.155335	3.20262	0.0562939	0.812453	0.999827	NS	smoothened, frizzled class receptor
ENSMUSG00000001763	Tspan33	0.372209	5.70953	1.9597	0.161546	0.999827	NS	Tetraspanin-33
ENSMUSG00000001767	Crnkl1	0.103524	5.61436	0.15386	0.694873	0.999827	NS	Crooked neck-like protein 1
ENSMUSG00000001768	Rin2	0.442572	3.66577	0.71055	0.399261	0.999827	NS	Ras and Rab interactor 2
ENSMUSG00000001774	Chordc1	0.0304762	5.2583	0.00842356	0.926873	0.999827	NS	Cysteine and histidine-rich domain-containing protein 1
ENSMUSG00000001783	Rtcb	-0.041462	7.61292	0.0182613	0.892506	0.999827	NS	tRNA-splicing ligase RtcB homolog
ENSMUSG00000001785	Pwp1	-0.307059	5.19519	0.904427	0.341597	0.999827	NS	Periodic tryptophan
ENSMUSG00000001786	Fbxo7	0.0363293	5.29019	0.01267	0.910379	0.999827	NS	Mus musculus F-box protein 7 (Fbxo7), transcript variant 3, mRNA.
ENSMUSG00000001794	Capns1	0.0485458	4.4688	0.0137106	0.906787	0.999827	NS	calpain small subunit 1
ENSMUSG00000001802	Lrp3	0.0618543	5.88399	0.0538733	0.816456	0.999827	NS	LDL receptor related protein 3
ENSMUSG00000001827	Folr1	0.254922	4.32678	0.372738	0.541516	0.999827	NS	Folate receptor alpha
ENSMUSG00000001829	Clpb	-0.123875	5.08052	0.143465	0.70486	0.999827	NS	Caseinolytic peptidase B protein homolog
ENSMUSG00000001833	Sept7	0.101145	7.52515	0.11127	0.738703	0.999827	NS	septin-7 isoform 2
ENSMUSG00000001844	Zdhhc4	0.516577	5.48655	3.48213	0.0620347	0.999827	NS	zinc finger, DHHC domain containing 4
ENSMUSG00000001847	Rac1	-0.0768189	7.72824	0.0573587	0.81072	0.999827	NS	RAS-related C3 botulinum substrate 1
ENSMUSG00000001855	Nup214	-0.435698	5.57938	2.56573	0.109202	0.999827	NS	Nuclear pore complex protein Nup214
ENSMUSG00000001870	Ltbp1	0.492558	1.43835	0.195666	0.658242	0.999827	NS	Latent-transforming growth factor beta-binding protein 1
ENSMUSG00000001891	Ugp2	0.234414	5.51821	0.741905	0.389051	0.999827	NS	UDP-glucose pyrophosphorylase 2
ENSMUSG00000001901	Kcnh6	0.0224222	6.41982	0.00742407	0.931337	0.999827	NS	potassium voltage-gated channel, subfamily H (eag-related), member 6
ENSMUSG00000001909	Trmt1	0.543358	4.55238	1.88794	0.169434	0.999827	NS	tRNA methyltransferase 1
ENSMUSG00000001910	Nacc1	0.578117	3.99403	1.32082	0.250446	0.999827	NS	Nucleus accumbens-associated protein 1
ENSMUSG00000001911	Nfix	0.243477	3.62739	0.191057	0.662039	0.999827	NS	Nuclear factor 1 X-type
ENSMUSG00000001918	Slc1a5	0.90836	2.20268	0.357453	0.549924	0.999827	NS	solute carrier family 1 (neutral amino acid transporter), member 5
ENSMUSG00000001924	Uba1	0.0646891	7.97051	0.0343217	0.853024	0.999827	NS	ubiquitin-like modifier activating enzyme 1
ENSMUSG00000001942	Siae	-0.0269957	5.01609	0.00585006	0.939033	0.999827	NS	Sialate O-acetylesterase Sialate O-acetylesterase small subunit Sialate O-acetylesterase large subun
ENSMUSG00000001943	Vsig2	1.39866	0.584629	0.950496	0.329593	0.999827	NS	V-set and immunoglobulin domain containing 2
ENSMUSG00000001946	Esam	-0.0040911	2.10582	2.00606e-05	0.996426	0.999827	NS	Endothelial cell-selective adhesion molecule
ENSMUSG00000001948	Spa17	-0.276073	3.21066	0.196213	0.657796	0.999827	NS	sperm autoantigenic protein 17
ENSMUSG00000001962	Fam50a	-0.0455075	4.95213	0.0113682	0.915089	0.999827	NS	Protein FAM50A
ENSMUSG00000001964	Emd	0.196558	4.67574	0.292053	0.588908	0.999827	NS	Emerin
ENSMUSG00000001983	Taco1	-0.381887	2.14539	0.190226	0.662728	0.999827	NS	Translational activator of cytochrome c oxidase 1
ENSMUSG00000001985	Grik3	1.88581	1.25862	1.21118	0.271099	0.999827	NS	Glutamate receptor ionotropic, kainate 3
ENSMUSG00000001986	Gria3	0.285325	3.05648	0.189294	0.663505	0.999827	NS	Mus musculus glutamate receptor, ionotropic, AMPA3 (alpha 3) (Gria3), transcript variant 5, mRNA.
ENSMUSG00000001995	Sipa1l2	-0.386233	2.8614	0.267765	0.604835	0.999827	NS	Mus musculus signal-induced proliferation-associated 1 like 2 (Sipa1l2), transcript variant 2, mRNA.
ENSMUSG00000001998	Ap4e1	-0.612094	3.55299	0.611788	0.434115	0.999827	NS	AP-4 complex subunit epsilon-1
ENSMUSG00000001999	Blvra	0.152308	3.60515	0.0788992	0.778795	0.999827	NS	Biliverdin reductase A
ENSMUSG00000002010	Idh3g	0.0265995	6.83448	0.0107562	0.917398	0.999827	NS	isocitrate dehydrogenase 3 (NAD+), gamma
ENSMUSG00000002012	Pnck	0.647257	3.11957	0.985029	0.32096	0.999827	NS	pregnancy upregulated non-ubiquitously expressed CaM kinase
ENSMUSG00000002014	Ssr4	-0.0794122	6.89452	0.0691882	0.792522	0.999827	NS	signal sequence receptor, delta
ENSMUSG00000002015	Bcap31	0.0586505	6.48299	0.0495126	0.823914	0.999827	NS	B-cell receptor-associated protein 31
ENSMUSG00000002017	Fam98a	-0.759496	4.73594	3.94288	0.0470702	0.999827	NS	Protein FAM98A
ENSMUSG00000002020	Ltbp2	1.1029	3.42271	3.1991	0.0736787	0.999827	NS	latent transforming growth factor beta binding protein 2
ENSMUSG00000002028	Kmt2a	0.288972	5.21344	0.861825	0.353228	0.999827	NS	Mus musculus lysine (K)-specific methyltransferase 2A (Kmt2a), transcript variant 1, mRNA.
ENSMUSG00000002031	Ift46	-0.823151	4.64833	4.637	0.0312896	0.999827	NS	Intraflagellar transport
ENSMUSG00000002032	Tmem25	-0.44561	5.06359	1.53889	0.214784	0.999827	NS	Mus musculus transmembrane protein 25 (Tmem25), transcript variant 5, mRNA.
ENSMUSG00000002043	Trappc6a	-0.669568	3.73382	1.70321	0.191869	0.999827	NS	trafficking protein particle complex 6A
ENSMUSG00000002052	Supt6	-0.520535	6.40465	4.33918	0.0372449	0.999827	NS	Transcription elongation factor SPT6
ENSMUSG00000002055	Spag5	-0.0274821	2.09725	0.000947484	0.975444	0.999827	NS	Sperm-associated antigen 5
ENSMUSG00000002057	Foxn1	-1.46998	0.940363	0.766671	0.381249	0.999827	NS	Forkhead box protein N1
ENSMUSG00000002058	Unc119	0.380223	4.01833	0.676968	0.410633	0.999827	NS	unc-119 lipid binding chaperone
ENSMUSG00000002059	Rab34	-0.021574	4.42009	0.00280941	0.957729	0.999827	NS	RAB34, member RAS oncogene family
ENSMUSG00000002064	Sdf2	-0.0129249	5.35785	0.00199126	0.964407	0.999827	NS	stromal cell derived factor 2
ENSMUSG00000002068	Ccne1	-0.167105	2.6937	0.0503307	0.822489	0.999827	NS	G1/S-specific cyclin-E1
ENSMUSG00000002083	Bbc3	-0.0333924	1.51346	0.00090385	0.976016	0.999827	NS	Bcl-2-binding component 3
ENSMUSG00000002102	Psmc3	0.0386636	6.18903	0.0208883	0.885084	0.999827	NS	proteasome (prosome, macropain) 26S subunit, ATPase 3
ENSMUSG00000002103	Acp2	0.0833914	6.08177	0.0700439	0.791273	0.999827	NS	Mus musculus acid phosphatase 2, lysosomal (Acp2), transcript variant 1, mRNA.
ENSMUSG00000002105	Slc39a13	-0.552376	4.95153	2.50917	0.113185	0.999827	NS	solute carrier family 39 (metal ion transporter), member 13
ENSMUSG00000002107	Celf2	0.61009	5.0839	3.1535	0.0757644	0.999827	NS	CUGBP Elav-like family member 2
ENSMUSG00000002108	Nr1h3	0.424721	3.44301	0.515508	0.472764	0.999827	NS	Mus musculus nuclear receptor subfamily 1, group H, member 3 (Nr1h3), transcript variant 3, mRNA.
ENSMUSG00000002109	Ddb2	-0.147581	2.51818	0.0374489	0.846554	0.999827	NS	DNA damage-binding protein 2
ENSMUSG00000002111	Spi1	0.789285	0.227074	0.241171	0.623362	0.999827	NS	spleen focus forming virus (SFFV) proviral integration oncogene
ENSMUSG00000002129	Sf3a1	-0.0510651	5.91229	0.0365003	0.848486	0.999827	NS	Splicing factor 3A subunit 1
ENSMUSG00000002147	Stat6	-0.155377	5.21576	0.210956	0.646019	0.999827	NS	Signal transducer and transcription activator 6
ENSMUSG00000002205	Vrk3	-0.0356102	4.88054	0.0102695	0.919282	0.999827	NS	vaccinia related kinase 3
ENSMUSG00000002210	Smg9	-0.00779179	4.23629	0.000332451	0.985453	0.999827	NS	Protein SMG9
ENSMUSG00000002221	Paxip1	-0.188099	7.04974	0.475458	0.490487	0.999827	NS	PAX-interacting protein 1
ENSMUSG00000002222	Rmnd5a	-0.345598	5.8997	1.62607	0.202248	0.999827	NS	A
ENSMUSG00000002227	Mov10	0.445057	5.03202	1.58233	0.208425	0.999827	NS	Putative helicase MOV-10
ENSMUSG00000002233	Rhoc	0.0779343	2.4263	0.00931055	0.92313	0.999827	NS	Rho-related GTP-binding protein RhoC
ENSMUSG00000002257	Def6	0.0411304	0.908089	0.00102004	0.974521	0.999827	NS	DEF6, guanine nucleotide exchange factor
ENSMUSG00000002265	Peg3	-0.084501	10.5212	0.0117499	0.913681	0.999827	NS	Paternally-expressed 3 protein
ENSMUSG00000002266	Zim1	0.532864	5.18205	2.14745	0.142807	0.999827	NS	zinc finger, imprinted 1
ENSMUSG00000002274	Metrn	-0.0163864	0.807526	0.000152999	0.990131	0.999827	NS	meteorin, glial cell differentiation regulator
ENSMUSG00000002279	Lmf1	0.11975	4.44479	0.0925181	0.761	0.999827	NS	Lipase maturation factor 1
ENSMUSG00000002280	Narfl	-0.0944331	5.30944	0.0962292	0.756403	0.999827	NS	Cytosolic Fe-S cluster assembly factor NARFL
ENSMUSG00000002289	Angptl4	-1.09737	0.669482	0.608006	0.435539	0.999827	NS	Angiopoietin-related protein 4
ENSMUSG00000002297	Dbf4	-0.70343	2.24026	0.680986	0.409247	0.999827	NS	A
ENSMUSG00000002307	Daxx	0.182374	4.80602	0.273245	0.601163	0.999827	NS	Mus musculus Fas death domain-associated protein (Daxx), transcript variant 3, mRNA.
ENSMUSG00000002308	Cd320	-0.0509725	2.82313	0.00524989	0.942239	0.999827	NS	CD320 antigen
ENSMUSG00000002319	Ipo4	0.0496235	6.15651	0.0323315	0.857302	0.999827	NS	Importin-4
ENSMUSG00000002320	Tm9sf1	0.0343203	6.64397	0.0155642	0.900716	0.999827	NS	Transmembrane 9 superfamily member 1
ENSMUSG00000002324	Rec8	-0.769565	0.871521	0.347976	0.555261	0.999827	NS	Meiotic recombination
ENSMUSG00000002325	Irf9	0.0807648	3.30438	0.0135537	0.907319	0.999827	NS	Interferon regulatory factor 9
ENSMUSG00000002326	Gmpr2	0.189304	3.922	0.157735	0.69125	0.999827	NS	guanosine monophosphate reductase 2
ENSMUSG00000002329	Mdp1	-0.177335	4.73391	0.161043	0.688198	0.999827	NS	Magnesium-dependent phosphatase 1
ENSMUSG00000002332	Dhrs1	-0.743878	4.27296	3.03242	0.081616	0.999827	NS	Dehydrogenase/reductase SDR family member 1
ENSMUSG00000002342	Tmem161a	-0.0372343	5.34695	0.0150408	0.902391	0.999827	NS	Transmembrane protein 161A
ENSMUSG00000002343	Armc6	-0.188764	3.39622	0.103945	0.747146	0.999827	NS	Armadillo repeat-containing protein 6
ENSMUSG00000002345	Borcs8	0.18176	3.09192	0.0805631	0.776536	0.999827	NS	BLOC-1-related complex subunit 8
ENSMUSG00000002346	Slc25a42	-0.181277	3.70161	0.119623	0.729443	0.999827	NS	Mitochondrial coenzyme A transporter SLC25A42
ENSMUSG00000002365	Snx9	0.147841	5.34881	0.246297	0.619695	0.999827	NS	sorting nexin 9
ENSMUSG00000002372	Ranbp3	-0.0301044	6.5069	0.0138957	0.906163	0.999827	NS	Ran-binding protein 3
ENSMUSG00000002379	Ndufa11	-0.139374	6.01515	0.297558	0.585418	0.999827	NS
ENSMUSG00000002393	Nr2f6	0.0472457	5.82052	0.0314466	0.859248	0.999827	NS	Nuclear receptor subfamily 2 group F member 6
ENSMUSG00000002395	Use1	0.0510526	4.45233	0.0169671	0.896362	0.999827	NS	unconventional SNARE in the ER 1 homolog (S. cerevisiae)
ENSMUSG00000002396	Ocel1	0.232561	3.84494	0.231216	0.630624	0.999827	NS	occludin/ELL domain containing 1
ENSMUSG00000002409	Dyrk1b	-0.333709	3.30469	0.301153	0.583161	0.999827	NS	Dual specificity tyrosine-phosphorylation-regulated kinase 1B
ENSMUSG00000002413	Braf	-0.0808732	6.32063	0.101467	0.750076	0.999827	NS	Serine/threonine-protein kinase B-raf
ENSMUSG00000002416	Ndufb2	-0.103271	5.3807	0.121451	0.727466	0.999827	NS	NADH dehydrogenase [ubiquinone] 1 beta subcomplex subunit 2, mitochondrial
ENSMUSG00000002428	Hltf	-0.67051	4.8952	3.47303	0.0623769	0.999827	NS	Helicase-like transcription factor
ENSMUSG00000002455	Prpf6	0.124943	6.89286	0.22882	0.6324	0.999827	NS	Pre-mRNA-processing factor 6
ENSMUSG00000002458	Rgs19	0.441984	1.77861	0.186079	0.6662	0.999827	NS	regulator of G-protein signaling 19
ENSMUSG00000002475	Abhd3	-0.860309	2.5165	1.24429	0.264646	0.999827	NS	abhydrolase domain containing 3
ENSMUSG00000002477	Snrpd1	0.225534	4.44647	0.327901	0.566898	0.999827	NS	Small nuclear ribonucleoprotein Sm D1
ENSMUSG00000002486	Tchp	0.552026	3.92466	1.2944	0.255239	0.999827	NS	Trichoplein keratin filament-binding protein
ENSMUSG00000002496	Tsc2	0.269516	6.38004	0.966984	0.325434	0.999827	NS	tuberous sclerosis 2
ENSMUSG00000002504	Slc9a3r2	0.172635	3.21759	0.0738835	0.785764	0.999827	NS	solute carrier family 9 (sodium/hydrogen exchanger), member 3 regulator 2
ENSMUSG00000002524	Puf60	-0.0055686	7.48488	0.000358095	0.984902	0.999827	NS	Poly(U)-binding-splicing factor PUF60
ENSMUSG00000002546	Golga2	-0.334615	6.21673	1.65514	0.198261	0.999827	NS	golgi autoantigen, golgin subfamily a, 2
ENSMUSG00000002550	Uck1	-0.000287141	5.77307	1.00513e-06	0.9992	0.999827	NS	uridine-cytidine kinase 1
ENSMUSG00000002565	Scin	-0.313272	2.04222	0.0442477	0.833393	0.999827	NS	scinderin
ENSMUSG00000002578	Ikzf4	-0.235404	3.16226	0.130582	0.717829	0.999827	NS	Mus musculus IKAROS family zinc finger 4 (Ikzf4), transcript variant 3, mRNA.
ENSMUSG00000002580	Mien1	-0.0181633	6.05135	0.00507657	0.943199	0.999827	NS	Migration and invasion enhancer 1
ENSMUSG00000002602	Axl	-0.605305	4.37228	0.678721	0.410028	0.999827	NS	AXL receptor tyrosine kinase
ENSMUSG00000002603	Tgfb1	-0.469854	-0.269861	0.0642873	0.799844	0.999827	NS	transforming growth factor, beta 1
ENSMUSG00000002608	Ccdc97	0.452998	5.23847	1.57712	0.209176	0.999827	NS	Coiled-coil domain-containing protein 97
ENSMUSG00000002617	Zfp40	-0.5289	4.07312	0.896968	0.343596	0.999827	NS	zinc finger protein 40
ENSMUSG00000002625	Akap8l	0.364152	5.82981	1.58617	0.207875	0.999827	NS	A-kinase anchoring protein 8 like
ENSMUSG00000002635	Pdcd2l	0.235617	4.44135	0.340828	0.559352	0.999827	NS	Programmed cell death protein 2-like
ENSMUSG00000002658	Gtf2f1	0.144485	5.00342	0.170722	0.679471	0.999827	NS	ral transcription factor IIF subunit 1
ENSMUSG00000002660	Clpp	0.0569146	5.25226	0.0341071	0.853479	0.999827	NS	ATP-dependent Clp protease proteolytic subunit, mitochondrial
ENSMUSG00000002661	Alkbh7	0.128077	3.31291	0.0478624	0.826826	0.999827	NS	Alpha-ketoglutarate-dependent dioxygenase alkB homolog 7, mitochondrial
ENSMUSG00000002668	Dennd1c	1.76472	1.8724	3.11294	0.0776728	0.999827	NS	DENN domain-containing protein 1C
ENSMUSG00000002679	Med6	-0.285978	4.08568	0.374435	0.540596	0.999827	NS	Mus musculus mediator complex subunit 6 (Med6), transcript variant 1, mRNA.
ENSMUSG00000002688	Prkd1	-0.438676	4.66158	1.20536	0.272253	0.999827	NS	protein kinase D1
ENSMUSG00000002718	Cse1l	0.20538	6.74815	0.571223	0.449773	0.999827	NS	Exportin-2
ENSMUSG00000002728	Naa20	0.0499175	6.54943	0.0382863	0.844869	0.999827	NS	N-alpha-acetyltransferase 20
ENSMUSG00000002731	Prkra	0.602222	3.02818	0.824996	0.363724	0.999827	NS	Interferon-inducible double-stranded RNA-dependent protein kinase activator A
ENSMUSG00000002732	Fkbp7	-0.342825	1.17656	0.0700807	0.791219	0.999827	NS	Mus musculus FK506 binding protein 7 (Fkbp7), transcript variant 2, mRNA.
ENSMUSG00000002733	Plekha3	0.0630391	5.35303	0.0466398	0.829017	0.999827	NS	Pleckstrin homology domain-containing family A member 3
ENSMUSG00000002741	Ykt6	-0.520384	5.46443	3.47747	0.0622098	0.999827	NS	YKT6 v-SNARE homolog (S. cerevisiae)
ENSMUSG00000002748	Baz1b	0.00243691	6.27055	8.83995e-05	0.992498	0.999827	NS	Tyrosine-protein kinase BAZ1B
ENSMUSG00000002763	Pex6	-0.120987	5.73437	0.198909	0.655603	0.999827	NS	Peroxisome assembly factor 2
ENSMUSG00000002767	Mrpl2	-0.196705	5.17341	0.389633	0.532493	0.999827	NS	mitochondrial ribosomal protein L2
ENSMUSG00000002768	Mea1	-0.0205406	4.80027	0.00349747	0.952841	0.999827	NS	Male-enhanced antigen 1
ENSMUSG00000002769	Gnmt	1.21484	1.01	0.892087	0.344912	0.999827	NS	glycine N-methyltransferase
ENSMUSG00000002771	Grin2d	-0.201776	0.603715	0.021271	0.884043	0.999827	NS	Glutamate receptor ionotropic, NMDA 2D
ENSMUSG00000002778	Kdelr1	-0.12562	5.99434	0.235478	0.627491	0.999827	NS	KDEL (Lys-Asp-Glu-Leu) endoplasmic reticulum protein retention receptor 1
ENSMUSG00000002781	Tmem143	-0.694105	1.8138	0.477528	0.489544	0.999827	NS	transmembrane protein 143
ENSMUSG00000002797	Ggct	0.39417	2.81468	0.265194	0.606574	0.999827	NS	Gamma-glutamylcyclotransferase
ENSMUSG00000002799	Jag2	-0.295046	5.40527	1.09773	0.294765	0.999827	NS	Protein jagged-2
ENSMUSG00000002803	Btbd6	0.0764088	4.91643	0.0439944	0.833864	0.999827	NS	BTB/POZ domain-containing protein 6
ENSMUSG00000002804	Nudt14	0.0830999	4.25762	0.0382252	0.844992	0.999827	NS	Uridine diphosphate glucose pyrophosphatase
ENSMUSG00000002808	Epdr1	0.207976	3.7501	0.169614	0.680455	0.999827	NS	Mammalian ependymin-related protein 1
ENSMUSG00000002812	Flii	-0.0161752	6.42443	0.00363918	0.951896	0.999827	NS	isoform 2
ENSMUSG00000002814	Top3a	-0.258239	3.94432	0.221411	0.637967	0.999827	NS	topoisomerase (DNA) III alpha
ENSMUSG00000002820	Atg4d	-0.042314	5.07915	0.0172637	0.895466	0.999827	NS	Cysteine protease ATG4D Cysteine protease ATG4D, mitochondrial
ENSMUSG00000002825	Qtrt1	-0.417818	4.17289	0.726976	0.393865	0.999827	NS	Queuine tRNA-ribosyltransferase catalytic subunit 1
ENSMUSG00000002833	Hdgfl2	-0.202979	5.4684	0.504771	0.477411	0.999827	NS	Mus musculus HDGF like 2 (Hdgfl2), transcript variant 4, mRNA.
ENSMUSG00000002835	Chaf1a	0.440565	3.1675	0.331939	0.564519	0.999827	NS	Chromatin assembly factor 1 subunit A
ENSMUSG00000002844	Adprh	-0.0617214	5.98496	0.0552146	0.814226	0.999827	NS	[Protein ADP-ribosylarginine] hydrolase
ENSMUSG00000002845	Tmem39a	-0.104795	6.14566	0.157912	0.691086	0.999827	NS	Transmembrane protein 39A
ENSMUSG00000002846	Timmdc1	0.178218	4.0949	0.139324	0.708954	0.999827	NS	Complex I assembly factor TIMMDC1, mitochondrial
ENSMUSG00000002847	Pla1a	-0.0188679	0.725431	0.000180601	0.989278	0.999827	NS	Phospholipase A1 member A
ENSMUSG00000002870	Mcm2	0.179463	5.87419	0.24594	0.619948	0.999827	NS	DNA replication licensing factor MCM2
ENSMUSG00000002871	Tpra1	-0.191644	4.54909	0.238179	0.625524	0.999827	NS	Transmembrane protein adipocyte-associated 1
ENSMUSG00000002881	Nab1	0.191396	4.46355	0.210846	0.646105	0.999827	NS	NGFI-A-binding protein 1
ENSMUSG00000002885	Adgre5	0.354978	3.17775	0.311543	0.576735	0.999827	NS	adhesion G protein-coupled receptor E5
ENSMUSG00000002897	Il17ra	0.127006	5.399	0.198292	0.656103	0.999827	NS	Interleukin-17 receptor A
ENSMUSG00000002900	Lamb1	-0.424694	3.70829	0.44429	0.505059	0.999827	NS	Laminin subunit beta-1
ENSMUSG00000002908	Kcnn1	0.561937	2.53434	0.49764	0.480539	0.999827	NS	potassium calcium-activated channel subfamily N member 1
ENSMUSG00000002910	Arrdc2	-0.602193	3.24231	0.970027	0.324674	0.999827	NS	Arrestin domain-containing protein 2
ENSMUSG00000002944	Cd36	0.485785	2.32184	0.28365	0.594319	0.999827	NS	Platelet glycoprotein 4
ENSMUSG00000002948	Map2k7	0.154202	5.80015	0.307459	0.579244	0.999827	NS	Dual specificity mitogen-activated protein kinase kinase 7
ENSMUSG00000002949	Timm44	0.60284	4.52917	1.86966	0.171514	0.999827	NS	translocase of inner mitochondrial membrane 44
ENSMUSG00000002957	Ap2a2	-0.26256	7.17317	0.700178	0.402724	0.999827	NS	Mus musculus adaptor-related protein complex 2, alpha 2 subunit (Ap2a2), transcript variant 1, mRNA.
ENSMUSG00000002963	Pnkp	0.321095	4.36077	0.622001	0.430305	0.999827	NS	polynucleotide kinase 3'- phosphatase
ENSMUSG00000002968	Med25	-0.00884664	6.75089	0.00120505	0.972308	0.999827	NS	Mus musculus mediator complex subunit 25 (Med25), transcript variant 3, mRNA.
ENSMUSG00000002980	Bcam	0.307641	3.75782	0.346942	0.555849	0.999827	NS	Basal cell adhesion molecule
ENSMUSG00000002981	Clptm1	0.054365	7.16231	0.0385853	0.844272	0.999827	NS	Cleft lip and palate transmembrane
ENSMUSG00000002983	Relb	-0.197217	3.45768	0.11145	0.7385	0.999827	NS	avian reticuloendotheliosis viral (v-rel) oncogene related B
ENSMUSG00000002984	Tomm40	-0.0287256	5.67417	0.010197	0.919566	0.999827	NS	Mitochondrial import receptor subunit TOM40 homolog
ENSMUSG00000002985	Apoe	0.13917	5.34158	0.0815667	0.775185	0.999827	NS	Apolipoprotein E
ENSMUSG00000002997	Prkar2b	-0.171243	6.95897	0.372617	0.541581	0.999827	NS	protein kinase, cAMP dependent regulatory, type II beta
ENSMUSG00000003031	Cdkn1b	0.791902	3.14508	1.49204	0.2219	0.999827	NS	Cyclin-dependent kinase inhibitor 1B
ENSMUSG00000003032	Klf4	1.05396	3.25834	2.68669	0.10119	0.999827	NS	Krueppel-like factor 4
ENSMUSG00000003033	Ap1m1	0.0791916	6.34849	0.0924382	0.7611	0.999827	NS	AP-1 complex subunit mu-1
ENSMUSG00000003037	Rab8a	-0.0383467	6.87084	0.0212114	0.884204	0.999827	NS	RAB8A, member RAS oncogene family
ENSMUSG00000003038	Hmgn2	-0.114919	8.73083	0.059457	0.807356	0.999827	NS	Non-histone chromosomal protein HMG-17
ENSMUSG00000003039	Fam32a	-0.0500415	6.69326	0.0390362	0.843377	0.999827	NS	Protein FAM32A
ENSMUSG00000003051	Elf3	0.520913	5.92994	2.15873	0.141762	0.999827	NS	ETS-related transcription factor Elf-3
ENSMUSG00000003062	Stard3nl	-0.119168	4.93813	0.117595	0.731658	0.999827	NS	Mus musculus STARD3 N-terminal like (Stard3nl), transcript variant 2, mRNA.
ENSMUSG00000003068	Stk11	-0.588966	6.23232	3.52481	0.0604566	0.999827	NS	Serine/threonine-protein kinase STK11
ENSMUSG00000003070	Efna2	0.00951186	4.36693	0.000547695	0.981329	0.999827	NS	Ephrin-A2
ENSMUSG00000003072	Atp5d	0.0168588	6.61666	0.00450101	0.94651	0.999827	NS	ATP synthase subunit delta, mitochondrial
ENSMUSG00000003099	Ppp5c	-0.146063	6.12005	0.31821	0.572685	0.999827	NS	Serine/threonine-protein phosphatase 5
ENSMUSG00000003119	Cdk12	-0.113786	2.8336	0.0260032	0.871892	0.999827	NS	Cyclin-dependent kinase 12
ENSMUSG00000003123	Lipe	-1.26158	2.13717	2.01447	0.155806	0.999827	NS	Hormone-sensitive lipase
ENSMUSG00000003131	Pafah1b2	-0.290414	8.01007	0.712064	0.398759	0.999827	NS	Platelet-activating factor acetylhydrolase IB subunit beta
ENSMUSG00000003134	Tbc1d8	0.0427536	5.67146	0.024028	0.876814	0.999827	NS	Mus musculus TBC1 domain family, member 8 (Tbc1d8), transcript variant 3, mRNA.
ENSMUSG00000003135	Cnot11	-0.389732	4.56871	0.9565	0.32807	0.999827	NS	CCR4-NOT transcription complex subunit 11
ENSMUSG00000003154	Foxj2	-0.123785	5.4582	0.183932	0.668015	0.999827	NS	Forkhead box protein J2
ENSMUSG00000003161	Sri	-0.104335	6.29842	0.168002	0.681894	0.999827	NS	Sorcin
ENSMUSG00000003166	Dgcr2	-0.0232644	7.39613	0.00596835	0.938421	0.999827	NS
ENSMUSG00000003184	Irf3	0.226324	3.86643	0.224924	0.635314	0.999827	NS	interferon regulatory factor 3
ENSMUSG00000003190	Bcl2l12	0.203988	0.118129	0.0161205	0.898967	0.999827	NS	BCL2-like 12 (proline rich)
ENSMUSG00000003198	Zfp959	0.0660304	3.42628	0.0123659	0.911456	0.999827	NS	zinc finger protein 959
ENSMUSG00000003199	Mpnd	0.389002	5.56341	2.00827	0.156444	0.999827	NS	MPN domain-containing protein
ENSMUSG00000003200	Sh3gl1	0.165297	6.41898	0.384712	0.535092	0.999827	NS	SH3-domain GRB2-like 1
ENSMUSG00000003206	Ebi3	-0.128665	0.699192	0.0088118	0.925211	0.999827	NS	Interleukin-27 subunit beta
ENSMUSG00000003208	Ccdc94	0.185293	3.05351	0.0763149	0.782355	0.999827	NS	Coiled-coil domain-containing protein 94
ENSMUSG00000003226	Ranbp2	-0.0514685	7.13024	0.0325509	0.856824	0.999827	NS	E3 SUMO-protein ligase RanBP2
ENSMUSG00000003228	Grk5	-0.683811	4.2011	2.47905	0.115372	0.999827	NS	G protein-coupled receptor kinase 5
ENSMUSG00000003233	Dvl3	-0.128789	5.32388	0.184389	0.667628	0.999827	NS	Segment polarity DVL-3
ENSMUSG00000003234	Abcf3	-0.15848	6.31377	0.359225	0.548937	0.999827	NS	ATP-binding cassette, sub-family F (GCN20), member 3
ENSMUSG00000003235	Eif2b5	-0.195423	6.06111	0.540907	0.462057	0.999827	NS	Translation initiation factor eIF-2B subunit epsilon
ENSMUSG00000003269	Cyth2	0.224643	6.05296	0.754947	0.384914	0.999827	NS	Cytohesin-2
ENSMUSG00000003271	Sult2b1	0.130168	2.72179	0.0326353	0.85664	0.999827	NS	Sulfotransferase family cytosolic 2B member 1
ENSMUSG00000003273	Car11	-0.292753	0.141754	0.0342341	0.85321	0.999827	NS	Carbonic anhydrase-related protein 11
ENSMUSG00000003279	Dlgap1	-0.766688	4.74142	2.7577	0.096787	0.999827	NS	Mus musculus DLG associated protein 1 (Dlgap1), transcript variant 6, mRNA.
ENSMUSG00000003282	Plag1	0.570031	1.27956	0.181642	0.669966	0.999827	NS	Zinc finger protein PLAG1
ENSMUSG00000003299	Mrpl4	-0.135896	5.39234	0.220697	0.638509	0.999827	NS	39S ribosomal protein L4, mitochondrial
ENSMUSG00000003308	Keap1	-0.319275	6.67825	1.58142	0.208556	0.999827	NS	Kelch-like ECH-associated protein 1
ENSMUSG00000003309	Ap1m2	-0.170729	5.90791	0.411867	0.521023	0.999827	NS	adaptor related protein complex 1 mu 2 subunit
ENSMUSG00000003316	Glg1	-0.0187441	7.96982	0.00305196	0.955944	0.999827	NS	Golgi apparatus protein 1
ENSMUSG00000003344	Btbd2	0.0224727	5.27702	0.00544141	0.941197	0.999827	NS	BTB (POZ) domain containing 2
ENSMUSG00000003345	Csnk1g2	-0.00194398	7.49379	4.06808e-05	0.994911	0.999827	NS	Casein kinase I isoform gamma-2
ENSMUSG00000003346	Abhd17a	0.175517	5.96322	0.451694	0.501532	0.999827	NS	abhydrolase domain containing 17A
ENSMUSG00000003348	Mob3a	0.538732	4.2175	1.56343	0.211164	0.999827	NS	MOB kinase activator 3A
ENSMUSG00000003352	Cacnb3	-0.0346533	5.96208	0.0175295	0.894669	0.999827	NS	Mus musculus calcium channel, voltage-dependent, beta 3 subunit (Cacnb3), transcript variant 4, mRNA
ENSMUSG00000003354	Ccdc65	-0.252048	0.389247	0.0186632	0.891336	0.999827	NS	Coiled-coil domain-containing protein 65
ENSMUSG00000003355	Fkbp11	0.151973	4.64708	0.165979	0.68371	0.999827	NS	Peptidyl-prolyl cis-trans isomerase FKBP11
ENSMUSG00000003360	Ddx23	1.25575	1.46502	1.19499	0.274325	0.999827	NS	DEAD-box helicase 23
ENSMUSG00000003363	Pld3	-0.073843	7.44268	0.0623359	0.802841	0.999827	NS	Phospholipase D3
ENSMUSG00000003378	Grik5	-0.0859315	3.53966	0.0227593	0.880085	0.999827	NS	Glutamate receptor ionotropic, kainate 5
ENSMUSG00000003379	Cd79a	0.06011	3.4442	0.0090518	0.924203	0.999827	NS	B-cell antigen receptor complex-associated protein alpha chain
ENSMUSG00000003380	Rabac1	0.0660235	6.78317	0.0681222	0.794091	0.999827	NS	Prenylated Rab acceptor protein 1
ENSMUSG00000003382	Etv3	-0.292525	4.54957	0.493435	0.482399	0.999827	NS	ETS translocation variant 3
ENSMUSG00000003402	Prkcsh	-0.0858836	6.24024	0.110077	0.740057	0.999827	NS	protein kinase C substrate 80K-H
ENSMUSG00000003411	Rab3b	0.658437	7.63741	4.20217	0.0403722	0.999827	NS	RAB3B, member RAS oncogene family
ENSMUSG00000003420	Fcgrt	-1.15267	2.14483	1.39952	0.236804	0.999827	NS	Mus musculus Fc receptor, IgG, alpha chain transporter (Fcgrt), transcript variant 2, mRNA.
ENSMUSG00000003421	Nosip	-0.432486	4.40588	1.07601	0.299591	0.999827	NS	Nitric oxide synthase-interacting protein
ENSMUSG00000003423	Pih1d1	-0.882113	3.32082	2.17234	0.140512	0.999827	NS	PIH1 domain-containing protein 1
ENSMUSG00000003429	Rps11	0.238316	5.7181	0.851533	0.356119	0.999827	NS	ribosomal protein S11
ENSMUSG00000003435	Supt5	-0.21235	7.4385	0.518893	0.471314	0.999827	NS	Transcription elongation factor SPT5
ENSMUSG00000003437	Paf1	-0.0649648	5.84393	0.0530882	0.817774	0.999827	NS	RNA polymerase II-associated factor 1 homolog
ENSMUSG00000003438	Timm50	-0.0914435	5.04391	0.0735986	0.786168	0.999827	NS	Mitochondrial import inner membrane translocase subunit TIM50
ENSMUSG00000003444	Med29	0.294993	4.11551	0.43715	0.508501	0.999827	NS	Mediator of RNA polymerase II transcription subunit 29
ENSMUSG00000003452	Bicd1	-0.31535	5.87915	1.18008	0.277341	0.999827	NS	Protein bicaudal D homolog 1
ENSMUSG00000003458	Ncstn	0.0651955	8.23676	0.0295172	0.86359	0.999827	NS	Nicastrin
ENSMUSG00000003464	Pex19	-0.0593138	6.69538	0.0548747	0.814788	0.999827	NS	Peroxisomal biosis factor 19
ENSMUSG00000003469	Phyhip	0.155462	1.3451	0.0178815	0.893623	0.999827	NS	Phytanoyl-CoA hydroxylase-interacting protein
ENSMUSG00000003476	Crhr2	0.197831	0.335437	0.014713	0.903456	0.999827	NS	Corticotropin-releasing factor receptor 2
ENSMUSG00000003500	Impdh1	0.0846842	7.53036	0.080915	0.776061	0.999827	NS	Inosine-5'-monophosphate dehydrogenase 1
ENSMUSG00000003518	Dusp3	-0.0608927	3.4497	0.0115979	0.914239	0.999827	NS	Dual specificity protein phosphatase 3
ENSMUSG00000003526	Prodh	0.75573	0.265214	0.241789	0.622917	0.999827	NS	Proline dehydrogenase 1, mitochondrial
ENSMUSG00000003527	Dgcr14	0.0385385	4.75887	0.0113933	0.914996	0.999827	NS	protein DGCR14 isoform 2
ENSMUSG00000003528	Slc25a1	0.0879849	6.96063	0.109528	0.740682	0.999827	NS	Tricarboxylate transport protein, mitochondrial
ENSMUSG00000003531	Dgcr6	-0.26859	4.41184	0.399366	0.527417	0.999827	NS
ENSMUSG00000003534	Ddr1	-0.107893	8.02654	0.0971487	0.755279	0.999827	NS	Epithelial discoidin domain-containing receptor 1
ENSMUSG00000003546	Klc4	0.207469	4.70725	0.333456	0.563631	0.999827	NS	Mus musculus kinesin light chain 4 (Klc4), transcript variant 2, mRNA.
ENSMUSG00000003549	Ercc1	0.342347	3.24345	0.313949	0.575267	0.999827	NS	DNA excision repair protein ERCC-1
ENSMUSG00000003559	As3mt	-0.004315	5.68373	0.000194536	0.988872	0.999827	NS	Arsenite methyltransferase
ENSMUSG00000003575	Crtc1	0.0443596	5.6707	0.0270212	0.869431	0.999827	NS	CREB-regulated transcription coactivator 1
ENSMUSG00000003581	Rnf215	-0.442335	3.93403	0.828901	0.362591	0.999827	NS	RING finger protein 215
ENSMUSG00000003604	Aven	0.545351	3.66641	1.07548	0.299712	0.999827	NS	Cell death regulator Aven
ENSMUSG00000003617	Cp	-2.75778	1.49213	4.20905	0.0402089	0.999827	NS	Ceruloplasmin
ENSMUSG00000003623	Crot	-0.458698	5.72838	2.82098	0.0930396	0.999827	NS	Peroxisomal carnitine O-octanoyltransferase
ENSMUSG00000003644	Rps6ka1	0.209122	3.12573	0.109784	0.74039	0.999827	NS	ribosomal protein S6 kinase polypeptide 1
ENSMUSG00000003660	Snrnp200	-0.267753	7.33748	0.746065	0.387725	0.999827	NS	U5 small nuclear ribonucleoprotein 200 kDa helicase
ENSMUSG00000003662	Ciao1	0.0887378	4.5466	0.0557892	0.813279	0.999827	NS	Probable cytosolic iron-sulfur protein assembly protein CIAO1
ENSMUSG00000003680	Taf6l	-0.0722889	4.98487	0.042484	0.8367	0.999827	NS	TATA-box binding protein associated factor 6 like
ENSMUSG00000003721	Insig2	-0.117694	6.22502	0.207512	0.648725	0.999827	NS	Insulin-induced 2 protein
ENSMUSG00000003731	Kpna6	-0.119954	4.29101	0.0599113	0.806636	0.999827	NS	Importin subunit alpha-7
ENSMUSG00000003746	Man1a	-0.0415471	6.21285	0.0252741	0.873686	0.999827	NS	mannosidase 1, alpha
ENSMUSG00000003752	Itpkc	0.286532	3.887	0.259805	0.610254	0.999827	NS	Inositol-trisphosphate 3-kinase C
ENSMUSG00000003762	Coq8b	-0.0659762	4.32391	0.0243336	0.876039	0.999827	NS	coenzyme Q8B
ENSMUSG00000003778	Brd8	-0.153672	7.01104	0.30687	0.579607	0.999827	NS	Bromodomain-containing protein 8
ENSMUSG00000003779	Kif20a	-1.1472	3.33409	3.29216	0.0696116	0.999827	NS	Kinesin-like protein KIF20A
ENSMUSG00000003808	Farsa	0.246481	5.36255	0.686952	0.407203	0.999827	NS	Phenylalanine--tRNA ligase alpha subunit
ENSMUSG00000003809	Gcdh	-0.428582	4.88205	1.51162	0.218892	0.999827	NS	Glutaryl-CoA dehydrogenase, mitochondrial
ENSMUSG00000003810	Mast2	-0.373782	5.57962	1.55511	0.212382	0.999827	NS	microtubule associated serine/threonine kinase 2
ENSMUSG00000003812	Dnase2a	-0.0738213	3.08607	0.0136257	0.907075	0.999827	NS	Deoxyribonuclease-2-alpha
ENSMUSG00000003813	Rad23a	-0.0978017	5.98001	0.134936	0.713368	0.999827	NS	RAD23 homolog A, nucleotide excision repair protein
ENSMUSG00000003814	Calr	0.0841564	9.2901	0.0197599	0.88821	0.999827	NS	Calreticulin
ENSMUSG00000003824	Syce2	0.370725	3.30434	0.397863	0.528195	0.999827	NS	Synaptonemal complex central element protein 2
ENSMUSG00000003847	Nfat5	0.148009	3.99175	0.077352	0.780918	0.999827	NS	nuclear factor of activated T cells 5
ENSMUSG00000003848	Nob1	-0.351868	4.96705	0.964374	0.326087	0.999827	NS	NIN1/RPN12 binding protein 1 homolog
ENSMUSG00000003849	Nqo1	-0.580186	3.24561	0.889718	0.345554	0.999827	NS	NAD(P)H dehydrogenase [quinone] 1
ENSMUSG00000003863	Ppfia3	0.0991717	1.48717	0.00754669	0.930774	0.999827	NS	protein tyrosine phosphatase, receptor type, f polypeptide (PTPRF), interacting protein (liprin), al
ENSMUSG00000003865	Gys1	0.143953	4.0266	0.0643205	0.799793	0.999827	NS	Glycogen [starch] synthase, muscle
ENSMUSG00000003868	Ruvbl2	-0.174412	4.39686	0.182753	0.669018	0.999827	NS	RuvB-like protein 2
ENSMUSG00000003872	Lin7b	-0.240993	0.0563929	0.0234486	0.878296	0.999827	NS	B
ENSMUSG00000003873	Bax	-0.0417455	5.67236	0.0238132	0.877361	0.999827	NS	Apoptosis regulator BAX
ENSMUSG00000003923	Tfam	0.0812011	5.15275	0.0642869	0.799844	0.999827	NS	transcription factor A, mitochondrial
ENSMUSG00000003929	Zfp81	-0.0618128	3.23129	0.00981455	0.921084	0.999827	NS	zinc finger protein 81
ENSMUSG00000003934	Efnb3	0.699916	2.96218	1.1186	0.290219	0.999827	NS	Ephrin-B3
ENSMUSG00000003948	Mmd	0.440559	3.77361	0.608827	0.43523	0.999827	NS	Monocyte to macrophage differentiation factor
ENSMUSG00000003949	Hlf	-0.730075	2.82393	0.956935	0.32796	0.999827	NS	Hepatic leukemia factor
ENSMUSG00000003955	Fam162a	-0.256164	3.3949	0.202386	0.652802	0.999827	NS	Protein FAM162A
ENSMUSG00000003970	Rpl8	0.215902	6.41093	0.666338	0.414331	0.999827	NS	60S ribosomal protein L8
ENSMUSG00000003992	Ssbp2	-0.0414525	5.97646	0.0239285	0.877067	0.999827	NS	Single-stranded DNA-binding protein 2
ENSMUSG00000004018	Fancl	-0.0882583	3.62818	0.0234517	0.878288	0.999827	NS	E3 ubiquitin-protein ligase FANCL
ENSMUSG00000004031	Brinp2	-0.394743	1.3443	0.0547365	0.815017	0.999827	NS	BMP/retinoic acid-inducible neural-specific protein 2
ENSMUSG00000004032	Gstm5	-0.211794	3.98663	0.204477	0.651131	0.999827	NS	Glutathione S-transferase Mu 5
ENSMUSG00000004035	Gstm7	0.545147	2.33307	0.429675	0.512148	0.999827	NS	Glutathione S-transferase Mu 7
ENSMUSG00000004040	Stat3	-0.0724748	8.25395	0.0344404	0.852773	0.999827	NS	Signal transducer and activator of transcription 3
ENSMUSG00000004043	Stat5a	0.583921	4.79261	2.49184	0.114438	0.999827	NS	signal transducer and activator of transcription 5A
ENSMUSG00000004044	Cavin1	-0.581039	2.25448	0.403983	0.52504	0.999827	NS	Caveolae-associated protein 1
ENSMUSG00000004054	Map3k11	-0.226872	5.58594	0.70602	0.400768	0.999827	NS	Mitogen-activated protein kinase kinase kinase 11
ENSMUSG00000004056	Akt2	0.221381	6.72271	0.599264	0.438859	0.999827	NS	Mus musculus thymoma viral proto-onco 2 (Akt2), transcript variant 4, mRNA.
ENSMUSG00000004069	Dnaja3	-0.212522	6.89893	0.666542	0.41426	0.999827	NS	DnaJ homolog subfamily A member 3, mitochondrial
ENSMUSG00000004070	Hmox2	0.00496369	6.21695	0.000297438	0.98624	0.999827	NS	Mus musculus heme oxygenase 2 (Hmox2), transcript variant 3, mRNA.
ENSMUSG00000004071	Cdip1	-0.08304	6.33263	0.0986179	0.753495	0.999827	NS	Mus musculus cell death inducing Trp53 target 1 (Cdip1), transcript variant 5, mRNA.
ENSMUSG00000004085	Map3k20	-0.0274862	2.91729	0.00142257	0.969913	0.999827	NS	Mitogen-activated protein kinase kinase kinase 20
ENSMUSG00000004096	Cwc15	-0.360296	5.36977	1.51864	0.217825	0.999827	NS	Spliceosome-associated
ENSMUSG00000004098	Col5a3	-2.292	0.622383	1.6438	0.199804	0.999827	NS	collagen, type V, alpha 3
ENSMUSG00000004099	Dnmt1	-0.405305	5.69364	2.47149	0.115928	0.999827	NS	DNA (cytosine-5)-methyltransferase 1
ENSMUSG00000004100	Ppan	0.36321	4.74261	0.986384	0.320628	0.999827	NS	Suppressor of SWI4 1 homolog
ENSMUSG00000004105	Angptl2	-2.83588	2.77275	4.30891	0.0379134	0.999827	NS	Angiopoietin-related protein 2
ENSMUSG00000004127	Trmt10a	0.231391	3.50439	0.172419	0.677971	0.999827	NS	tRNA methyltransferase 10A
ENSMUSG00000004187	Kifc2	-1.18107	2.77603	2.64636	0.103787	0.999827	NS	Mus musculus kinesin family member C2 (Kifc2), transcript variant 5, mRNA.
ENSMUSG00000004207	Psap	-0.057014	9.82695	0.00763425	0.930374	0.999827	NS	prosaposin
ENSMUSG00000004221	Ikbkg	-0.24866	4.84859	0.486304	0.485581	0.999827	NS	NF-kappa-B essential modulator
ENSMUSG00000004233	Wars2	-0.533848	2.30782	0.360355	0.548309	0.999827	NS	tryptophanyl tRNA synthetase 2 (mitochondrial)
ENSMUSG00000004263	Atn1	0.631819	2.03882	0.475644	0.490402	0.999827	NS	Atrophin-1
ENSMUSG00000004264	Phb2	0.110872	6.37882	0.196435	0.657614	0.999827	NS	Prohibitin-2
ENSMUSG00000004266	Ptpn6	-0.109817	5.61207	0.168289	0.681637	0.999827	NS	protein tyrosine phosphatase, non-receptor type 6
ENSMUSG00000004267	Eno2	0.393904	4.3084	0.890454	0.345354	0.999827	NS	Gamma-enolase
ENSMUSG00000004268	Emg1	-0.17372	5.12849	0.292446	0.588657	0.999827	NS	Ribosomal RNA small subunit methyltransferase NEP1
ENSMUSG00000004270	Lpcat3	-0.060973	7.03009	0.0475849	0.82732	0.999827	NS	Lysophospholipid acyltransferase 5
ENSMUSG00000004285	Atp6v1f	-0.153134	6.50807	0.359851	0.548589	0.999827	NS	ATPase, H+ transporting, lysosomal V1 subunit F
ENSMUSG00000004317	Clcn5	-0.84677	3.65131	2.47331	0.115794	0.999827	NS	H(+)/Cl(-) exchange transporter 5
ENSMUSG00000004319	Clcn3	-0.00552655	7.1952	0.000379913	0.984449	0.999827	NS	H(+)/Cl(-) exchange transporter 3
ENSMUSG00000004347	Pde1c	-0.929967	3.49419	1.25986	0.261677	0.999827	NS	phosphodiesterase 1C
ENSMUSG00000004356	Utp20	0.389745	4.17724	0.759797	0.383392	0.999827	NS	UTP20 small subunit processome component
ENSMUSG00000004360	9330159F19Rik	0.524938	0.86158	0.12732	0.721227	0.999827	NS	RIKEN cDNA 9330159F19 gene
ENSMUSG00000004364	Cul3	0.32098	6.7642	0.951522	0.329332	0.999827	NS	Cullin-3
ENSMUSG00000004366	Sst	0.980013	10.1215	1.64149	0.200121	0.999827	NS	somatostatin
ENSMUSG00000004393	Ddx56	0.032685	5.76729	0.0137421	0.90668	0.999827	NS	Probable ATP-dependent RNA helicase DDX56
ENSMUSG00000004394	Tmed4	0.124471	7.9837	0.135889	0.712403	0.999827	NS	Transmembrane emp24 domain-containing protein 4
ENSMUSG00000004415	Col26a1	0.721833	0.22569	0.213339	0.644163	0.999827	NS	Mus musculus collagen, type XXVI, alpha 1 (Col26a1), transcript variant 2, mRNA.
ENSMUSG00000004446	Bid	1.11003	3.14963	2.83083	0.0924708	0.999827	NS	BH3-interacting domain death agonist BH3-interacting domain death agonist p15 BH3-interacting domain
ENSMUSG00000004451	Ralb	-0.0831853	5.67301	0.0981063	0.754114	0.999827	NS	Ras-related protein Ral-B
ENSMUSG00000004455	Ppp1cc	0.17697	6.9206	0.452316	0.501237	0.999827	NS	Serine/threonine-protein phosphatase PP1-gamma catalytic subunit
ENSMUSG00000004460	Dnajb11	-0.0934287	7.49858	0.0910032	0.762906	0.999827	NS	DnaJ homolog subfamily B member 11
ENSMUSG00000004462	Tbccd1	-0.517259	5.01101	1.88664	0.169581	0.999827	NS	TBCC domain-containing protein 1
ENSMUSG00000004473	Clec11a	-0.00875196	2.49665	0.000128381	0.99096	0.999827	NS	C-type lectin domain family 11 member A
ENSMUSG00000004500	Zfp324	-0.53723	4.60633	1.73889	0.187279	0.999827	NS	zinc finger protein 324
ENSMUSG00000004530	Coro1c	0.0945864	7.02581	0.108204	0.742198	0.999827	NS	Coronin-1C
ENSMUSG00000004535	Tax1bp1	0.015701	8.0743	0.00190184	0.965215	0.999827	NS	Tax1-binding
ENSMUSG00000004558	Ndrg2	0.75388	3.13525	0.846208	0.357627	0.999827	NS	Protein NDRG2 Protein NDRG2, N-terminally processed
ENSMUSG00000004561	Mettl17	-0.517204	3.2223	0.664427	0.415001	0.999827	NS	Methyltransferase-like protein 17, mitochondrial
ENSMUSG00000004562	Arhgef40	-1.75439	1.7599	2.56669	0.109136	0.999827	NS	Rho guanine nucleotide exchange factor 40
ENSMUSG00000004565	Pnpla6	-0.0581604	4.48764	0.0210304	0.884696	0.999827	NS	Mus musculus patatin-like phospholipase domain containing 6 (Pnpla6), transcript variant 4, mRNA.
ENSMUSG00000004567	Mcoln1	-0.453643	4.92111	1.59288	0.206915	0.999827	NS	Mucolipin-1
ENSMUSG00000004568	Arhgef18	-0.320963	5.21234	1.06025	0.303157	0.999827	NS	Rho guanine nucleotide exchange factor 18
ENSMUSG00000004591	Pkn2	0.253428	6.4563	0.997202	0.317989	0.999827	NS	Serine/threonine-protein kinase N2
ENSMUSG00000004610	Etfb	-0.117373	6.35244	0.212805	0.644578	0.999827	NS	Electron transfer flavoprotein subunit beta
ENSMUSG00000004626	Stxbp2	-0.0862468	6.16318	0.103178	0.748049	0.999827	NS	syntaxin binding protein 2
ENSMUSG00000004631	Sgce	0.555988	3.66149	0.905901	0.341204	0.999827	NS	Epsilon-sarcoglycan
ENSMUSG00000004637	Wwox	0.00133693	4.02955	8.32175e-06	0.997698	0.999827	NS	WW domain-containing oxidoreductase
ENSMUSG00000004642	Slbp	0.168984	5.91879	0.322096	0.570351	0.999827	NS	stem-loop binding protein
ENSMUSG00000004661	Arid3b	0.171296	4.17957	0.0913687	0.762444	0.999827	NS	AT-rich interactive domain-containing protein 3B
ENSMUSG00000004665	Cnn2	-0.443657	3.36368	0.260024	0.610104	0.999827	NS	Calponin-2
ENSMUSG00000004667	Polr2e	0.364236	5.73592	2.02545	0.154683	0.999827	NS	polymerase (RNA) II (DNA directed) polypeptide E
ENSMUSG00000004677	Myo9b	-0.142134	4.07643	0.100569	0.751148	0.999827	NS	myosin IXB
ENSMUSG00000004698	Hdac9	-0.2895	2.28231	0.113698	0.735973	0.999827	NS	histone deacetylase 9
ENSMUSG00000004730	Adgre1	1.139	1.22381	0.821227	0.364822	0.999827	NS	Mus musculus adhesion G protein-coupled receptor E1 (Adgre1), transcript variant 2, mRNA.
ENSMUSG00000004748	Mtfp1	0.313181	4.20325	0.446707	0.503903	0.999827	NS	Mitochondrial fission process protein 1
ENSMUSG00000004768	Rab23	0.155983	4.76664	0.193886	0.659702	0.999827	NS	RAB23, member RAS oncogene family
ENSMUSG00000004771	Rab11a	-0.0128997	7.75406	0.00155339	0.968561	0.999827	NS	RAB11A, member RAS oncogene family
ENSMUSG00000004788	Eif2b2	0.297323	5.69189	1.25877	0.261883	0.999827	NS	Translation initiation factor eIF-2B subunit beta
ENSMUSG00000004789	Dlst	-0.128012	6.79178	0.246539	0.619522	0.999827	NS	Dihydrolipoyllysine-residue succinyltransferase component of 2-oxoglutarate dehydrogenase complex, m
ENSMUSG00000004798	Ulk2	-0.102803	5.74414	0.144169	0.704171	0.999827	NS	unc-51 like kinase 2
ENSMUSG00000004815	Dgkq	0.255198	3.50217	0.186722	0.665659	0.999827	NS	Diacylglycerol kinase theta
ENSMUSG00000004843	Chmp2b	-0.0173109	5.62236	0.00395531	0.949853	0.999827	NS	Charged multivesicular body protein 2b
ENSMUSG00000004846	Plod3	0.371229	4.45538	0.88855	0.345871	0.999827	NS	Procollagen-lysine,2-oxoglutarate 5-dioxygenase 3
ENSMUSG00000004849	Ap1s1	-0.0450602	6.31056	0.0316908	0.858708	0.999827	NS	AP-1 complex subunit sigma-1A
ENSMUSG00000004864	Mapk13	0.652297	1.85787	0.416117	0.518881	0.999827	NS	Mitogen-activated protein kinase 13
ENSMUSG00000004865	Srpk1	0.0374135	4.81781	0.0114338	0.914845	0.999827	NS	SRSF protein kinase 1
ENSMUSG00000004880	Lbr	-0.188293	5.8725	0.415563	0.519159	0.999827	NS	Lamin-B receptor
ENSMUSG00000004895	Prcc	-0.315195	3.10116	0.230808	0.630925	0.999827	NS	papillary renal cell carcinoma (translocation-associated)
ENSMUSG00000004896	Rrnad1	0.0489065	3.35466	0.00705872	0.933044	0.999827	NS	ribosomal RNA adenine dimethylase domain containing 1
ENSMUSG00000004897	Hdgf	-0.0735524	7.30263	0.0629331	0.801919	0.999827	NS	Hepatoma-derived growth factor
ENSMUSG00000004929	Thop1	0.234458	4.60039	0.373236	0.541246	0.999827	NS	thimet oligopeptidase 1
ENSMUSG00000004931	Apba3	0.160042	3.96408	0.115449	0.734024	0.999827	NS	Amyloid-beta A4 protein-binding family A member 3
ENSMUSG00000004933	Matk	0.525285	1.33181	0.2137	0.643883	0.999827	NS	megakaryocyte-associated tyrosine kinase
ENSMUSG00000004934	Pias4	-0.114557	4.61279	0.0852298	0.770331	0.999827	NS	protein inhibitor of activated STAT 4
ENSMUSG00000004936	Map2k1	-0.0786628	6.21336	0.0858894	0.769469	0.999827	NS	Dual specificity mitogen-activated protein kinase kinase 1
ENSMUSG00000004937	Sgta	0.0274659	6.69928	0.0106061	0.917974	0.999827	NS	small glutamine-rich tetratricopeptide repeat (TPR)-containing, alpha
ENSMUSG00000004945	Tmem242	0.220865	3.91229	0.158911	0.690161	0.999827	NS	Transmembrane protein 242
ENSMUSG00000004947	Dtx2	0.00768502	3.26692	0.000164777	0.989758	0.999827	NS	Probable E3 ubiquitin-protein ligase DTX2
ENSMUSG00000004951	Hspb1	0.171461	1.40066	0.0191865	0.889833	0.999827	NS	Heat shock protein beta-1
ENSMUSG00000004952	Rasa4	0.619919	1.35743	0.245299	0.620405	0.999827	NS	RAS p21 protein activator 4
ENSMUSG00000004961	Syt5	-0.272273	5.07132	0.66685	0.414152	0.999827	NS	Synaptotagmin-5
ENSMUSG00000004980	Hnrnpa2b1	-0.0426545	8.9078	0.00709358	0.932879	0.999827	NS	Heteroous nuclear ribonucleoproteins A2/B1
ENSMUSG00000004994	Ccdc130	0.386489	4.2633	0.826259	0.363357	0.999827	NS	Coiled-coil domain-containing protein 130
ENSMUSG00000004996	Mri1	-0.443052	3.17551	0.500355	0.479344	0.999827	NS	Methylthioribose-1-phosphate isomerase
ENSMUSG00000005034	Prkacb	-0.414166	9.112	0.568641	0.450799	0.999827	NS	protein kinase, cAMP dependent, catalytic, beta
ENSMUSG00000005043	Sgsh	-0.342899	3.22346	0.290747	0.589743	0.999827	NS	N-sulfoglucosamine sulfohydrolase (sulfamidase)
ENSMUSG00000005045	Chd5	1.01601	1.76963	0.910828	0.339895	0.999827	NS	Chromodomain-helicase-DNA-binding protein 5
ENSMUSG00000005054	Cstb	0.163644	4.98499	0.204861	0.650826	0.999827	NS	Cystatin-B
ENSMUSG00000005069	Pex5	-0.319681	5.46057	1.22718	0.267956	0.999827	NS	Peroxisomal targeting signal 1 receptor
ENSMUSG00000005078	Jkamp	0.105612	4.89223	0.0841264	0.771781	0.999827	NS	JNK1/MAPK8-associated membrane protein
ENSMUSG00000005087	Cd44	0.501162	5.55075	2.81712	0.0932635	0.999827	NS	CD44 molecule (Indian blood group)
ENSMUSG00000005102	Eif2ak4	0.231072	4.59826	0.332434	0.56423	0.999827	NS	eIF-2-alpha kinase GCN2
ENSMUSG00000005103	Wdr1	0.119075	7.67808	0.132923	0.71542	0.999827	NS	WD repeat domain 1
ENSMUSG00000005107	Slc2a9	0.288557	1.09164	0.0495724	0.823809	0.999827	NS	solute carrier family 2 (facilitated glucose transporter), member 9
ENSMUSG00000005124	Wisp1	-0.0473118	0.499888	0.000640608	0.979808	0.999827	NS	WNT1 inducible signaling pathway protein 1
ENSMUSG00000005125	Ndrg1	0.328996	7.84498	0.921283	0.337138	0.999827	NS	Protein NDRG1
ENSMUSG00000005131	4930550C14Rik	-0.041176	3.60668	0.00590359	0.938755	0.999827	NS	Uncharacterized
ENSMUSG00000005142	Man2b1	0.0661245	6.13287	0.0561635	0.812666	0.999827	NS	Lysosomal alpha-mannosidase
ENSMUSG00000005150	Wdr83	-0.183752	3.24724	0.0697355	0.791722	0.999827	NS	WD repeat domain containing 83
ENSMUSG00000005161	Prdx2	0.0534504	7.25932	0.0341773	0.85333	0.999827	NS	Peroxiredoxin-2
ENSMUSG00000005198	Polr2a	0.033498	5.87945	0.0157563	0.900109	0.999827	NS	DNA-directed RNA polymerase II subunit RPB1
ENSMUSG00000005204	Senp3	-0.0424332	4.3102	0.0100218	0.920258	0.999827	NS	Sentrin-specific protease 3
ENSMUSG00000005225	Plekha8	-0.114131	4.04702	0.0606208	0.805517	0.999827	NS	Pleckstrin homology domain-containing family A member 8
ENSMUSG00000005232	G6pc2	-0.339535	10.1738	0.223881	0.636099	0.999827	NS	Glucose-6-phosphatase 2
ENSMUSG00000005233	Spc25	-0.325067	6.21969	0.938988	0.332538	0.999827	NS	Kinetochore protein Spc25
ENSMUSG00000005237	Dnah2	-1.13292	0.735518	0.416498	0.51869	0.999827	NS	Dynein heavy chain 2, axonemal
ENSMUSG00000005251	Ripk4	0.261793	6.60804	1.07935	0.298842	0.999827	NS	Receptor-interacting serine/threonine-protein kinase 4
ENSMUSG00000005262	Ufd1	-0.0991818	6.53288	0.154554	0.69422	0.999827	NS	ubiquitin recognition factor in ER-associated degradation 1
ENSMUSG00000005267	Zfp287	0.102253	3.95218	0.0415729	0.838436	0.999827	NS	zinc finger protein 287
ENSMUSG00000005268	Prlr	-0.382731	6.82413	1.90273	0.167773	0.999827	NS	prolactin receptor
ENSMUSG00000005299	Letm1	-0.206183	6.29949	0.604465	0.436879	0.999827	NS	Mitochondrial proton/calcium exchanger protein
ENSMUSG00000005312	Ubqln1	0.000547891	7.56184	3.24005e-06	0.998564	0.999827	NS	ubiquilin 1
ENSMUSG00000005320	Fgfr4	0.455539	2.61461	0.311024	0.577052	0.999827	NS	fibroblast growth factor receptor 4
ENSMUSG00000005354	Txn2	-0.114572	5.99567	0.17881	0.672398	0.999827	NS	thioredoxin 2
ENSMUSG00000005362	Crbn	0.143877	5.90905	0.290726	0.589755	0.999827	NS	Protein cereblon
ENSMUSG00000005370	Msh6	-0.0950521	5.47742	0.11846	0.73071	0.999827	NS	DNA mismatch repair protein Msh6
ENSMUSG00000005371	Fbxo11	0.336873	4.06706	0.552783	0.457183	0.999827	NS	Mus musculus F-box protein 11 (Fbxo11), transcript variant 2, mRNA.
ENSMUSG00000005373	Mlxipl	-0.156925	8.1037	0.191275	0.661858	0.999827	NS	Carbohydrate-responsive element-binding protein
ENSMUSG00000005374	Tbl2	-0.177541	6.77031	0.35855	0.549313	0.999827	NS	Transducin beta-like protein 2
ENSMUSG00000005378	Bud23	-0.00811566	4.80625	0.000528671	0.981656	0.999827	NS	Probable 18S rRNA (guanine-N(7))-methyltransferase
ENSMUSG00000005397	Nid1	-0.654179	5.11038	1.04638	0.306342	0.999827	NS	Nidogen-1
ENSMUSG00000005410	Mcm5	-0.473086	4.35897	1.18623	0.276092	0.999827	NS	minichromosome maintenance complex component 5
ENSMUSG00000005413	Hmox1	0.596876	2.01696	0.405682	0.524169	0.999827	NS	Heme oxygenase 1
ENSMUSG00000005417	Mprip	-0.0270986	7.00729	0.00974197	0.921375	0.999827	NS	Myosin phosphatase Rho-interacting protein
ENSMUSG00000005442	Cic	-0.061921	2.88512	0.00844053	0.926799	0.999827	NS	capicua transcriptional repressor
ENSMUSG00000005447	Pafah1b3	0.250796	3.77339	0.248259	0.618303	0.999827	NS	Platelet-activating factor acetylhydrolase IB subunit gamma
ENSMUSG00000005469	Prkaca	-0.017383	7.06882	0.00405083	0.949252	0.999827	NS	protein kinase, cAMP dependent, catalytic, alpha
ENSMUSG00000005470	Asf1b	-0.396731	2.98065	0.338911	0.560459	0.999827	NS	Histone chaperone ASF1B
ENSMUSG00000005481	Ddx39	-0.332908	4.89959	0.803605	0.370018	0.999827	NS	ATP-dependent RNA helicase DDX39A
ENSMUSG00000005483	Dnajb1	0.353354	6.12693	1.42347	0.232833	0.999827	NS	DnaJ homolog subfamily B member 1
ENSMUSG00000005505	Kbtbd4	-0.342404	4.98658	0.563475	0.452863	0.999827	NS	Kelch repeat and BTB domain-containing protein 4
ENSMUSG00000005506	Celf1	0.101354	6.98229	0.144246	0.704096	0.999827	NS	CUGBP Elav-like family member 1
ENSMUSG00000005510	Ndufs3	-0.0387552	6.23203	0.0216015	0.883152	0.999827	NS	NADH dehydrogenase [ubiquinone] iron-sulfur protein 3, mitochondrial
ENSMUSG00000005514	Por	-0.186227	8.1113	0.270984	0.602672	0.999827	NS	P450 (cytochrome) oxidoreductase
ENSMUSG00000005533	Igf1r	0.0596943	5.05877	0.0289509	0.864892	0.999827	NS	insulin like growth factor 1 receptor
ENSMUSG00000005534	Insr	0.281652	4.80879	0.5961	0.44007	0.999827	NS	Insulin receptor Insulin receptor subunit alpha Insulin receptor subunit beta
ENSMUSG00000005553	Atp4a	-0.27278	2.59911	0.128431	0.720064	0.999827	NS	ATPase H+/K+ transporting alpha subunit
ENSMUSG00000005566	Trim28	0.46491	6.38589	3.31566	0.0686228	0.999827	NS	tripartite motif-containing 28
ENSMUSG00000005575	Ube2m	0.144404	4.99158	0.17654	0.674364	0.999827	NS	ubiquitin-conjugating enzyme E2M
ENSMUSG00000005580	Adcy9	-0.21921	3.6755	0.163377	0.686066	0.999827	NS	Adenylate cyclase type 9
ENSMUSG00000005583	Mef2c	0.652936	2.7649	0.749201	0.386729	0.999827	NS	Mus musculus myocyte enhancer factor 2C (Mef2c), transcript variant 14, mRNA.
ENSMUSG00000005609	Ctr9	0.180381	6.84658	0.492906	0.482634	0.999827	NS	RNA polymerase-associated
ENSMUSG00000005610	Eif4g2	-0.143301	10.0599	0.0426426	0.8364	0.999827	NS	eukaryotic translation initiation factor 4 gamma 2 isoform 2
ENSMUSG00000005615	Pcyt1a	-0.481473	5.30963	2.32077	0.127656	0.999827	NS	Choline-phosphate cytidylyltransferase A
ENSMUSG00000005621	Zfp592	0.0807038	5.9479	0.0942032	0.7589	0.999827	NS	zinc finger protein 592
ENSMUSG00000005625	Psmd4	0.134659	6.49024	0.289607	0.590472	0.999827	NS	26S proteasome non-ATPase regulatory subunit 4
ENSMUSG00000005640	Insrr	-0.540099	8.47519	1.62719	0.202092	0.999827	NS	Insulin receptor-related protein Insulin receptor-related protein alpha chain Insulin receptor-relat
ENSMUSG00000005656	Snx6	-0.141257	6.62126	0.319518	0.571897	0.999827	NS	Sorting nexin-6 Sorting nexin-6, N-terminally processed
ENSMUSG00000005667	Mthfd2	-0.218278	4.51678	0.258452	0.611186	0.999827	NS	Bifunctional methylenetetrahydrofolate dehydrogenase/cyclohydrolase, mitochondrial NAD-dependent met
ENSMUSG00000005672	Kit	0.714101	4.32019	2.9119	0.0879282	0.999827	NS	Mast/stem cell growth factor receptor Kit
ENSMUSG00000005674	Tomm40l	-0.542744	4.35542	1.63793	0.200609	0.999827	NS	Mitochondrial import receptor subunit TOM40B
ENSMUSG00000005682	Pan2	-0.547223	4.52081	1.59558	0.20653	0.999827	NS	PAN2-PAN3 deadenylation complex catalytic subunit Pan2
ENSMUSG00000005683	Cs	0.125108	7.00214	0.218328	0.640317	0.999827	NS	Citrate synthase, mitochondrial
ENSMUSG00000005687	Bcas2	0.00413187	6.29294	0.000248723	0.987417	0.999827	NS	breast carcinoma amplified sequence 2
ENSMUSG00000005698	Ctcf	0.232792	6.37091	0.818944	0.365489	0.999827	NS	Mus musculus CCCTC-binding factor (Ctcf), transcript variant 2, mRNA.
ENSMUSG00000005699	Pard6a	0.477096	4.11438	0.987128	0.320445	0.999827	NS	Partitioning defective 6 homolog alpha
ENSMUSG00000005732	Ranbp1	0.00690277	6.48278	0.000759066	0.97802	0.999827	NS	Ran-specific GTPase-activating protein
ENSMUSG00000005774	Rfx5	-0.783916	4.288	3.34926	0.0672352	0.999827	NS	Mus musculus regulatory factor X, 5 (influences HLA class II expression) (Rfx5), transcript variant
ENSMUSG00000005779	Psmb4	-0.0996181	6.15036	0.144875	0.703482	0.999827	NS	Proteasome subunit beta type-4
ENSMUSG00000005802	Slc30a4	0.0702022	4.93575	0.0404072	0.840687	0.999827	NS	Zinc transporter 4
ENSMUSG00000005803	Sqor	0.13865	5.68261	0.280167	0.596592	0.999827	NS	Sulfide:quinone oxidoreductase, mitochondrial
ENSMUSG00000005804	Bloc1s6	-0.283936	4.71218	0.569889	0.450303	0.999827	NS	Biosis of lysosome-related organelles complex 1 subunit 6
ENSMUSG00000005813	Metap1	0.0548819	5.87869	0.0378491	0.845746	0.999827	NS	Methionine aminopeptidase 1
ENSMUSG00000005823	Gpr108	0.0778515	5.92497	0.0862146	0.769046	0.999827	NS	G protein-coupled receptor 108
ENSMUSG00000005836	Gata6	0.0683373	4.73953	0.0264771	0.870741	0.999827	NS	Transcription factor GATA-6
ENSMUSG00000005846	Rsl1d1	0.189196	6.47371	0.544384	0.460621	0.999827	NS	Ribosomal L1 domain-containing protein 1
ENSMUSG00000005871	Apc	-0.157024	6.13118	0.306686	0.579721	0.999827	NS	APC, WNT signaling pathway regulator
ENSMUSG00000005873	Reep5	0.322915	6.16153	1.43169	0.231489	0.999827	NS	receptor accessory protein 5
ENSMUSG00000005881	Ergic3	0.137539	6.90395	0.271568	0.602282	0.999827	NS	Mus musculus ERGIC and golgi 3 (Ergic3), transcript variant 2, mRNA.
ENSMUSG00000005882	Uqcc1	-0.207904	5.7177	0.659219	0.416836	0.999827	NS	ubiquinol-cytochrome c reductase complex assembly factor 1
ENSMUSG00000005886	Ncoa2	0.269773	6.29752	1.04517	0.306622	0.999827	NS	Nuclear receptor coactivator 2
ENSMUSG00000005893	Nr2c2	-0.0273413	6.05917	0.0108395	0.91708	0.999827	NS	nuclear receptor subfamily 2, group C, member 2
ENSMUSG00000005897	Nr2c1	-0.606419	3.68148	1.35216	0.244901	0.999827	NS	Nuclear receptor subfamily 2 group C member 1
ENSMUSG00000005899	Smpd4	0.407122	4.30609	0.913385	0.339218	0.999827	NS	sphingomyelin phosphodiesterase 4
ENSMUSG00000005907	Pex1	-0.330972	4.21968	0.601006	0.438194	0.999827	NS	Peroxisome biosis factor 1
ENSMUSG00000005936	Kctd20	0.138311	7.33595	0.218243	0.640382	0.999827	NS	Mus musculus potassium channel tetramerisation domain containing 20 (Kctd20), transcript variant 3,
ENSMUSG00000005949	Ctns	-0.343968	4.53617	0.651838	0.419456	0.999827	NS	Mus musculus cystinosis, nephropathic (Ctns), transcript variant 2, mRNA.
ENSMUSG00000005951	Shpk	-1.14875	3.70972	4.05538	0.0440307	0.999827	NS	Sedoheptulokinase
ENSMUSG00000005958	Ephb3	-2.50977	1.49251	2.53002	0.111699	0.999827	NS	Ephrin type-B receptor 3
ENSMUSG00000005968	Tuft1	0.208856	5.67236	0.485614	0.48589	0.999827	NS	tuftelin 1
ENSMUSG00000005973	Rcn1	0.484355	5.08608	2.25133	0.1335	0.999827	NS	Reticulocalbin-1
ENSMUSG00000005980	Dnase1	-1.43275	0.0184711	0.534889	0.464559	0.999827	NS	Mus musculus deoxyribonuclease I (Dnase1), transcript variant 2, mRNA.
ENSMUSG00000005981	Trap1	-0.218117	5.7481	0.632722	0.426358	0.999827	NS	Heat shock protein 75 kDa, mitochondrial
ENSMUSG00000005982	Naa60	-0.361263	6.638	1.44033	0.230086	0.999827	NS	N-alpha-acetyltransferase 60
ENSMUSG00000005983	1700037C18Rik	0.371877	2.67891	0.252064	0.615625	0.999827	NS	RIKEN cDNA 1700037C18 gene
ENSMUSG00000005986	Ankrd13d	-0.360944	3.00888	0.294576	0.587303	0.999827	NS	Ankyrin repeat domain-containing protein 13D
ENSMUSG00000006005	Tpr	0.273397	6.90559	1.03995	0.307832	0.999827	NS	translocated promoter region, nuclear basket protein
ENSMUSG00000006010	BC003331	-0.256216	5.23887	0.528457	0.467256	0.999827	NS	odr-4 GPCR localization factor homolog
ENSMUSG00000006019	Dhx34	0.130778	4.93377	0.140982	0.707307	0.999827	NS	DExH-box helicase 34
ENSMUSG00000006021	Kptn	-0.176473	2.67174	0.0477342	0.827054	0.999827	NS	kaptin, actin binding protein
ENSMUSG00000006024	Napa	0.00588487	8.58435	0.00017764	0.989366	0.999827	NS	Alpha-soluble NSF attachment protein
ENSMUSG00000006050	Sra1	-0.0258995	6.1594	0.00965128	0.921741	0.999827	NS	Mus musculus amyloid beta (A4) protein-binding, family B, member 3 (Apbb3), transcript variant 2, mR
ENSMUSG00000006057	Atp5g1	0.0908772	6.88983	0.12134	0.727586	0.999827	NS	ATP synthase F(0) complex subunit C1, mitochondrial
ENSMUSG00000006058	Snf8	-0.0847997	4.62115	0.0539787	0.816279	0.999827	NS	Mus musculus SNF8, ESCRT-II complex subunit, homolog (S. cerevisiae) (Snf8), transcript variant 2, m
ENSMUSG00000006095	Tbcb	-0.0941319	5.63044	0.122004	0.726871	0.999827	NS	Tubulin-folding cofactor B
ENSMUSG00000006127	Inpp5k	0.255636	5.61558	0.896749	0.343655	0.999827	NS	inositol polyphosphate 5-phosphatase K
ENSMUSG00000006134	Crkl	0.600648	5.55118	4.72911	0.0296562	0.999827	NS	Crk-like protein
ENSMUSG00000006154	Eps8l1	1.43912	2.58622	3.23148	0.0722355	0.999827	NS	Epidermal growth factor receptor kinase substrate 8-like protein 1
ENSMUSG00000006169	Clint1	-0.143499	7.12743	0.274581	0.600275	0.999827	NS	Mus musculus clathrin interactor 1 (Clint1), transcript variant 2, mRNA.
ENSMUSG00000006191	Cdkal1	0.0731236	4.74053	0.037568	0.846313	0.999827	NS	Threonylcarbamoyladenosine tRNA methylthiotransferase
ENSMUSG00000006205	Htra1	-0.173008	2.20237	0.0141658	0.905259	0.999827	NS	Serine protease HTRA1
ENSMUSG00000006215	Zbtb17	0.605001	4.66126	2.41752	0.119984	0.999827	NS	zinc finger and BTB domain containing 17
ENSMUSG00000006219	Fblim1	-2.21073	1.13041	2.99101	0.0837277	0.999827	NS	Filamin-binding LIM protein 1
ENSMUSG00000006241	Ccdc159	-0.209597	1.89657	0.0450436	0.831924	0.999827	NS	Coiled-coil domain-containing protein 159
ENSMUSG00000006262	Mob1b	0.543462	4.62822	1.95904	0.161616	0.999827	NS	MOB kinase activator 1B
ENSMUSG00000006273	Atp6v1b2	-0.281579	8.68863	0.365388	0.545529	0.999827	NS	V-type proton ATPase subunit B, brain isoform
ENSMUSG00000006276	Eps15l1	0.229311	5.07998	0.491164	0.483408	0.999827	NS	Epidermal growth factor receptor substrate 15-like 1
ENSMUSG00000006281	Tep1	0.441291	3.70064	0.652924	0.419069	0.999827	NS	Telomerase protein component 1
ENSMUSG00000006288	Ttc5	-0.619216	5.3139	4.21656	0.0400313	0.999827	NS	tetratricopeptide repeat domain 5
ENSMUSG00000006289	Osgep	-0.159673	4.71512	0.193915	0.659678	0.999827	NS	O-sialoglycoprotein endopeptidase
ENSMUSG00000006299	Aamp	-0.123402	7.31734	0.170338	0.679812	0.999827	NS	angio-associated migratory protein
ENSMUSG00000006301	Tmbim1	0.103399	5.99682	0.160842	0.688383	0.999827	NS	transmembrane BAX inhibitor motif containing 1
ENSMUSG00000006304	Arpc2	0.100047	7.67548	0.101232	0.750356	0.999827	NS	Mus musculus actin related protein 2/3 complex, subunit 2 (Arpc2), transcript variant 2, mRNA.
ENSMUSG00000006307	Kmt2b	0.295757	2.9956	0.204291	0.651279	0.999827	NS	Histone-lysine N-methyltransferase 2B
ENSMUSG00000006315	Tmem147	-0.249273	5.21829	0.639825	0.423774	0.999827	NS	transmembrane protein 147
ENSMUSG00000006333	Rps9	0.286643	6.55395	1.18976	0.275378	0.999827	NS	40S ribosomal protein S9
ENSMUSG00000006335	Tfpt	0.0217151	3.16965	0.00119006	0.972481	0.999827	NS	TCF3 fusion partner homolog
ENSMUSG00000006342	Susd2	-0.968942	2.18516	0.816346	0.366251	0.999827	NS	Sushi domain-containing protein 2
ENSMUSG00000006356	Crip2	-0.052161	3.35892	0.0065889	0.935305	0.999827	NS	Cysteine-rich protein 2
ENSMUSG00000006360	Crip1	0.450194	4.22682	0.577958	0.447114	0.999827	NS	Cysteine-rich protein 1
ENSMUSG00000006362	Cbfa2t3	-0.129477	5.52884	0.183553	0.668337	0.999827	NS	Protein CBFA2T3
ENSMUSG00000006369	Fbln1	-1.04958	3.15337	2.0295	0.154271	0.999827	NS	Mus musculus fibulin 1 (Fbln1), transcript variant 2, mRNA.
ENSMUSG00000006373	Pgrmc1	0.144031	7.76997	0.186243	0.666062	0.999827	NS	progesterone receptor membrane component 1
ENSMUSG00000006378	Gcat	0.0164398	5.52336	0.0034831	0.952938	0.999827	NS	2-amino-3-ketobutyrate coenzyme A ligase, mitochondrial
ENSMUSG00000006390	Elovl1	-0.449166	4.75307	1.58161	0.208528	0.999827	NS	Elongation of very long chain fatty acids protein 1
ENSMUSG00000006392	Med8	-0.0618621	4.65214	0.0297972	0.862951	0.999827	NS	mediator complex subunit 8
ENSMUSG00000006395	Hyi	-0.0404245	3.82961	0.00651263	0.93568	0.999827	NS	hydroxypyruvate isomerase (putative)
ENSMUSG00000006398	Cdc20	-1.26866	3.26282	2.91977	0.0875003	0.999827	NS	Cell division cycle
ENSMUSG00000006403	Adamts4	-1.16506	0.532819	0.40556	0.524231	0.999827	NS	A disintegrin and metalloproteinase with thrombospondin motifs 4
ENSMUSG00000006411	Nectin4	-0.83764	1.96847	0.739259	0.389898	0.999827	NS	Nectin-4
ENSMUSG00000006412	Pfdn2	-0.0864489	5.53671	0.100952	0.75069	0.999827	NS	Prefoldin subunit 2
ENSMUSG00000006418	Rnf114	-0.0088	6.29597	0.000671352	0.979329	0.999827	NS	E3 ubiquitin-protein ligase RNF114
ENSMUSG00000006423	C330007P06Rik	0.14826	5.42601	0.235333	0.627597	0.999827	NS	UPF0428
ENSMUSG00000006435	Neurl1a	-0.157003	5.60124	0.322402	0.570168	0.999827	NS	E3 ubiquitin-protein ligase NEURL1
ENSMUSG00000006442	Srm	-0.125138	5.85455	0.170644	0.67954	0.999827	NS	spermidine synthase
ENSMUSG00000006456	Rbm14	0.458012	5.24409	2.10696	0.14663	0.999827	NS	RNA-binding protein 14
ENSMUSG00000006457	Actn3	-0.00612098	2.17087	4.8611e-05	0.994437	0.999827	NS	Alpha-actinin-3
ENSMUSG00000006463	Zdhhc24	-0.751301	4.70806	3.72495	0.0536051	0.999827	NS	zinc finger, DHHC domain containing 24
ENSMUSG00000006464	Bbs1	0.144339	4.92263	0.146947	0.70147	0.999827	NS	Bardet-Biedl syndrome 1 protein homolog
ENSMUSG00000006471	Ndor1	-0.0645613	4.44324	0.0270341	0.8694	0.999827	NS	NADPH-dependent diflavin oxidoreductase 1
ENSMUSG00000006476	Nsmf	-0.409894	5.35651	1.86077	0.172536	0.999827	NS	NMDA receptor synaptonuclear signaling and neuronal migration factor
ENSMUSG00000006494	Pdk1	-0.20738	5.28768	0.322721	0.569977	0.999827	NS	[Pyruvate dehydrogenase (acetyl-transferring)] kinase isozyme 1, mitochondrial
ENSMUSG00000006498	Ptbp1	-0.0277437	7.632	0.00805303	0.928495	0.999827	NS	polypyrimidine tract binding protein 1
ENSMUSG00000006517	Mvd	0.215712	3.45187	0.130721	0.717685	0.999827	NS	mevalonate (diphospho) decarboxylase
ENSMUSG00000006519	Cyba	0.814188	1.54591	0.498316	0.480241	0.999827	NS	Cytochrome b-245 light chain
ENSMUSG00000006526	Tmem110	0.00361419	3.1622	2.95364e-05	0.995664	0.999827	NS	Store-operated calcium entry regulator STIMATE
ENSMUSG00000006527	Sfmbt1	0.236679	5.37306	0.6021	0.437778	0.999827	NS	Scm-like with four MBT domains protein 1
ENSMUSG00000006529	Itih1	-0.871256	3.77803	2.8633	0.0906216	0.999827	NS	Inter-alpha-trypsin inhibitor heavy chain H1
ENSMUSG00000006546	Cryba2	-0.46607	4.60823	1.16718	0.279981	0.999827	NS	Beta-crystallin A2
ENSMUSG00000006575	Rundc3a	-0.167123	7.08085	0.367596	0.544317	0.999827	NS	RUN domain-containing protein 3A
ENSMUSG00000006576	Slc4a3	-0.787984	4.10808	2.06609	0.150607	0.999827	NS	solute carrier family 4 (anion exchanger), member 3
ENSMUSG00000006585	Cdt1	-0.0710383	2.33996	0.00548186	0.940979	0.999827	NS	DNA replication factor Cdt1
ENSMUSG00000006586	Runx1t1	-0.111112	6.26913	0.173006	0.677454	0.999827	NS	runt-related transcription factor 1
ENSMUSG00000006589	Aprt	-0.243255	4.0106	0.267879	0.604758	0.999827	NS	Adenine phosphoribosyltransferase
ENSMUSG00000006599	Gtf2h1	0.385484	5.40425	1.83225	0.175862	0.999827	NS	general transcription factor IIH subunit 1
ENSMUSG00000006611	Hfe	-0.212846	3.79995	0.173488	0.67703	0.999827	NS	Hereditary hemochromatosis protein homolog
ENSMUSG00000006638	Abhd1	0.705972	0.491404	0.24036	0.623946	0.999827	NS	abhydrolase domain containing 1
ENSMUSG00000006641	Slc5a6	0.0523768	4.05217	0.0130419	0.909078	0.999827	NS	Sodium-dependent multivitamin transporter
ENSMUSG00000006651	Aplp1	0.136218	10.2634	0.0349544	0.851691	0.999827	NS	amyloid beta precursor like protein 1
ENSMUSG00000006673	Qrich1	-0.109118	7.69993	0.118917	0.730212	0.999827	NS	glutamine rich 1
ENSMUSG00000006675	P4htm	0.0234848	5.13562	0.00499704	0.943645	0.999827	NS	prolyl 4-hydroxylase, transmembrane (endoplasmic reticulum)
ENSMUSG00000006676	Usp19	0.0664846	7.13787	0.0588425	0.808335	0.999827	NS	ubiquitin specific peptidase 19
ENSMUSG00000006678	Pola1	-0.146658	3.6518	0.0759998	0.782793	0.999827	NS	polymerase (DNA directed), alpha 1
ENSMUSG00000006699	Cdc42	0.0044858	8.51746	0.000106813	0.991754	0.999827	NS	Cell division control
ENSMUSG00000006705	Pknox1	-0.30183	5.89649	1.26125	0.261416	0.999827	NS	Homeobox protein PKNOX1
ENSMUSG00000006715	Gmnn	-0.195577	2.65699	0.0689159	0.792922	0.999827	NS	geminin
ENSMUSG00000006717	Acot13	-0.0559037	4.90287	0.0250286	0.874296	0.999827	NS	acyl-CoA thioesterase 13
ENSMUSG00000006720	Zfp184	1.15926	3.26008	2.69573	0.100617	0.999827	NS	zinc finger protein 184 (Kruppel-like)
ENSMUSG00000006728	Cdk4	0.0621393	7.12927	0.0511674	0.821044	0.999827	NS	Cyclin-dependent kinase 4
ENSMUSG00000006731	B4galnt1	-0.173134	1.18265	0.0111345	0.915963	0.999827	NS	Beta-1,4 N-acetylgalactosaminyltransferase 1
ENSMUSG00000006732	Mettl1	0.0967015	4.26587	0.0454008	0.831269	0.999827	NS	tRNA (guanine-N(7)-)-methyltransferase
ENSMUSG00000006736	Tspan31	-0.283053	6.22944	1.11547	0.290896	0.999827	NS	Tetraspanin-31
ENSMUSG00000006740	Kif5b	0.0122837	8.38549	0.000910248	0.975931	0.999827	NS	Kinesin-1 heavy chain
ENSMUSG00000006763	Saal1	0.137974	3.03954	0.0441585	0.833559	0.999827	NS	Protein SAAL1
ENSMUSG00000006782	Cnp	0.257135	4.16875	0.25546	0.613257	0.999827	NS	2',3'-cyclic-nucleotide 3'-phosphodiesterase
ENSMUSG00000006784	Ttc25	0.264201	0.92241	0.0427331	0.836229	0.999827	NS	tetratricopeptide repeat domain 25
ENSMUSG00000006800	Sulf2	-0.0109506	3.52479	0.000365354	0.98475	0.999827	NS	Mus musculus sulfatase 2 (Sulf2), transcript variant 4, mRNA.
ENSMUSG00000006818	Sod2	-9.94521e-05	6.86726	1.4996e-07	0.999691	0.999827	NS	superoxide dismutase 2, mitochondrial
ENSMUSG00000006850	Tmco6	-0.0566689	3.52217	0.00886762	0.924976	0.999827	NS	Transmembrane and coiled-coil domain-containing protein 6
ENSMUSG00000006906	Stambp	0.211036	5.74643	0.602711	0.437546	0.999827	NS	STAM-binding protein
ENSMUSG00000006920	Ezh1	0.0600333	5.82953	0.0378087	0.845828	0.999827	NS	Histone-lysine N-methyltransferase EZH1
ENSMUSG00000006930	Hap1	-0.0744206	8.10687	0.0430461	0.835638	0.999827	NS	Huntingtin-associated protein 1
ENSMUSG00000006931	P3h4	-0.0498168	4.98853	0.0174622	0.89487	0.999827	NS	Endoplasmic reticulum protein SC65
ENSMUSG00000006932	Ctnnb1	0.224752	8.76677	0.21926	0.639604	0.999827	NS	Catenin beta-1
ENSMUSG00000006941	Eif1b	0.425178	5.87324	2.42492	0.119419	0.999827	NS	Eukaryotic translation initiation factor 1b
ENSMUSG00000006958	Chrd	0.683501	2.21938	0.589196	0.44273	0.999827	NS	Mus musculus chordin (Chrd), transcript variant 3, mRNA.
ENSMUSG00000006998	Psmd2	-0.171588	8.33442	0.183209	0.66863	0.999827	NS	proteasome (prosome, macropain) 26S subunit, non-ATPase, 2
ENSMUSG00000007021	Syngr3	-0.049429	1.9975	0.002192	0.962658	0.999827	NS	Synaptogyrin-3
ENSMUSG00000007029	Vars	-0.0613714	6.43919	0.055533	0.813701	0.999827	NS	valyl-tRNA synthetase
ENSMUSG00000007035	Msh5	-0.227295	0.768154	0.0291269	0.864486	0.999827	NS
ENSMUSG00000007036	Abhd16a	-0.0676513	7.08595	0.0585933	0.808733	0.999827	NS	abhydrolase domain containing 16A
ENSMUSG00000007038	Neu1	0.159242	6.29889	0.389338	0.532648	0.999827	NS	neuraminidase 1
ENSMUSG00000007039	Ddah2	-0.854544	2.30145	0.88857	0.345865	0.999827	NS	N(G),N(G)-dimethylarginine dimethylaminohydrolase 2
ENSMUSG00000007041	Clic1	-0.0220119	6.11092	0.00729861	0.931918	0.999827	NS	Chloride intracellular channel protein 1
ENSMUSG00000007050	Lsm2	0.121437	3.12949	0.036841	0.847789	0.999827	NS	LSM2 homolog, U6 small nuclear RNA and mRNA degradation associated
ENSMUSG00000007080	Pole	-0.82312	2.08885	0.620191	0.430976	0.999827	NS	polymerase (DNA directed), epsilon
ENSMUSG00000007097	Atp1a2	-1.05693	2.05359	0.622674	0.430055	0.999827	NS	Sodium/potassium-transporting ATPase subunit alpha-2
ENSMUSG00000007207	Stx1a	0.128705	3.79885	0.0633348	0.801301	0.999827	NS	syntaxin 1A (brain)
ENSMUSG00000007216	Zfp775	-0.751678	2.75832	1.02595	0.311113	0.999827	NS	zinc finger protein 775
ENSMUSG00000007279	Scube2	0.1023	2.79321	0.0169546	0.8964	0.999827	NS	Signal peptide, CUB and EGF-like domain-containing protein 2
ENSMUSG00000007338	Mrpl49	0.249891	4.65613	0.483847	0.486685	0.999827	NS	39S ribosomal protein L49, mitochondrial
ENSMUSG00000007411	Mark3	-0.162528	7.32767	0.303149	0.581915	0.999827	NS	MAP/microtubule affinity-regulating kinase 3
ENSMUSG00000007415	Gatad1	0.220331	3.41934	0.150406	0.698148	0.999827	NS	GATA zinc finger domain-containing protein 1
ENSMUSG00000007440	Pcdha11	-1.00344	1.914	0.459691	0.497769	0.999827	NS	protocadherin alpha 11
ENSMUSG00000007458	M6pr	-0.188185	7.06077	0.470304	0.492847	0.999827	NS	Cation-dependent mannose-6-phosphate receptor
ENSMUSG00000007476	Lrrc8a	0.539694	1.42461	0.22178	0.637687	0.999827	NS	Volume-regulated anion channel subunit LRRC8A
ENSMUSG00000007564	Ppp2r1a	0.167293	8.16019	0.202053	0.653069	0.999827	NS	protein phosphatase 2, regulatory subunit A, alpha
ENSMUSG00000007570	Fance	-0.0241749	3.94077	0.00255095	0.959718	0.999827	NS	Fanconi anemia group E protein isoform 2
ENSMUSG00000007589	Tinf2	-0.0575498	3.40297	0.00875048	0.925471	0.999827	NS	Terf1 (TRF1)-interacting nuclear factor 2
ENSMUSG00000007594	Hapln4	-0.632074	2.61521	0.612451	0.433867	0.999827	NS	Hyaluronan and proteoglycan link protein 4
ENSMUSG00000007603	Dus3l	-0.181785	4.30968	0.188663	0.664032	0.999827	NS
ENSMUSG00000007610	Gtpbp3	-0.566049	3.28195	0.855527	0.354994	0.999827	NS	tRNA modification GTPase GTPBP3, mitochondrial
ENSMUSG00000007613	Tgfbr1	-0.259442	6.80129	0.781229	0.376766	0.999827	NS	transforming growth factor, beta receptor I
ENSMUSG00000007617	Homer1	0.118012	2.82344	0.028285	0.866441	0.999827	NS	Homer protein homolog 1
ENSMUSG00000007646	Rad51c	0.22422	1.72904	0.0459442	0.830277	0.999827	NS	DNA repair 3
ENSMUSG00000007655	Cav1	-0.454884	3.46222	0.398018	0.528115	0.999827	NS	Caveolin-1
ENSMUSG00000007656	Arpp19	0.158087	6.26921	0.357912	0.549668	0.999827	NS	Mus musculus cAMP-regulated phosphoprotein 19 (Arpp19), transcript variant 6, mRNA.
ENSMUSG00000007659	Bcl2l1	0.145372	5.91085	0.284535	0.593744	0.999827	NS	Mus musculus BCL2-like 1 (Bcl2l1), transcript variant 5, mRNA.
ENSMUSG00000007670	Khsrp	-0.126	5.06318	0.14463	0.703721	0.999827	NS	KH-type splicing regulatory protein
ENSMUSG00000007721	Ccdc124	0.119834	4.72156	0.107007	0.743577	0.999827	NS	Coiled-coil domain-containing protein 124
ENSMUSG00000007739	Cct4	0.279531	6.9932	1.01115	0.314628	0.999827	NS	chaperonin containing Tcp1, subunit 4 (delta)
ENSMUSG00000007777	0610009B22Rik	-0.0942581	5.30383	0.0900918	0.76406	0.999827	NS	RIKEN cDNA 0610009B22 gene
ENSMUSG00000007783	Cpt1c	-0.250335	4.24342	0.317529	0.573097	0.999827	NS	Mus musculus carnitine palmitoyltransferase 1c (Cpt1c), transcript variant 3, mRNA.
ENSMUSG00000007812	Zfp655	-0.303542	5.60502	1.28546	0.256887	0.999827	NS	zinc finger protein 655
ENSMUSG00000007815	Rhoa	-0.218694	7.95223	0.429005	0.512478	0.999827	NS	ras homolog family member A
ENSMUSG00000007817	Zmiz1	-0.168615	6.98205	0.394031	0.530188	0.999827	NS	zinc finger, MIZ-type containing 1
ENSMUSG00000007827	Ankrd26	-0.337933	3.7339	0.427444	0.513246	0.999827	NS
ENSMUSG00000007833	Aldh16a1	-0.198774	3.1969	0.101333	0.750235	0.999827	NS	aldehyde dehydrogenase 16 family, member A1
ENSMUSG00000007836	Hnrnpa0	0.023051	2.49693	0.000903091	0.976026	0.999827	NS	Heteroous nuclear ribonucleoprotein A0
ENSMUSG00000007837	Prrg2	0.117548	5.00226	0.117333	0.731945	0.999827	NS	proline-rich Gla (G-carboxyglutamic acid) polypeptide 2
ENSMUSG00000007850	Hnrnph1	-0.00669254	6.8852	0.000597604	0.980497	0.999827	NS	Mus musculus heteroous nuclear ribonucleoprotein H1 (Hnrnph1), transcript variant 1, mRNA.
ENSMUSG00000007867	Ift43	0.209151	2.17883	0.0550683	0.814468	0.999827	NS	Intraflagellar transport
ENSMUSG00000007872	Id3	-0.470516	2.81943	0.277603	0.598276	0.999827	NS	DNA-binding protein inhibitor ID-3
ENSMUSG00000007880	Arid1a	0.346521	5.63755	1.46514	0.226115	0.999827	NS	AT-rich interactive domain-containing protein 1A
ENSMUSG00000007891	Ctsd	0.0568567	8.1918	0.0229401	0.879613	0.999827	NS	cathepsin D
ENSMUSG00000007892	Rplp1	0.0603941	5.41984	0.0425211	0.83663	0.999827	NS	ribosomal protein, large, P1
ENSMUSG00000007908	Hmgcll1	-0.585746	4.5647	2.24884	0.133714	0.999827	NS	3-hydroxymethyl-3-methylglutaryl-CoA lyase, cytoplasmic
ENSMUSG00000007950	Abhd8	0.0998042	5.86475	0.126364	0.722232	0.999827	NS	abhydrolase domain containing 8
ENSMUSG00000007987	Ift22	0.421989	4.70081	1.27718	0.258424	0.999827	NS	Intraflagellar transport
ENSMUSG00000007989	Fzd3	-0.156941	4.68254	0.179608	0.67171	0.999827	NS	Frizzled-3
ENSMUSG00000008035	Mid1ip1	0.389092	6.92125	2.15341	0.142254	0.999827	NS	Mid1 interacting protein 1 (gastrulation specific G12-like (zebrafish))
ENSMUSG00000008036	Ap2s1	0.104863	5.45596	0.142709	0.705602	0.999827	NS	AP-2 complex subunit sigma
ENSMUSG00000008090	Fgfrl1	0.465343	1.0733	0.137775	0.710504	0.999827	NS	Fibroblast growth factor receptor-like 1
ENSMUSG00000008136	Fhl2	0.361286	4.02277	0.622629	0.430072	0.999827	NS	Four and a half LIM domains protein 2
ENSMUSG00000008140	Emc10	-0.152974	6.17282	0.338008	0.560981	0.999827	NS	ER membrane protein complex subunit 10 isoform 2
ENSMUSG00000008153	Clstn3	0.0976306	3.95856	0.0366171	0.848247	0.999827	NS	Mus musculus calsyntenin 3 (Clstn3), transcript variant 2, mRNA.
ENSMUSG00000008167	Fbxw9	0.0543002	4.4095	0.0140789	0.905549	0.999827	NS	F-box and WD repeat domain containing 9
ENSMUSG00000008200	Fnbp4	0.115324	5.07163	0.0957446	0.756997	0.999827	NS	formin binding protein 4
ENSMUSG00000008206	Cers4	-0.285942	2.28433	0.101333	0.750236	0.999827	NS	Ceramide synthase 4
ENSMUSG00000008226	Scrn3	0.0149845	5.66602	0.00231447	0.961629	0.999827	NS	secernin 3
ENSMUSG00000008301	Phax	0.132042	5.52193	0.220929	0.638333	0.999827	NS	phosphorylated adaptor for RNA export
ENSMUSG00000008305	Tle1	0.281325	6.02385	1.0041	0.316321	0.999827	NS	Transducin-like enhancer protein 1
ENSMUSG00000008318	Relt	0.281347	6.32746	1.01716	0.313194	0.999827	NS	RELT tumor necrosis factor receptor
ENSMUSG00000008333	Snrpb2	-0.0303571	3.99665	0.00405185	0.949246	0.999827	NS	U2 small nuclear ribonucleoprotein B''
ENSMUSG00000008348	Ubc	0.456379	10.9852	0.273955	0.600691	0.999827	NS	ubiquitin C
ENSMUSG00000008373	Prpf31	-0.192386	4.64334	0.265195	0.606573	0.999827	NS	U4/U6 small nuclear ribonucleoprotein Prp31
ENSMUSG00000008384	Sertad1	0.828979	5.40674	4.79087	0.028611	0.999827	NS	SERTA domain-containing protein 1
ENSMUSG00000008393	Carhsp1	0.0186585	6.48706	0.00412083	0.948816	0.999827	NS	Calcium-regulated heat stable protein 1
ENSMUSG00000008398	Elk3	0.176404	4.53571	0.189161	0.663616	0.999827	NS	ETS domain-containing protein Elk-3
ENSMUSG00000008429	Herpud2	0.123101	6.18172	0.219959	0.639071	0.999827	NS	Homocysteine-responsive endoplasmic reticulum-resident ubiquitin-like domain member 2 protein
ENSMUSG00000008435	Rdh13	0.576748	3.19804	0.720819	0.395876	0.999827	NS	Retinol dehydrogenase 13
ENSMUSG00000008450	Nutf2	-0.0691673	5.62483	0.0693784	0.792244	0.999827	NS	Nuclear transport factor 2
ENSMUSG00000008475	Arpc5	-0.0661162	8.34154	0.0266464	0.870332	0.999827	NS	Actin-related protein 2/3 complex subunit 5
ENSMUSG00000008489	Elavl2	0.48431	-0.0139251	0.0873834	0.76753	0.999827	NS	Mus musculus ELAV like RNA binding protein 1 (Elavl2), transcript variant 5, mRNA.
ENSMUSG00000008540	Mgst1	-0.113162	1.70242	0.00957769	0.922039	0.999827	NS	Microsomal glutathione S-transferase 1
ENSMUSG00000008575	Nfib	-0.223193	2.78802	0.0683842	0.793704	0.999827	NS	nuclear factor I/B
ENSMUSG00000008601	Rab25	-0.017493	4.80506	0.00249035	0.960199	0.999827	NS	RAB25, member RAS oncogene family
ENSMUSG00000008604	Ubqln4	-0.0261972	4.90236	0.00562209	0.94023	0.999827	NS	ubiquilin 4
ENSMUSG00000008668	Rps18	0.515853	6.18638	3.41813	0.0644841	0.999827	NS	ribosomal protein S18
ENSMUSG00000008682	Rpl10	0.295855	7.75257	0.826922	0.363164	0.999827	NS	ribosomal protein L10
ENSMUSG00000008683	Rps15a	0.260276	4.31135	0.361479	0.547686	0.999827	NS	40S ribosomal protein S15a
ENSMUSG00000008690	Ncaph2	-0.0018042	6.23251	3.90139e-05	0.995016	0.999827	NS	non-SMC condensin II complex, subunit H2
ENSMUSG00000008730	Hipk1	0.133566	5.43666	0.179843	0.671508	0.999827	NS	Homeodomain-interacting protein kinase 1
ENSMUSG00000008763	Man1a2	-0.00663697	5.81721	0.00061765	0.980173	0.999827	NS	Mannosyl-oligosaccharide 1,2-alpha-mannosidase IB
ENSMUSG00000008822	Acyp1	-0.195191	3.45098	0.115911	0.733513	0.999827	NS	Acylphosphatase-1
ENSMUSG00000008855	Hdac5	-0.126893	6.05413	0.224399	0.635708	0.999827	NS	histone deacetylase 5 isoform 4
ENSMUSG00000008859	Rala	-0.0470607	5.80072	0.0266243	0.870385	0.999827	NS	Ras-related protein Ral-A
ENSMUSG00000008892	Vdac3	0.011952	6.8287	0.00201266	0.964217	0.999827	NS	voltage-dependent anion channel 3
ENSMUSG00000008958	Vps72	0.158708	5.38248	0.289664	0.590436	0.999827	NS	vacuolar protein sorting 72
ENSMUSG00000008976	Gabpa	0.266551	4.84104	0.436915	0.508615	0.999827	NS	GA-binding protein alpha chain
ENSMUSG00000009013	Dynll1	0.488928	6.50457	3.55608	0.0593276	0.999827	NS	Dynein light chain 1, cytoplasmic
ENSMUSG00000009030	Pdcl	-0.391239	6.05678	1.85822	0.172831	0.999827	NS	Phosducin-like protein
ENSMUSG00000009035	Tmem184b	-0.286869	7.11444	1.03622	0.308703	0.999827	NS	Transmembrane protein 184B
ENSMUSG00000009073	Nf2	-0.422473	7.17408	2.15172	0.14241	0.999827	NS	Merlin
ENSMUSG00000009075	Cabp7	-0.355248	7.66907	1.25265	0.263046	0.999827	NS	Calcium-binding protein 7
ENSMUSG00000009076	Zmat5	0.0731032	2.80663	0.0103046	0.919145	0.999827	NS	zinc finger, matrin type 5
ENSMUSG00000009079	Ewsr1	-0.118362	8.54557	0.0737003	0.786023	0.999827	NS	RNA-binding protein EWS
ENSMUSG00000009090	Ap1b1	-0.292992	8.0315	0.717685	0.396904	0.999827	NS	Mus musculus adaptor protein complex AP-1, beta 1 subunit (Ap1b1), transcript variant 4, mRNA.
ENSMUSG00000009092	Derl3	0.244706	3.95506	0.24963	0.617335	0.999827	NS	Mus musculus Der1-like domain family, member 3 (Derl3), transcript variant 2, mRNA.
ENSMUSG00000009108	Gnat2	-0.163472	3.88739	0.107645	0.742841	0.999827	NS	guanine nucleotide binding protein, alpha transducing 2
ENSMUSG00000009112	Bcl2l13	-0.461883	5.8028	2.87712	0.0898464	0.999827	NS	Bcl-2-like protein 13
ENSMUSG00000009207	Lnpk	0.413623	4.02587	0.790835	0.373848	0.999827	NS	lunapark, ER junction formation factor
ENSMUSG00000009210	Prr29	0.466928	3.38081	0.550697	0.458033	0.999827	NS	Proline-rich protein 29
ENSMUSG00000009246	Trpm5	-0.19134	6.47878	0.553114	0.457048	0.999827	NS	Transient receptor potential cation channel subfamily M member 5
ENSMUSG00000009281	Rarres2	0.0127984	1.23542	5.94222e-05	0.99385	0.999827	NS	retinoic acid receptor responder (tazarotene induced) 2
ENSMUSG00000009291	Pttg1ip	-0.0449331	7.61114	0.0212075	0.884215	0.999827	NS	pituitary tumor-transforming 1 interacting protein
ENSMUSG00000009292	Trpm2	-0.578224	3.39766	1.00937	0.315055	0.999827	NS	Transient receptor potential cation channel subfamily M member 2
ENSMUSG00000009293	Ube2g2	-0.0698889	6.37337	0.0674385	0.795103	0.999827	NS	ubiquitin-conjugating enzyme E2G 2
ENSMUSG00000009376	Met	-0.23432	5.12372	0.487601	0.485	0.999827	NS	MET proto-oncogene, receptor tyrosine kinase
ENSMUSG00000009378	Slc16a12	0.0331063	7.97368	0.0096251	0.921847	0.999827	NS	solute carrier family 16 (monocarboxylic acid transporters), member 12
ENSMUSG00000009394	Syn2	-0.544446	5.93631	4.09862	0.0429183	0.999827	NS	Synapsin-2
ENSMUSG00000009406	Elk1	-0.441427	3.48672	0.533912	0.464967	0.999827	NS	ETS domain-containing protein Elk-1
ENSMUSG00000009418	Nav1	0.144838	7.05587	0.256715	0.612386	0.999827	NS	Neuron navigator 1
ENSMUSG00000009470	Tnpo1	-0.0783181	6.10124	0.0839876	0.771965	0.999827	NS	transportin 1
ENSMUSG00000009535	Rnmt	-0.11065	5.11489	0.107335	0.743198	0.999827	NS	RNA (guanine-7-) methyltransferase
ENSMUSG00000009545	Kcnq1	0.86612	4.48069	3.57439	0.058677	0.999827	NS	Potassium voltage-gated channel subfamily KQT member 1
ENSMUSG00000009549	Srp14	-0.0467155	6.52919	0.0344013	0.852856	0.999827	NS	Signal recognition particle 14 kDa protein
ENSMUSG00000009555	Cdk9	-0.0932042	5.99177	0.129542	0.718907	0.999827	NS	Cyclin-dependent kinase 9
ENSMUSG00000009563	Tor2a	-0.14499	5.4661	0.261723	0.608939	0.999827	NS	Torsin-2A
ENSMUSG00000009566	Fpgs	0.0754124	4.2611	0.0286145	0.865672	0.999827	NS	Folylpolyglutamate synthase, mitochondrial
ENSMUSG00000009569	Mkl2	0.0245478	4.38736	0.00359435	0.952193	0.999827	NS	MKL1/myocardin like 2
ENSMUSG00000009575	Cbx5	-0.048561	5.05868	0.0185973	0.891527	0.999827	NS	Mus musculus chromobox 5 (Cbx5), transcript variant 4, mRNA.
ENSMUSG00000009585	Apobec3	0.23968	3.66327	0.153974	0.694766	0.999827	NS	apolipoprotein B mRNA editing enzyme, catalytic polypeptide 3
ENSMUSG00000009614	Sardh	1.81618	1.88862	3.23284	0.0721756	0.999827	NS	sarcosine dehydrogenase
ENSMUSG00000009621	Vav2	0.499767	2.92425	0.506288	0.47675	0.999827	NS	vav 2 oncogene
ENSMUSG00000009630	Ppp2cb	0.146079	5.20405	0.206664	0.649395	0.999827	NS	Serine/threonine-protein phosphatase 2A catalytic subunit beta isoform
ENSMUSG00000009640	Dmap1	0.218504	4.81011	0.387053	0.533853	0.999827	NS	DNA methyltransferase 1-associated protein 1
ENSMUSG00000009647	Mcu	0.456737	4.31829	1.02138	0.312191	0.999827	NS	Calcium uniporter protein, mitochondrial
ENSMUSG00000009670	Tex11	-0.151057	0.108616	0.00598003	0.938361	0.999827	NS	Testis-expressed protein 11
ENSMUSG00000009681	Bcr	0.204567	4.19936	0.229001	0.632266	0.999827	NS	Breakpoint cluster region protein
ENSMUSG00000009687	Fxyd5	0.72649	0.749551	0.286675	0.592359	0.999827	NS	FXYD domain-containing ion transport regulator 5
ENSMUSG00000009731	Kcnd1	-0.376173	3.62326	0.493539	0.482353	0.999827	NS	Potassium voltage-gated channel subfamily D member 1
ENSMUSG00000009733	Tfcp2	-0.352761	3.88843	0.378955	0.538163	0.999827	NS	Mus musculus transcription factor CP2 (Tfcp2), transcript variant 3, mRNA.
ENSMUSG00000009734	Pou6f2	0.965121	0.460555	0.451228	0.501753	0.999827	NS	POU domain, class 6, transcription factor 2
ENSMUSG00000009739	Pou6f1	-0.286422	2.71411	0.120866	0.728097	0.999827	NS	POU domain, class 6, transcription factor 1
ENSMUSG00000009741	Ubp1	-0.239104	5.18245	0.575213	0.448195	0.999827	NS	upstream binding protein 1
ENSMUSG00000009772	Nuak2	-0.111397	5.74849	0.167516	0.682329	0.999827	NS	NUAK family SNF1-like kinase 2
ENSMUSG00000009828	Ick	-0.00658263	2.49868	6.97045e-05	0.993339	0.999827	NS	Serine/threonine-protein kinase ICK
ENSMUSG00000009863	Sdhb	-0.103938	6.62787	0.173888	0.676679	0.999827	NS	Mus musculus succinate dehydrogenase complex, subunit B, iron sulfur (Ip) (Sdhb), transcript variant
ENSMUSG00000009894	Snap47	0.123367	7.20913	0.185042	0.667075	0.999827	NS	Mus musculus synaptosomal-associated protein, 47 (Snap47), transcript variant 1, mRNA.
ENSMUSG00000009905	Kdsr	0.25247	4.14691	0.284937	0.593484	0.999827	NS	3-ketodihydrosphingosine reductase
ENSMUSG00000009907	Vps4b	-0.00582786	7.09381	0.000433214	0.983394	0.999827	NS	vacuolar protein sorting 4B
ENSMUSG00000009927	Rps25	0.509348	6.52685	3.37402	0.066232	0.999827	NS	ribosomal protein S25
ENSMUSG00000009995	Taz	-0.412019	5.47349	1.74146	0.186954	0.999827	NS	tafazzin
ENSMUSG00000010021	Kif19a	-0.0810729	3.69819	0.0243688	0.87595	0.999827	NS	Kinesin-like protein KIF19
ENSMUSG00000010025	Aldh3a2	-0.194318	6.45531	0.46544	0.495093	0.999827	NS	Fatty aldehyde dehydrogenase
ENSMUSG00000010045	Tmem115	0.0515331	5.58046	0.0347159	0.852192	0.999827	NS	transmembrane protein 115
ENSMUSG00000010047	Hyal2	0.150729	4.287	0.130309	0.718112	0.999827	NS	Hyaluronidase-2
ENSMUSG00000010048	Ifrd2	-0.817247	1.88061	0.692633	0.40527	0.999827	NS	interferon related developmental regulator 2
ENSMUSG00000010051	Hyal1	-2.03954	1.49514	3.02766	0.0818557	0.999827	NS	Mus musculus hyaluronoglucosaminidase 1 (Hyal1), transcript variant 2, mRNA.
ENSMUSG00000010054	Tusc2	-0.0633273	5.13703	0.0374838	0.846483	0.999827	NS	tumor suppressor candidate 2
ENSMUSG00000010057	Nprl2	-0.701546	4.45355	3.21807	0.0728294	0.999827	NS	GATOR complex protein NPRL2
ENSMUSG00000010064	Slc38a3	3.19234	2.58704	3.47651	0.0622457	0.999827	NS	Sodium-coupled neutral amino acid transporter 3
ENSMUSG00000010067	Rassf1	0.448258	5.0329	1.45623	0.227531	0.999827	NS	Ras association (RalGDS/AF-6) domain family member 1
ENSMUSG00000010080	Epn3	1.44934	1.01319	0.876769	0.349088	0.999827	NS	Epsin-3
ENSMUSG00000010086	Rnf112	0.091507	1.99529	0.00956929	0.922073	0.999827	NS	RING finger protein 112
ENSMUSG00000010095	Slc3a2	0.151304	8.03389	0.191059	0.662037	0.999827	NS	solute carrier family 3 (activators of dibasic and neutral amino acid transport), member 2
ENSMUSG00000010097	Nxf1	0.306562	6.52624	1.45619	0.227538	0.999827	NS	Nuclear RNA export factor 1
ENSMUSG00000010110	Stx5a	-0.0740387	6.5946	0.0743524	0.785102	0.999827	NS	Syntaxin-5
ENSMUSG00000010154	Spire2	0.44727	4.20761	1.03718	0.308478	0.999827	NS	2
ENSMUSG00000010175	Prox1	0.486497	5.88862	2.45429	0.117204	0.999827	NS	Prospero homeobox protein 1
ENSMUSG00000010205	Raver1	0.0364776	5.09413	0.012873	0.909667	0.999827	NS	ribonucleoprotein, PTB-binding 1
ENSMUSG00000010277	2610507B11Rik	-0.127859	7.04584	0.174094	0.676498	0.999827	NS	Protein KIAA0100
ENSMUSG00000010290	AI597479	-0.389554	4.96415	1.25272	0.263033	0.999827	NS	Ashwin
ENSMUSG00000010307	Tmem86a	0.0183203	4.82025	0.0021274	0.963212	0.999827	NS	Lysoplasmalogenase-like protein TMEM86A
ENSMUSG00000010358	Ifi35	-0.527481	4.0792	1.40264	0.236281	0.999827	NS	Interferon-induced 35 kDa protein homolog
ENSMUSG00000010362	Rdm1	0.991758	2.0573	1.16655	0.280111	0.999827	NS	RAD52 motif-containing protein 1
ENSMUSG00000010376	Nedd8	-0.0799118	5.76215	0.0856166	0.769826	0.999827	NS	NEDD8
ENSMUSG00000010392	Gosr1	-0.297675	6.48723	1.36807	0.242144	0.999827	NS	golgi SNAP receptor complex member 1
ENSMUSG00000010406	Mrpl52	0.126577	3.59573	0.0556242	0.813551	0.999827	NS	39S ribosomal protein L52, mitochondrial
ENSMUSG00000010453	Kansl3	-0.0457489	5.65693	0.0277781	0.867632	0.999827	NS	KAT8 regulatory NSL complex subunit 3
ENSMUSG00000010492	Uckl1os	0.14636	0.0300653	0.00804066	0.92855	0.999827	NS	uridine-cytidine kinase 1-like 1, opposite strand
ENSMUSG00000010505	Myt1	0.231429	6.27031	0.820633	0.364995	0.999827	NS	Myelin transcription factor 1
ENSMUSG00000010517	Faf1	0.427713	6.81795	2.68619	0.101221	0.999827	NS	FAS-associated factor 1
ENSMUSG00000010554	Mettl16	-0.50638	4.97285	2.02374	0.154857	0.999827	NS	U6 small nuclear RNA (adenine-(43)-N(6))-methyltransferase
ENSMUSG00000010592	Dazl	1.74756	0.0692166	1.16184	0.281084	0.999827	NS	Deleted in azoospermia-like
ENSMUSG00000010607	Pigyl	-0.359156	3.72143	0.496106	0.481216	0.999827	NS	Phosphatidylinositol N-acetylglucosaminyltransferase subunit Y
ENSMUSG00000010608	Rbm25	0.416876	6.90859	2.50032	0.113823	0.999827	NS	RNA-binding protein 25
ENSMUSG00000010609	Psen2	0.165721	4.78177	0.198878	0.655628	0.999827	NS	presenilin 2
ENSMUSG00000010663	Fads1	0.236287	5.90084	0.771674	0.3797	0.999827	NS	Fatty acid desaturase 1
ENSMUSG00000010721	Lmbr1	-0.298507	3.81231	0.246929	0.619246	0.999827	NS	Limb region 1 protein
ENSMUSG00000010751	Tnfrsf22	0.327129	2.49494	0.167112	0.682691	0.999827	NS	Tumor necrosis factor receptor superfamily member 22
ENSMUSG00000010755	Cars	-0.316496	4.77045	0.782768	0.376296	0.999827	NS	Cysteine--tRNA ligase, cytoplasmic
ENSMUSG00000010830	Kdelr3	-0.0175751	4.4648	0.00193867	0.96488	0.999827	NS	KDEL (Lys-Asp-Glu-Leu) endoplasmic reticulum protein retention receptor 3
ENSMUSG00000010911	Apip	0.247583	3.65348	0.224495	0.635636	0.999827	NS	Methylthioribulose-1-phosphate dehydratase
ENSMUSG00000010914	Pdhx	-0.176325	4.67475	0.219216	0.639638	0.999827	NS	Pyruvate dehydrogenase protein X component, mitochondrial
ENSMUSG00000010936	Vac14	-0.216727	5.90744	0.528262	0.467338	0.999827	NS	Vac14 homolog (S. cerevisiae)
ENSMUSG00000011034	Slc5a1	-1.37134	2.60114	2.50156	0.113733	0.999827	NS	solute carrier family 5 (sodium/glucose cotransporter), member 1
ENSMUSG00000011096	Akt1s1	0.11212	4.60901	0.09234	0.761223	0.999827	NS	Proline-rich AKT1 substrate 1
ENSMUSG00000011114	Tbrg1	-0.177013	7.18633	0.403113	0.525486	0.999827	NS	Transforming growth factor beta regulator 1
ENSMUSG00000011148	Adssl1	-0.914225	1.8773	0.85604	0.354849	0.999827	NS	adenylosuccinate synthetase like 1
ENSMUSG00000011158	Brf1	-0.561995	4.84949	1.69743	0.192625	0.999827	NS	BRF1, RNA polymerase III transcription initiation factor 90 kDa subunit
ENSMUSG00000011171	Vipr2	0.81586	0.926169	0.211581	0.645531	0.999827	NS	vasoactive intestinal peptide receptor 2
ENSMUSG00000011179	Odc1	0.39998	6.60814	1.59329	0.206856	0.999827	NS	ornithine decarboxylase, structural 1
ENSMUSG00000011254	Thg1l	-2.26611	0.184837	1.77387	0.182904	0.999827	NS	tRNA-histidine guanylyltransferase 1-like (S. cerevisiae)
ENSMUSG00000011257	Pabpc4	0.892355	2.78032	1.56753	0.210566	0.999827	NS	poly(A) binding protein, cytoplasmic 4
ENSMUSG00000011263	Exoc3l2	0.275059	-0.453772	0.0129298	0.909468	0.999827	NS
ENSMUSG00000011267	Zfp296	-1.10038	0.267089	0.388429	0.533127	0.999827	NS	zinc finger protein 296
ENSMUSG00000011306	Sugp1	0.112568	5.55851	0.170122	0.680003	0.999827	NS	SURP and G-patch domain-containing protein 1
ENSMUSG00000011382	Dhdh	-0.652014	2.48755	0.709714	0.399539	0.999827	NS	Trans-1,2-dihydrobenzene-1,2-diol dehydrogenase
ENSMUSG00000011427	Zfp790	0.0516868	5.26949	0.0291818	0.86436	0.999827	NS	zinc finger protein 790
ENSMUSG00000011658	Fuz	-0.198145	3.25009	0.103384	0.747806	0.999827	NS	fuzzy planar cell polarity protein
ENSMUSG00000011751	Sptbn4	-0.116717	5.86792	0.176554	0.674352	0.999827	NS	spectrin beta, non-erythrocytic 4
ENSMUSG00000011752	Pgam1	0.115736	8.01835	0.111897	0.737995	0.999827	NS	Phosphoglycerate mutase 1
ENSMUSG00000011831	Evi5	-0.23815	5.10278	0.391051	0.531747	0.999827	NS	ecotropic viral integration site 5
ENSMUSG00000011832	Evi5l	-0.551364	4.3753	1.76183	0.184397	0.999827	NS	Mus musculus ecotropic viral integration site 5 like (Evi5l), transcript variant 2, mRNA.
ENSMUSG00000011837	Snapc2	0.0125	4.45999	0.00102597	0.974447	0.999827	NS	snRNA-activating protein complex subunit 2
ENSMUSG00000011877	Git1	0.207263	6.08951	0.58285	0.445198	0.999827	NS	ARF GTPase-activating protein GIT1
ENSMUSG00000011884	Gltp	-0.0956989	5.38304	0.111366	0.738594	0.999827	NS	Glycolipid transfer protein
ENSMUSG00000011958	Bnip2	-0.28621	3.58843	0.228293	0.632793	0.999827	NS	BCL2/adenovirus E1B 19 kDa protein-interacting protein 2
ENSMUSG00000011960	Ccnt1	0.385242	6.1198	2.02019	0.15522	0.999827	NS	Cyclin-T1
ENSMUSG00000012017	Scarf2	0.0568936	3.39994	0.00676587	0.934444	0.999827	NS	Scavenger receptor class F member 2
ENSMUSG00000012076	Brms1l	-0.152899	4.21815	0.127265	0.721285	0.999827	NS	Breast cancer metastasis-suppressor 1-like protein
ENSMUSG00000012114	Med15	-0.0972641	6.36278	0.150707	0.697861	0.999827	NS	mediator of RNA polymerase II transcription subunit 15 isoform c
ENSMUSG00000012117	Dhdds	-0.133948	6.21572	0.23845	0.625328	0.999827	NS	Dehydrodolichyl diphosphate synthase complex subunit Dhdds
ENSMUSG00000012126	Ubxn11	-0.987349	1.81232	0.960469	0.327069	0.999827	NS	UBX domain protein 11
ENSMUSG00000012296	Tjap1	-0.243485	3.97241	0.273906	0.600724	0.999827	NS	tight junction associated protein 1
ENSMUSG00000012350	Ehf	0.104111	3.7326	0.0341669	0.853352	0.999827	NS	ETS homologous factor
ENSMUSG00000012405	Rpl15	0.224013	6.76534	0.785031	0.375607	0.999827	NS	ribosomal protein L15
ENSMUSG00000012422	Tmem167	-0.0645373	6.1324	0.0542519	0.815823	0.999827	NS	transmembrane protein 167
ENSMUSG00000012429	Mplkip	-0.259361	4.27485	0.371252	0.542323	0.999827	NS	M-phase specific PLK1 intereacting protein
ENSMUSG00000012483	Rpa3	0.12142	3.36002	0.0430811	0.835573	0.999827	NS	Replication protein A 14 kDa subunit
ENSMUSG00000012519	Mlkl	-2.27673	0.549296	1.56403	0.211076	0.999827	NS	Mixed lineage kinase domain-like protein
ENSMUSG00000012535	Tnpo3	0.0536397	6.77959	0.0390124	0.843424	0.999827	NS	Mus musculus transportin 3 (Tnpo3), transcript variant 2, mRNA.
ENSMUSG00000012609	Ttll5	-0.295611	4.60652	0.563836	0.452719	0.999827	NS	tubulin tyrosine ligase-like family, member 5
ENSMUSG00000012640	Zfp715	0.00290988	4.73654	6.5643e-05	0.993536	0.999827	NS	zinc finger protein 715
ENSMUSG00000012848	Rps5	0.318295	5.44908	1.23185	0.267047	0.999827	NS	ribosomal protein S5
ENSMUSG00000013033	Adgrl1	0.247118	4.53287	0.325294	0.568444	0.999827	NS	Adhesion G protein-coupled receptor L1
ENSMUSG00000013076	Amotl1	-1.25391	2.09252	1.9201	0.165846	0.999827	NS	Angiomotin-like protein 1
ENSMUSG00000013089	Etv5	-0.220873	4.22178	0.220914	0.638344	0.999827	NS	ETS translocation variant 5
ENSMUSG00000013150	Gfod2	-0.14039	4.4989	0.135024	0.713278	0.999827	NS	Glucose-fructose oxidoreductase domain-containing protein 2
ENSMUSG00000013155	Enkd1	-0.234638	1.34081	0.0436109	0.834579	0.999827	NS	Enkurin domain-containing protein 1
ENSMUSG00000013160	Atp6v0d1	-0.119648	6.28389	0.218734	0.640006	0.999827	NS	V-type proton ATPase subunit d 1
ENSMUSG00000013236	Ptprs	0.184424	6.20086	0.451463	0.501641	0.999827	NS	Receptor-type tyrosine-protein phosphatase S
ENSMUSG00000013275	Slc41a1	0.274463	4.69253	0.298706	0.584695	0.999827	NS	Solute carrier family 41 member 1
ENSMUSG00000013415	Igf2bp1	-1.65685	0.250183	1.09623	0.295096	0.999827	NS	Insulin-like growth factor 2 mRNA-binding protein 1
ENSMUSG00000013419	Zfp651	-0.518214	5.09298	1.90766	0.167223	0.999827	NS	zinc finger protein 651
ENSMUSG00000013465	Nelfb	-0.339533	6.36003	1.82654	0.176537	0.999827	NS	negative elongation factor B isoform 1
ENSMUSG00000013495	Tmem175	0.100249	4.78794	0.0755194	0.783464	0.999827	NS	transmembrane protein 175
ENSMUSG00000013539	Tango2	-1.25045	2.98371	3.12093	0.0772926	0.999827	NS	transport and golgi organization 2
ENSMUSG00000013593	Ndufs2	-0.0384324	7.16681	0.0188677	0.890746	0.999827	NS	NADH dehydrogenase [ubiquinone] iron-sulfur protein 2, mitochondrial
ENSMUSG00000013622	Atraid	0.00498667	6.88986	0.000367862	0.984698	0.999827	NS	All-trans retinoic acid-induced differentiation factor
ENSMUSG00000013629	Cad	0.257033	5.16169	0.488105	0.484774	0.999827	NS	CAD protein Glutamine-dependent carbamoyl-phosphate synthase Aspartate carbamoyltransferase Dihydroo
ENSMUSG00000013646	Sh3bp5l	-0.106621	5.61247	0.156293	0.692593	0.999827	NS	SH3 binding domain protein 5 like
ENSMUSG00000013662	Atad1	-0.171567	6.92085	0.431236	0.511383	0.999827	NS	ATPase family AAA domain-containing protein 1
ENSMUSG00000013663	Pten	0.0234851	6.80166	0.00791841	0.929093	0.999827	NS	phosphatase and tensin homolog
ENSMUSG00000013698	Pea15a	0.0834308	8.04034	0.0550922	0.814428	0.999827	NS	Mus musculus phosphoprotein enriched in astrocytes 15A (Pea15a), transcript variant 4, mRNA.
ENSMUSG00000013701	Timm23	0.0130345	6.33455	0.00266499	0.958829	0.999827	NS	translocase of inner mitochondrial membrane 23
ENSMUSG00000013736	Trnt1	0.0597304	5.5688	0.0456497	0.830814	0.999827	NS	CCA tRNA nucleotidyltransferase 1, mitochondrial
ENSMUSG00000013787	Ehmt2	-0.275735	5.70008	0.92802	0.335378	0.999827	NS	Histone-lysine N-methyltransferase EHMT2
ENSMUSG00000013822	Elof1	-0.0323777	6.00445	0.0151687	0.901979	0.999827	NS	Mus musculus ELF1 homolog, elongation factor 1 (Elof1), transcript variant 4, mRNA.
ENSMUSG00000013833	Med16	0.150047	6.49756	0.275405	0.599729	0.999827	NS	mediator complex subunit 16
ENSMUSG00000013846	St3gal1	1.20747	2.35404	1.65296	0.198557	0.999827	NS	ST3 beta-galactoside alpha-2,3-sialyltransferase 1
ENSMUSG00000013858	Tmem259	-0.140768	3.33444	0.0523414	0.819038	0.999827	NS	transmembrane protein 259
ENSMUSG00000013878	Rnf170	0.271047	5.21513	0.671001	0.412703	0.999827	NS	Mus musculus ring finger protein 170 (Rnf170), transcript variant 3, mRNA.
ENSMUSG00000013921	Clip3	-0.0336844	5.48071	0.0136691	0.906927	0.999827	NS	CAP-Gly domain-containing linker protein 3
ENSMUSG00000013973	Dedd	-0.406288	4.62966	1.1556	0.28238	0.999827	NS	Death effector domain-containing protein
ENSMUSG00000013997	Nit1	0.049548	4.96809	0.0207563	0.885445	0.999827	NS	Deaminated glutathione amidase
ENSMUSG00000014039	Prdm15	-0.158764	3.51931	0.0667021	0.7962	0.999827	NS	Mus musculus PR domain containing 15 (Prdm15), transcript variant 2, mRNA.
ENSMUSG00000014074	Rnf168	-0.494116	3.96938	0.84819	0.357065	0.999827	NS	E3 ubiquitin-protein ligase RNF168
ENSMUSG00000014075	Tctex1d2	-0.203753	3.41439	0.12819	0.720317	0.999827	NS	Tctex1 domain containing 2
ENSMUSG00000014077	Chp1	0.201775	6.29944	0.563875	0.452703	0.999827	NS	Calcineurin B homologous protein 1
ENSMUSG00000014164	Klhl3	0.878217	-0.073928	0.274948	0.600032	0.999827	NS	Kelch-like protein 3
ENSMUSG00000014177	Tvp23b	-0.0432329	7.2422	0.0205772	0.885937	0.999827	NS	trans-golgi network vesicle protein 23B
ENSMUSG00000014195	Dnajc7	0.292102	6.83655	1.23924	0.265618	0.999827	NS	DnaJ homolog subfamily C member 7
ENSMUSG00000014226	Cacybp	0.129292	6.84557	0.254197	0.614135	0.999827	NS	Calcyclin-binding protein
ENSMUSG00000014232	Cluap1	0.221725	4.66104	0.376379	0.539547	0.999827	NS	Clusterin-associated protein 1
ENSMUSG00000014243	Zswim7	0.124471	3.89139	0.0663275	0.796761	0.999827	NS	zinc finger SWIM-type containing 7
ENSMUSG00000014245	Pigl	0.0616873	2.48191	0.00625578	0.936958	0.999827	NS	N-acetylglucosaminyl-phosphatidylinositol de-N-acetylase
ENSMUSG00000014294	Ndufa2	-0.0999655	5.7058	0.125523	0.72312	0.999827	NS	NADH dehydrogenase [ubiquinone] 1 alpha subcomplex subunit 2
ENSMUSG00000014301	Pam16	0.117659	4.2381	0.074122	0.785427	0.999827	NS	Mitochondrial import inner membrane translocase subunit TIM16
ENSMUSG00000014303	Glis2	-0.194584	3.4396	0.10843	0.741938	0.999827	NS	Zinc finger protein GLIS2
ENSMUSG00000014313	Cox6c	-0.0687242	6.21898	0.0669917	0.795768	0.999827	NS	Cytochrome c oxidase subunit 6C
ENSMUSG00000014329	Bicc1	0.25053	5.62075	0.711998	0.398781	0.999827	NS	Protein bicaudal C homolog 1
ENSMUSG00000014349	Ube2z	0.0543535	6.01191	0.0455491	0.830998	0.999827	NS	ubiquitin-conjugating enzyme E2Z
ENSMUSG00000014353	Tmem87b	0.0145867	6.50452	0.00317267	0.955082	0.999827	NS	Mus musculus transmembrane protein 87B (Tmem87b), transcript variant 3, mRNA.
ENSMUSG00000014355	Anapc1	-0.239979	6.45029	0.676527	0.410785	0.999827	NS	Anaphase-promoting complex subunit 1
ENSMUSG00000014361	Mertk	0.505299	2.41296	0.351461	0.553287	0.999827	NS	Tyrosine-protein kinase Mer
ENSMUSG00000014402	Tsg101	0.0599098	6.839	0.0547188	0.815047	0.999827	NS	tumor susceptibility gene 101
ENSMUSG00000014418	Hps5	-0.120773	4.63385	0.10249	0.748862	0.999827	NS	Hermansky-Pudlak syndrome 5 protein homolog
ENSMUSG00000014426	Map3k4	-0.135375	5.732	0.21564	0.642382	0.999827	NS	Mitogen-activated protein kinase kinase kinase 4
ENSMUSG00000014444	Piezo1	-1.06094	1.28121	0.443249	0.505559	0.999827	NS	Mus musculus piezo-type mechanosensitive ion channel component 1 (Piezo1), transcript variant 1, mRN
ENSMUSG00000014470	Rnf166	0.150624	4.91719	0.188676	0.664021	0.999827	NS	ring finger protein 166
ENSMUSG00000014496	Ankrd28	-0.168404	4.98156	0.234183	0.628439	0.999827	NS	Serine/threonine-protein phosphatase 6 regulatory ankyrin repeat subunit A
ENSMUSG00000014498	Ankrd52	0.425468	2.1961	0.229488	0.631904	0.999827	NS	Serine/threonine-protein phosphatase 6 regulatory ankyrin repeat subunit C
ENSMUSG00000014503	Pkd2l2	-0.301255	1.49972	0.0756189	0.783325	0.999827	NS	Polycystic kidney disease 2-like 2 protein
ENSMUSG00000014504	Srp19	0.0932131	5.3892	0.0919218	0.761748	0.999827	NS	signal recognition particle 19
ENSMUSG00000014547	Wdfy2	-0.383063	1.93234	0.159416	0.689694	0.999827	NS	WD repeat and FYVE domain containing 2
ENSMUSG00000014550	Rbsn	-0.0584253	5.96853	0.0387812	0.843883	0.999827	NS	Rabenosyn-5
ENSMUSG00000014551	Mrps25	0.19429	3.5503	0.112988	0.736768	0.999827	NS	28S ribosomal protein S25, mitochondrial
ENSMUSG00000014554	Dguok	0.186514	4.99588	0.273695	0.600864	0.999827	NS	Deoxyguanosine kinase, mitochondrial
ENSMUSG00000014592	Camta1	-0.563433	4.25894	1.69296	0.193212	0.999827	NS	Calmodulin-binding transcription activator 1
ENSMUSG00000014599	Csf1	-0.351116	5.23964	0.90137	0.342415	0.999827	NS	Macrophage colony-stimulating factor 1 Processed macrophage colony-stimulating factor 1
ENSMUSG00000014601	Strip1	-0.201734	5.76434	0.52944	0.466842	0.999827	NS	Striatin-interacting protein 1
ENSMUSG00000014602	Kif1a	-0.217809	7.1199	0.637056	0.424779	0.999827	NS	kinesin family member 1A
ENSMUSG00000014606	Slc25a11	0.00258134	6.385	9.52066e-05	0.992215	0.999827	NS	solute carrier family 25 (mitochondrial carrier oxoglutarate carrier), member 11
ENSMUSG00000014633	Cmc2	-0.0679725	2.49063	0.00767367	0.930195	0.999827	NS	COX assembly mitochondrial
ENSMUSG00000014668	Chfr	-0.606775	4.38684	1.97372	0.160053	0.999827	NS	E3 ubiquitin-protein ligase CHFR
ENSMUSG00000014748	Tex261	0.0622065	6.33576	0.060194	0.80619	0.999827	NS	Protein TEX261
ENSMUSG00000014763	Fam120b	0.0568496	6.35057	0.0486817	0.825373	0.999827	NS	Mus musculus family with sequence similarity 120, member B (Fam120b), transcript variant 3, mRNA.
ENSMUSG00000014767	Tbp	-0.0736533	4.47124	0.0360153	0.849484	0.999827	NS	TATA box binding protein
ENSMUSG00000014769	Psmb1	0.0409192	7.07706	0.0219632	0.882185	0.999827	NS	proteasome (prosome, macropain) subunit, beta type 1
ENSMUSG00000014771	Pdcd2	0.286277	4.1676	0.422912	0.515487	0.999827	NS	programmed cell death 2
ENSMUSG00000014773	Dll1	0.675178	4.0746	2.07902	0.149336	0.999827	NS	Delta-like protein 1 Dll1-soluble form Dll1-derived cell-associated form Dll1-intracellular form
ENSMUSG00000014786	Slc9a5	0.484061	0.0755324	0.0598944	0.806663	0.999827	NS	solute carrier family 9 (sodium/hydrogen exchanger), member 5
ENSMUSG00000014791	Elmo3	-0.240524	4.68655	0.414171	0.51986	0.999827	NS	Engulfment and cell motility protein 3
ENSMUSG00000014813	Stc1	2.51851	0.800914	2.84156	0.0918552	0.999827	NS	stanniocalcin 1
ENSMUSG00000014837	4931428F04Rik	0.160721	4.91495	0.21505	0.642838	0.999827	NS	Uncharacterized protein KIAA0895-like
ENSMUSG00000014850	Msh3	-0.0576722	4.52487	0.0203548	0.88655	0.999827	NS	mutS homolog 3
ENSMUSG00000014856	Tmem208	-0.328589	4.47716	0.709092	0.399745	0.999827	NS	transmembrane protein 208
ENSMUSG00000014859	E2f4	0.0990448	5.34767	0.11299	0.736766	0.999827	NS	Transcription factor E2F4
ENSMUSG00000014867	Surf4	-0.379854	9.40375	0.440754	0.506759	0.999827	NS	Surfeit locus protein 4
ENSMUSG00000014873	Surf2	0.339113	4.2434	0.636584	0.424951	0.999827	NS	surfeit gene 2
ENSMUSG00000014905	Dnajb9	-0.0230873	6.86539	0.00655763	0.935459	0.999827	NS	DnaJ homolog subfamily B member 9
ENSMUSG00000014932	Yes1	-0.670433	4.62116	3.34831	0.0672741	0.999827	NS	YES proto-oncogene 1, Src family tyrosine kinase
ENSMUSG00000014956	Ppp1cb	-0.298313	7.76586	0.828855	0.362604	0.999827	NS	Serine/threonine-protein phosphatase PP1-beta catalytic subunit
ENSMUSG00000014959	Gorasp2	-0.100445	8.47033	0.054009	0.816229	0.999827	NS	golgi reassembly stacking protein 2
ENSMUSG00000014980	Tsen15	-0.542062	3.62531	0.955031	0.328442	0.999827	NS	tRNA splicing endonuclease subunit 15
ENSMUSG00000015002	Efr3a	0.166072	7.18538	0.338807	0.560519	0.999827	NS	Mus musculus EFR3 homolog A (Efr3a), transcript variant 2, mRNA.
ENSMUSG00000015013	Trappc2l	-0.101811	5.12461	0.0967346	0.755784	0.999827	NS	Trafficking protein particle complex subunit 2-like protein
ENSMUSG00000015016	Acsf3	0.186156	4.29823	0.195713	0.658204	0.999827	NS	Acyl-CoA synthetase family member 3, mitochondrial
ENSMUSG00000015023	Ddx19a	0.0885522	5.33248	0.0857713	0.769624	0.999827	NS	ATP-dependent RNA helicase DDX19A
ENSMUSG00000015027	Galns	0.0629892	5.64784	0.0398847	0.841706	0.999827	NS	N-acetylgalactosamine-6-sulfatase
ENSMUSG00000015083	C8g	-0.553696	1.95164	0.328492	0.566549	0.999827	NS	Complement component C8 gamma chain
ENSMUSG00000015085	Entpd2	-0.905109	2.01741	0.814687	0.366738	0.999827	NS	Ectonucleoside triphosphate diphosphohydrolase 2
ENSMUSG00000015087	Rabl6	-0.229007	6.20779	0.769964	0.380228	0.999827	NS	Rab-like protein 6
ENSMUSG00000015092	Edf1	0.0984155	6.0256	0.145222	0.703144	0.999827	NS	Endothelial differentiation-related factor 1
ENSMUSG00000015094	Npdc1	0.0926647	6.6291	0.133792	0.714532	0.999827	NS	Neural proliferation differentiation and control protein 1
ENSMUSG00000015095	Fbxw5	-0.144825	6.10877	0.305103	0.580701	0.999827	NS	Mus musculus F-box and WD-40 domain protein 5 (Fbxw5), transcript variant 3, mRNA.
ENSMUSG00000015112	Slc25a13	0.684097	3.27358	0.937168	0.333007	0.999827	NS	solute carrier family 25 (mitochondrial carrier, adenine nucleotide translocator), member 13
ENSMUSG00000015120	Ube2i	0.159195	7.06056	0.340367	0.559618	0.999827	NS	ubiquitin-conjugating enzyme E2I
ENSMUSG00000015126	Tsr3	-0.00974595	4.31803	0.000542796	0.981413	0.999827	NS	Ribosome biosis
ENSMUSG00000015127	Unkl	0.225213	2.76627	0.0925955	0.760903	0.999827	NS	unkempt family like zinc finger
ENSMUSG00000015133	Lrrk1	-0.172991	1.64321	0.0255595	0.872981	0.999827	NS	Leucine-rich repeat serine/threonine-protein kinase 1
ENSMUSG00000015134	Aldh1a3	-2.30694	0.62594	1.64242	0.199994	0.999827	NS	Aldehyde dehydrogenase family 1 member A3
ENSMUSG00000015143	Actn1	0.191394	3.32798	0.10421	0.746835	0.999827	NS	Mus musculus actinin, alpha 1 (Actn1), transcript variant 2, mRNA.
ENSMUSG00000015149	Sirt2	-0.0809857	5.68579	0.0719772	0.788479	0.999827	NS	NAD-dependent protein deacetylase sirtuin-2
ENSMUSG00000015165	Hnrnpl	0.0243512	6.47833	0.008225	0.927737	0.999827	NS	Heteroous nuclear ribonucleoprotein L
ENSMUSG00000015176	Nolc1	0.187393	6.05449	0.515804	0.472637	0.999827	NS	Nucleolar and coiled-body phosphoprotein 1
ENSMUSG00000015189	Casd1	0.31052	5.96355	1.38494	0.239262	0.999827	NS	N-acetylneuraminate 9-O-acetyltransferase
ENSMUSG00000015202	Magi1	-0.118693	4.29781	0.0593854	0.80747	0.999827	NS	Cnksr family member 3
ENSMUSG00000015214	Mtmr1	-0.314656	4.60697	0.562402	0.453294	0.999827	NS	Myotubularin-related protein 1
ENSMUSG00000015217	Hmgb3	0.408942	4.64516	1.27399	0.25902	0.999827	NS	High mobility group protein B3
ENSMUSG00000015222	Map2	0.00801635	6.78686	0.000961774	0.97526	0.999827	NS	Microtubule-associated protein 2
ENSMUSG00000015243	Abca1	0.424822	7.55748	1.5527	0.212737	0.999827	NS	ATP-binding cassette, sub-family A (ABC1), member 1
ENSMUSG00000015247	Nipsnap3b	-0.230735	5.49193	0.660211	0.416485	0.999827	NS	3B
ENSMUSG00000015289	Lage3	-0.187226	4.0483	0.173302	0.677194	0.999827	NS	EKC/KEOPS complex subunit Lage3
ENSMUSG00000015290	Ubl4a	-0.336172	6.02872	1.3089	0.252594	0.999827	NS	Ubiquitin-like protein 4A
ENSMUSG00000015291	Gdi1	-0.169703	8.3257	0.183689	0.668222	0.999827	NS	Rab GDP dissociation inhibitor alpha
ENSMUSG00000015335	Zdhhc12	-0.321332	3.25249	0.263619	0.607645	0.999827	NS	zinc finger, DHHC domain containing 12
ENSMUSG00000015337	Endog	0.228861	3.85556	0.226149	0.634394	0.999827	NS	Endonuclease G, mitochondrial
ENSMUSG00000015341	Golga7	-0.0390138	6.75002	0.0223801	0.88108	0.999827	NS	golgi autoantigen, golgin subfamily a, 7
ENSMUSG00000015342	Xk	-0.530503	4.89739	2.28709	0.130454	0.999827	NS	X-linked Kx blood group
ENSMUSG00000015354	Pcolce2	1.15012	2.16996	1.51785	0.217945	0.999827	NS	Procollagen C-endopeptidase enhancer 2
ENSMUSG00000015357	Clpx	0.0871768	6.7211	0.11636	0.733017	0.999827	NS	ATP-dependent Clp protease ATP-binding subunit clpX-like, mitochondrial
ENSMUSG00000015363	Trabd	-0.300336	7.01687	1.13158	0.287439	0.999827	NS	Mus musculus TraB domain containing (Trabd), transcript variant 2, mRNA.
ENSMUSG00000015377	Dennd6b	-1.35734	2.84726	2.90044	0.0885556	0.999827	NS	Protein DENND6B
ENSMUSG00000015396	Cd83	0.828486	3.71389	2.14537	0.143	0.999827	NS	CD83 antigen
ENSMUSG00000015401	Tmem27	0.252875	9.36181	0.185755	0.666474	0.999827	NS	Collectrin
ENSMUSG00000015405	Ace2	-0.180193	4.00234	0.114868	0.734669	0.999827	NS	angiotensin I converting enzyme (peptidyl-dipeptidase A) 2
ENSMUSG00000015461	Atf6b	-0.139646	6.03939	0.283495	0.59442	0.999827	NS	activating transcription factor 6 beta
ENSMUSG00000015468	Notch4	0.918167	0.514828	0.411362	0.521279	0.999827	NS	notch 4
ENSMUSG00000015474	Ppt2	1.46603	1.55003	1.7369	0.187532	0.999827	NS	Lysosomal thioesterase PPT2
ENSMUSG00000015476	Prrt1	0.368064	1.7506	0.126285	0.722315	0.999827	NS	proline-rich transmembrane protein 1
ENSMUSG00000015478	Rnf5	-0.192159	6.09151	0.504628	0.477474	0.999827	NS	E3 ubiquitin-protein ligase RNF5
ENSMUSG00000015484	Fam163a	-0.0512351	5.19543	0.0244454	0.875757	0.999827	NS	Protein FAM163A
ENSMUSG00000015488	Cacfd1	-0.0199692	6.5134	0.00629728	0.93675	0.999827	NS	Calcium channel flower homolog
ENSMUSG00000015501	Hivep2	-0.472553	4.75673	1.15198	0.283135	0.999827	NS	Mus musculus human immunodeficiency virus type I enhancer binding protein 2 (Hivep2), transcript var
ENSMUSG00000015522	Arnt	-0.167382	5.68876	0.306009	0.580139	0.999827	NS	Aryl hydrocarbon receptor nuclear translocator
ENSMUSG00000015533	Itga2	0.227573	2.85691	0.105718	0.745073	0.999827	NS	Integrin alpha-2
ENSMUSG00000015536	Mocs2	-0.264325	6.20465	0.849234	0.356769	0.999827	NS	molybdenum cofactor synthesis 2
ENSMUSG00000015542	Nat9	-0.00441878	3.64791	6.94237e-05	0.993352	0.999827	NS	N-acetyltransferase 9
ENSMUSG00000015568	Lpl	0.410966	8.69115	0.784532	0.375759	0.999827	NS	lipoprotein lipase
ENSMUSG00000015575	Atp6v0e	0.147119	6.56481	0.345067	0.556919	0.999827	NS	V-type proton ATPase subunit e 1
ENSMUSG00000015597	Zfp318	0.081547	3.97806	0.0239066	0.877123	0.999827	NS	zinc finger protein 318
ENSMUSG00000015605	Srf	0.7322	4.67906	3.3439	0.0674547	0.999827	NS	Serum response factor
ENSMUSG00000015647	Lama5	-1.1457	1.50555	1.01137	0.314575	0.999827	NS	Laminin subunit alpha-5
ENSMUSG00000015652	Steap1	0.0505166	0.0221383	0.000660336	0.979499	0.999827	NS	Metalloreductase STEAP1
ENSMUSG00000015653	Steap2	0.369767	4.94929	0.938009	0.33279	0.999827	NS	six transmembrane epithelial antigen of prostate 2
ENSMUSG00000015656	Hspa8	0.424482	10.0434	0.372317	0.541744	0.999827	NS	Heat shock cognate 71 kDa protein
ENSMUSG00000015659	Serac1	-0.302393	1.45491	0.0709436	0.789968	0.999827	NS	Protein SERAC1
ENSMUSG00000015668	Pdzd11	-0.322487	4.85767	0.844412	0.358138	0.999827	NS	PDZ domain-containing protein 11
ENSMUSG00000015671	Psma2	-0.016236	6.95214	0.00378874	0.950919	0.999827	NS	Proteasome subunit alpha type-2
ENSMUSG00000015672	Mrpl32	-0.108975	4.57322	0.0715244	0.78913	0.999827	NS	39S ribosomal protein L32, mitochondrial
ENSMUSG00000015697	Setdb1	-0.635793	5.15284	3.89668	0.0483815	0.999827	NS	SET domain, bifurcated 1
ENSMUSG00000015709	Arnt2	0.510516	3.53267	0.80578	0.369371	0.999827	NS	Aryl hydrocarbon receptor nuclear translocator 2
ENSMUSG00000015711	Prune1	-0.670406	4.11744	2.19952	0.138054	0.999827	NS	Exopolyphosphatase PRUNE1
ENSMUSG00000015714	Cers2	0.0548502	6.49102	0.0444013	0.833109	0.999827	NS	Ceramide synthase 2
ENSMUSG00000015733	Capza2	-0.0336556	7.55427	0.0125914	0.910656	0.999827	NS	F-actin-capping protein subunit alpha-2
ENSMUSG00000015745	Plekho1	-0.200772	0.586389	0.0205249	0.886081	0.999827	NS	Pleckstrin homology domain-containing family O member 1
ENSMUSG00000015747	Vps45	-0.149875	4.69846	0.163466	0.685985	0.999827	NS	vacuolar protein sorting 45
ENSMUSG00000015748	Prpf3	0.0822305	4.65792	0.0455418	0.831011	0.999827	NS	U4/U6 small nuclear ribonucleoprotein Prp3
ENSMUSG00000015749	Anp32e	-0.0785164	7.42437	0.0537849	0.816603	0.999827	NS	Acidic leucine-rich nuclear phosphoprotein 32 family member E
ENSMUSG00000015750	Aph1a	0.171536	5.83123	0.39441	0.52999	0.999827	NS	Gamma-secretase subunit APH-1A
ENSMUSG00000015755	Tab2	0.204113	4.16702	0.162617	0.686759	0.999827	NS	TGF-beta-activated kinase 1 and MAP3K7-binding protein 2
ENSMUSG00000015757	Ppil4	-0.0696418	6.17271	0.0686447	0.79332	0.999827	NS	Peptidyl-prolyl cis-trans isomerase-like 4
ENSMUSG00000015759	Cnih1	0.130735	5.68215	0.210839	0.646111	0.999827	NS	1
ENSMUSG00000015766	Eps8	0.175541	7.09737	0.279439	0.597069	0.999827	NS	Epidermal growth factor receptor kinase substrate 8
ENSMUSG00000015776	Med22	-0.123524	6.44982	0.240236	0.624036	0.999827	NS	Mediator of RNA polymerase II transcription subunit 22
ENSMUSG00000015790	Surf1	-0.421705	4.72419	1.38689	0.23893	0.999827	NS	Surfeit locus protein 1
ENSMUSG00000015804	Med28	0.175731	6.35119	0.451594	0.501579	0.999827	NS	Mediator of RNA polymerase II transcription subunit 28
ENSMUSG00000015806	Qdpr	-0.0504895	7.57813	0.0275712	0.868121	0.999827	NS	quinoid dihydropteridine reductase
ENSMUSG00000015829	Tnr	-0.0283843	6.31592	0.00864292	0.92593	0.999827	NS	Tenascin-R
ENSMUSG00000015837	Sqstm1	0.063326	9.17162	0.0127834	0.90998	0.999827	NS	Sequestosome-1
ENSMUSG00000015839	Nfe2l2	0.125778	5.90424	0.212984	0.644439	0.999827	NS	Nuclear factor erythroid 2-related factor 2
ENSMUSG00000015846	Rxra	0.268499	4.05724	0.354913	0.551345	0.999827	NS	retinoid X receptor alpha
ENSMUSG00000015850	Adamtsl4	0.0864767	0.97453	0.00262472	0.959141	0.999827	NS	ADAMTS-like protein 4
ENSMUSG00000015869	Prpsap1	0.423805	5.67231	2.51071	0.113075	0.999827	NS	phosphoribosyl pyrophosphate synthetase-associated protein 1
ENSMUSG00000015880	Ncapg	0.907891	2.3869	0.921813	0.336999	0.999827	NS	non-SMC condensin I complex subunit G
ENSMUSG00000015882	Lcorl	-0.208124	5.45805	0.475981	0.490249	0.999827	NS	Ligand-dependent nuclear receptor corepressor-like protein
ENSMUSG00000015889	Lta4h	0.236978	5.30969	0.602024	0.437807	0.999827	NS	Leukotriene A-4 hydrolase
ENSMUSG00000015932	Dstn	0.158461	8.54765	0.132117	0.716247	0.999827	NS	Destrin
ENSMUSG00000015937	H2afy	-0.0278256	8.02748	0.00647554	0.935863	0.999827	NS	Core histone macro-H2A.1
ENSMUSG00000015942	Gtf2ird2	-0.229721	3.82069	0.214242	0.643463	0.999827	NS	ral transcription factor II-I repeat domain-containing protein 2
ENSMUSG00000015943	Bola1	-0.0490873	3.26486	0.00674038	0.934567	0.999827	NS	BolA-like protein 1
ENSMUSG00000015944	Gatsl2	-0.00264566	7.67782	6.95412e-05	0.993346	0.999827	NS	GATS protein-like 2
ENSMUSG00000015961	Adss	-0.195449	4.78171	0.300349	0.583664	0.999827	NS	adenylosuccinate synthetase, non muscle
ENSMUSG00000015968	Cacna1d	-0.352627	5.5192	1.03089	0.30995	0.999827	NS	Voltage-dependent L-type calcium channel subunit alpha-1D
ENSMUSG00000015970	Chdh	0.187451	-0.155174	0.00725879	0.932104	0.999827	NS	Choline dehydrogenase, mitochondrial
ENSMUSG00000015971	Actr8	0.225355	6.0874	0.720245	0.396064	0.999827	NS	Actin-related protein 8
ENSMUSG00000015980	Lrrc27	0.544428	3.04899	0.678378	0.410146	0.999827	NS	Leucine-rich repeat-containing protein 27
ENSMUSG00000015994	Fnta	0.0732823	6.4767	0.0855016	0.769976	0.999827	NS	Protein farnesyltransferase/geranylgeranyltransferase type-1 subunit alpha
ENSMUSG00000016018	Skiv2l2	-0.184616	5.96368	0.502847	0.478252	0.999827	NS	Superkiller viralicidic activity 2-like 2
ENSMUSG00000016024	Lbp	0.620039	1.79462	0.355873	0.550807	0.999827	NS	Lipopolysaccharide-binding protein
ENSMUSG00000016028	Celsr1	-0.205953	1.24537	0.0295019	0.863625	0.999827	NS	Cadherin EGF LAG seven-pass G-type receptor 1
ENSMUSG00000016128	Stard13	-0.220452	5.09284	0.440133	0.507058	0.999827	NS	StAR-related lipid transfer protein 13
ENSMUSG00000016179	Camk1g	-0.0455804	5.69505	0.0222646	0.881385	0.999827	NS	Calcium/calmodulin-dependent protein kinase type 1G
ENSMUSG00000016181	Diexf	0.0186332	2.4051	0.000457776	0.98293	0.999827	NS	digestive organ expansion factor homolog (zebrafish)
ENSMUSG00000016200	Syt14	-0.39343	5.58615	2.02226	0.155008	0.999827	NS	Synaptotagmin-14
ENSMUSG00000016206	H2-M3	-0.170625	4.07035	0.147037	0.701383	0.999827	NS
ENSMUSG00000016239	Lonrf3	-0.726185	-0.0331867	0.136373	0.711914	0.999827	NS	LON peptidase N-terminal domain and RING finger protein 3
ENSMUSG00000016252	Atp5e	-0.000305829	5.26673	9.22997e-07	0.999233	0.999827	NS	ATP synthase subunit epsilon, mitochondrial
ENSMUSG00000016253	Nelfcd	-0.440246	5.60053	2.75428	0.0969943	0.999827	NS	Negative elongation factor D
ENSMUSG00000016255	Tubb1	-1.17751	1.4906	0.564792	0.452336	0.999827	NS	tubulin, beta 1 class VI
ENSMUSG00000016256	Ctsz	-0.241968	5.52908	0.716806	0.397194	0.999827	NS	cathepsin Z
ENSMUSG00000016257	Prelid3b	-0.0430403	5.86165	0.0247403	0.875016	0.999827	NS	PRELI domain containing 3B
ENSMUSG00000016262	Sertad4	-0.201404	5.61212	0.481893	0.487566	0.999827	NS	SERTA domain-containing protein 4
ENSMUSG00000016308	Ube2a	-0.107893	4.65472	0.081197	0.775682	0.999827	NS	ubiquitin-conjugating enzyme E2A
ENSMUSG00000016319	Slc25a5	0.147052	7.98737	0.180446	0.67099	0.999827	NS	solute carrier family 25 (mitochondrial carrier, adenine nucleotide translocator), member 5
ENSMUSG00000016344	Ppdpf	0.276126	4.62383	0.563203	0.452972	0.999827	NS	Pancreatic progenitor cell differentiation and proliferation factor
ENSMUSG00000016346	Kcnq2	-1.10953	1.0088	0.434275	0.509899	0.999827	NS	potassium voltage-gated channel subfamily KQT member 2 isoform 13
ENSMUSG00000016356	Col20a1	-3.59282	0.764024	4.13101	0.0421041	0.999827	NS	Collagen alpha-1(XX) chain
ENSMUSG00000016382	Pls3	-0.503255	4.27478	0.930524	0.334727	0.999827	NS	Mus musculus plastin 3 (T-isoform) (Pls3), transcript variant 4, mRNA.
ENSMUSG00000016386	Mpped2	-0.365489	2.45762	0.197135	0.657043	0.999827	NS	Metallophosphoesterase MPPED2
ENSMUSG00000016409	Nkap	-0.0874752	4.18043	0.0402509	0.840991	0.999827	NS	NF-kappa-B-activating protein
ENSMUSG00000016427	Ndufa1	0.0118862	6.48357	0.00167653	0.967339	0.999827	NS	NADH dehydrogenase [ubiquinone] 1 alpha subcomplex subunit 1
ENSMUSG00000016477	E2f3	-0.0904585	1.71723	0.0077047	0.930054	0.999827	NS	Transcription factor E2F3
ENSMUSG00000016481	Cr1l	-0.0042018	6.06857	0.000244857	0.987515	0.999827	NS	Mus musculus complement component (3b/4b) receptor 1-like (Cr1l), transcript variant 2, mRNA.
ENSMUSG00000016487	Ppfibp1	0.247668	6.30667	0.935757	0.333371	0.999827	NS	PTPRF interacting protein, binding protein 1 (liprin beta 1)
ENSMUSG00000016494	Cd34	-0.732291	2.40445	0.300218	0.583746	0.999827	NS	Hematopoietic progenitor cell antigen CD34
ENSMUSG00000016495	Plgrkt	-0.155679	3.80648	0.0944233	0.758627	0.999827	NS	Plasminogen receptor (KT)
ENSMUSG00000016496	Cd274	-0.40126	3.19318	0.39397	0.53022	0.999827	NS	CD274 antigen
ENSMUSG00000016503	Gtf3a	-0.0251458	5.61529	0.00918721	0.92364	0.999827	NS	transcription factor IIIA
ENSMUSG00000016510	Mtif3	0.00843514	4.81616	0.0005541	0.98122	0.999827	NS	mitochondrial translational initiation factor 3
ENSMUSG00000016520	Lnx2	-0.462793	5.04768	1.43033	0.23171	0.999827	NS	Ligand of Numb protein X 2
ENSMUSG00000016526	Dyrk3	0.713458	5.25475	4.68813	0.0303717	0.999827	NS	Dual specificity tyrosine-phosphorylation-regulated kinase 3
ENSMUSG00000016528	Mapkapk2	0.22825	6.30949	0.807976	0.368719	0.999827	NS	MAP kinase-activated protein kinase 2
ENSMUSG00000016534	Lamp2	0.175416	7.85168	0.270641	0.602902	0.999827	NS	Lysosome-associated membrane glycoprotein 2
ENSMUSG00000016541	Atxn10	-0.128291	8.01242	0.140037	0.708244	0.999827	NS	Ataxin-10
ENSMUSG00000016552	Foxred2	-0.0584519	6.12044	0.0474012	0.827649	0.999827	NS	FAD-dependent oxidoreductase domain-containing protein 2
ENSMUSG00000016554	Eif3d	0.0627516	7.13849	0.0522705	0.819159	0.999827	NS	Eukaryotic translation initiation factor 3 subunit D
ENSMUSG00000016559	H3f3b	0.250092	9.70183	0.158068	0.690942	0.999827	NS	Histone H3.3
ENSMUSG00000016619	Nup50	-0.12047	5.93947	0.205409	0.650389	0.999827	NS	Nuclear pore complex protein Nup50
ENSMUSG00000016624	Phf21b	0.0222705	2.99521	0.00101629	0.974568	0.999827	NS	PHD finger protein 21B
ENSMUSG00000016637	Ift27	0.0451494	4.5176	0.014167	0.905255	0.999827	NS	Intraflagellar transport
ENSMUSG00000016664	Pacsin2	-0.595607	5.17878	2.29319	0.129943	0.999827	NS	protein kinase C and casein kinase substrate in neurons 2
ENSMUSG00000016757	Ttll12	0.723388	3.80987	2.11377	0.145979	0.999827	NS	tubulin tyrosine ligase-like family, member 12
ENSMUSG00000016758	Bik	0.711269	3.07257	0.99579	0.318331	0.999827	NS	Bcl-2-interacting killer
ENSMUSG00000016831	Tox4	0.0128545	6.95124	0.0021426	0.96308	0.999827	NS	TOX high mobility group box family member 4
ENSMUSG00000016833	Mrps18c	0.0825229	4.50663	0.0428257	0.836054	0.999827	NS	28S ribosomal protein S18c, mitochondrial
ENSMUSG00000016921	Srsf6	0.0566744	7.99556	0.0263165	0.87113	0.999827	NS	serine/arginine-rich splicing factor 6
ENSMUSG00000016933	Plcg1	-0.102615	5.25858	0.0965481	0.756012	0.999827	NS	1-phosphatidylinositol 4,5-bisphosphate phosphodiesterase gamma-1
ENSMUSG00000016940	Kctd2	0.00544736	5.15951	0.000266874	0.986966	0.999827	NS	potassium channel tetramerization domain containing 2
ENSMUSG00000016942	Tmprss6	0.511219	2.44598	0.416879	0.518498	0.999827	NS	Mus musculus transmembrane serine protease 6 (Tmprss6), transcript variant 2, mRNA.
ENSMUSG00000016946	Kctd5	-0.0623506	5.42538	0.0356824	0.850173	0.999827	NS	potassium channel tetramerization domain containing 5
ENSMUSG00000016984	Etaa1	-0.644556	3.87863	1.77128	0.183224	0.999827	NS	Ewing's tumor-associated antigen 1 homolog
ENSMUSG00000017057	Il13ra1	-0.202237	5.49108	0.446317	0.504089	0.999827	NS	Interleukin-13 receptor subunit alpha-1
ENSMUSG00000017119	Nbr1	-0.186162	8.32127	0.221847	0.637636	0.999827	NS	neighbor of Brca1 gene 1
ENSMUSG00000017132	Cyth1	0.240796	6.30358	0.827051	0.363127	0.999827	NS	Cytohesin-1
ENSMUSG00000017144	Rnd3	0.666723	4.51501	2.46659	0.11629	0.999827	NS	Rho-related GTP-binding protein RhoE
ENSMUSG00000017146	Brca1	-0.345865	1.82478	0.0581431	0.809455	0.999827	NS	Breast cancer type 1 susceptibility protein homolog
ENSMUSG00000017176	Nt5c3b	0.283848	4.02045	0.38668	0.534049	0.999827	NS	5'-nucleotidase, cytosolic IIIB
ENSMUSG00000017188	Coa3	-0.303029	6.15346	1.33401	0.248093	0.999827	NS	Cytochrome c oxidase assembly factor 3 homolog, mitochondrial
ENSMUSG00000017195	Zpbp2	-0.543817	-0.390954	0.0632171	0.801482	0.999827	NS	zona pellucida binding protein 2
ENSMUSG00000017204	Gsdma	-0.499001	1.51511	0.20173	0.653328	0.999827	NS	Gasdermin-A
ENSMUSG00000017210	Med24	0.164135	6.18339	0.312221	0.576321	0.999827	NS	Mediator of RNA polymerase II transcription subunit 24
ENSMUSG00000017221	Psmd3	-0.0991494	7.20476	0.124623	0.724074	0.999827	NS	26S proteasome non-ATPase regulatory subunit 3
ENSMUSG00000017264	Exosc10	-0.260529	5.88309	0.907693	0.340727	0.999827	NS	Mus musculus exosome component 10 (Exosc10), transcript variant 5, mRNA.
ENSMUSG00000017286	Glod4	-0.142223	6.14952	0.288892	0.590932	0.999827	NS	Glyoxalase domain-containing protein 4
ENSMUSG00000017288	Vps53	-0.0112105	5.8531	0.00176589	0.966481	0.999827	NS	VPS53 GARP complex subunit
ENSMUSG00000017291	Taok1	-0.118771	4.67027	0.107753	0.742717	0.999827	NS	TAO kinase 1
ENSMUSG00000017299	Dnttip1	0.0792423	5.39307	0.0682666	0.793877	0.999827	NS	Deoxynucleotidyltransferase terminal-interacting protein 1
ENSMUSG00000017307	Acot8	-0.340731	2.88554	0.256162	0.612769	0.999827	NS	Acyl-coenzyme A thioesterase 8
ENSMUSG00000017311	Pyy	0.431367	11.944	0.170134	0.679993	0.999827	NS	peptide YY
ENSMUSG00000017314	Mpp2	-0.264586	5.50793	0.941394	0.331919	0.999827	NS	Mus musculus membrane protein, palmitoylated 2 (MAGUK p55 subfamily member 2) (Mpp2), transcript var
ENSMUSG00000017316	Ppy	-0.353052	10.7907	0.154918	0.693879	0.999827	NS	pancreatic polypeptide
ENSMUSG00000017344	Vtn	1.8127	3.70113	3.46283	0.0627629	0.999827	NS	vitronectin
ENSMUSG00000017376	Nlk	0.352603	3.6782	0.44482	0.504805	0.999827	NS	Serine/threonine-protein kinase NLK
ENSMUSG00000017386	Traf4	0.216395	4.82429	0.368377	0.54389	0.999827	NS	TNF receptor-associated factor 4
ENSMUSG00000017390	Aldoc	0.228936	5.25218	0.529661	0.46675	0.999827	NS	Fructose-bisphosphate aldolase C
ENSMUSG00000017404	Rpl19	0.24756	7.11038	0.771402	0.379784	0.999827	NS	ribosomal protein L19
ENSMUSG00000017405	Nek8	1.20051	2.25135	1.87354	0.17107	0.999827	NS	Serine/threonine-protein kinase Nek8
ENSMUSG00000017412	Cacnb4	-0.281324	0.342794	0.036582	0.848319	0.999827	NS	Mus musculus calcium channel, voltage-dependent, beta 4 subunit (Cacnb4), transcript variant 6, mRNA
ENSMUSG00000017421	Zfp207	-0.248165	6.96554	0.872836	0.350171	0.999827	NS	zinc finger protein 207
ENSMUSG00000017428	Psmd11	-0.250087	6.12059	0.83625	0.360471	0.999827	NS	26S proteasome non-ATPase regulatory subunit 11
ENSMUSG00000017446	C1qtnf1	-0.197604	1.93256	0.0418714	0.837865	0.999827	NS	Complement C1q tumor necrosis factor-related protein 1
ENSMUSG00000017453	Pipox	1.87419	1.07894	2.14093	0.143415	0.999827	NS	pipecolic acid oxidase
ENSMUSG00000017466	Timp2	-0.455633	5.52103	2.62184	0.105402	0.999827	NS	tissue inhibitor of metalloproteinase 2
ENSMUSG00000017478	Zc3h18	-0.0425438	5.21457	0.0179632	0.893381	0.999827	NS	zinc finger CCCH-type containing 18
ENSMUSG00000017485	Top2b	0.0857824	7.12286	0.0968443	0.75565	0.999827	NS	DNA topoisomerase 2-beta
ENSMUSG00000017493	Igfbp4	-0.921059	4.34609	0.434378	0.509849	0.999827	NS	Insulin-like growth factor-binding protein 4
ENSMUSG00000017499	Cdc6	1.19574	2.9053	2.58256	0.108047	0.999827	NS	Cell division control
ENSMUSG00000017548	Suz12	0.185058	5.49402	0.460048	0.497602	0.999827	NS	Polycomb protein Suz12
ENSMUSG00000017550	Atad5	-0.369051	3.08981	0.242567	0.622358	0.999827	NS	ATPase family AAA domain-containing protein 5
ENSMUSG00000017561	Crlf3	0.14537	3.26031	0.0559189	0.813067	0.999827	NS	Cytokine receptor-like factor 3
ENSMUSG00000017615	Tnfaip1	-0.0431105	6.10353	0.0187352	0.891128	0.999827	NS	tumor necrosis factor, alpha-induced protein 1 (endothelial)
ENSMUSG00000017631	Abr	-0.386915	6.29734	2.11984	0.145402	0.999827	NS	active BCR-related gene
ENSMUSG00000017639	Rab11fip4	0.870901	2.8726	1.60358	0.205397	0.999827	NS	Rab11 family-interacting protein 4
ENSMUSG00000017652	Cd40	-0.00883296	1.86055	7.90346e-05	0.992907	0.999827	NS	Tumor necrosis factor receptor superfamily member 5
ENSMUSG00000017664	Slc35c2	0.194749	5.79042	0.504498	0.47753	0.999827	NS	solute carrier family 35, member C2
ENSMUSG00000017667	Zfp334	-0.180569	4.03734	0.145259	0.703108	0.999827	NS	zinc finger protein 334
ENSMUSG00000017670	Elmo2	0.0854679	5.84602	0.103598	0.747554	0.999827	NS	Engulfment and cell motility protein 2
ENSMUSG00000017677	Wsb1	0.276013	5.02621	0.513613	0.473579	0.999827	NS	WD repeat and SOCS box-containing 1
ENSMUSG00000017679	Ttpal	-0.130612	5.55501	0.213602	0.643959	0.999827	NS	tocopherol (alpha) transfer protein-like
ENSMUSG00000017686	Rhot1	-0.147356	6.25099	0.315895	0.574085	0.999827	NS	ras homolog family member T1
ENSMUSG00000017688	Hnf4g	-1.98616	1.77807	2.09986	0.147313	0.999827	NS	hepatocyte nuclear factor 4 gamma
ENSMUSG00000017692	Rhbdl3	-0.135632	5.59455	0.259607	0.61039	0.999827	NS	Rhomboid-related protein 3
ENSMUSG00000017697	Ada	0.845503	0.00456102	0.172387	0.677999	0.999827	NS	Adenosine deaminase
ENSMUSG00000017707	Serinc3	0.0409668	8.06231	0.0135776	0.907238	0.999827	NS	Serine incorporator 3
ENSMUSG00000017713	Tha1	-0.284446	3.3024	0.184889	0.667205	0.999827	NS	threonine aldolase 1
ENSMUSG00000017715	Pgs1	-0.0910446	4.9942	0.0700599	0.79125	0.999827	NS	CDP-diacylglycerol--glycerol-3-phosphate 3-phosphatidyltransferase, mitochondrial
ENSMUSG00000017716	Birc5	-0.884638	1.3945	0.52341	0.469391	0.999827	NS	Baculoviral IAP repeat-containing protein 5
ENSMUSG00000017718	Afmid	1.22765	1.51444	1.10386	0.293421	0.999827	NS	Kynurenine formamidase
ENSMUSG00000017723	Wfdc2	1.50505	-0.118732	0.797324	0.371895	0.999827	NS	WAP four-disulfide core domain 2
ENSMUSG00000017734	Dbndd2	-0.508704	2.24065	0.35734	0.549987	0.999827	NS	Dysbindin domain-containing protein 2
ENSMUSG00000017740	Slc12a5	0.528112	1.90032	0.29099	0.589587	0.999827	NS	solute carrier family 12, member 5
ENSMUSG00000017747	Ghdc	0.333021	4.13719	0.487453	0.485066	0.999827	NS	GH3 domain-containing protein
ENSMUSG00000017754	Pltp	-0.697666	2.03489	0.220554	0.638618	0.999827	NS	phospholipid transfer protein
ENSMUSG00000017756	Slc12a7	0.279279	7.18458	0.656953	0.417638	0.999827	NS	solute carrier family 12, member 7
ENSMUSG00000017760	Ctsa	0.182753	6.8397	0.487093	0.485227	0.999827	NS	cathepsin A
ENSMUSG00000017764	Zswim1	0.356887	4.95473	0.788349	0.3746	0.999827	NS	zinc finger SWIM-type containing 1
ENSMUSG00000017765	Slc12a4	-0.849097	3.10945	1.66111	0.197454	0.999827	NS	solute carrier family 12, member 4
ENSMUSG00000017774	Myo1c	-0.307733	6.16551	1.01742	0.313131	0.999827	NS	Unconventional myosin-Ic
ENSMUSG00000017776	Crk	-0.145033	6.25384	0.244687	0.620842	0.999827	NS	Adapter molecule crk
ENSMUSG00000017778	Cox7c	0.039658	6.12946	0.0206635	0.885699	0.999827	NS	Cytochrome c oxidase subunit 7C, mitochondrial
ENSMUSG00000017781	Pitpna	-0.0601692	6.69864	0.0575285	0.810446	0.999827	NS	phosphatidylinositol transfer protein, alpha
ENSMUSG00000017801	Mlx	-0.14063	5.60844	0.257633	0.611751	0.999827	NS	MAX-like protein X
ENSMUSG00000017802	Retreg3	-0.307465	5.04038	0.75855	0.383783	0.999827	NS	Reticulophagy regulator 3
ENSMUSG00000017830	Dhx58	0.203307	1.31954	0.0321178	0.857769	0.999827	NS	Probable ATP-dependent RNA helicase DHX58
ENSMUSG00000017831	Rab5a	-0.0888138	7.73696	0.0747789	0.784502	0.999827	NS	Ras-related protein Rab-5A
ENSMUSG00000017837	Nkiras2	-0.0641397	6.07793	0.058678	0.808598	0.999827	NS	NF-kappa-B inhibitor-interacting Ras-like protein 2
ENSMUSG00000017843	Ppp2r5c	0.0551574	7.26121	0.0334604	0.854859	0.999827	NS	protein phosphatase 2, regulatory subunit B', gamma
ENSMUSG00000017858	Ift52	0.12403	5.99245	0.23082	0.630916	0.999827	NS	Intraflagellar transport
ENSMUSG00000017861	Mybl2	-1.24635	0.805506	0.713967	0.39813	0.999827	NS	Myb-related protein B
ENSMUSG00000017868	Sgk2	-0.337735	4.48515	0.775079	0.37865	0.999827	NS	Serine/threonine-protein kinase Sgk2
ENSMUSG00000017897	Eya2	-0.295217	0.951745	0.0447526	0.83246	0.999827	NS	Eyes absent homolog 2
ENSMUSG00000017929	B4galt5	0.0923006	4.90661	0.0696405	0.791861	0.999827	NS	Beta-1,4-galactosyltransferase 5
ENSMUSG00000017943	Gdap1l1	0.0739101	6.12472	0.0823865	0.774089	0.999827	NS	Ganglioside-induced differentiation-associated protein 1-like 1
ENSMUSG00000017950	Hnf4a	-0.480225	6.00661	3.49778	0.0614512	0.999827	NS	Hepatocyte nuclear factor 4-alpha
ENSMUSG00000017978	Cadps2	-0.0976235	4.03836	0.0386872	0.84407	0.999827	NS	Calcium-dependent secretion activator 2
ENSMUSG00000017999	Ddx27	0.275375	4.97596	0.620195	0.430975	0.999827	NS	Probable ATP-dependent RNA helicase DDX27
ENSMUSG00000018001	Cyth3	-0.147664	5.27544	0.202509	0.652704	0.999827	NS	Cytohesin-3
ENSMUSG00000018008	Cyth4	0.438648	2.93658	0.377959	0.538698	0.999827	NS	Cytohesin-4
ENSMUSG00000018012	Rac3	-0.142562	0.427788	0.00989606	0.920758	0.999827	NS	RAS-related C3 botulinum substrate 3
ENSMUSG00000018040	Rrp7a	-0.22644	5.50644	0.670877	0.412746	0.999827	NS	Ribosomal RNA-processing A
ENSMUSG00000018042	Cyb5r3	0.0625743	9.88048	0.00880417	0.925244	0.999827	NS	NADH-cytochrome b5 reductase 3 NADH-cytochrome b5 reductase 3 membrane-bound form NADH-cytochrome b5
ENSMUSG00000018068	Ints2	-0.180908	5.09655	0.305211	0.580634	0.999827	NS	Integrator complex subunit 2
ENSMUSG00000018076	Med13l	-0.518426	4.02697	1.11007	0.292066	0.999827	NS	mediator of RNA polymerase II transcription subunit 13-like isoform 1
ENSMUSG00000018102	Hist1h2bc	0.0994507	6.711	0.139137	0.709141	0.999827	NS	Histone H2B type 1-C/E/G
ENSMUSG00000018126	Baiap2l2	-0.818686	-0.0557413	0.170497	0.679671	0.999827	NS	Brain-specific angiosis inhibitor 1-associated protein 2-like protein 2
ENSMUSG00000018143	Mafk	0.151644	5.66661	0.236969	0.626404	0.999827	NS	v-maf musculoaponeurotic fibrosarcoma oncogene family, protein K (avian)
ENSMUSG00000018160	Med1	0.168054	5.35443	0.210781	0.646156	0.999827	NS	Mediator of RNA polymerase II transcription subunit 1
ENSMUSG00000018166	Erbb3	-0.235737	2.79768	0.0866547	0.768474	0.999827	NS	Receptor tyrosine-protein kinase erbB-3
ENSMUSG00000018167	Stard3	-0.539745	3.95421	1.32198	0.250237	0.999827	NS	START domain containing 3
ENSMUSG00000018168	Ikzf3	0.273156	2.07539	0.0830841	0.773161	0.999827	NS	Zinc finger protein Aiolos
ENSMUSG00000018169	Mfng	-0.241063	5.1391	0.393601	0.530413	0.999827	NS	Beta-1,3-N-acetylglucosaminyltransferase manic fringe
ENSMUSG00000018171	Vmp1	-0.235803	6.01531	0.787443	0.374874	0.999827	NS	vacuole membrane protein 1
ENSMUSG00000018189	Uchl5	0.26934	4.59807	0.48172	0.487644	0.999827	NS	ubiquitin carboxyl-terminal esterase L5
ENSMUSG00000018196	Glrx2	-0.0140768	4.80225	0.00160938	0.968	0.999827	NS	Glutaredoxin-2, mitochondrial
ENSMUSG00000018199	Trove2	0.0666964	6.02397	0.0625441	0.802519	0.999827	NS	TROVE domain family, member 2
ENSMUSG00000018209	Stk4	0.198195	5.83794	0.54821	0.45905	0.999827	NS	serine/threonine kinase 4
ENSMUSG00000018217	Pmp22	-0.00533066	4.67081	0.000186657	0.989099	0.999827	NS	peripheral myelin protein 22 isoform 2
ENSMUSG00000018239	Zcchc10	0.0547694	3.25679	0.00832982	0.92728	0.999827	NS	zinc finger, CCHC domain containing 10
ENSMUSG00000018286	Psmb6	0.0886745	6.9312	0.114137	0.735483	0.999827	NS	Proteasome subunit beta type-6
ENSMUSG00000018287	Spag7	0.123172	5.8376	0.211145	0.645872	0.999827	NS	Sperm-associated antigen 7
ENSMUSG00000018293	Pfn1	0.0271324	6.87641	0.0107578	0.917392	0.999827	NS	profilin 1
ENSMUSG00000018322	Tomm34	0.0973412	6.1991	0.13667	0.711614	0.999827	NS	Mitochondrial import receptor subunit TOM34
ENSMUSG00000018326	Ywhab	0.00175458	7.5199	3.48039e-05	0.995293	0.999827	NS	tyrosine 3-monooxygenase/tryptophan 5-monooxygenase activation protein, beta polypeptide
ENSMUSG00000018339	Gpx3	0.272742	8.10032	0.411395	0.521262	0.999827	NS	Glutathione peroxidase 3
ENSMUSG00000018340	Anxa6	0.0074175	7.58865	0.000575468	0.980861	0.999827	NS	Annexin A6
ENSMUSG00000018347	Zkscan6	-0.122523	4.28355	0.078684	0.779089	0.999827	NS	zinc finger with KRAB and SCAN domains 6
ENSMUSG00000018362	Kpna2	-0.0353694	7.29117	0.014191	0.905175	0.999827	NS	Importin subunit alpha-1
ENSMUSG00000018363	Smurf2	-0.577071	4.46314	1.93042	0.164713	0.999827	NS	E3 ubiquitin-protein ligase SMURF2
ENSMUSG00000018372	Cep95	-0.220889	2.1716	0.0648357	0.79901	0.999827	NS	Centrosomal protein of 95 kDa
ENSMUSG00000018377	Vezf1	0.0622205	6.51497	0.0546316	0.815191	0.999827	NS	vascular endothelial zinc finger 1
ENSMUSG00000018378	Cuedc1	0.0790004	5.1966	0.048653	0.825424	0.999827	NS	CUE domain-containing protein 1
ENSMUSG00000018379	Srsf1	-0.198755	5.64043	0.279614	0.596954	0.999827	NS	Serine/arginine-rich splicing factor 1
ENSMUSG00000018387	Shroom1	0.0578755	0.587115	0.00171749	0.966943	0.999827	NS	shroom family member 1
ENSMUSG00000018395	Kif3a	-0.3146	4.39983	0.573395	0.448913	0.999827	NS	Kinesin-like protein KIF3A
ENSMUSG00000018398	Sept8	-0.811383	3.5853	2.12411	0.144997	0.999827	NS	Mus musculus septin 8 (Sept8), transcript variant 4, mRNA.
ENSMUSG00000018401	Mtmr4	-0.213039	6.34565	0.713756	0.3982	0.999827	NS	Mus musculus myotubularin related protein 4 (Mtmr4), transcript variant 2, mRNA.
ENSMUSG00000018405	Mrm1	0.0952921	4.61155	0.0628311	0.802076	0.999827	NS	rRNA methyltransferase 1, mitochondrial
ENSMUSG00000018411	Mapt	-0.0520746	5.43087	0.0288942	0.865023	0.999827	NS	Microtubule-associated protein tau
ENSMUSG00000018412	Kansl1	-0.0771051	6.23141	0.0840691	0.771857	0.999827	NS	KAT8 regulatory NSL complex subunit 1
ENSMUSG00000018417	Myo1b	0.253783	5.79537	0.856109	0.35483	0.999827	NS	myosin IB
ENSMUSG00000018425	Dhx40	0.036593	5.96832	0.0195736	0.888735	0.999827	NS	Probable ATP-dependent RNA helicase DHX40
ENSMUSG00000018427	Ypel2	0.119932	3.09055	0.034022	0.85366	0.999827	NS	yippee like 2
ENSMUSG00000018428	Akap1	0.133589	3.51869	0.050736	0.821788	0.999827	NS	A-kinase anchor protein 1, mitochondrial
ENSMUSG00000018433	Nol11	0.0162643	5.53748	0.00301116	0.956239	0.999827	NS	Nucleolar protein 11
ENSMUSG00000018442	Derl2	-0.43113	7.42952	1.78761	0.181218	0.999827	NS	Derlin-2
ENSMUSG00000018446	C1qbp	0.0264645	5.12618	0.0068126	0.934219	0.999827	NS	complement C1q binding protein
ENSMUSG00000018449	Rpain	0.185565	2.16802	0.045339	0.831382	0.999827	NS	RPA interacting protein
ENSMUSG00000018451	6330403K07Rik	0.833793	4.28957	3.66018	0.0557277	0.999827	NS	RIKEN cDNA 6330403K07 gene
ENSMUSG00000018470	Kcnab3	-0.220137	4.40387	0.21646	0.641751	0.999827	NS	potassium voltage-gated channel subfamily A regulatory beta subunit 3
ENSMUSG00000018474	Chd3	-0.0585219	5.45873	0.0407619	0.839998	0.999827	NS	chromodomain helicase DNA binding protein 3
ENSMUSG00000018476	Kdm6b	0.0676441	2.99319	0.0099175	0.920673	0.999827	NS	Lysine-specific demethylase 6B
ENSMUSG00000018481	Appbp2	0.064255	6.7237	0.0620995	0.803208	0.999827	NS	Amyloid protein-binding protein 2
ENSMUSG00000018500	Adora2b	0.913776	4.20442	4.15965	0.0413979	0.999827	NS	adenosine A2b receptor
ENSMUSG00000018501	Ncor1	0.142607	7.44899	0.227748	0.633198	0.999827	NS	nuclear receptor co-repressor 1
ENSMUSG00000018509	Cenpv	0.0670029	4.26186	0.0250188	0.87432	0.999827	NS	Centromere protein V
ENSMUSG00000018537	Pcgf2	0.385202	0.440221	0.0721126	0.788285	0.999827	NS	Polycomb group RING finger protein 2
ENSMUSG00000018541	Cwc25	0.428974	5.22105	1.71945	0.189764	0.999827	NS	Pre-mRNA-splicing factor CWC25 homolog
ENSMUSG00000018547	Pip4k2b	-0.358665	0.204436	0.0545842	0.81527	0.999827	NS	Phosphatidylinositol 5-phosphate 4-kinase type-2 beta
ENSMUSG00000018548	Trim37	-0.0647552	6.81868	0.0589113	0.808225	0.999827	NS	E3 ubiquitin-protein ligase TRIM37
ENSMUSG00000018559	Ctdnep1	0.271355	2.60849	0.131131	0.717262	0.999827	NS	CTD nuclear envelope phosphatase 1
ENSMUSG00000018565	Elp5	0.115641	5.10867	0.129584	0.718863	0.999827	NS	Elongator complex protein 5
ENSMUSG00000018567	Gabarap	-0.064323	7.35208	0.04473	0.832501	0.999827	NS	Gamma-aminobutyric acid receptor-associated protein
ENSMUSG00000018569	Cldn7	0.52453	6.71978	3.18173	0.0744657	0.999827	NS	Claudin-7
ENSMUSG00000018570	2810408A11Rik	1.11703	0.682968	0.62244	0.430142	0.999827	NS	RIKEN cDNA 2810408A11 gene
ENSMUSG00000018572	Phf23	0.57558	5.37378	3.75049	0.052792	0.999827	NS	PHD finger protein 23
ENSMUSG00000018574	Acadvl	-0.162566	6.4275	0.426713	0.513606	0.999827	NS	acyl-Coenzyme A dehydrogenase, very long chain
ENSMUSG00000018581	Dnah11	1.39084	1.74652	1.63596	0.20088	0.999827	NS	dynein axonemal heavy chain 11
ENSMUSG00000018583	G3bp1	0.0592068	7.88976	0.0315031	0.859123	0.999827	NS	Ras GTPase-activating protein-binding protein 1
ENSMUSG00000018585	Atox1	0.402571	4.27199	0.811789	0.367592	0.999827	NS	Copper transport protein ATOX1
ENSMUSG00000018593	Sparc	-0.996453	7.06134	2.53188	0.111567	0.999827	NS	secreted acidic cysteine rich glycoprotein
ENSMUSG00000018599	Mief2	-0.76447	2.69743	1.1086	0.292387	0.999827	NS	Mitochondrial dynamics protein MID49
ENSMUSG00000018648	Dusp14	0.384608	2.91508	0.32869	0.566431	0.999827	NS	Dual specificity protein phosphatase 14
ENSMUSG00000018651	Tada2a	-0.747202	3.47267	1.60528	0.205157	0.999827	NS	Transcriptional adapter 2-alpha
ENSMUSG00000018659	Pnpo	-0.836225	4.62764	3.58565	0.0582807	0.999827	NS	Pyridoxine-5'-phosphate oxidase
ENSMUSG00000018661	Cog1	-0.131377	7.10325	0.213654	0.643918	0.999827	NS	Conserved oligomeric Golgi complex subunit 1
ENSMUSG00000018666	Cbx1	0.175806	4.68816	0.240796	0.623632	0.999827	NS	Chromobox protein homolog 1
ENSMUSG00000018669	Cdk5rap3	0.033833	7.08904	0.013688	0.906863	0.999827	NS	CDK5 regulatory subunit-associated protein 3
ENSMUSG00000018672	Copz2	-0.0698641	4.09486	0.0241111	0.876602	0.999827	NS	Coatomer subunit zeta-2
ENSMUSG00000018677	Slc25a39	-0.0487432	7.69801	0.0233229	0.87862	0.999827	NS	Solute carrier family 25 member 39
ENSMUSG00000018678	Sp2	0.0135329	4.29998	0.00104337	0.974232	0.999827	NS	Sp2 transcription factor
ENSMUSG00000018697	Aatf	-0.275076	4.28362	0.424831	0.514536	0.999827	NS	apoptosis antagonizing transcription factor
ENSMUSG00000018698	Lhx1	0.362114	3.24754	0.279651	0.59693	0.999827	NS	LIM/homeobox protein Lhx1
ENSMUSG00000018707	Dync1h1	0.0928936	6.52627	0.133526	0.714804	0.999827	NS	Cytoplasmic dynein 1 heavy chain 1
ENSMUSG00000018733	Pex12	0.452303	4.47348	1.26281	0.26112	0.999827	NS	Peroxisome assembly protein 12
ENSMUSG00000018736	Ndel1	0.0782664	6.93115	0.0876382	0.767201	0.999827	NS	Nuclear distribution protein nudE-like 1
ENSMUSG00000018740	Slc25a35	0.643624	3.36588	1.13758	0.286163	0.999827	NS	Solute carrier family 25 member 35
ENSMUSG00000018750	Zbtb4	0.214511	3.20367	0.101227	0.750362	0.999827	NS	zinc finger and BTB domain containing 4
ENSMUSG00000018752	Tnfsfm13	0.556548	2.02387	0.358825	0.549159	0.999827	NS	tumor necrosis factor (ligand) superfamily, membrane-bound member 13
ENSMUSG00000018761	Mpdu1	0.127623	3.69844	0.0610947	0.804774	0.999827	NS	mannose-P-dolichol utilization defect 1
ENSMUSG00000018765	Fxr2	-0.0546503	6.45592	0.0458722	0.830408	0.999827	NS	FMR1 autosomal homolog 2
ENSMUSG00000018770	Atp5g3	0.00217639	7.27161	5.6096e-05	0.994024	0.999827	NS	ATP synthase F(0) complex subunit C3, mitochondrial
ENSMUSG00000018796	Acsl1	0.413543	4.57966	1.26911	0.259933	0.999827	NS	Long-chain-fatty-acid--CoA ligase 1
ENSMUSG00000018800	Abca5	-0.123311	6.39714	0.188304	0.664332	0.999827	NS	ATP-binding cassette, sub-family A (ABC1), member 5
ENSMUSG00000018809	Smyd4	0.34834	4.78785	0.96787	0.325212	0.999827	NS	SET and MYND domain-containing protein 4
ENSMUSG00000018819	Lsp1	0.210614	2.28112	0.0398922	0.841692	0.999827	NS	Lymphocyte-specific protein 1
ENSMUSG00000018820	Zfyve27	0.0301399	5.81129	0.0120768	0.912493	0.999827	NS	zinc finger, FYVE domain containing 27
ENSMUSG00000018821	Avpi1	-0.0308809	1.67933	0.000885191	0.976265	0.999827	NS	Arginine vasopressin-induced protein 1
ENSMUSG00000018822	Sfrp5	0.849401	3.87288	2.24154	0.134348	0.999827	NS	secreted frizzled-related sequence protein 5
ENSMUSG00000018830	Myh11	-0.590219	4.89631	0.174945	0.675754	0.999827	NS	myosin heavy chain 11
ENSMUSG00000018841	Rad51d	0.0367927	3.58025	0.0043656	0.94732	0.999827	NS	RAD51 paralog D
ENSMUSG00000018846	Pank3	-0.440968	5.87633	2.26332	0.13247	0.999827	NS	pantothenate kinase 3
ENSMUSG00000018848	Rars	-0.0454661	6.04328	0.0318397	0.85838	0.999827	NS	Arginine--tRNA ligase, cytoplasmic
ENSMUSG00000018849	Wwc1	0.435613	3.91351	0.617235	0.432077	0.999827	NS	WW, C2 and coiled-coil domain containing 1
ENSMUSG00000018858	Mrpl58	-0.0580205	4.80777	0.0277593	0.867676	0.999827	NS	Mus musculus mitochondrial ribosomal protein L58 (Mrpl58), transcript variant 2, mRNA.
ENSMUSG00000018861	Fdxr	0.207005	3.11003	0.103489	0.747682	0.999827	NS	ferredoxin reductase
ENSMUSG00000018865	Sult4a1	-0.78404	2.26548	0.822079	0.364573	0.999827	NS	Sulfotransferase 4A1
ENSMUSG00000018882	Mrpl45	0.120132	3.75221	0.0472623	0.827897	0.999827	NS	39S ribosomal protein L45, mitochondrial
ENSMUSG00000018900	Slc22a5	-1.03489	3.15292	2.39713	0.121558	0.999827	NS	solute carrier family 22 (organic cation transporter), member 5
ENSMUSG00000018906	P4ha2	-0.466761	4.39859	0.553355	0.45695	0.999827	NS	Prolyl 4-hydroxylase subunit alpha-2
ENSMUSG00000018920	Cxcl16	0.607284	3.5339	1.04351	0.307006	0.999827	NS	C-X-C motif chemokine 16
ENSMUSG00000018921	Pelp1	-0.0236956	3.30385	0.00151279	0.968974	0.999827	NS	Proline-, glutamic acid- and leucine-rich protein 1
ENSMUSG00000018923	Med11	0.232033	3.61815	0.184462	0.667566	0.999827	NS	Mediator of RNA polymerase II transcription subunit 11
ENSMUSG00000018927	Ccl6	-1.33182	0.926456	0.591685	0.441768	0.999827	NS	C-C motif chemokine 6 CCL6(22-95) CCL6(23-95)
ENSMUSG00000018931	Natd1	0.0437746	4.25732	0.0105141	0.918329	0.999827	NS	Protein NATD1
ENSMUSG00000018932	Map2k3	-0.0141447	5.01004	0.0015122	0.96898	0.999827	NS	mitogen-activated protein kinase kinase 3
ENSMUSG00000018965	Ywhah	0.209135	7.96043	0.376437	0.539516	0.999827	NS	tyrosine 3-monooxygenase/tryptophan 5-monooxygenase activation protein, eta polypeptide
ENSMUSG00000018974	Sart3	0.0726795	5.93668	0.0728395	0.787247	0.999827	NS	Mus musculus squamous cell carcinoma antigen recognized by T cells 3 (Sart3), transcript variant 3,
ENSMUSG00000018983	E2f2	-0.223823	2.35887	0.0620326	0.803312	0.999827	NS	Transcription factor E2F2
ENSMUSG00000018995	Nars2	-0.118676	4.45793	0.0847101	0.771013	0.999827	NS	Probable asparagine--tRNA ligase, mitochondrial
ENSMUSG00000018999	Slc35b4	0.313266	7.17044	1.08934	0.296618	0.999827	NS	UDP-xylose and UDP-N-acetylglucosamine transporter
ENSMUSG00000019039	Dalrd3	-0.110927	4.7376	0.0952909	0.757556	0.999827	NS	DALR anticodon-binding domain-containing protein 3
ENSMUSG00000019054	Fis1	-0.0942721	5.98617	0.125242	0.723417	0.999827	NS	Mitochondrial fission 1 protein
ENSMUSG00000019055	Plod1	0.301174	4.94154	0.695531	0.404289	0.999827	NS	Procollagen-lysine,2-oxoglutarate 5-dioxygenase 1
ENSMUSG00000019066	Rab3d	-0.225149	7.99439	0.398165	0.528038	0.999827	NS	RAB3D, member RAS oncogene family
ENSMUSG00000019080	Mfsd3	0.515528	2.16507	0.288947	0.590896	0.999827	NS	major facilitator superfamily domain containing 3
ENSMUSG00000019082	Slc25a22	0.0730486	5.68632	0.0582953	0.809211	0.999827	NS	solute carrier family 25 (mitochondrial carrier, glutamate), member 22
ENSMUSG00000019087	Atp6ap1	0.00440623	8.27133	0.000131078	0.990865	0.999827	NS	ATPase, H+ transporting, lysosomal accessory protein 1
ENSMUSG00000019088	Dnase1l1	-0.262553	0.774596	0.039019	0.843411	0.999827	NS	Deoxyribonuclease-1-like 1
ENSMUSG00000019124	Scrn1	-0.347987	7.04848	1.51768	0.21797	0.999827	NS	Secernin-1
ENSMUSG00000019132	BC005537	0.544849	4.55559	1.89402	0.16875	0.999827	NS	Uncharacterized
ENSMUSG00000019139	Isyna1	-0.326685	5.32929	1.20841	0.271647	0.999827	NS	Inositol-3-phosphate synthase 1
ENSMUSG00000019143	Hars2	-0.405006	4.53055	1.0765	0.299481	0.999827	NS	Probable histidine--tRNA ligase, mitochondrial
ENSMUSG00000019158	Tmem160	-0.178679	3.54394	0.10563	0.745176	0.999827	NS	Transmembrane protein 160
ENSMUSG00000019173	Rab5c	-0.160747	3.14845	0.061112	0.804747	0.999827	NS	RAB5C, member RAS oncogene family
ENSMUSG00000019179	Mdh2	-0.0122676	8.1082	0.00118279	0.972565	0.999827	NS	Malate dehydrogenase, mitochondrial
ENSMUSG00000019188	H13	-0.292294	7.28125	0.996329	0.3182	0.999827	NS	Minor histocompatibility antigen H13
ENSMUSG00000019189	Rnf145	0.00590131	7.95366	0.000298644	0.986212	0.999827	NS	ring finger protein 145
ENSMUSG00000019194	Scn1b	-0.0726975	2.56688	0.00919171	0.923621	0.999827	NS	Sodium channel subunit beta-1
ENSMUSG00000019210	Atp6v1e1	-0.0277934	8.33699	0.00485741	0.944436	0.999827	NS	ATPase, H+ transporting, lysosomal V1 subunit E1
ENSMUSG00000019214	Chtf18	1.38806	2.79178	3.07757	0.0793793	0.999827	NS	chromosome transmission fidelity factor 18
ENSMUSG00000019235	Rps6kl1	0.1625	3.57663	0.0868435	0.768229	0.999827	NS	ribosomal protein S6 kinase-like 1
ENSMUSG00000019254	Ppp1r12c	-0.0217571	5.34233	0.00505315	0.94333	0.999827	NS	Protein phosphatase 1 regulatory subunit 12C
ENSMUSG00000019256	Ahr	0.163389	3.24412	0.0620795	0.803239	0.999827	NS	aryl hydrocarbon receptor isoform 2
ENSMUSG00000019261	Map1s	-0.323535	5.44648	1.20797	0.271734	0.999827	NS	Microtubule-associated protein 1S MAP1S heavy chain MAP1S light chain
ENSMUSG00000019278	Dpep1	0.20452	-0.817071	0.00657734	0.935362	0.999827	NS	Dipeptidase 1
ENSMUSG00000019295	Tmem129	-0.0598983	5.27572	0.0344364	0.852782	0.999827	NS	E3 ubiquitin-protein ligase TM129
ENSMUSG00000019297	Nop9	0.267021	4.92164	0.604725	0.436781	0.999827	NS	Nucleolar protein 9
ENSMUSG00000019302	Atp6v0a1	-0.186581	7.40552	0.360072	0.548466	0.999827	NS	ATPase, H+ transporting, lysosomal V0 subunit A1
ENSMUSG00000019303	Psmc3ip	0.460815	1.93175	0.168056	0.681846	0.999827	NS	proteasome (prosome, macropain) 26S subunit, ATPase 3, interacting protein
ENSMUSG00000019312	Grb7	-0.0988595	5.61779	0.135122	0.71318	0.999827	NS	Growth factor receptor-bound protein 7
ENSMUSG00000019320	Noxo1	-0.791274	2.87686	1.35244	0.244851	0.999827	NS	NADPH oxidase organizer 1
ENSMUSG00000019326	Aoc3	-0.441614	1.35347	0.0731131	0.786857	0.999827	NS	Membrane primary amine oxidase
ENSMUSG00000019338	Zfp687	-0.219372	5.92331	0.57487	0.44833	0.999827	NS	zinc finger protein 687
ENSMUSG00000019362	D8Ertd738e	-0.150469	4.82736	0.182525	0.669212	0.999827	NS	Leydig cell tumor 10 kDa protein homolog
ENSMUSG00000019368	Sec14l4	-0.45051	2.46135	0.313603	0.575478	0.999827	NS	SEC14-like protein 4
ENSMUSG00000019370	Calm3	0.202855	6.67299	0.556882	0.455519	0.999827	NS	Calmodulin-1
ENSMUSG00000019373	Cops3	-0.113566	7.04249	0.165953	0.683734	0.999827	NS	COP9 signalosome complex subunit 3
ENSMUSG00000019428	Fkbp8	-0.0216247	6.818	0.00686128	0.933984	0.999827	NS	Peptidyl-prolyl cis-trans isomerase FKBP8
ENSMUSG00000019429	Ffar3	0.0986359	1.81916	0.0095891	0.921993	0.999827	NS	Free fatty acid receptor 3
ENSMUSG00000019432	Ddx39b	0.148469	6.66455	0.345967	0.556405	0.999827	NS	Spliceosome RNA helicase Ddx39b
ENSMUSG00000019433	Gipc1	0.0297372	5.01522	0.00774089	0.929891	0.999827	NS	PDZ domain-containing protein GIPC1
ENSMUSG00000019437	Tlcd1	-0.234112	2.84814	0.101039	0.750586	0.999827	NS	Calfacilitin
ENSMUSG00000019461	Plscr3	0.172359	5.08966	0.288132	0.59142	0.999827	NS	Phospholipid scramblase 3
ENSMUSG00000019464	Ptger1	0.900777	1.12534	0.57051	0.450056	0.999827	NS	Prostaglandin E2 receptor EP1 subtype
ENSMUSG00000019467	Arhgef25	0.236322	1.77479	0.0456741	0.830769	0.999827	NS	Mus musculus Rho guanine nucleotide exchange factor (GEF) 25 (Arhgef25), transcript variant 3, mRNA.
ENSMUSG00000019470	Xab2	0.0354444	5.99986	0.0191035	0.89007	0.999827	NS	XPA binding protein 2
ENSMUSG00000019471	Cdc37	0.0842806	6.63295	0.115853	0.733577	0.999827	NS	Hsp90 co-chaperone Cdc37 Hsp90 co-chaperone Cdc37, N-terminally processed
ENSMUSG00000019478	Rab4a	0.105936	5.30668	0.119814	0.729237	0.999827	NS	Ras-related protein Rab-4A
ENSMUSG00000019487	Trip10	0.860498	1.72442	0.665259	0.41471	0.999827	NS	thyroid hormone receptor interactor 10
ENSMUSG00000019494	Cops6	0.0711951	5.96978	0.0720471	0.788379	0.999827	NS	COP9 signalosome complex subunit 6
ENSMUSG00000019505	Ubb	0.151937	11.603	0.0241155	0.876591	0.999827	NS	ubiquitin B
ENSMUSG00000019518	Ap4m1	-1.43575	2.21009	2.59196	0.107408	0.999827	NS	AP-4 complex subunit mu-1
ENSMUSG00000019528	Gyg	-0.393034	4.93542	1.24203	0.265081	0.999827	NS	glycogenin
ENSMUSG00000019539	Rcn3	-0.306489	3.90552	0.201593	0.653438	0.999827	NS	Mus musculus reticulocalbin 3, EF-hand calcium binding domain (Rcn3), transcript variant 2, mRNA.
ENSMUSG00000019558	Slc6a8	0.029726	0.998976	0.000572707	0.980907	0.999827	NS	solute carrier family 6 (neurotransmitter transporter, creatine), member 8
ENSMUSG00000019564	Arid3a	0.226604	3.77777	0.20298	0.652326	0.999827	NS	AT-rich interactive domain-containing protein 3A
ENSMUSG00000019578	Ubxn6	0.0572123	5.87716	0.0424639	0.836738	0.999827	NS	UBX domain protein 6
ENSMUSG00000019579	Mydgf	-0.291672	6.19261	1.15008	0.283532	0.999827	NS	Myeloid-derived growth factor
ENSMUSG00000019590	Cyb561	0.0706146	6.76237	0.0691674	0.792553	0.999827	NS	Cytochrome b561
ENSMUSG00000019647	Sema6a	0.972026	1.31663	0.724822	0.394567	0.999827	NS	Semaphorin-6A
ENSMUSG00000019659	Ccdc12	-0.190514	5.41964	0.442578	0.505881	0.999827	NS	Coiled-coil domain-containing protein 12
ENSMUSG00000019689	Fmc1	0.0860306	2.94998	0.0167519	0.897018	0.999827	NS	formation of mitochondrial complex V assembly factor 1 homolog
ENSMUSG00000019699	Akt3	0.0630938	4.94392	0.0317166	0.858651	0.999827	NS	RAC-gamma serine/threonine-protein kinase
ENSMUSG00000019710	Mrpl24	-0.146571	4.72927	0.150206	0.698338	0.999827	NS	39S ribosomal protein L24, mitochondrial
ENSMUSG00000019715	Gle1	0.360073	5.55834	1.68505	0.194255	0.999827	NS	Nucleoporin GLE1
ENSMUSG00000019718	L3hypdh	-1.35108	0.538052	0.558275	0.454956	0.999827	NS	Trans-L-3-hydroxyproline dehydratase
ENSMUSG00000019726	Lyst	-0.269847	3.73749	0.237194	0.62624	0.999827	NS	lysosomal trafficking regulator
ENSMUSG00000019731	Slc35e1	-0.211201	6.75144	0.69882	0.40318	0.999827	NS	Solute carrier family 35 member E1
ENSMUSG00000019734	Tmc4	-0.0114204	6.40275	0.00205594	0.963834	0.999827	NS	transmembrane channel like 4
ENSMUSG00000019737	Syne4	-0.0325413	4.62642	0.0070229	0.933213	0.999827	NS	Nesprin-4
ENSMUSG00000019738	Polr2i	0.436664	3.83146	0.815708	0.366438	0.999827	NS	DNA-directed RNA polymerase II subunit RPB9
ENSMUSG00000019761	Krt10	0.0493361	3.24257	0.006431	0.936083	0.999827	NS	keratin 10
ENSMUSG00000019762	Iyd	-1.64466	0.544641	1.23871	0.26572	0.999827	NS	Iodotyrosine deiodinase 1
ENSMUSG00000019763	Rmnd1	0.068643	4.01903	0.0226077	0.880482	0.999827	NS	Required for meiotic nuclear division
ENSMUSG00000019773	Fbxo5	-0.0236355	2.55093	0.000856165	0.976657	0.999827	NS	F-box only protein 5
ENSMUSG00000019774	Mtrf1l	0.206121	3.60429	0.143362	0.704961	0.999827	NS	Peptide chain release factor 1-like, mitochondrial
ENSMUSG00000019775	Rgs17	0.430768	3.77941	0.700126	0.402741	0.999827	NS	regulator of G-protein signaling 17
ENSMUSG00000019777	Hdac2	-0.0201669	7.33954	0.00451543	0.946425	0.999827	NS	histone deacetylase 2
ENSMUSG00000019779	Frk	-0.58561	4.48705	2.31876	0.127822	0.999827	NS	Mus musculus fyn-related kinase (Frk), transcript variant 3, mRNA.
ENSMUSG00000019782	Rwdd1	-0.0488047	6.34933	0.030632	0.861064	0.999827	NS	RWD domain-containing protein 1
ENSMUSG00000019790	Stxbp5	0.000765554	5.53668	5.6256e-06	0.998108	0.999827	NS	Syntaxin-binding protein 5
ENSMUSG00000019791	Hint3	0.162053	3.75963	0.0960322	0.756644	0.999827	NS	Histidine triad nucleotide-binding protein 3
ENSMUSG00000019792	Trmt11	0.0867151	4.1193	0.0358654	0.849794	0.999827	NS	tRNA methyltransferase 11
ENSMUSG00000019794	Katna1	0.0218773	5.77063	0.00637378	0.936368	0.999827	NS	katanin catalytic subunit A1
ENSMUSG00000019795	Pcmt1	0.141759	7.01015	0.250837	0.616486	0.999827	NS	protein-L-isoaspartate (D-aspartate) O-methyltransferase 1
ENSMUSG00000019796	Lrp11	-0.0225239	8.93258	0.00194871	0.964789	0.999827	NS	Low-density lipoprotein receptor-related protein 11
ENSMUSG00000019797	1700021F05Rik	-0.138756	3.36872	0.0573912	0.810668	0.999827	NS	RIKEN cDNA 1700021F05 gene
ENSMUSG00000019802	Sec63	-0.242646	6.99921	0.744719	0.388153	0.999827	NS	Mus musculus SEC63-like (S. cerevisiae) (Sec63), transcript variant 2, mRNA.
ENSMUSG00000019804	Snx3	0.0400274	6.93768	0.0228564	0.879831	0.999827	NS	sorting nexin 3
ENSMUSG00000019806	Aig1	-0.322448	6.02005	1.51928	0.217729	0.999827	NS	Mus musculus androgen-induced 1 (Aig1), transcript variant 2, mRNA.
ENSMUSG00000019809	Pex3	0.195498	5.66067	0.518794	0.471356	0.999827	NS	Peroxisomal biosis factor 3
ENSMUSG00000019810	Fuca2	-0.445238	5.43898	2.41667	0.12005	0.999827	NS	Mus musculus fucosidase, alpha-L- 2, plasma (Fuca2), transcript variant 2, mRNA.
ENSMUSG00000019813	Cep57l1	0.729042	2.72472	0.997015	0.318034	0.999827	NS	centrosomal protein CEP57L1 isoform 3
ENSMUSG00000019814	Ltv1	-0.0754292	5.49277	0.0728323	0.787257	0.999827	NS
ENSMUSG00000019817	Plagl1	-0.744536	3.49632	1.77232	0.183096	0.999827	NS
ENSMUSG00000019818	Cd164	-0.0168845	10.3211	0.000518611	0.981831	0.999827	NS	Sialomucin core protein 24
ENSMUSG00000019820	Utrn	-0.251352	5.47609	0.764832	0.381821	0.999827	NS	utrophin
ENSMUSG00000019822	Smpd2	-0.284498	5.10587	0.741368	0.389223	0.999827	NS	sphingomyelin phosphodiesterase 2, neutral
ENSMUSG00000019823	Mical1	-0.983679	0.909718	0.587161	0.443519	0.999827	NS	Mus musculus microtubule associated monooxygenase, calponin and LIM domain containing 1 (Mical1), tr
ENSMUSG00000019826	Zbtb24	0.0649666	5.48878	0.0494646	0.823998	0.999827	NS	zinc finger and BTB domain containing 24
ENSMUSG00000019828	Grm1	-0.284501	1.11997	0.0546394	0.815178	0.999827	NS	Metabotropic glutamate receptor 1
ENSMUSG00000019831	Wasf1	0.260277	2.62915	0.11154	0.738398	0.999827	NS	WAS protein family, member 1
ENSMUSG00000019832	Rab32	-0.289637	0.662693	0.0258822	0.872188	0.999827	NS	RAB32, member RAS oncogene family
ENSMUSG00000019837	Gtf3c6	0.313449	4.39729	0.530774	0.466282	0.999827	NS	ral transcription factor 3C polypeptide 6
ENSMUSG00000019838	Slc16a10	0.156558	5.57118	0.218597	0.640111	0.999827	NS	solute carrier family 16 (monocarboxylic acid transporters), member 10
ENSMUSG00000019841	Rev3l	-0.271681	5.54313	0.971138	0.324396	0.999827	NS	DNA polymerase zeta catalytic subunit
ENSMUSG00000019842	Traf3ip2	0.137516	4.26942	0.102842	0.748445	0.999827	NS	TRAF3 interacting protein 2
ENSMUSG00000019843	Fyn	-0.44358	4.21329	0.951673	0.329294	0.999827	NS	Tyrosine-protein kinase Fyn
ENSMUSG00000019845	Tube1	0.997185	1.42818	0.669813	0.413117	0.999827	NS	epsilon-tubulin 1
ENSMUSG00000019849	Prep	-0.133507	6.61039	0.283285	0.594556	0.999827	NS	prolyl endopeptidase
ENSMUSG00000019851	Perp	0.0382818	4.53139	0.00970228	0.921535	0.999827	NS	p53 apoptosis effector related to PMP-22
ENSMUSG00000019852	Arfgef3	-0.399495	6.71388	2.04035	0.153174	0.999827	NS	Brefeldin A-inhibited guanine nucleotide-exchange protein 3
ENSMUSG00000019854	Reps1	0.326929	6.59971	1.48603	0.222833	0.999827	NS	RalBP1-associated Eps domain-containing protein 1
ENSMUSG00000019856	Fam184a	0.579265	3.63356	1.14562	0.284468	0.999827	NS	family with sequence similarity 184 member A
ENSMUSG00000019857	Asf1a	0.118899	4.54006	0.100258	0.751521	0.999827	NS	Histone chaperone ASF1A
ENSMUSG00000019861	Gopc	-0.0373482	5.97598	0.0142805	0.904878	0.999827	NS	golgi associated PDZ and coiled-coil motif containing
ENSMUSG00000019863	Qrsl1	-0.0759916	3.31321	0.010752	0.917414	0.999827	NS	glutaminyl-tRNA synthase (glutamine-hydrolyzing)-like 1
ENSMUSG00000019864	Rtn4ip1	0.0397044	4.89832	0.00920705	0.923558	0.999827	NS	reticulon 4 interacting protein 1
ENSMUSG00000019868	Vta1	0.257597	5.60671	0.963005	0.326431	0.999827	NS	vesicle (multivesicular body) trafficking 1
ENSMUSG00000019872	Smpdl3a	0.285877	5.03812	0.685266	0.407779	0.999827	NS	sphingomyelin phosphodiesterase, acid-like 3A
ENSMUSG00000019873	Reep3	-0.237114	5.15908	0.526266	0.468181	0.999827	NS	Receptor expression-enhancing protein 3
ENSMUSG00000019876	Pkib	0.0617375	5.02302	0.0333024	0.855199	0.999827	NS	cAMP-dependent protein kinase inhibitor beta
ENSMUSG00000019877	Serinc1	-0.124208	8.87426	0.0621115	0.803189	0.999827	NS	Serine incorporator 1
ENSMUSG00000019878	Hsf2	0.518574	2.61582	0.476766	0.489891	0.999827	NS	Heat shock factor protein 2
ENSMUSG00000019883	Echdc1	0.0604055	5.60862	0.053419	0.817217	0.999827	NS	Ethylmalonyl-CoA decarboxylase
ENSMUSG00000019889	Ptprk	0.40305	4.59813	0.92508	0.336145	0.999827	NS	protein tyrosine phosphatase, receptor type, K
ENSMUSG00000019891	Dcbld1	0.493483	4.2076	1.22588	0.26821	0.999827	NS	Mus musculus discoidin, CUB and LCCL domain containing 1 (Dcbld1), transcript variant 2, mRNA.
ENSMUSG00000019894	Slc6a15	-1.74646	0.44569	0.906548	0.341032	0.999827	NS	Sodium-dependent neutral amino acid transporter B(0)AT2
ENSMUSG00000019897	Ccdc59	0.207344	5.08332	0.412867	0.520518	0.999827	NS	Thyroid transcription factor 1-associated protein 26
ENSMUSG00000019899	Lama2	0.0486787	2.29303	0.00108517	0.973721	0.999827	NS	Laminin subunit alpha-2
ENSMUSG00000019900	Rfx6	0.224141	7.47684	0.520733	0.470529	0.999827	NS	DNA-binding protein RFX6
ENSMUSG00000019905	Gprc6a	-0.633295	2.0152	0.45626	0.499377	0.999827	NS	G protein-coupled receptor, family C, group 6, member A
ENSMUSG00000019907	Ppp1r12a	0.241509	4.93175	0.49636	0.481104	0.999827	NS	protein phosphatase 1, regulatory (inhibitor) subunit 12A
ENSMUSG00000019913	Sim1	-0.263945	2.9373	0.158801	0.690263	0.999827	NS	Single-minded homolog 1
ENSMUSG00000019916	P4ha1	-0.0826886	5.53602	0.0584404	0.808978	0.999827	NS	Prolyl 4-hydroxylase subunit alpha-1
ENSMUSG00000019917	Sept10	0.223193	3.90881	0.181977	0.669679	0.999827	NS	septin 10
ENSMUSG00000019920	Lims1	0.045973	5.44648	0.0259728	0.871967	0.999827	NS	Mus musculus LIM and senescent cell antigen-like domains 1 (Lims1), transcript variant 6, mRNA.
ENSMUSG00000019923	Zwint	0.0353455	7.16435	0.0162162	0.898669	0.999827	NS	ZW10 interactor
ENSMUSG00000019927	Ube2d1	0.16522	4.16029	0.139923	0.708358	0.999827	NS	ubiquitin-conjugating enzyme E2D 1
ENSMUSG00000019929	Dcn	-1.3478	5.42973	1.58522	0.208011	0.999827	NS	Decorin
ENSMUSG00000019933	Mrln	-0.278865	5.24043	0.608617	0.435309	0.999827	NS	Myoregulin
ENSMUSG00000019942	Cdk1	-1.18867	2.64476	2.27377	0.13158	0.999827	NS	Cyclin-dependent kinase 1
ENSMUSG00000019943	Atp2b1	-0.0477217	8.03194	0.0186074	0.891498	0.999827	NS	Plasma membrane calcium-transporting ATPase 1
ENSMUSG00000019944	Rhobtb1	0.0816077	5.61119	0.0914159	0.762385	0.999827	NS	Rho-related BTB domain-containing protein 1
ENSMUSG00000019945	Cabcoco1	0.143982	1.49603	0.0160237	0.899269	0.999827	NS	Ciliary-associated calcium-binding coiled-coil protein 1
ENSMUSG00000019947	Arid5b	0.357482	3.72483	0.480272	0.488299	0.999827	NS	AT-rich interactive domain-containing protein 5B
ENSMUSG00000019948	Actr6	0.232201	3.54326	0.172885	0.67756	0.999827	NS	ARP6 actin related protein 6 homolog
ENSMUSG00000019951	Uhrf1bp1l	-0.187424	5.59052	0.496639	0.480981	0.999827	NS	UHRF1 (ICBP90) binding protein 1-like
ENSMUSG00000019952	Poc1b	0.0126316	5.10183	0.00131028	0.971125	0.999827	NS	POC1 centriolar protein B
ENSMUSG00000019961	Tmpo	-0.0259101	7.82787	0.00599854	0.938265	0.999827	NS	thymopoietin
ENSMUSG00000019969	Psen1	-0.0340253	6.50869	0.0176653	0.894264	0.999827	NS	presenilin 1
ENSMUSG00000019970	Sgk1	0.346515	4.45759	0.599923	0.438607	0.999827	NS	Serine/threonine-protein kinase Sgk1
[truncated: 11,810 more rows]
