# Supplementary material for: Reduced synchroneity of intra-islet Ca2+ oscillations in vivo in Robo-deficient β cells
Source: eLife. 2021 Jul 7;10:e61308. doi: 10.7554/eLife.61308 (PMC8289414; doi:10.7554/eLife.61308)
Supplement: Supplementary file 1. [file elife-61308-supp1.csv]

Symbol	sRobo-sCNTRL_logFC	sRobo-sCNTRL_logCPM	sRobo-sCNTRL_LR	sRobo-sCNTRL_PValue	sRobo-sCNTRL_FDR	sRobo-sCNTRL_Status	Description
Hist1h2al	8.607319728	3.75146079	107.9331717	2.78E-25	3.84E-21	UP	histone cluster 1	H2al
Tpm3-rs7	3.758156393	4.1799875	53.79041205	2.23E-13	1.54E-09	UP
Serpinf1	-11.55866926	2.04835162	42.25634077	8.01E-11	3.69E-07	DOWN	Pigment epithelium-derived factor
Rps3a2	2.595852118	4.47479749	37.64090856	8.50E-10	2.94E-06	UP	ribosomal protein S3A2
Gm42743	11.14308629	1.63944554	33.21113514	8.27E-09	2.28E-05	UP	predicted gene 42743
Robo2	-1.720603484	5.97419761	30.99998396	2.58E-08	5.94E-05	DOWN	roundabout guidance receptor 2
Smoc2	-10.79545951	1.29332671	27.66147504	1.45E-07	0.000285288	DOWN	SPARC related modular calcium binding 2
Tnfaip3	2.157693345	7.16044956	26.74944719	2.32E-07	0.000381301	UP	tumor necrosis factor	alpha-induced protein 3
Kif20b	-10.69902039	1.19882023	26.61481382	2.48E-07	0.000381301	DOWN	Kinesin-like protein KIF20B
Robo1	-1.806540301	5.61124197	26.06553058	3.30E-07	0.000414599	DOWN	roundabout guidance receptor 1
Try4	4.019018994	7.41727017	26.21030482	3.06E-07	0.000414599	UP	trypsin 4
Kif18b	-10.60721891	1.10844051	25.30098958	4.90E-07	0.000564802	DOWN	Kinesin-like protein KIF18B
Capza1	3.110976305	3.43920644	24.69280313	6.72E-07	0.000714706	UP	predicted gene 3608
Gja1	-10.54488676	1.0470725	24.21837254	8.60E-07	0.000848959	DOWN	gap junction protein	alpha 1
Espl1	-10.52479509	1.02778163	24.03610674	9.45E-07	0.000871021	DOWN	Mus musculus extra spindle pole bodies 1	separase (Espl1)	transcript variant 2	mRNA.
Sulf1	-10.2493572	0.75673228	19.68826051	9.12E-06	0.006670555	DOWN	Extracellular sulfatase Sulf-1
Fam107b	1.242989212	5.90967215	19.9588483	7.91E-06	0.006670555	UP	Protein FAM107B
Col4a6	-10.31704813	0.82736029	19.67666096	9.17E-06	0.006670555	DOWN	collagen	type IV	alpha 6
Hspa1a	-1.842149832	5.25789854	19.71560171	8.99E-06	0.006670555	DOWN	Heat shock 70 kDa protein 1A
Atf3	1.484194452	5.62040942	19.27308747	1.13E-05	0.007827914	UP	Cyclic AMP-dependent transcription factor ATF-3
Cep55	-10.09026042	0.60213246	18.28367547	1.90E-05	0.012524701	DOWN	Centrosomal protein of 55 kDa
Pcdh18	-10.1457357	0.66045386	17.98098739	2.23E-05	0.014015128	DOWN	Protocadherin 18
BC067074	-10.03507013	0.55147761	17.52861049	2.83E-05	0.01700438	DOWN	cDNA sequence BC067074
Hist2h2aa2	-1.391662513	5.1083737	17.41225794	3.01E-05	0.017324382	DOWN	Histone H2A type 2-A
Plk2	1.329151353	6.83638288	17.21128967	3.34E-05	0.01774044	UP	Serine/threonine-protein kinase PLK2
Tiparp	1.246276397	5.95461052	17.19014098	3.38E-05	0.01774044	UP	TCDD-inducible poly(ADP-ribose) polymerase
Tph1	-10.06860203	0.57872368	17.14336354	3.47E-05	0.01774044	DOWN	tryptophan hydroxylase 1
Fgf13	-9.989346886	0.50338437	17.05077574	3.64E-05	0.017961494	DOWN	Mus musculus fibroblast growth factor 13 (Fgf13)	transcript variant 4	mRNA.
Tbx3	-6.414172092	1.48057315	16.89999603	3.94E-05	0.018775573	DOWN	T-box 3
Gen1	-9.901833707	0.41972858	16.7690023	4.22E-05	0.019446716	DOWN	Flap endonuclease GEN homolog 1
Abca8a	-9.9773951	0.49616254	16.70401191	4.37E-05	0.019475211	DOWN	ATP-binding cassette	sub-family A (ABC1)	member 8a
Arhgap31	-9.894356099	0.41112718	16.5781821	4.67E-05	0.020160633	DOWN	Rho GTPase activating protein 31
Epha1	-9.863337916	0.38386327	16.40868875	5.11E-05	0.02058046	DOWN	Ephrin type-A receptor 1
Itgam	9.903880614	0.42934171	16.36921331	5.21E-05	0.02058046	UP	integrin alpha M
Ctrc	4.12497268	6.81048482	16.44416863	5.01E-05	0.02058046	UP	chymotrypsin-C
Kcnj8	-9.89822853	0.41958044	16.25518693	5.54E-05	0.021050403	DOWN	potassium inwardly-rectifying channel	subfamily J	member 8
Pknox2	-9.888542408	0.41005882	16.22113201	5.64E-05	0.021050403	DOWN	Homeobox protein PKNOX2
Gm4779	9.868077016	0.39229047	16.01186072	6.29E-05	0.022891137	UP
Vcam1	-9.900926869	0.4230954	15.88136892	6.74E-05	0.02389601	DOWN	vascular cell adhesion molecule 1
Cdkn1a	1.410056028	5.15853186	15.83126492	6.92E-05	0.023923718	UP	Cyclin-dependent kinase inhibitor 1
Shc4	-9.783152882	0.30392523	15.71256337	7.37E-05	0.024259848	DOWN	SHC (Src homology 2 domain containing) family	member 4
Fat4	-9.83988932	0.36330439	15.71645367	7.36E-05	0.024259848	DOWN	Protocadherin Fat 4
Dmbt1	5.173288439	8.23928178	15.49753919	8.26E-05	0.026549427	UP	Mus musculus deleted in malignant brain tumors 1 (Dmbt1)	transcript variant 1	mRNA.
Edil3	-9.724528835	0.24555672	15.09507889	0.000102229	0.032107015	DOWN	EGF-like repeat and discoidin I-like domain-containing protein 3
Slc26a11	-9.701597519	0.22843765	14.95748494	0.000109961	0.033767796	DOWN	Sodium-independent sulfate anion transporter
Nupr1	3.880887853	4.11261067	14.89589307	0.00011361	0.034129942	UP	Nuclear protein 1
Pik3cg	-9.651082524	0.17783425	14.74760707	0.000122903	0.036012965	DOWN	Phosphatidylinositol 4	5-bisphosphate 3-kinase catalytic subunit gamma isoform
Hspa1b	-1.246187429	5.2086906	14.71435558	0.00012509	0.036012965	DOWN	Heat shock 70 kDa protein 1B
Gfra2	-9.656381375	0.18550335	14.50596841	0.000139716	0.039402815	DOWN	GDNF family receptor alpha-2
Rgs11	-1.385532798	4.88792805	14.46057555	0.000143124	0.039556603	DOWN	regulator of G-protein signaling 11
Adam12	-6.344566773	1.50530249	14.28918703	0.000156763	0.041659714	DOWN	Disintegrin and metalloproteinase domain-containing protein 12
Sycn	4.048346153	6.38662173	14.29273563	0.000156468	0.041659714	UP	Syncollin
Fosl2	1.910993349	3.82452064	13.85665774	0.000197296	0.051442269	NS	Fos-related antigen 2
Ncam2	-9.519223621	0.04737077	13.53253549	0.000234463	0.056842898	NS	Neural cell adhesion molecule 2
Lims2	-9.522052945	0.0562863	13.53963083	0.000233578	0.056842898	NS	LIM and senescent cell antigen-like-containing domain protein 2
Fbln7	-7.701910198	0.48765099	13.54503406	0.000232907	0.056842898	NS	Fibulin-7
Tnfrsf1b	-9.549309018	0.08329768	13.602051	0.000225939	0.056842898	NS	tumor necrosis factor receptor superfamily	member 1b
Slc26a7	9.507197407	0.04671316	13.46429443	0.000243147	0.05793177	NS	Anion exchange transporter
Wwtr1	-5.848947637	1.32015816	13.42949896	0.000247698	0.058015971	NS	WW domain containing transcription regulator 1
Dusp4	1.494805802	4.52579774	13.24729218	0.000272974	0.06287044	NS	Dual specificity protein phosphatase 4
Zg16	2.990141802	6.36154796	13.16817276	0.000284744	0.063465821	NS	zymogen granule protein 16
Cebpb	1.024635979	5.96704217	13.18742418	0.000281834	0.063465821	NS	CCAAT/enhancer-binding protein beta
Trib1	1.159665947	6.48171161	13.054459	0.000302563	0.066367001	NS	Tribbles homolog 1
Capn6	-9.415383913	-0.04789308	12.985239	0.000313956	0.067790025	NS	Calpain-6
Pnliprp2	3.873422705	7.75815038	12.81033426	0.00034471	0.073285342	NS	pancreatic lipase-related protein 2
Il4ra	-2.509235493	2.9669471	12.73806726	0.000358288	0.075017855	NS	Interleukin-4 receptor subunit alpha Soluble interleukin-4 receptor subunit alpha
Sstr5	-9.347981396	-0.11631365	12.64726823	0.000376115	0.077575093	NS	Somatostatin receptor type 5
Cldn4	0.909780296	6.03481204	12.51907204	0.000402819	0.081861095	NS	Claudin-4
Gm10925	-1.20740172	7.68601275	12.41521129	0.000425851	0.085287429	NS	predicted gene 10925
Bdkrb2	-9.27062192	-0.18952184	12.26966606	0.000460381	0.090885716	NS	B2 bradykinin receptor
Rai14	-9.247559438	-0.20796266	12.16332852	0.000487383	0.093375975	NS	Mus musculus retinoic acid induced 14 (Rai14)	transcript variant 3	mRNA.
Cd55	-9.252557852	-0.20691989	12.15471165	0.00048964	0.093375975	NS	Complement decay-accelerating factor	GPI-anchored
Tmprss5	-9.261022342	-0.19383139	12.14095072	0.000493266	0.093375975	NS	transmembrane protease	serine 5 (spinesin)
Fam109b	-7.494273978	0.28666658	12.05658351	0.000516098	0.096377796	NS	Mus musculus family with sequence similarity 109	member B (Fam109b)	transcript variant 1	mRNA.
Ipo13	-1.302439503	4.58907769	12.00684835	0.000530054	0.096379191	NS	Importin-13
C2cd4a	1.502170957	4.71079245	12.00943163	0.00052932	0.096379191	NS	C2 calcium-dependent domain containing 4A
Ccnb1	-2.409804319	3.01499651	11.94602143	0.000547642	0.098283957	NS	G2/mitotic-specific cyclin-B1
Mt2	1.426674013	5.91776394	11.87856333	0.000567837	0.100601834	NS	Metallothionein-2
5830473C10Rik	-9.17451465	-0.27987093	11.84497927	0.00057817	0.101135872	NS	RIKEN cDNA 5830473C10 gene
Prkg2	2.152157264	3.5170607	11.720486	0.000618158	0.106779083	NS	protein kinase	cGMP-dependent	type II
Slc2a4	-9.15805935	-0.29221093	11.67787144	0.000632479	0.107903957	NS	solute carrier family 2 (facilitated glucose transporter)	member 4
Tns4	9.174136842	-0.27122534	11.64208474	0.000644763	0.108658294	NS	Tensin-4
Plcd1	-9.14667574	-0.302912	11.57430671	0.000668694	0.110008062	NS	1-phosphatidylinositol 4	5-bisphosphate phosphodiesterase delta-1
Rgs1	4.138831506	1.98395651	11.57998389	0.000666655	0.110008062	NS	regulator of G-protein signaling 1
Dusp6	1.171959033	5.0127211	11.47621941	0.000704924	0.114604023	NS	Dual specificity protein phosphatase 6
Dpt	-5.127488097	2.09054395	11.40559537	0.000732232	0.117659515	NS	Dermatopontin
Pdia2	3.748706094	6.54324508	11.34084706	0.000758207	0.120432955	NS	Protein disulfide-isomerase A2
Slc25a31	-9.083862303	-0.36758797	11.26809704	0.000788505	0.123822194	NS	solute carrier family 25 (mitochondrial carrier
Ggt1	5.237180746	2.1270481	11.20121712	0.000817437	0.126923164	NS	Glutathione hydrolase 1 proenzyme Glutathione hydrolase 1 heavy chain Glutathione hydrolase 1 light
Pcna-ps2	-3.600015287	1.87888601	11.15551461	0.000837822	0.128642984	NS
Mgea5	-0.900245022	6.97596806	11.1180753	0.000854905	0.129823363	NS	Protein O-GlcNAcase
Cd24a	1.020276124	5.30612498	11.08501614	0.000870281	0.13072183	NS	Signal transducer CD24
Oxtr	1.71708355	4.14646171	11.03243395	0.000895315	0.133036136	NS	Oxytocin receptor
Spag6	-9.017623472	-0.43065169	10.88847367	0.000967645	0.137854547	NS	Sperm-associated antigen 6
Reg3d	3.46362605	2.87605121	10.94063047	0.000940782	0.137854547	NS	regenerating islet-derived 3 delta
Lrrc55	-9.029523165	-0.41391548	10.9030523	0.000960059	0.137854547	NS	Leucine-rich repeat-containing protein 55
Gm5464	-9.017623325	-0.43065169	10.89395801	0.000964784	0.137854547	NS
Erp27	3.422618902	4.45137756	10.83770167	0.000994541	0.139187836	NS	Endoplasmic reticulum resident protein 27
Csrnp1	1.423021702	5.76401807	10.80094678	0.001014482	0.139187836	NS	Mus musculus cysteine-serine-rich nuclear protein 1 (Csrnp1)	transcript variant 3	mRNA.
Siah2	0.878799584	6.6459119	10.79582445	0.001017293	0.139187836	NS	siah E3 ubiquitin protein ligase 2
Idi1	0.976597898	6.0288622	10.80193395	0.001013941	0.139187836	NS	isopentenyl-diphosphate delta isomerase 1
Sik1	1.725621772	4.96776887	10.74012523	0.001048372	0.142033904	NS	Serine/threonine-protein kinase SIK1
Mrvi1	-8.98299548	-0.46004078	10.71617014	0.001062033	0.142487671	NS	Protein MRVI1
Tagap	4.406989166	1.70499441	10.67760825	0.001084402	0.144089887	NS	T-cell activation Rho GTPase-activating protein
Hyou1	1.179688321	8.04660295	10.65848069	0.001095674	0.144201077	NS	Hypoxia up-regulated protein 1
Cyp2j9	-8.959041448	-0.48261833	10.58583599	0.001139574	0.148563838	NS	cytochrome P450	family 2	subfamily j	polypeptide 9
Cybb	2.667009844	2.51769266	10.47272117	0.001211501	0.156464836	NS	Cytochrome b-245 heavy chain
F630028O10Rik	8.946828351	-0.48595654	10.35561701	0.001290813	0.165164322	NS
Dbpht2	0.937777993	7.27673789	10.29156297	0.001336398	0.169428349	NS
Kcnj5	4.677400547	2.09433417	10.25777324	0.001361099	0.169643181	NS	G protein-activated inward rectifier potassium channel 4
Ska1	-8.886784144	-0.55211047	10.25567842	0.001362645	0.169643181	NS	spindle and kinetochore associated complex subunit 1
Pigt	1.292665506	4.71641943	10.1931954	0.001409598	0.172382656	NS	GPI transamidase component PIG-T
Kctd12b	-0.839214044	6.47358457	10.2089728	0.00139759	0.172382656	NS
Dusp8	1.234172863	4.6691501	10.17374098	0.001424549	0.172682878	NS	Dual specificity protein phosphatase 8
Nsun4	1.448760775	4.08006594	10.13114631	0.001457847	0.173672327	NS	5-methylcytosine rRNA methyltransferase NSUN4
Uty	-1.034066176	5.13745602	10.13780995	0.001452586	0.173672327	NS	ubiquitously transcribed tetratricopeptide repeat gene	Y chromosome
Tlr2	0.901942879	5.83631872	10.10985666	0.001474784	0.174188417	NS	toll-like receptor 2
Pcdhb9	-8.84513959	-0.59094077	10.04252907	0.00152967	0.179139967	NS	protocadherin beta 9
Emilin2	-8.846933922	-0.58669044	10.02648824	0.001543049	0.179188242	NS	Mus musculus elastin microfibril interfacer 2 (Emilin2)	transcript variant 3	mRNA.
Spag6	8.833879244	-0.58990714	9.870202703	0.00167977	0.193439515	NS
Gm4737	2.698028731	2.64773807	9.830886762	0.001716056	0.195984938	NS	predicted gene 4737
Dhrs13os	-8.791891383	-0.64087658	9.809031406	0.001736569	0.196702073	NS
Cuzd1	3.447902009	5.70902504	9.73197808	0.001810895	0.202979489	NS	CUB and zona pellucida like domains 1
Irgq	-1.017087149	5.23819271	9.721381077	0.001821366	0.202979489	NS	Immunity-related GTPase family Q protein
Fbln5	-2.481764205	3.29504522	9.552217394	0.00199708	0.220781212	NS	Fibulin-5
Tppp3	0.941935794	5.32075841	9.455817668	0.002104804	0.223740712	NS	Tubulin polymerization-promoting protein family member 3
Depdc1b	-8.716912818	-0.71035434	9.462870214	0.002096727	0.223740712	NS	DEP domain-containing protein 1B
Itgal	4.839249729	1.55942533	9.470837643	0.00208764	0.223740712	NS	Integrin alpha-L
Ctrl	2.950006421	8.80305478	9.504276617	0.002049936	0.223740712	NS	chymotrypsin-like
Rtn4rl1	-0.831148054	5.65879846	9.49774521	0.002057246	0.223740712	NS	Reticulon-4 receptor-like 1
Nfil3	1.114978307	5.51861099	9.343261732	0.002238068	0.236090583	NS	Nuclear factor interleukin-3-regulated protein
Pdk4	0.872731441	5.74568609	9.320488999	0.002266055	0.237231935	NS	pyruvate dehydrogenase kinase	isoenzyme 4
Spink1	2.928599658	4.59543996	9.27236051	0.002326377	0.238134834	NS	serine peptidase inhibitor	Kazal type 1
Brinp1	-8.674553488	-0.74994892	9.285650748	0.002309559	0.238134834	NS	BMP/retinoic acid-inducible neural-specific protein 1
N4bp1	0.801264066	5.70856833	9.290632107	0.002303287	0.238134834	NS	NEDD4-binding protein 1
Fam46a	0.95005593	6.97368725	9.229558699	0.00238139	0.238466909	NS	family with sequence similarity 46 member A
Nfkbid	1.664271121	3.94871553	9.256158254	0.002347048	0.238466909	NS	NF-kappa-B inhibitor delta
Zfp953	-7.027110715	-0.16194547	9.230904273	0.002379641	0.238466909	NS	zinc finger protein 953
Vav3	-8.628559123	-0.792569	9.09847407	0.002558228	0.252515409	NS	vav 3 oncogene
Fcgbp	-5.274489732	3.54416874	9.107348137	0.002545847	0.252515409	NS
Ninl	-6.950154505	-0.23839548	8.964651406	0.002752532	0.26976767	NS	Ninein-like protein
Rnase1	3.294848012	9.08612444	8.879427358	0.00288402	0.28066388	NS	ribonuclease	RNase A family	1 (pancreatic)
Zscan18	2.4524092	2.56933337	8.84366166	0.002941085	0.284215745	NS	zinc finger and SCAN domain containing 18
Tmed6	1.595483683	4.4788585	8.809928426	0.002995958	0.287507929	NS	Transmembrane emp24 domain-containing protein 6
Cela3b	3.36782535	8.9757978	8.530917036	0.003491637	0.329321407	NS	Chymotrypsin-like elastase family member 3B
Tob2	0.924330812	6.53202076	8.524917813	0.003503166	0.329321407	NS	transducer of ERBB2	2
1700047I17Rik2	1.268784551	4.59782109	8.532911585	0.003487813	0.329321407	NS	RIKEN cDNA 1700047I17 gene 2
Mt1	1.218862732	7.75621424	8.474300693	0.003601988	0.336323486	NS	Metallothionein-1
Sdc4	1.00344437	5.23606984	8.316846134	0.003927906	0.351547633	NS	syndecan 4
Kat14	-0.757734752	5.9784871	8.321395773	0.00391808	0.351547633	NS	lysine acetyltransferase 14
Dusp18	0.853943466	6.20471503	8.358444399	0.003838991	0.351547633	NS	Dual specificity protein phosphatase 18
Phf13	0.859529923	6.11380504	8.330937564	0.003897554	0.351547633	NS	PHD finger protein 13
Tnfrsf19	-4.702784759	1.19992786	8.309827625	0.003943113	0.351547633	NS	Tumor necrosis factor receptor superfamily member 19
Klk1	2.851819793	6.550073	8.314784547	0.003932367	0.351547633	NS	Kallikrein-1
Try10	2.780684827	6.52697762	8.376050227	0.003801978	0.351547633	NS	trypsin 10
Nr4a2	1.28400083	4.6405514	8.249638466	0.004076012	0.360306697	NS	Nuclear receptor subfamily 4 group A member 2
Prrt3	-2.192618269	2.73246327	8.241864794	0.004093505	0.360306697	NS	proline-rich transmembrane protein 3
Amy2b	3.06563472	4.77458847	8.212218286	0.004160925	0.363922948	NS	amylase 2b
Ifrd1	0.952241025	6.31282235	8.149018367	0.004308448	0.373458009	NS	Interferon-related developmental regulator 1
Fosb	1.333217868	7.20564635	8.142486651	0.004323995	0.373458009	NS	Protein fosB
1700086L19Rik	0.903718848	7.61776015	8.120935044	0.004375698	0.375576254	NS
Thbs2	-4.01730004	3.8728835	8.108478741	0.004405869	0.375831471	NS	Thrombospondin-2
Cela1	3.058049735	9.06719246	8.07812877	0.004480268	0.376256585	NS	Chymotrypsin-like elastase family member 1
Errfi1	0.943959845	6.5669939	8.073174346	0.004492535	0.376256585	NS	Mus musculus ERBB receptor feedback inhibitor 1 (Errfi1)	transcript variant 1	mRNA.
Mapk10	-1.06857829	4.94707705	8.081322398	0.00447238	0.376256585	NS	mitogen-activated protein kinase 10 isoform 1x
Arg1	0.843526961	5.40705286	8.042566611	0.004569075	0.378084144	NS	Arginase-1
Cpa1	3.342723468	9.56264736	8.050658959	0.004548711	0.378084144	NS	Carboxypeptidase A1
Dusp5	1.11870114	7.77247563	8.009786397	0.004652523	0.382697671	NS	dual specificity phosphatase 5
Amy2	3.530370053	11.4984202	7.928081181	0.004867339	0.39799854	NS	Pancreatic alpha-amylase
Klf5	0.861073262	6.05708935	7.887582061	0.004977536	0.404615154	NS	Krueppel-like factor 5
Hmgcs2	2.086650147	4.13739495	7.864398991	0.005041758	0.407438925	NS	Hydroxymethylglutaryl-CoA synthase	mitochondrial
Racgap1	-1.010864791	4.78342909	7.816086121	0.005178322	0.413637158	NS	Rac GTPase-activating protein 1
Abcb1a	5.150093958	0.70386132	7.82398692	0.005155734	0.413637158	NS	Multidrug resistance protein 1A
Serpini2	3.041605955	5.38246086	7.786083025	0.005265022	0.418145621	NS	serine (or cysteine) peptidase inhibitor	clade I	member 2
Hdhd5	-1.067016669	5.08533884	7.736849935	0.00541051	0.427244818	NS	Haloacid dehalogenase-like hydrolase domain-containing 5
2210010C04Rik	2.902264097	8.66234095	7.591859153	0.005863245	0.460364699	NS	RIKEN cDNA 2210010C04 gene
Slit2	-2.934927055	2.2791579	7.580270784	0.005901058	0.460715896	NS	slit guidance ligand 2
Als2cl	-4.431961949	0.71341327	7.569613745	0.00593605	0.460844272	NS	ALS2 C-terminal like
Irs2	0.973670826	7.04711241	7.525515633	0.006083114	0.469623202	NS	Insulin receptor substrate 2
Prdx4	0.89131369	5.14657889	7.495699224	0.006184651	0.47218617	NS	peroxiredoxin 4
Pamr1	0.712433392	6.18821194	7.496783831	0.006180928	0.47218617	NS	Inactive serine protease PAMR1
Arl5b	1.270778551	4.052533	7.422580667	0.006441037	0.483933214	NS	ADP ribosylation factor like GTPase 5B
Ncapg2	-1.564178978	3.47786343	7.424267442	0.006435002	0.483933214	NS	non-SMC condensin II complex	subunit G2
Rpl26	0.915650417	5.24182957	7.42187282	0.006443571	0.483933214	NS	60S ribosomal protein L26
Nfkbia	1.56322014	8.72483373	7.401988937	0.00651518	0.486666358	NS	NF-kappa-B inhibitor alpha
Cpa2	3.058353634	9.22439546	7.367418237	0.006641622	0.493443958	NS	Carboxypeptidase A2
Fam19a1	-1.419794435	3.76727901	7.342189191	0.006735476	0.497740897	NS	Protein FAM19A1
Gadd45b	1.341309439	6.09845644	7.316267709	0.006833318	0.502285209	NS	Growth arrest and DNA damage-inducible protein GADD45 beta
N4bp2	1.185022758	4.35234841	7.258038683	0.007058434	0.516087268	NS	NEDD4 binding protein 2
Pcdhga11	-1.458061297	3.68003809	7.239712569	0.007130839	0.518637213	NS	protocadherin gamma subfamily A	11
Phgdh	2.389423806	3.76659017	7.220260811	0.007208523	0.521542323	NS	D-3-phosphoglycerate dehydrogenase
Rem2	0.93785899	5.8053387	7.201145987	0.007285704	0.524380966	NS	RRAD and GEM like GTPase 2
Kcnip1	-0.838977204	5.76486785	7.183788609	0.00735652	0.52673448	NS	Kv channel-interacting protein 1
Skap2	-1.012507574	4.70372116	7.153242033	0.00748286	0.533018788	NS	Src kinase-associated phosphoprotein 2
Slc2a3	-4.9039067	0.6802774	7.116500352	0.007637766	0.541262989	NS	solute carrier family 2 (facilitated glucose transporter)	member 3
Zbtb21	0.747710275	5.50264651	7.061959011	0.007873785	0.555142016	NS	zinc finger and BTB domain containing 21
Trappc11	-0.712373763	6.70979268	7.015478181	0.008080805	0.564018214	NS	Trafficking protein particle complex subunit 11
Ldlrad3	1.353899441	3.76909427	7.015366526	0.008081309	0.564018214	NS	low density lipoprotein receptor class A domain containing 3
Kif5a	-2.811564963	2.17984942	7.005166524	0.008127481	0.564390274	NS	Kinesin heavy chain isoform 5A
Alas1	-0.852358633	5.7498762	6.963434658	0.008319218	0.574816375	NS	5-aminolevulinate synthase	nonspecific	mitochondrial
Tnf	3.041997743	1.88852316	6.943512769	0.008412375	0.575555983	NS	tumor necrosis factor
Gm4117	-6.528650494	-0.63331738	6.943332744	0.008413222	0.575555983	NS	predicted gene 4117
Prss3	2.922821499	6.24054193	6.923981506	0.008504741	0.578950846	NS
Zfp748	-1.220098494	4.18918594	6.898593721	0.008626358	0.584351174	NS	zinc finger protein 748
Rasgrf2	1.813028985	2.95004437	6.850787178	0.008860223	0.586743357	NS	ras-specific guanine nucleotide-releasing factor 2
Ddit3	0.999767701	4.78004142	6.865778422	0.008786197	0.586743357	NS	DNA damage-inducible transcript 3 protein
Dyrk2	0.678975626	5.99645729	6.848017708	0.008873968	0.586743357	NS	Dual specificity tyrosine-phosphorylation-regulated kinase 2
Rimkla	-1.898360868	2.77993136	6.853391557	0.008847317	0.586743357	NS	N-acetylaspartylglutamate synthase A
Gm10334	2.900750118	4.56158891	6.879650494	0.008718261	0.586743357	NS
Fchsd2	0.944183073	4.73370054	6.832988217	0.008948943	0.58888304	NS	F-BAR and double SH3 domains protein 2
Slc52a3	4.698122274	0.77060275	6.782182212	0.009207226	0.603007836	NS	Solute carrier family 52	riboflavin transporter	member 3
Crybg1	0.856721794	5.34103717	6.76980559	0.009271293	0.604339637	NS	crystallin beta-gamma domain containing 1
Usp40	-1.228020593	4.13397754	6.727359777	0.009494503	0.610711069	NS	ubiquitin specific peptidase 40
Gid4	-0.913780932	5.31157953	6.726023436	0.009501619	0.610711069	NS	Glucose-induced degradation
Reg1	2.964080207	10.11968029	6.732073063	0.009469448	0.610711069	NS	regenerating islet-derived 1
Nr4a1	1.95734973	9.83760043	6.657296297	0.009875063	0.628864046	NS	nuclear receptor subfamily 4	group A	member 1
Sdc3	-0.692898449	5.85801006	6.662274518	0.009847515	0.628864046	NS	syndecan 3
Cfap52	5.049448231	0.02793473	6.632819104	0.010011669	0.634638796	NS	Cilia- and flagella-associated protein 52
Lama4	-2.319866207	2.26352433	6.600762319	0.010193512	0.638212318	NS	Laminin subunit alpha-4
Tgfa	-1.228645466	4.60081873	6.598478679	0.010206594	0.638212318	NS	transforming growth factor alpha
4430402I18Rik	-3.911508673	0.73122526	6.599716692	0.0101995	0.638212318	NS	RIKEN cDNA 4430402I18 gene
Klf10	1.04566836	7.80264834	6.577303446	0.010328725	0.64293986	NS	Mus musculus Kruppel-like factor 10 (Klf10)	transcript variant 3	mRNA.
Pgf	0.951283	4.57660797	6.555907282	0.010453652	0.647798307	NS	placental growth factor
Mcm7	-1.013281171	4.69723329	6.53835403	0.010557298	0.651300477	NS	minichromosome maintenance complex component 7
Tff2	2.454789205	4.39446282	6.482038849	0.010896992	0.65188541	NS	trefoil factor 2 (spasmolytic protein 1)
Ccng2	-1.321670036	3.72222334	6.509675361	0.010728909	0.65188541	NS	Cyclin-G2
Igdcc4	-3.892434642	1.25267382	6.486396988	0.010870308	0.65188541	NS	Immunoglobulin superfamily DCC subclass member 4
Sppl2b	-1.116771531	4.21987686	6.507308884	0.010743197	0.65188541	NS	Signal peptide peptidase-like 2B
Gm5771	2.728303717	6.95200151	6.503181092	0.010768166	0.65188541	NS
Xlr3b	1.238165145	3.9054	6.493755806	0.010825403	0.65188541	NS	X-linked lymphocyte-regulated 3B
Mon1b	-0.993346255	4.61725125	6.524755534	0.010638317	0.65188541	NS	Vacuolar fusion B
Usp6nl	-0.959976384	4.76298387	6.444032104	0.011132568	0.663107567	NS	USP6 N-terminal like
Slc40a1	-0.801926181	6.9593998	6.417407067	0.011300704	0.670233619	NS	solute carrier family 40 (iron-regulated transporter)	member 1
Hace1	-0.895936492	4.78694866	6.377698167	0.011556321	0.676681384	NS	E3 ubiquitin-protein ligase HACE1
Gm6733	2.009120691	2.51172919	6.390825097	0.01147117	0.676681384	NS	predicted gene 6733
Plut	-1.110541104	4.2028316	6.383321029	0.011519768	0.676681384	NS	PDX1 associated lncRNA	upregulator of transcription
Tob1	0.914313455	7.60039575	6.355244408	0.011703482	0.682406824	NS	Protein Tob1
Clps	3.062100783	9.89592419	6.326165618	0.011896926	0.69077154	NS	Colipase
Gstm1	0.753684064	5.86546427	6.317581973	0.011954654	0.691219085	NS	Glutathione S-transferase Mu 1
Cd81	0.750719713	7.24399234	6.309168342	0.012011517	0.691613141	NS	CD81 antigen
Zfp954	-1.20161936	3.98011792	6.30164626	0.01206259	0.691671907	NS	zinc finger protein 954
Pik3r3	-0.927612743	4.77725439	6.2544186	0.01238839	0.707418028	NS	Phosphatidylinositol 3-kinase regulatory subunit gamma
Gem	0.990379254	7.86745375	6.224861591	0.012596876	0.716363056	NS	GTP-binding protein GEM
Nr1d2	-0.759343871	7.08469281	6.201897992	0.01276134	0.720745811	NS	nuclear receptor subfamily 1	group D	member 2
Pcdhb6	3.350320988	1.79780508	6.199553242	0.012778256	0.720745811	NS	Protocadherin beta-6
Scara3	-2.326842233	2.28738621	6.163244264	0.013043177	0.730856815	NS	Scavenger receptor class A member 3
Ptges	-3.911455333	1.52965758	6.160518357	0.013063292	0.730856815	NS	Prostaglandin E synthase
2810002D19Rik	-4.839842905	-0.01483646	6.143993962	0.013185916	0.734742627	NS	RIKEN cDNA 2810002D19 gene
Lysmd3	0.814125116	5.38077598	6.134093263	0.013259953	0.735900767	NS	LysM and putative peptidoglycan-binding domain-containing protein 3
D130043K22Rik	-1.711210889	3.73332251	6.090060646	0.013594442	0.745482519	NS	Dyslexia-associated
Bmp7	2.913369365	1.78115139	6.090653139	0.013589884	0.745482519	NS	Bone morphotic protein 7
Gm14434	-4.153793087	0.55440894	6.101550456	0.013506333	0.745482519	NS
Brpf3	0.865705562	4.78700062	6.074497394	0.013714732	0.749106241	NS	bromodomain and PHD finger containing	3
Havcr2	4.772787566	0.35180995	6.044974706	0.013945933	0.758735613	NS	Hepatitis A virus cellular receptor 2 homolog
Gsn	-0.935535271	5.58673918	6.010545033	0.014220634	0.763746486	NS	gelsolin
Col1a2	-2.492080985	7.32339284	6.024432593	0.014109167	0.763746486	NS	Collagen alpha-2(I) chain
Stk26	-1.487130114	3.62509192	6.005777841	0.014259107	0.763746486	NS	serine/threonine kinase 26
Pcdhb11	-4.670692711	0.46148346	6.010768182	0.014218836	0.763746486	NS
Cldnd1	0.639926653	5.72752681	5.958201737	0.014648975	0.76971173	NS	Claudin domain-containing protein 1
Gfra3	1.086011256	4.14371223	5.959247334	0.01464029	0.76971173	NS	GDNF family receptor alpha-3
Arhgef39	-4.603884774	-0.00035846	5.970422	0.014547799	0.76971173	NS	Rho guanine nucleotide exchange factor 39
Prss1	2.622011585	6.37891744	5.963733332	0.014603087	0.76971173	NS
Prob1	-3.543725371	1.51781645	5.971870198	0.014535857	0.76971173	NS	proline rich basic protein 1
Hbp1	-0.658274058	6.95111943	5.940770029	0.014794554	0.774416427	NS	HMG-box transcription factor 1
Rgs2	0.839080141	5.42116204	5.9106385	0.015049716	0.7848001	NS	Regulator of G-protein signaling 2
Zfp418	-5.059185146	0.02985896	5.881177445	0.015303584	0.786171868	NS	zinc finger protein 418
Tmem97	0.927173761	5.51103518	5.885148359	0.015269111	0.786171868	NS	Sigma intracellular receptor 2
Entpd1	2.592883641	2.01381137	5.891460091	0.015214481	0.786171868	NS	Ectonucleoside triphosphate diphosphohydrolase 1
Hmgcs1	0.754912565	7.50423964	5.900060946	0.015140361	0.786171868	NS	Hydroxymethylglutaryl-CoA synthase	cytoplasmic
Gm38394	-2.055391014	2.4986586	5.823628187	0.015812295	0.809296695	NS	predicted gene	38394
Gm12715	0.762450131	5.88802518	5.812468603	0.015912941	0.811442569	NS	predicted gene 12715
Hmmr	-1.636107474	2.95406975	5.803885735	0.015990798	0.812210606	NS	Hyaluronan mediated motility receptor
Cckar	3.606061973	4.6605673	5.785042975	0.016163103	0.812210606	NS	Cholecystokinin receptor type A
Adcy7	-3.792681847	1.66267488	5.786373668	0.016150872	0.812210606	NS	Adenylate cyclase type 7
Ntrk2	-0.923366437	4.9343586	5.791582352	0.016103088	0.812210606	NS	BDNF/NT-3 growth factors receptor
Nfkbiz	1.058215783	7.7101066	5.740050084	0.01658232	0.829057938	NS	NF-kappa-B inhibitor zeta
Myof	-3.856825064	1.21371978	5.736237434	0.016618355	0.829057938	NS	Myoferlin
Gm45223	-4.549036785	0.49524801	5.717305377	0.016798492	0.835030074	NS	predicted gene 45223
Tab1	-0.874818777	5.19661241	5.697581328	0.016988308	0.841438798	NS	TGF-beta-activated kinase 1 and MAP3K7-binding protein 1
Ibtk	-0.615157138	6.85819908	5.632704968	0.017628409	0.870024925	NS	Inhibitor of Bruton tyrosine kinase
Gp2	2.99447216	7.57099355	5.620477429	0.017751812	0.870254729	NS	glycoprotein 2 (zymogen granule membrane)
Slc39a5	3.29670583	1.68965141	5.619766436	0.017759015	0.870254729	NS	Zinc transporter ZIP5
Cdkl5	1.521889083	3.25362537	5.612611555	0.017831668	0.870727286	NS	Cyclin-dependent kinase-like 5
2210408I21Rik	-1.286005013	3.67141175	5.597386639	0.017987289	0.875233629	NS	Uncharacterized
Arc	1.365634381	8.72635938	5.583217759	0.018133376	0.879246043	NS	Activity-regulated cytoskeleton-associated protein
Try5	2.739672698	8.87670337	5.569425322	0.018276758	0.883099729	NS
Etv1	0.688584641	5.55653183	5.553631977	0.01844238	0.885298521	NS	ETS translocation variant 1
Prkx	0.90644209	4.52559682	5.55287167	0.018450393	0.885298521	NS	cAMP-dependent protein kinase catalytic subunit PRKX
Cdon	1.373733805	3.59252868	5.544288599	0.018541092	0.886572133	NS	Cell adhesion molecule-related/down-regulated by oncos
Cpb1	3.07593476	10.67570794	5.462290942	0.019431154	0.889161386	NS	carboxypeptidase B1 (tissue)
Sox8	5.21791209	-0.35765247	5.452511335	0.019540218	0.889161386	NS	SRY (sex determining region Y)-box 8
Lipo3	-1.453551548	4.03063923	5.472102843	0.019322363	0.889161386	NS
Itih5	-1.762547729	2.96806892	5.499099309	0.019026271	0.889161386	NS	Inter-alpha-trypsin inhibitor heavy chain H5
Tuba4a	0.73117805	7.22701411	5.497586598	0.019042738	0.889161386	NS	tubulin	alpha 4A
Vwa5b1	-1.14899747	3.98576172	5.476586273	0.019272862	0.889161386	NS	von Willebrand factor A domain containing 5B1
Atp2b2	-0.854443561	5.8308108	5.444971452	0.019624736	0.889161386	NS	Plasma membrane calcium-transporting ATPase 2
Ddx11	-4.565337358	0.25411356	5.477693384	0.019260658	0.889161386	NS	Mus musculus DEAD/H (Asp-Glu-Ala-Asp/His) box helicase 11 (Ddx11)	transcript variant 2	mRNA.
Zfp280c	1.491052004	3.38219866	5.460281272	0.019453515	0.889161386	NS	zinc finger protein 280C
Zer1	0.626322242	5.85079127	5.479179716	0.019244288	0.889161386	NS	zyg-11 related	cell cycle regulator
Taf7	0.733288504	5.24241723	5.44598685	0.019613332	0.889161386	NS	Transcription initiation factor TFIID subunit 7
Cacna1c	1.059613755	4.08876078	5.502148548	0.018993124	0.889161386	NS	Voltage-dependent L-type calcium channel subunit alpha-1C
Pprc1	-0.857913285	4.72500493	5.449457249	0.019574407	0.889161386	NS	Mus musculus peroxisome proliferative activated receptor	gamma	coactivator-related 1 (Pprc1)	tran
Prss2	3.164172956	10.36700125	5.493022117	0.019092513	0.889161386	NS	protease	serine 2
5830417I10Rik	-0.845331455	4.74544207	5.475567235	0.019284101	0.889161386	NS	RIKEN cDNA 5830417I10 gene
Gm20721	0.617961945	5.71097089	5.449110447	0.019578293	0.889161386	NS
Eif2ak3	-0.61617978	5.94245695	5.436042691	0.019725311	0.89079762	NS	eukaryotic translation initiation factor 2 alpha kinase 3
Man1c1	0.630503896	6.27196981	5.423637241	0.019865934	0.892275874	NS	mannosidase alpha class 1C member 1
5730455P16Rik	-0.730301931	5.2511726	5.42177064	0.019887182	0.892275874	NS	Protein Njmu-R1
Cela2a	2.87750517	10.65639635	5.403556156	0.020095765	0.898716429	NS	Chymotrypsin-like elastase family member 2A
Aldh18a1	-0.607138882	6.47789123	5.395879443	0.020184351	0.899766291	NS	Delta-1-pyrroline-5-carboxylate synthase Glutamate 5-kinase Gamma-glutamyl phosphate reductase
Rbpjl	2.855375277	2.09908563	5.383263197	0.020330816	0.901974809	NS	recombination signal binding protein for immunoglobulin kappa J region-like
Shcbp1	-3.057936068	1.66105535	5.376801239	0.02040626	0.901974809	NS	SHC SH2 domain-binding protein 1
Creb1	-0.758245676	5.07104717	5.369233901	0.020494977	0.901974809	NS	Cyclic AMP-responsive element-binding protein 1
Ctrb1	3.205204665	10.82067842	5.374312856	0.020435389	0.901974809	NS	Chymotrypsinogen B Chymotrypsin B chain A Chymotrypsin B chain B Chymotrypsin B chain C
Taf1	-0.604129439	5.74333412	5.355026037	0.020662626	0.906466113	NS	TATA-box binding protein associated factor 1
Dek	0.653269921	5.55895079	5.341963024	0.020818018	0.910392988	NS	Protein DEK
Tmem43	0.649349032	5.63452689	5.334638804	0.020905672	0.911342202	NS	Transmembrane protein 43
Abca7	-0.594034808	6.05399659	5.311058945	0.021190472	0.920852636	NS	ATP-binding cassette	sub-family A (ABC1)	member 7
Gna13	0.630853395	5.81798627	5.265317333	0.021754456	0.939452598	NS	guanine nucleotide binding protein	alpha 13
Zfp606	-1.129540387	4.34796661	5.268092585	0.021719799	0.939452598	NS	zinc finger protein 606
Kif11	-1.776154294	2.77328154	5.241822444	0.022050163	0.943378351	NS	Kinesin-like protein KIF11
Btd	-1.490618479	3.26035035	5.245262354	0.02200661	0.943378351	NS	biotinidase
Msx1	3.43333427	0.84190476	5.246992964	0.021984732	0.943378351	NS	Homeobox protein MSX-1
Pappa2	0.664535054	6.34922354	5.229202482	0.022210714	0.94731438	NS	pappalysin 2
Gab2	-1.913304323	3.37412402	5.206680696	0.022500252	0.956710709	NS
Ppp1r17	3.104347406	2.57558729	5.152003867	0.023219562	0.963209597	NS	Protein phosphatase 1 regulatory subunit 17
Ier3	1.065791972	5.23106491	5.178173221	0.022872359	0.963209597	NS	immediate early response 3
Atp6v1c2	4.584992627	-0.36888861	5.165152875	0.023044429	0.963209597	NS	ATPase	H+ transporting	lysosomal V1 subunit C2
Olfm4	-1.93864245	2.62678685	5.13193573	0.023489517	0.963209597	NS	Mus musculus olfactomedin 4 (Olfm4)	mRNA.
Map3k8	1.668791671	2.92153336	5.147279719	0.02328282	0.963209597	NS	mitogen-activated protein kinase kinase kinase 8
Cish	0.812005928	5.098451	5.140323416	0.023376293	0.963209597	NS	Cytokine-inducible SH2-containing protein
Chst2	2.231976196	3.16050212	5.148942039	0.023260541	0.963209597	NS	Carbohydrate sulfotransferase 2
Arid5a	1.520835433	3.21356637	5.14002755	0.023380277	0.963209597	NS	AT-rich interactive domain-containing protein 5A
Ubxn10	-0.577011657	6.41394931	5.134432102	0.023455759	0.963209597	NS	UBX domain protein 10
Nav2	-0.59737852	6.18021441	5.154107572	0.023191451	0.963209597	NS	neuron navigator 2
Ccnd1	0.856537715	5.6635071	5.187493183	0.022750009	0.963209597	NS	G1/S-specific cyclin-D1
Slc5a3	1.82555389	2.60123215	5.164742056	0.02304988	0.963209597	NS	Sodium/myo-inositol cotransporter
Irf1	1.1045931	7.75085367	5.104980887	0.023857242	0.973043221	NS	interferon regulatory factor 1
Coro2b	-0.772002144	5.08853537	5.10404229	0.023870154	0.973043221	NS	Coronin-2B
Gmppb	-0.637081214	6.00211489	5.082215127	0.024172468	0.982468648	NS	GDP-mannose pyrophosphorylase B
Tbc1d31	-1.505193459	3.18023529	5.053831537	0.024571545	0.993691094	NS	TBC1 domain family member 31
Serpinb1a	1.340031136	3.38057273	5.052361553	0.024592398	0.993691094	NS	serine (or cysteine) peptidase inhibitor	clade B	member 1a
Shmt2	0.836768994	4.61553145	5.043559183	0.024717655	0.995840464	NS	serine hydroxymethyltransferase 2 (mitochondrial)
Gnai3	-0.223789305	7.8193917	0.443697736	0.505343094	0.999827379	NS	guanine nucleotide binding protein (G protein)	alpha inhibiting 3
Cdc45	-1.088683456	3.01383292	2.523243195	0.112179655	0.999827379	NS	Cell division control
H19	-1.064160196	-0.28456775	0.280668617	0.596263316	0.999827379	NS
Narf	0.257563387	4.18017268	0.247176571	0.619070195	0.999827379	NS	Nuclear prelamin A recognition factor
Cav2	0.306993832	2.19244512	0.099326295	0.752639609	0.999827379	NS	Caveolin-2
Klf6	0.655177254	5.59733545	3.530327173	0.060255897	0.999827379	NS	Kruppel like factor 6
Scmh1	-0.2978439	5.81006557	1.225332495	0.268316681	0.999827379	NS	Polycomb protein SCMH1
Cox5a	0.282390555	5.35061213	0.942336839	0.33167759	0.999827379	NS	Cytochrome c oxidase subunit 5A	mitochondrial
Tbx2	-0.089152355	2.212001	0.003556063	0.952448147	0.999827379	NS	T-box transcription factor TBX2
Wnt9a	-0.550011421	-0.20034266	0.075568581	0.783395064	0.999827379	NS	wingless-type MMTV integration site family	member 9A
Fer	-0.421952535	4.77467376	1.277416378	0.258379969	0.999827379	NS	Tyrosine-protein kinase Fer
Xpo6	-0.151627753	6.8123966	0.343112219	0.558038275	0.999827379	NS	exportin 6
Tfe3	0.421879596	5.79867747	2.240009273	0.134480174	0.999827379	NS	Transcription factor E3
Axin2	-0.535745532	0.69476182	0.150768805	0.697801741	0.999827379	NS	Axin-2
Brat1	-0.203942348	4.57796	0.294411836	0.587407095	0.999827379	NS	BRCA1-associated ATM activator 1
Gna12	-0.093910664	6.66471205	0.13529362	0.713005359	0.999827379	NS	guanine nucleotide binding protein	alpha 12
Slc22a18	1.499406316	0.06238191	0.852525405	0.355838893	0.999827379	NS	solute carrier family 22 (organic cation transporter)	member 18
Igsf5	0.078770121	3.76228043	0.020034364	0.887441151	0.999827379	NS
Pih1d2	0.055198642	2.68302093	0.005697297	0.93983246	0.999827379	NS	PIH1 domain-containing protein 2
Dlat	-0.182024096	6.07523957	0.461717651	0.496822319	0.999827379	NS	Dihydrolipoyllysine-residue acetyltransferase component of pyruvate dehydrogenase complex	mitochond
Sdhd	-0.068050329	7.15698357	0.060973948	0.804963146	0.999827379	NS	succinate dehydrogenase complex	subunit D	integral membrane protein
Ccnd2	0.101593379	9.77170475	0.025312225	0.873591536	0.999827379	NS	G1/S-specific cyclin-D2
Gpr107	-0.507734481	5.6990705	3.770230456	0.052172444	0.999827379	NS	G protein-coupled receptor 107
Nalcn	-0.529999624	4.32906218	1.402361166	0.236328634	0.999827379	NS	sodium leak channel	non-selective
Btbd17	-0.373003752	5.34540218	1.353204818	0.244718627	0.999827379	NS	BTB/POZ domain-containing protein 17
Th	0.2007191	7.66815482	0.345655195	0.556582984	0.999827379	NS	tyrosine hydroxylase
Ins2	-0.151894061	17.01034317	0.006083649	0.937829841	0.999827379	NS	Insulin-2 Insulin-2 B chain Insulin-2 A chain
Scnn1g	-0.153913204	3.77465938	0.093526133	0.759741376	0.999827379	NS	Amiloride-sensitive sodium channel subunit gamma
Gmpr	0.003161501	7.95662967	8.95E-05	0.992452993	0.999827379	NS	guanosine monophosphate reductase
Glra1	0.06735652	-0.45617346	0.0007755	0.977783535	0.999827379	NS	Glycine receptor subunit alpha-1
Mid2	-0.141868891	4.56681311	0.114881306	0.734653839	0.999827379	NS	Mus musculus midline 2 (Mid2)	transcript variant 2	mRNA.
Trim25	-0.10514322	4.95578856	0.092640342	0.760846965	0.999827379	NS	E3 ubiquitin/ISG15 ligase TRIM25
Dgke	0.575976117	5.08041134	2.424325828	0.119464628	0.999827379	NS	Diacylglycerol kinase epsilon
Scpep1	0.097430549	7.2947501	0.104303606	0.746725015	0.999827379	NS	serine carboxypeptidase 1
Mnt	0.135589725	2.70523244	0.031714295	0.858656161	0.999827379	NS	Max-binding protein MNT
Itgb2	-0.37719378	1.19279247	0.050847281	0.821595447	0.999827379	NS
Hddc2	0.398885479	3.17092461	0.349105252	0.554620063	0.999827379	NS	HD domain-containing protein 2
Tpd52l1	0.672769278	2.89647023	0.976125867	0.323157143	0.999827379	NS	tumor protein D52-like 1
Pemt	-0.155757335	1.98651397	0.026642259	0.870341625	0.999827379	NS	Phosphatidylethanolamine N-methyltransferase
Cdh1	-0.230420107	9.65271344	0.137070647	0.711210729	0.999827379	NS	cadherin 1
Cdh4	-0.472254192	3.90897206	0.843714866	0.358336474	0.999827379	NS	Cadherin-4
Ckmt1	0.079605766	4.44730257	0.041498271	0.838579156	0.999827379	NS	creatine kinase	mitochondrial 1	ubiquitous
Bcl6b	0.19918731	4.24230227	0.218428909	0.640239627	0.999827379	NS	B-cell CLL/lymphoma 6 member B protein
Arvcf	-0.310725934	5.02269632	0.578968056	0.446717094	0.999827379	NS	Armadillo repeat protein deleted in velo-cardio-facial syndrome homolog
Comt	-0.074809558	6.72707158	0.083430514	0.772701213	0.999827379	NS	Catechol O-methyltransferase
Rtca	0.137074565	4.64605978	0.137216855	0.711063663	0.999827379	NS	RNA 3'-terminal phosphate cyclase
Dbt	1.018737866	3.75508283	3.719634224	0.05377615	0.999827379	NS	Mus musculus dihydrolipoamide branched chain transacylase E2 (Dbt)	transcript variant 2	mRNA.
Dazap2	-0.09143772	8.10188249	0.065966691	0.797302433	0.999827379	NS	DAZ-associated protein 2
Mcts1	-0.114116331	4.07547717	0.062961501	0.801874953	0.999827379	NS	Malignant T-cell-amplified sequence 1
Rem1	0.359668695	0.52545496	0.037655146	0.846137249	0.999827379	NS	GTP-binding protein REM 1
Trappc10	-0.067558389	4.44842268	0.028383452	0.866210482	0.999827379	NS
Ccm2	-0.514497546	5.45781886	3.443298047	0.063508799	0.999827379	NS	Cerebral cavernous malformations
Tbrg4	0.760450461	3.86752858	1.959651374	0.161550608	0.999827379	NS	Protein TBRG4
Tmprss2	-0.47285469	3.18387758	0.534361229	0.464779057	0.999827379	NS	Transmembrane protease serine 2 Transmembrane protease serine 2 non-catalytic chain Transmembrane pr
Fap	-0.116428368	0.29341097	0.004698356	0.945352154	0.999827379	NS	Prolyl endopeptidase FAP Antiplasmin-cleaving enzyme FAP	soluble form
Gcg	0.293704252	14.22438293	0.039978288	0.841523039	0.999827379	NS	Glucagon Glicentin Glicentin-related polypeptide Oxyntomodulin Glucagon Glucagon-like peptide 1 Gluc
Ndufa9	0.069549839	6.34100452	0.074627257	0.784714931	0.999827379	NS	NADH dehydrogenase [ubiquinone] 1 alpha subcomplex subunit 9	mitochondrial
Lck	-0.68137351	0.8316658	0.15134555	0.697252805	0.999827379	NS	Proto-onco tyrosine-protein kinase LCK
Cttnbp2	-0.722632472	4.50532408	2.571549773	0.108801094	0.999827379	NS	Cortactin-binding protein 2
Galnt1	-0.056574492	7.64195061	0.032986602	0.855879272	0.999827379	NS	Polypeptide N-acetylgalactosaminyltransferase 1 Polypeptide N-acetylgalactosaminyltransferase 1 solu
Mkrn2	0.18087873	5.75886815	0.446074332	0.504205111	0.999827379	NS	Probable E3 ubiquitin-protein ligase makorin-2
Pparg	-0.368613266	2.65723188	0.228365364	0.632738544	0.999827379	NS	peroxisome proliferator activated receptor gamma
Raf1	-0.133859169	6.02957868	0.208820037	0.647693823	0.999827379	NS	Mus musculus v-raf-leukemia viral onco 1 (Raf1)	transcript variant 3	mRNA.
Pdgfb	0.308918309	0.39362469	0.043436657	0.834905236	0.999827379	NS	platelet derived growth factor	B polypeptide
Acvrl1	-0.136182915	0.97299943	0.006467562	0.935902302	0.999827379	NS	Serine/threonine-protein kinase receptor R3
Grasp	1.024864487	2.81029238	1.863468412	0.172225029	0.999827379	NS	ral receptor for phosphoinositides 1-associated scaffold protein
Acvr1b	1.184717884	1.53911787	1.176389628	0.278092223	0.999827379	NS	Activin receptor type-1B
Tom1l2	-0.154315682	7.22345859	0.283210411	0.594604679	0.999827379	NS	TOM1-like protein 2
Gpa33	0.048934686	3.49923636	0.007472157	0.931115348	0.999827379	NS	glycoprotein A33 (transmembrane)
Zfp385a	1.409424656	-0.10793179	0.719300971	0.396373299	0.999827379	NS	zinc finger protein 385A
Itga5	0.356428138	1.43483994	0.100651724	0.751048937	0.999827379	NS	Integrin alpha-5 Integrin alpha-5 heavy chain Integrin alpha-5 light chain
Wdr77	-0.14480903	5.36552069	0.231776475	0.630209716	0.999827379	NS	WD repeat domain 77
Atp5f1	0.114556835	7.28969143	0.144641018	0.703710121	0.999827379	NS	ATP synthase F(0) complex subunit B1	mitochondrial
Sox9	0.233756401	1.98536281	0.052781538	0.818292	0.999827379	NS	Transcription factor SOX-9
Hnrnpd	-0.201469279	6.55483652	0.624094944	0.429529637	0.999827379	NS	Heteroous nuclear ribonucleoprotein D0
Dynlt1c	-0.423836707	3.1154223	0.355353541	0.551098153	0.999827379	NS	dynein light chain Tctex-type 1C
C1d	-0.135004094	5.88307068	0.250889953	0.61644913	0.999827379	NS	Mus musculus C1D nuclear receptor co-repressor (C1d)	transcript variant 2	mRNA.
Gm2a	0.298962373	5.63922258	1.09891451	0.294504447	0.999827379	NS	Ganglioside GM2 activator
Krit1	-0.114252023	5.61153672	0.151289543	0.697306059	0.999827379	NS	Krev interaction trapped protein 1
Clcn4	0.040146923	6.85910083	0.023985256	0.876922432	0.999827379	NS	Mus musculus chloride channel	voltage-sensitive 4 (Clcn4)	transcript variant 7	mRNA.
Sema4f	-2.764265611	0.22116233	2.042838459	0.152924059	0.999827379	NS	Semaphorin-4F
Myo18a	0.24255671	6.58702828	0.783281132	0.376139528	0.999827379	NS	myosin XVIIIA
Sez6	-0.716345518	0.89382125	0.300046449	0.583853303	0.999827379	NS	Seizure protein 6
Abhd15	-0.22213249	6.71759384	0.61334521	0.433531053	0.999827379	NS	abhydrolase domain containing 15
Loxl3	-1.670030537	0.62650112	1.111592169	0.291736108	0.999827379	NS	Lysyl oxidase homolog 3
Kat2b	0.422253493	4.85455241	1.434165971	0.231085751	0.999827379	NS	Histone acetyltransferase KAT2B
Rab5b	-0.081046033	5.49371077	0.087193095	0.767776351	0.999827379	NS	RAB5B	member RAS oncogene family
Icosl	0.636906579	1.5486631	0.330558651	0.565330319	0.999827379	NS	icos ligand
Spg7	-0.193665332	5.91626255	0.493532075	0.482355943	0.999827379	NS	Paraplegin
Rpl13	0.296404663	7.50912048	0.927395972	0.335540495	0.999827379	NS	60S ribosomal protein L13
Chmp1a	0.080323047	7.04659446	0.087026117	0.767992434	0.999827379	NS	Charged multivesicular body protein 1a
Rpa1	-0.143214417	6.88589605	0.272676587	0.60154192	0.999827379	NS	Replication protein A 70 kDa DNA-binding subunit
Tubgcp3	0.115570653	5.32345729	0.151078102	0.697507207	0.999827379	NS	tubulin	gamma complex associated protein 3
Polr3d	0.049578663	4.84522593	0.017549029	0.894610377	0.999827379	NS	DNA-directed RNA polymerase III subunit RPC4
Tcf7	1.753359186	1.72489481	1.777188055	0.182494996	0.999827379	NS	transcription factor 7	T cell specific
Ddx3x	0.203971759	8.00228346	0.353703545	0.552024093	0.999827379	NS	ATP-dependent RNA helicase DDX3X
Kcnn3	-0.154451876	2.96885801	0.052276892	0.819147641	0.999827379	NS	Small conductance calcium-activated potassium channel protein 3
Usp32	-0.093416494	3.46949766	0.019894152	0.887833104	0.999827379	NS	ubiquitin specific peptidase 32
Txnrd3	0.133811985	3.81532415	0.072851204	0.787229784	0.999827379	NS	thioredoxin reductase 3
Zfp512b	-0.075863626	6.07224763	0.082918261	0.773380948	0.999827379	NS	zinc finger protein 512B
Dnajc5	-0.071120596	7.36317313	0.055971845	0.812979769	0.999827379	NS	DnaJ homolog subfamily C member 5
Tpd52l2	-0.256290131	5.80647125	0.908519912	0.340507435	0.999827379	NS	tumor protein D52-like 2
Fmr1	-0.14635769	6.00134976	0.303732983	0.581551585	0.999827379	NS	fragile X mental retardation 1
Bcl11a	-1.862975414	1.67009327	2.352946891	0.125046422	0.999827379	NS	B-cell lymphoma/leukemia 11A
Pxmp4	-0.227122924	4.34975626	0.300530721	0.583549897	0.999827379	NS	Peroxisomal membrane protein 4
Dlg3	0.274865988	5.6057461	1.108289872	0.292453995	0.999827379	NS	Disks large homolog 3
Gnb1l	-0.033161472	2.9807498	0.002546871	0.959750622	0.999827379	NS	guanine nucleotide binding protein (G protein)	beta polypeptide 1-like
Mmp11	-0.75870508	0.10261978	0.17938422	0.671902967	0.999827379	NS	Stromelysin-3
Smarcb1	-0.015464505	5.78130451	0.003200275	0.954886956	0.999827379	NS	SWI/SNF related	matrix associated	actin dependent regulator of chromatin	subfamily b	member 1
Hip1r	0.038071404	6.70472119	0.020556002	0.885995096	0.999827379	NS	Huntingtin-interacting protein 1-related protein
Nsun5	0.374154055	3.25516324	0.340365135	0.559618535	0.999827379	NS	Probable 28S rRNA (cytosine-C(5))-methyltransferase
Top1mt	-0.347366086	0.15539858	0.050666535	0.821907485	0.999827379	NS	Mus musculus DNA topoisomerase 1	mitochondrial (Top1mt)	transcript variant 2	mRNA.
Mmp14	-0.214334002	4.32945844	0.169104264	0.680909106	0.999827379	NS	Matrix metalloproteinase-14
Oxa1l	0.22975022	4.45230655	0.335268915	0.562572908	0.999827379	NS	Mitochondrial inner membrane protein OXA1L
Heatr6	-0.130198193	4.4360699	0.101173412	0.750426012	0.999827379	NS	HEAT repeat-containing protein 6
Ilf2	-0.082812833	6.04744768	0.085437426	0.770059696	0.999827379	NS	Interleukin enhancer-binding factor 2
Chtop	-0.052666025	6.71765909	0.042058593	0.837508124	0.999827379	NS	Chromatin target of PRMT1 protein
Snapin	0.075553229	4.97389051	0.04891777	0.82495725	0.999827379	NS	SNARE-associated protein Snapin
S100a4	-0.339339851	0.93280057	0.072155566	0.788223751	0.999827379	NS	S100 calcium binding protein A4
S100a6	-0.010323544	2.30157739	0.000149057	0.990258952	0.999827379	NS	S100 calcium binding protein A6 (calcyclin)
Mapk7	-0.400702055	4.56969062	1.000239292	0.317252613	0.999827379	NS	Mitogen-activated protein kinase 7
Epn2	0.29744958	5.2487932	0.900894286	0.342542033	0.999827379	NS	Epsin-2
B9d1	-0.331246719	3.42367873	0.32507305	0.568574759	0.999827379	NS	B9 domain-containing protein 1
Sec24b	-0.042264552	6.18906794	0.026712738	0.870171759	0.999827379	NS	Sec24 related gene family	member B (S. cerevisiae)
N4bp3	-0.181153284	2.43370924	0.052023267	0.819579309	0.999827379	NS	NEDD4-binding protein 3
Rmnd5b	0.072806233	5.5510526	0.06757081	0.794907079	0.999827379	NS	B
Nhp2	-0.182879448	2.96404506	0.0764675	0.782142883	0.999827379	NS	H/ACA ribonucleoprotein complex subunit 2
Vps9d1	0.299270943	4.66186955	0.530371268	0.466450812	0.999827379	NS	VPS9 domain containing 1
Zfp276	0.147510422	3.64989188	0.077391028	0.780864646	0.999827379	NS	zinc finger protein (C2H2 type) 276
Mfsd10	-0.475230621	4.9336974	1.756276439	0.185089638	0.999827379	NS	Mus musculus major facilitator superfamily domain containing 10 (Mfsd10)	transcript variant 3	mRNA
Luzp1	0.100262416	4.55416644	0.062965684	0.801868508	0.999827379	NS	Leucine zipper protein 1
Kctd10	-0.141487628	5.6782916	0.260250282	0.60994826	0.999827379	NS	potassium channel tetramerisation domain containing 10
Poldip2	-0.009544799	5.71458796	0.001278471	0.971477145	0.999827379	NS	Polymerase delta-interacting protein 2
Ift20	-0.164526679	5.95037961	0.349615479	0.554330879	0.999827379	NS	Intraflagellar transport
Col6a1	-1.690023268	4.82118387	1.632368753	0.20137573	0.999827379	NS	Collagen alpha-1(VI) chain
Pcbp3	-0.045448454	6.58351121	0.029314398	0.864055124	0.999827379	NS	Mus musculus poly(rC) binding protein 3 (Pcbp3)	transcript variant 2	mRNA.
Lgals9	-0.09847586	1.72349723	0.008492926	0.926573243	0.999827379	NS	Galectin-9
Araf	-0.207197963	7.17060663	0.514739868	0.473094171	0.999827379	NS	Serine/threonine-protein kinase A-Raf
Cfp	0.315855622	-0.41944236	0.02043235	0.886336168	0.999827379	NS	complement factor properdin
Uxt	-0.427173822	3.40071937	0.564773132	0.452343443	0.999827379	NS	ubiquitously expressed transcript
Cnnm3	-0.496447039	4.17222865	1.064225886	0.302253333	0.999827379	NS	Mus musculus cyclin M3 (Cnnm3)	transcript variant 3	mRNA.
Lman2l	-0.067844309	5.08179294	0.031970108	0.858093278	0.999827379	NS	VIP36-like protein
Mcm3ap	-0.048558139	5.51957634	0.00932464	0.923072507	0.999827379	NS	minichromosome maintenance complex component 3 associated protein
Pcnt	-0.401625994	4.37186745	0.629259946	0.427626901	0.999827379	NS	pericentrin
Mxd1	0.097460774	5.95645956	0.131368386	0.717017448	0.999827379	NS	MAX dimerization protein 1
Gmcl1	-0.192452564	5.11773105	0.343757683	0.557668205	0.999827379	NS	germ cell-less	spermatogenesis associated 1
Snrnp27	0.206188919	4.82569939	0.354708499	0.551459789	0.999827379	NS	U4/U6.U5 small nuclear ribonucleoprotein 27 kDa protein
Oas1c	-0.762558613	1.38116514	0.447597465	0.503478094	0.999827379	NS	Inactive 2'-5' oligoadenylate synthetase 1C
Ocrl	-0.387892035	6.37993741	1.723557628	0.189235743	0.999827379	NS	Inositol polyphosphate 5-phosphatase OCRL-1
Calm1	0.208042121	10.01038571	0.092393786	0.761155728	0.999827379	NS	Calmodulin-1
Agpat3	-0.080246916	6.59141567	0.096059071	0.756611163	0.999827379	NS	1-acyl-sn-glycerol-3-phosphate acyltransferase gamma
Sema6b	0.873227034	1.3546934	0.465044679	0.495275725	0.999827379	NS	sema domain	transmembrane domain (TM)	and cytoplasmic domain	(semaphorin) 6B
Uhrf1	-0.456936213	3.34511588	0.541339066	0.461878303	0.999827379	NS	ubiquitin-like	containing PHD and RING finger domains	1
Dpp9	0.06676554	6.87949818	0.06373753	0.800683265	0.999827379	NS	Dipeptidyl peptidase 9
Ramp2	0.781789224	3.3162884	1.686145756	0.194109824	0.999827379	NS	Receptor activity-modifying protein 2
Lsr	0.383092588	6.93920386	1.872598158	0.171177806	0.999827379	NS	Lipolysis-stimulated lipoprotein receptor
Gramd1a	0.131022976	6.86227826	0.249218008	0.617626241	0.999827379	NS	GRAM domain-containing protein 1A
Hpn	1.269177518	1.85650575	1.527541077	0.216481861	0.999827379	NS	Serine protease hepsin Serine protease hepsin non-catalytic chain Serine protease hepsin catalytic c
Ckb	0.279855215	5.67762571	1.116279068	0.29072108	0.999827379	NS	Creatine kinase B-type
Sp1	0.143079276	3.82033095	0.083891875	0.772090942	0.999827379	NS	Transcription factor Sp1
Itgb7	1.009920655	0.8270505	0.309393344	0.578052692	0.999827379	NS	Integrin beta-7
Myg1	-0.109090146	4.54118186	0.081543789	0.775216115	0.999827379	NS	UPF0160 protein MYG1	mitochondrial
Rarg	-0.429565758	1.35324159	0.147465807	0.700968984	0.999827379	NS	Retinoic acid receptor gamma
Pfdn5	0.128416935	5.27847692	0.175156512	0.675569131	0.999827379	NS	Prefoldin subunit 5
Efnb2	0.651666563	1.49528238	0.354266381	0.551707915	0.999827379	NS	Ephrin-B2
Rrp15	0.35585433	3.87411764	0.482790339	0.487161119	0.999827379	NS	RRP15-like protein
Rnd2	0.626005079	1.94039077	0.429200105	0.512381706	0.999827379	NS	Rho family GTPase 2
Srr	0.042096369	4.97389026	0.012892536	0.909598248	0.999827379	NS	Serine racemase
Sync	0.091866195	1.0122628	0.005544544	0.940643022	0.999827379	NS	syncoilin
Fndc5	0.072201907	3.43876768	0.016042201	0.89921124	0.999827379	NS	Fibronectin type III domain-containing protein 5 Irisin
Cnn1	-0.995078994	2.14294687	0.462675241	0.496376342	0.999827379	NS	Calponin-1
Fbxo9	0.036496407	6.13716062	0.019736144	0.888276499	0.999827379	NS	F-box only protein 9
Vps50	-0.136400495	5.65223241	0.255619888	0.613145447	0.999827379	NS	VPS50 EARP/GARPII complex subunit
Hars	-0.029517405	5.09577436	0.008459869	0.92671588	0.999827379	NS	Histidine--tRNA ligase	cytoplasmic
Zmat2	0.173838913	5.26230347	0.320721287	0.5711745	0.999827379	NS	zinc finger	matrin type 2
Ube2c	-2.371175176	1.6951148	2.415560014	0.120135001	0.999827379	NS	ubiquitin-conjugating enzyme E2C
Smg5	-0.659107751	4.09309078	2.080552173	0.149186201	0.999827379	NS	Protein SMG5
Cct3	-0.018777668	7.29865498	0.003983912	0.949672351	0.999827379	NS	chaperonin containing Tcp1	subunit 3 (gamma)
Glmp	-0.00635441	6.18363889	0.000575734	0.980857038	0.999827379	NS	Glycosylated lysosomal membrane protein
Mef2d	-0.213868802	6.3798985	0.674123127	0.41161778	0.999827379	NS	Myocyte-specific enhancer factor 2D
Snd1	-0.118162931	8.50946217	0.074443984	0.784972944	0.999827379	NS	Staphylococcal nuclease domain-containing protein 1
Col18a1	-0.339449082	4.40984341	0.696822275	0.40385352	0.999827379	NS	Collagen alpha-1(XVIII) chain Endostatin Non-collagenous domain 1
Slc19a1	0.821013692	3.73104746	2.573637789	0.108657603	0.999827379	NS	solute carrier family 19 (folate transporter)	member 1
Kpnb1	0.428497613	5.19453065	1.730238428	0.188380451	0.999827379	NS	Importin subunit beta-1
Npepps	0.04674196	5.80336363	0.028513319	0.865907648	0.999827379	NS	Puromycin-sensitive aminopeptidase
Mrpl10	-0.155155873	6.01623785	0.293291499	0.58811894	0.999827379	NS	39S ribosomal protein L10	mitochondrial
Cyp51	0.450050333	6.50908555	2.611197033	0.106111638	0.999827379	NS	Lanosterol 14-alpha demethylase
Tcf25	0.072680625	8.30029881	0.034471442	0.852707583	0.999827379	NS	Transcription factor 25
Tubb6	0.418125003	4.45618445	0.659088753	0.416881832	0.999827379	NS	tubulin	beta 6 class V
Def8	0.059297867	5.98873436	0.045261465	0.831523978	0.999827379	NS	Differentially expressed in FDCP 8
Meox1	0.309309898	2.9566111	0.218924169	0.639860873	0.999827379	NS	Homeobox protein MOX-1
Irx2	0.543928231	4.01543653	0.915048334	0.338778486	0.999827379	NS	Iroquois-class homeodomain protein IRX-2
Col1a1	-1.897869341	6.81557475	1.671228357	0.196094087	0.999827379	NS	Collagen alpha-1(I) chain
Itga3	-0.064652367	5.13764404	0.030148559	0.862153577	0.999827379	NS	Integrin alpha-3 Integrin alpha-3 heavy chain Integrin alpha-3 light chain
Foxm1	-0.528968546	2.26554308	0.363478484	0.546580693	0.999827379	NS	forkhead box M1
Itfg2	0.283110271	4.67762127	0.590144226	0.442363353	0.999827379	NS	KICSTOR complex protein ITFG2
Nrip2	0.595642671	0.37338561	0.163376026	0.686067122	0.999827379	NS	Nuclear receptor-interacting protein 2
Tulp3	0.646752053	2.12506393	0.53178935	0.46585555	0.999827379	NS	tubby-like protein 3
Gtf2h4	0.371054242	3.47168475	0.425266232	0.514320925	0.999827379	NS	general transcription factor II H	polypeptide 4
Tubb5	0.211900558	6.1983842	0.51703632	0.472108649	0.999827379	NS	tubulin	beta 5 class I
Ell2	0.220760956	5.70090531	0.711012809	0.399107789	0.999827379	NS	RNA polymerase II elongation factor ELL2
Jup	0.001570894	7.11247084	2.98E-05	0.995646649	0.999827379	NS	Junction plakoglobin
Fkbp10	-0.068993002	2.75804984	0.006784447	0.934354276	0.999827379	NS	Peptidyl-prolyl cis-trans isomerase FKBP10
Mnx1	-0.124313695	6.43043459	0.20640369	0.649600877	0.999827379	NS	motor neuron and pancreas homeobox 1
Nom1	-0.061283788	5.52895687	0.051060755	0.821227655	0.999827379	NS	Nucleolar MIF4G domain-containing protein 1
Ergic1	0.082737807	7.37385398	0.077313327	0.780971872	0.999827379	NS	Endoplasmic reticulum-Golgi intermediate compartment protein 1
Tnk1	-0.129366084	4.46613925	0.102078343	0.749349654	0.999827379	NS	Non-receptor tyrosine-protein kinase TNK1
Tcea3	0.029465131	0.0573771	0.000331302	0.985477945	0.999827379	NS	Transcription elongation factor A protein 3
Stk38l	0.011911523	5.26739554	0.001438251	0.969748057	0.999827379	NS	Mus musculus serine/threonine kinase 38 like (Stk38l)	transcript variant 2	mRNA.
Brpf1	0.400416401	5.99127312	1.358348736	0.243823865	0.999827379	NS	Peregrin
Akr1b3	-0.076205543	6.34625963	0.065678019	0.797736778	0.999827379	NS	Aldose reductase
Gstt1	0.261850624	3.95709668	0.285561133	0.593079204	0.999827379	NS	Glutathione S-transferase theta-1
Gstt3	0.992735853	0.64424065	0.503899275	0.477791807	0.999827379	NS	Mus musculus glutathione S-transferase	theta 3 (Gstt3)	transcript variant 2	mRNA.
Ddt	0.122601078	3.33124059	0.041179635	0.839191575	0.999827379	NS	D-dopachrome decarboxylase
Tat	-0.94644302	2.30045332	1.196314516	0.274059534	0.999827379	NS	tyrosine aminotransferase
Marveld3	0.279356349	5.64871367	1.063071199	0.30251576	0.999827379	NS	MARVEL domain containing 3
Ddx18	0.205300848	5.25299983	0.425613313	0.514149317	0.999827379	NS	ATP-dependent RNA helicase DDX18
Ubl3	0.04126463	8.96690555	0.006370237	0.936385376	0.999827379	NS	ubiquitin-like 3
Gramd3	-0.141506777	6.57827971	0.297157717	0.585669788	0.999827379	NS	GRAM domain containing 2B
Eef1e1	0.032562079	3.51149673	0.003446934	0.95318262	0.999827379	NS	Eukaryotic translation elongation factor 1 epsilon-1
Akt1	-0.003491338	7.95964524	0.000104383	0.991848309	0.999827379	NS	Mus musculus thymoma viral proto-onco 1 (Akt1)	transcript variant 3	mRNA.
Tcirg1	0.492174673	2.45147948	0.374295831	0.540671933	0.999827379	NS	T cell	immune regulator 1	ATPase	H+ transporting	lysosomal V0 protein A3
Naglu	-0.103121782	5.56592597	0.146022338	0.70236591	0.999827379	NS	alpha-N-acetylglucosaminidase (Sanfilippo disease IIIB)
Ppat	-0.062461611	5.6260673	0.051039693	0.821263905	0.999827379	NS	Coenzyme A synthase
Smo	0.155335319	3.20262475	0.056293855	0.812452561	0.999827379	NS	smoothened	frizzled class receptor
Tspan33	0.372208615	5.70953444	1.959696566	0.161545774	0.999827379	NS	Tetraspanin-33
Crnkl1	0.103524041	5.61435671	0.153860346	0.694873236	0.999827379	NS	Crooked neck-like protein 1
Rin2	0.44257165	3.66576594	0.710549882	0.399261325	0.999827379	NS	Ras and Rab interactor 2
Chordc1	0.030476173	5.2582971	0.008423559	0.926872877	0.999827379	NS	Cysteine and histidine-rich domain-containing protein 1
Rtcb	-0.041462044	7.61292273	0.018261334	0.892505531	0.999827379	NS	tRNA-splicing ligase RtcB homolog
Pwp1	-0.307059415	5.19518891	0.904427001	0.341597436	0.999827379	NS	Periodic tryptophan
Fbxo7	0.036329343	5.29018645	0.012669953	0.910378695	0.999827379	NS	Mus musculus F-box protein 7 (Fbxo7)	transcript variant 3	mRNA.
Capns1	0.048545845	4.46880082	0.013710589	0.906786972	0.999827379	NS	calpain small subunit 1
Lrp3	0.06185434	5.88398916	0.053873252	0.81645559	0.999827379	NS	LDL receptor related protein 3
Folr1	0.254922156	4.32678231	0.372737529	0.541515849	0.999827379	NS	Folate receptor alpha
Clpb	-0.123874718	5.08052384	0.143464998	0.704860348	0.999827379	NS	Caseinolytic peptidase B protein homolog
7-Sep	0.101145147	7.52514683	0.111269851	0.738703034	0.999827379	NS	septin-7 isoform 2
Zdhhc4	0.516576657	5.48655258	3.482133015	0.06203473	0.999827379	NS	zinc finger	DHHC domain containing 4
Rac1	-0.076818938	7.72824252	0.057358687	0.810720426	0.999827379	NS	RAS-related C3 botulinum substrate 1
Nup214	-0.435697514	5.57937792	2.565725255	0.109202466	0.999827379	NS	Nuclear pore complex protein Nup214
Ltbp1	0.492558309	1.43834698	0.195666216	0.65824193	0.999827379	NS	Latent-transforming growth factor beta-binding protein 1
Ugp2	0.234413681	5.51820606	0.741905281	0.389051232	0.999827379	NS	UDP-glucose pyrophosphorylase 2
Kcnh6	0.022422215	6.41982307	0.007424072	0.931336799	0.999827379	NS	potassium voltage-gated channel	subfamily H (eag-related)	member 6
Trmt1	0.543358336	4.55237895	1.88794219	0.169434205	0.999827379	NS	tRNA methyltransferase 1
Nacc1	0.57811691	3.99403061	1.320815046	0.250445828	0.999827379	NS	Nucleus accumbens-associated protein 1
Nfix	0.243477144	3.627388	0.191056581	0.662038686	0.999827379	NS	Nuclear factor 1 X-type
Slc1a5	0.908360383	2.20267866	0.357452981	0.549924199	0.999827379	NS	solute carrier family 1 (neutral amino acid transporter)	member 5
Uba1	0.064689094	7.97050704	0.034321715	0.853024163	0.999827379	NS	ubiquitin-like modifier activating enzyme 1
Siae	-0.026995654	5.01609244	0.00585006	0.939032703	0.999827379	NS	Sialate O-acetylesterase Sialate O-acetylesterase small subunit Sialate O-acetylesterase large subun
Vsig2	1.398658353	0.58462863	0.950495863	0.329593112	0.999827379	NS	V-set and immunoglobulin domain containing 2
Esam	-0.0040911	2.105825	2.01E-05	0.996426364	0.999827379	NS	Endothelial cell-selective adhesion molecule
Spa17	-0.276072565	3.21066422	0.196212527	0.657795512	0.999827379	NS	sperm autoantigenic protein 17
Fam50a	-0.045507499	4.95212615	0.011368222	0.915088974	0.999827379	NS	Protein FAM50A
Emd	0.196558197	4.67574232	0.292053036	0.588907891	0.999827379	NS	Emerin
Taco1	-0.381887013	2.14539342	0.190226311	0.662728328	0.999827379	NS	Translational activator of cytochrome c oxidase 1
Grik3	1.885806487	1.25861804	1.211180239	0.271098505	0.999827379	NS	Glutamate receptor ionotropic	kainate 3
Gria3	0.285325164	3.05648338	0.189294227	0.663504676	0.999827379	NS	Mus musculus glutamate receptor	ionotropic	AMPA3 (alpha 3) (Gria3)	transcript variant 5	mRNA.
Sipa1l2	-0.386232871	2.86139722	0.267764618	0.604835242	0.999827379	NS	Mus musculus signal-induced proliferation-associated 1 like 2 (Sipa1l2)	transcript variant 2	mRNA.
Ap4e1	-0.612094287	3.55298718	0.611787729	0.434115491	0.999827379	NS	AP-4 complex subunit epsilon-1
Blvra	0.152307943	3.60514845	0.078899187	0.778794778	0.999827379	NS	Biliverdin reductase A
Idh3g	0.026599539	6.83447706	0.01075621	0.917397784	0.999827379	NS	isocitrate dehydrogenase 3 (NAD+)	gamma
Pnck	0.647257341	3.11956846	0.985029377	0.32096028	0.999827379	NS	pregnancy upregulated non-ubiquitously expressed CaM kinase
Ssr4	-0.07941221	6.89451938	0.069188224	0.792522411	0.999827379	NS	signal sequence receptor	delta
Bcap31	0.05865045	6.48299397	0.049512578	0.823913604	0.999827379	NS	B-cell receptor-associated protein 31
Fam98a	-0.759495656	4.73593717	3.942877202	0.047070206	0.999827379	NS	Protein FAM98A
Ltbp2	1.10289982	3.42271326	3.199101562	0.073678735	0.999827379	NS	latent transforming growth factor beta binding protein 2
Kmt2a	0.28897221	5.21344482	0.861825051	0.353228468	0.999827379	NS	Mus musculus lysine (K)-specific methyltransferase 2A (Kmt2a)	transcript variant 1	mRNA.
Ift46	-0.8231512	4.64832717	4.637001334	0.03128963	0.999827379	NS	Intraflagellar transport
Tmem25	-0.445610079	5.06358654	1.538885575	0.214783761	0.999827379	NS	Mus musculus transmembrane protein 25 (Tmem25)	transcript variant 5	mRNA.
Trappc6a	-0.669568006	3.73382162	1.703209238	0.191868813	0.999827379	NS	trafficking protein particle complex 6A
Supt6	-0.520535459	6.40465002	4.33917975	0.037244863	0.999827379	NS	Transcription elongation factor SPT6
Spag5	-0.02748211	2.09724583	0.000947484	0.975444009	0.999827379	NS	Sperm-associated antigen 5
Foxn1	-1.46997745	0.94036314	0.766670938	0.381248899	0.999827379	NS	Forkhead box protein N1
Unc119	0.380222914	4.01832986	0.676968146	0.410632691	0.999827379	NS	unc-119 lipid binding chaperone
Rab34	-0.021574017	4.42008534	0.002809408	0.957728844	0.999827379	NS	RAB34	member RAS oncogene family
Sdf2	-0.012924884	5.35785127	0.001991263	0.964407358	0.999827379	NS	stromal cell derived factor 2
Ccne1	-0.167105192	2.69369623	0.050330724	0.822488785	0.999827379	NS	G1/S-specific cyclin-E1
Bbc3	-0.033392428	1.51345534	0.00090385	0.976015933	0.999827379	NS	Bcl-2-binding component 3
Psmc3	0.038663583	6.18903179	0.020888273	0.885083738	0.999827379	NS	proteasome (prosome	macropain) 26S subunit	ATPase 3
Acp2	0.083391445	6.08177117	0.070043923	0.79127284	0.999827379	NS	Mus musculus acid phosphatase 2	lysosomal (Acp2)	transcript variant 1	mRNA.
Slc39a13	-0.552375889	4.95152801	2.509170649	0.113185484	0.999827379	NS	solute carrier family 39 (metal ion transporter)	member 13
Celf2	0.610089618	5.08390025	3.153497902	0.07576439	0.999827379	NS	CUGBP Elav-like family member 2
Nr1h3	0.424720516	3.44301409	0.515507901	0.472764199	0.999827379	NS	Mus musculus nuclear receptor subfamily 1	group H	member 3 (Nr1h3)	transcript variant 3	mRNA.
Ddb2	-0.147580595	2.51818093	0.03744886	0.846554032	0.999827379	NS	DNA damage-binding protein 2
Spi1	0.789284893	0.22707419	0.241170621	0.623361906	0.999827379	NS	spleen focus forming virus (SFFV) proviral integration oncogene
Sf3a1	-0.05106509	5.91228605	0.036500346	0.848485921	0.999827379	NS	Splicing factor 3A subunit 1
Stat6	-0.15537673	5.21575512	0.210955827	0.646019266	0.999827379	NS	Signal transducer and transcription activator 6
Vrk3	-0.035610237	4.88054317	0.010269496	0.919281739	0.999827379	NS	vaccinia related kinase 3
Smg9	-0.007791788	4.23628892	0.000332451	0.98545279	0.999827379	NS	Protein SMG9
Paxip1	-0.1880985	7.04974209	0.475458279	0.490486764	0.999827379	NS	PAX-interacting protein 1
Rmnd5a	-0.345598392	5.89969931	1.626069443	0.202247563	0.999827379	NS	A
Mov10	0.445056529	5.03201861	1.58232954	0.208425461	0.999827379	NS	Putative helicase MOV-10
Rhoc	0.077934264	2.42630131	0.009310554	0.923130451	0.999827379	NS	Rho-related GTP-binding protein RhoC
Def6	0.041130414	0.90808916	0.001020043	0.974521404	0.999827379	NS	DEF6	guanine nucleotide exchange factor
Peg3	-0.08450101	10.52123174	0.011749912	0.913680771	0.999827379	NS	Paternally-expressed 3 protein
Zim1	0.532863708	5.18204546	2.147453996	0.14280653	0.999827379	NS	zinc finger	imprinted 1
Metrn	-0.01638643	0.80752575	0.000152999	0.990130997	0.999827379	NS	meteorin	glial cell differentiation regulator
Lmf1	0.119750457	4.44478897	0.092518135	0.76099995	0.999827379	NS	Lipase maturation factor 1
Narfl	-0.094433145	5.30944079	0.096229208	0.756402536	0.999827379	NS	Cytosolic Fe-S cluster assembly factor NARFL
Angptl4	-1.097366261	0.66948159	0.608006272	0.435539473	0.999827379	NS	Angiopoietin-related protein 4
Dbf4	-0.703430009	2.24025834	0.680986445	0.409247252	0.999827379	NS	A
Daxx	0.182374265	4.80602433	0.273245198	0.601163127	0.999827379	NS	Mus musculus Fas death domain-associated protein (Daxx)	transcript variant 3	mRNA.
Cd320	-0.050972492	2.8231305	0.005249894	0.942238897	0.999827379	NS	CD320 antigen
Ipo4	0.049623511	6.15650591	0.032331496	0.857302039	0.999827379	NS	Importin-4
Tm9sf1	0.034320259	6.64397086	0.015564158	0.90071641	0.999827379	NS	Transmembrane 9 superfamily member 1
Rec8	-0.769565185	0.87152144	0.347976099	0.555261053	0.999827379	NS	Meiotic recombination
Irf9	0.080764815	3.30437899	0.013553724	0.907319319	0.999827379	NS	Interferon regulatory factor 9
Gmpr2	0.189304436	3.92200155	0.157735114	0.69125036	0.999827379	NS	guanosine monophosphate reductase 2
Mdp1	-0.177334704	4.73391167	0.161043017	0.688198046	0.999827379	NS	Magnesium-dependent phosphatase 1
Dhrs1	-0.743878163	4.27295823	3.032424981	0.081615952	0.999827379	NS	Dehydrogenase/reductase SDR family member 1
Tmem161a	-0.037234327	5.34694987	0.015040848	0.90239128	0.999827379	NS	Transmembrane protein 161A
Armc6	-0.188764196	3.39622312	0.103944869	0.747146033	0.999827379	NS	Armadillo repeat-containing protein 6
Borcs8	0.181759688	3.09192086	0.080563059	0.776535816	0.999827379	NS	BLOC-1-related complex subunit 8
Slc25a42	-0.181277135	3.70160941	0.11962333	0.729443378	0.999827379	NS	Mitochondrial coenzyme A transporter SLC25A42
Snx9	0.147840921	5.3488134	0.246296881	0.619694712	0.999827379	NS	sorting nexin 9
Ranbp3	-0.030104382	6.50689599	0.013895671	0.90616282	0.999827379	NS	Ran-binding protein 3
Ndufa11	-0.139374083	6.01514977	0.297557809	0.585417521	0.999827379	NS
Nr2f6	0.047245664	5.82052496	0.031446594	0.859247714	0.999827379	NS	Nuclear receptor subfamily 2 group F member 6
Use1	0.051052551	4.45233017	0.016967095	0.896362465	0.999827379	NS	unconventional SNARE in the ER 1 homolog (S. cerevisiae)
Ocel1	0.232561119	3.84494132	0.231215897	0.630623721	0.999827379	NS	occludin/ELL domain containing 1
Dyrk1b	-0.333708857	3.30469438	0.30115281	0.583160613	0.999827379	NS	Dual specificity tyrosine-phosphorylation-regulated kinase 1B
Braf	-0.080873202	6.32062761	0.101467345	0.750075818	0.999827379	NS	Serine/threonine-protein kinase B-raf
Ndufb2	-0.103270986	5.38070027	0.121451016	0.727466043	0.999827379	NS	NADH dehydrogenase [ubiquinone] 1 beta subcomplex subunit 2	mitochondrial
Hltf	-0.670510303	4.89519998	3.473032667	0.062376853	0.999827379	NS	Helicase-like transcription factor
Prpf6	0.124942598	6.89285638	0.228819758	0.632400345	0.999827379	NS	Pre-mRNA-processing factor 6
Rgs19	0.441983601	1.77860872	0.186079341	0.66619998	0.999827379	NS	regulator of G-protein signaling 19
Abhd3	-0.860308778	2.51649693	1.244291459	0.264645585	0.999827379	NS	abhydrolase domain containing 3
Snrpd1	0.225533823	4.44646632	0.327901027	0.566897661	0.999827379	NS	Small nuclear ribonucleoprotein Sm D1
Tchp	0.552026486	3.92466396	1.294400188	0.255238633	0.999827379	NS	Trichoplein keratin filament-binding protein
Tsc2	0.269516236	6.38003637	0.966983594	0.325433616	0.999827379	NS	tuberous sclerosis 2
Slc9a3r2	0.172635037	3.21758641	0.073883472	0.785764161	0.999827379	NS	solute carrier family 9 (sodium/hydrogen exchanger)	member 3 regulator 2
Puf60	-0.0055686	7.48488333	0.000358095	0.984902209	0.999827379	NS	Poly(U)-binding-splicing factor PUF60
Golga2	-0.334614516	6.21672946	1.655137191	0.198261172	0.999827379	NS	golgi autoantigen	golgin subfamily a	2
Uck1	-0.000287141	5.77307449	1.01E-06	0.999200071	0.999827379	NS	uridine-cytidine kinase 1
Scin	-0.313272361	2.04222484	0.044247727	0.833393392	0.999827379	NS	scinderin
Ikzf4	-0.235403654	3.1622618	0.130582015	0.717829348	0.999827379	NS	Mus musculus IKAROS family zinc finger 4 (Ikzf4)	transcript variant 3	mRNA.
Mien1	-0.018163283	6.05134544	0.005076571	0.943198742	0.999827379	NS	Migration and invasion enhancer 1
Axl	-0.605304912	4.37228291	0.678720897	0.410027527	0.999827379	NS	AXL receptor tyrosine kinase
Tgfb1	-0.469853975	-0.26986125	0.06428731	0.799843675	0.999827379	NS	transforming growth factor	beta 1
Ccdc97	0.452997792	5.23847366	1.577118838	0.20917619	0.999827379	NS	Coiled-coil domain-containing protein 97
Zfp40	-0.528899991	4.07312079	0.896967947	0.343596019	0.999827379	NS	zinc finger protein 40
Akap8l	0.364151764	5.82981279	1.586167571	0.207874537	0.999827379	NS	A-kinase anchoring protein 8 like
Pdcd2l	0.235616729	4.44135468	0.340828035	0.559351654	0.999827379	NS	Programmed cell death protein 2-like
Gtf2f1	0.144484875	5.00342338	0.170721762	0.67947115	0.999827379	NS	ral transcription factor IIF subunit 1
Clpp	0.056914613	5.25226143	0.034107061	0.853479272	0.999827379	NS	ATP-dependent Clp protease proteolytic subunit	mitochondrial
Alkbh7	0.128076696	3.31291255	0.047862373	0.82682555	0.999827379	NS	Alpha-ketoglutarate-dependent dioxygenase alkB homolog 7	mitochondrial
Dennd1c	1.764722114	1.87239934	3.112935923	0.077672832	0.999827379	NS	DENN domain-containing protein 1C
Med6	-0.28597822	4.08567831	0.374435441	0.540596444	0.999827379	NS	Mus musculus mediator complex subunit 6 (Med6)	transcript variant 1	mRNA.
Prkd1	-0.43867587	4.66158066	1.205358174	0.272253376	0.999827379	NS	protein kinase D1
Cse1l	0.205379517	6.74814684	0.57122307	0.44977331	0.999827379	NS	Exportin-2
Naa20	0.049917504	6.54942732	0.03828631	0.844869345	0.999827379	NS	N-alpha-acetyltransferase 20
Prkra	0.602222321	3.02818396	0.824995602	0.363723606	0.999827379	NS	Interferon-inducible double-stranded RNA-dependent protein kinase activator A
Fkbp7	-0.342825154	1.17655597	0.070080691	0.791219331	0.999827379	NS	Mus musculus FK506 binding protein 7 (Fkbp7)	transcript variant 2	mRNA.
Plekha3	0.063039146	5.3530343	0.046639763	0.829017048	0.999827379	NS	Pleckstrin homology domain-containing family A member 3
Ykt6	-0.52038362	5.46443055	3.47747003	0.062209782	0.999827379	NS	YKT6 v-SNARE homolog (S. cerevisiae)
Baz1b	0.002436914	6.27054759	8.84E-05	0.992498319	0.999827379	NS	Tyrosine-protein kinase BAZ1B
Pex6	-0.120987088	5.73436511	0.198908973	0.655602936	0.999827379	NS	Peroxisome assembly factor 2
Mrpl2	-0.196705213	5.17341385	0.389632628	0.532492571	0.999827379	NS	mitochondrial ribosomal protein L2
Mea1	-0.020540628	4.80027122	0.003497469	0.952841076	0.999827379	NS	Male-enhanced antigen 1
Gnmt	1.214842351	1.00999556	0.892087402	0.344912268	0.999827379	NS	glycine N-methyltransferase
Grin2d	-0.201776019	0.60371542	0.021271042	0.884042998	0.999827379	NS	Glutamate receptor ionotropic	NMDA 2D
Kdelr1	-0.125620411	5.99434002	0.235478074	0.627491337	0.999827379	NS	KDEL (Lys-Asp-Glu-Leu) endoplasmic reticulum protein retention receptor 1
Tmem143	-0.694105122	1.8137965	0.477528429	0.489543975	0.999827379	NS	transmembrane protein 143
Ggct	0.394169902	2.81468401	0.265193754	0.606574219	0.999827379	NS	Gamma-glutamylcyclotransferase
Jag2	-0.295045735	5.40526861	1.097728795	0.29476508	0.999827379	NS	Protein jagged-2
Btbd6	0.076408812	4.91643187	0.043994408	0.833864016	0.999827379	NS	BTB/POZ domain-containing protein 6
Nudt14	0.08309995	4.25761909	0.038225195	0.844991638	0.999827379	NS	Uridine diphosphate glucose pyrophosphatase
Epdr1	0.207976154	3.75010473	0.169614039	0.680455051	0.999827379	NS	Mammalian ependymin-related protein 1
Flii	-0.016175217	6.42442622	0.003639185	0.951896268	0.999827379	NS	isoform 2
Top3a	-0.258239306	3.94431828	0.22141075	0.637967093	0.999827379	NS	topoisomerase (DNA) III alpha
Atg4d	-0.04231402	5.07914633	0.017263699	0.895465695	0.999827379	NS	Cysteine protease ATG4D Cysteine protease ATG4D	mitochondrial
Qtrt1	-0.417818223	4.17288644	0.726975853	0.393865192	0.999827379	NS	Queuine tRNA-ribosyltransferase catalytic subunit 1
Hdgfl2	-0.20297875	5.46840302	0.504770835	0.477411326	0.999827379	NS	Mus musculus HDGF like 2 (Hdgfl2)	transcript variant 4	mRNA.
Chaf1a	0.440565048	3.16750157	0.33193941	0.564519319	0.999827379	NS	Chromatin assembly factor 1 subunit A
Adprh	-0.061721352	5.98496365	0.055214644	0.814225836	0.999827379	NS	[Protein ADP-ribosylarginine] hydrolase
Tmem39a	-0.104794511	6.14566122	0.1579121	0.691086115	0.999827379	NS	Transmembrane protein 39A
Timmdc1	0.178217717	4.09490067	0.139323984	0.70895399	0.999827379	NS	Complex I assembly factor TIMMDC1	mitochondrial
Pla1a	-0.01886791	0.72543136	0.000180601	0.989277723	0.999827379	NS	Phospholipase A1 member A
Mcm2	0.179463399	5.87419467	0.245940217	0.619948315	0.999827379	NS	DNA replication licensing factor MCM2
Tpra1	-0.191643741	4.54909199	0.238179049	0.625524406	0.999827379	NS	Transmembrane protein adipocyte-associated 1
Nab1	0.191396286	4.46355065	0.210845734	0.646105332	0.999827379	NS	NGFI-A-binding protein 1
Adgre5	0.354978274	3.1777469	0.311542735	0.576735041	0.999827379	NS	adhesion G protein-coupled receptor E5
Il17ra	0.127005639	5.3989975	0.198292134	0.656102932	0.999827379	NS	Interleukin-17 receptor A
Lamb1	-0.424694329	3.708289	0.444290038	0.505059071	0.999827379	NS	Laminin subunit beta-1
Kcnn1	0.561936802	2.53434191	0.497640091	0.480538885	0.999827379	NS	potassium calcium-activated channel subfamily N member 1
Arrdc2	-0.602193131	3.24230596	0.970026583	0.324673549	0.999827379	NS	Arrestin domain-containing protein 2
Cd36	0.485784544	2.32183972	0.283650384	0.594318546	0.999827379	NS	Platelet glycoprotein 4
Map2k7	0.154202192	5.80015372	0.307458871	0.579243726	0.999827379	NS	Dual specificity mitogen-activated protein kinase kinase 7
Timm44	0.60283986	4.52916685	1.869659087	0.17151413	0.999827379	NS	translocase of inner mitochondrial membrane 44
Ap2a2	-0.262559644	7.17316506	0.700177787	0.402723962	0.999827379	NS	Mus musculus adaptor-related protein complex 2	alpha 2 subunit (Ap2a2)	transcript variant 1	mRNA.
Pnkp	0.321094779	4.36076737	0.622001432	0.430304512	0.999827379	NS	polynucleotide kinase 3'- phosphatase
Med25	-0.008846642	6.75088627	0.00120505	0.972307934	0.999827379	NS	Mus musculus mediator complex subunit 25 (Med25)	transcript variant 3	mRNA.
Bcam	0.3076406	3.75782384	0.346942243	0.555849177	0.999827379	NS	Basal cell adhesion molecule
Clptm1	0.054364977	7.16230996	0.038585311	0.844272489	0.999827379	NS	Cleft lip and palate transmembrane
Relb	-0.197217208	3.45767874	0.111449585	0.738499801	0.999827379	NS	avian reticuloendotheliosis viral (v-rel) oncogene related B
Tomm40	-0.028725631	5.6741661	0.010196984	0.919566242	0.999827379	NS	Mitochondrial import receptor subunit TOM40 homolog
Apoe	0.139169971	5.34157928	0.081566703	0.775185385	0.999827379	NS	Apolipoprotein E
Prkar2b	-0.171243043	6.95896834	0.372616983	0.541581232	0.999827379	NS	protein kinase	cAMP dependent regulatory	type II beta
Cdkn1b	0.791902323	3.14508004	1.492041584	0.221899967	0.999827379	NS	Cyclin-dependent kinase inhibitor 1B
Klf4	1.053955632	3.25833549	2.686687871	0.101189954	0.999827379	NS	Krueppel-like factor 4
Ap1m1	0.079191631	6.34849165	0.092438194	0.761100082	0.999827379	NS	AP-1 complex subunit mu-1
Rab8a	-0.038346727	6.87084015	0.021211444	0.884204411	0.999827379	NS	RAB8A	member RAS oncogene family
Hmgn2	-0.114919235	8.73082673	0.059456955	0.807356312	0.999827379	NS	Non-histone chromosomal protein HMG-17
Fam32a	-0.050041546	6.69326315	0.039036155	0.843377053	0.999827379	NS	Protein FAM32A
Elf3	0.520913452	5.9299422	2.15873332	0.141761509	0.999827379	NS	ETS-related transcription factor Elf-3
Stard3nl	-0.119167607	4.93812863	0.117594576	0.731658152	0.999827379	NS	Mus musculus STARD3 N-terminal like (Stard3nl)	transcript variant 2	mRNA.
Stk11	-0.588965829	6.2323205	3.524813447	0.060456628	0.999827379	NS	Serine/threonine-protein kinase STK11
Efna2	0.009511865	4.36692605	0.000547695	0.981328899	0.999827379	NS	Ephrin-A2
Atp5d	0.016858832	6.61665828	0.004501013	0.946510383	0.999827379	NS	ATP synthase subunit delta	mitochondrial
Ppp5c	-0.146062778	6.12004916	0.318210126	0.572685284	0.999827379	NS	Serine/threonine-protein phosphatase 5
Cdk12	-0.11378613	2.8335986	0.026003221	0.871892453	0.999827379	NS	Cyclin-dependent kinase 12
Lipe	-1.261576465	2.13717147	2.014467256	0.15580595	0.999827379	NS	Hormone-sensitive lipase
Pafah1b2	-0.290414343	8.01007317	0.712064329	0.398759355	0.999827379	NS	Platelet-activating factor acetylhydrolase IB subunit beta
Tbc1d8	0.042753554	5.67145959	0.024027977	0.876813746	0.999827379	NS	Mus musculus TBC1 domain family	member 8 (Tbc1d8)	transcript variant 3	mRNA.
Cnot11	-0.389732228	4.56870514	0.956499746	0.328070343	0.999827379	NS	CCR4-NOT transcription complex subunit 11
Foxj2	-0.123785048	5.45819964	0.183932264	0.668015469	0.999827379	NS	Forkhead box protein J2
Sri	-0.104335432	6.29842209	0.168001595	0.681893995	0.999827379	NS	Sorcin
Dgcr2	-0.023264404	7.39613044	0.005968346	0.938420634	0.999827379	NS
Irf3	0.226323768	3.86643489	0.22492351	0.635313788	0.999827379	NS	interferon regulatory factor 3
Bcl2l12	0.203987667	0.11812937	0.016120476	0.898966964	0.999827379	NS	BCL2-like 12 (proline rich)
Zfp959	0.066030428	3.42628362	0.012365902	0.911456105	0.999827379	NS	zinc finger protein 959
Mpnd	0.389002259	5.56340805	2.008270082	0.156443619	0.999827379	NS	MPN domain-containing protein
Sh3gl1	0.165297241	6.4189825	0.384711543	0.535092422	0.999827379	NS	SH3-domain GRB2-like 1
Ebi3	-0.128665262	0.69919224	0.008811803	0.92521147	0.999827379	NS	Interleukin-27 subunit beta
Ccdc94	0.185293378	3.05351099	0.076314909	0.782354879	0.999827379	NS	Coiled-coil domain-containing protein 94
Ranbp2	-0.051468477	7.13023626	0.032550898	0.856823894	0.999827379	NS	E3 SUMO-protein ligase RanBP2
Grk5	-0.68381072	4.20109675	2.4790539	0.115371634	0.999827379	NS	G protein-coupled receptor kinase 5
Dvl3	-0.128788597	5.32387795	0.184388738	0.667628445	0.999827379	NS	Segment polarity DVL-3
Abcf3	-0.158479668	6.31376561	0.359225423	0.548936731	0.999827379	NS	ATP-binding cassette	sub-family F (GCN20)	member 3
Eif2b5	-0.195423121	6.0611142	0.540906808	0.462057159	0.999827379	NS	Translation initiation factor eIF-2B subunit epsilon
Cyth2	0.224643031	6.05295794	0.754947256	0.384914406	0.999827379	NS	Cytohesin-2
Sult2b1	0.130168481	2.72178746	0.032635318	0.856640362	0.999827379	NS	Sulfotransferase family cytosolic 2B member 1
Car11	-0.292753128	0.14175411	0.034234122	0.853209699	0.999827379	NS	Carbonic anhydrase-related protein 11
Dlgap1	-0.76668844	4.74142237	2.757704776	0.096787007	0.999827379	NS	Mus musculus DLG associated protein 1 (Dlgap1)	transcript variant 6	mRNA.
Plag1	0.570031267	1.27955871	0.181642434	0.669965542	0.999827379	NS	Zinc finger protein PLAG1
Mrpl4	-0.135895904	5.39234176	0.22069684	0.638509473	0.999827379	NS	39S ribosomal protein L4	mitochondrial
Keap1	-0.319275456	6.67824745	1.581421323	0.208556082	0.999827379	NS	Kelch-like ECH-associated protein 1
Ap1m2	-0.170729087	5.90791357	0.411867473	0.521023168	0.999827379	NS	adaptor related protein complex 1 mu 2 subunit
Glg1	-0.018744116	7.96982222	0.003051955	0.955943672	0.999827379	NS	Golgi apparatus protein 1
Btbd2	0.022472661	5.27701936	0.005441408	0.941196661	0.999827379	NS	BTB (POZ) domain containing 2
Csnk1g2	-0.001943978	7.49378726	4.07E-05	0.994911009	0.999827379	NS	Casein kinase I isoform gamma-2
Abhd17a	0.175517224	5.96322072	0.451694167	0.501531518	0.999827379	NS	abhydrolase domain containing 17A
Mob3a	0.538731885	4.21750418	1.563426918	0.211164158	0.999827379	NS	MOB kinase activator 3A
Cacnb3	-0.03465333	5.96208099	0.017529477	0.89466876	0.999827379	NS	Mus musculus calcium channel	voltage-dependent	beta 3 subunit (Cacnb3)	transcript variant 4	mRNA
Ccdc65	-0.252047973	0.38924712	0.01866321	0.891336417	0.999827379	NS	Coiled-coil domain-containing protein 65
Fkbp11	0.151973236	4.64707781	0.165979377	0.683710066	0.999827379	NS	Peptidyl-prolyl cis-trans isomerase FKBP11
Ddx23	1.25575109	1.46502051	1.19499055	0.27432521	0.999827379	NS	DEAD-box helicase 23
Pld3	-0.073842994	7.44268015	0.062335927	0.802841292	0.999827379	NS	Phospholipase D3
Grik5	-0.085931516	3.53965678	0.022759338	0.880084589	0.999827379	NS	Glutamate receptor ionotropic	kainate 5
Cd79a	0.060109979	3.44420362	0.009051796	0.924202891	0.999827379	NS	B-cell antigen receptor complex-associated protein alpha chain
Rabac1	0.066023513	6.78317297	0.068122203	0.794090729	0.999827379	NS	Prenylated Rab acceptor protein 1
Etv3	-0.292525346	4.54956715	0.493434993	0.482399021	0.999827379	NS	ETS translocation variant 3
Prkcsh	-0.085883562	6.24024092	0.110076739	0.740056787	0.999827379	NS	protein kinase C substrate 80K-H
Rab3b	0.658436844	7.63740752	4.202174841	0.040372171	0.999827379	NS	RAB3B	member RAS oncogene family
Fcgrt	-1.15267229	2.14483252	1.399518879	0.236804143	0.999827379	NS	Mus musculus Fc receptor	IgG	alpha chain transporter (Fcgrt)	transcript variant 2	mRNA.
Nosip	-0.43248572	4.40587692	1.076011697	0.299591483	0.999827379	NS	Nitric oxide synthase-interacting protein
Pih1d1	-0.882113393	3.32081733	2.172339178	0.140512358	0.999827379	NS	PIH1 domain-containing protein 1
Rps11	0.2383158	5.71810277	0.851533357	0.35611892	0.999827379	NS	ribosomal protein S11
Supt5	-0.212350115	7.43849838	0.518893063	0.471314252	0.999827379	NS	Transcription elongation factor SPT5
Paf1	-0.064964839	5.84393334	0.053088151	0.817774232	0.999827379	NS	RNA polymerase II-associated factor 1 homolog
Timm50	-0.091443525	5.04390843	0.073598563	0.786167573	0.999827379	NS	Mitochondrial import inner membrane translocase subunit TIM50
Med29	0.294992605	4.11551469	0.437149622	0.50850143	0.999827379	NS	Mediator of RNA polymerase II transcription subunit 29
Bicd1	-0.315350022	5.87915459	1.18007599	0.277340526	0.999827379	NS	Protein bicaudal D homolog 1
Ncstn	0.065195476	8.23675952	0.029517184	0.863590317	0.999827379	NS	Nicastrin
Pex19	-0.059313849	6.695377	0.05487473	0.814788137	0.999827379	NS	Peroxisomal biosis factor 19
Phyhip	0.155461841	1.34510259	0.017881452	0.893622767	0.999827379	NS	Phytanoyl-CoA hydroxylase-interacting protein
Crhr2	0.197830816	0.33543735	0.01471299	0.903455704	0.999827379	NS	Corticotropin-releasing factor receptor 2
Impdh1	0.084684233	7.53035546	0.080914975	0.776061274	0.999827379	NS	Inosine-5'-monophosphate dehydrogenase 1
Dusp3	-0.060892728	3.44969756	0.011597865	0.914238917	0.999827379	NS	Dual specificity protein phosphatase 3
Prodh	0.755729737	0.26521436	0.241789247	0.622916803	0.999827379	NS	Proline dehydrogenase 1	mitochondrial
Dgcr14	0.038538503	4.75886751	0.011393251	0.914995906	0.999827379	NS	protein DGCR14 isoform 2
Slc25a1	0.087984903	6.96062889	0.109528113	0.740682014	0.999827379	NS	Tricarboxylate transport protein	mitochondrial
Dgcr6	-0.268589632	4.41184272	0.399366006	0.52741686	0.999827379	NS
Ddr1	-0.107892961	8.0265418	0.09714869	0.755278526	0.999827379	NS	Epithelial discoidin domain-containing receptor 1
Klc4	0.207468911	4.70725285	0.333456013	0.563631114	0.999827379	NS	Mus musculus kinesin light chain 4 (Klc4)	transcript variant 2	mRNA.
Ercc1	0.342347092	3.24344953	0.313949268	0.575266808	0.999827379	NS	DNA excision repair protein ERCC-1
As3mt	-0.004315002	5.68372696	0.000194536	0.988871759	0.999827379	NS	Arsenite methyltransferase
Crtc1	0.044359608	5.67070201	0.027021226	0.86943095	0.999827379	NS	CREB-regulated transcription coactivator 1
Rnf215	-0.442335192	3.93402925	0.828900602	0.362590624	0.999827379	NS	RING finger protein 215
Aven	0.545351367	3.66641218	1.075476019	0.29971181	0.999827379	NS	Cell death regulator Aven
Cp	-2.757782359	1.49213211	4.209046824	0.040208925	0.999827379	NS	Ceruloplasmin
Crot	-0.458698224	5.72837865	2.820979981	0.093039583	0.999827379	NS	Peroxisomal carnitine O-octanoyltransferase
Rps6ka1	0.209122292	3.12573107	0.109783939	0.740390253	0.999827379	NS	ribosomal protein S6 kinase polypeptide 1
Snrnp200	-0.267753416	7.33748299	0.746065309	0.387724844	0.999827379	NS	U5 small nuclear ribonucleoprotein 200 kDa helicase
Ciao1	0.088737774	4.54659917	0.05578924	0.813279451	0.999827379	NS	Probable cytosolic iron-sulfur protein assembly protein CIAO1
Taf6l	-0.072288865	4.98487108	0.042484032	0.836699871	0.999827379	NS	TATA-box binding protein associated factor 6 like
Insig2	-0.117694482	6.22501612	0.207511847	0.648724622	0.999827379	NS	Insulin-induced 2 protein
Kpna6	-0.119954194	4.29100986	0.059911253	0.806636263	0.999827379	NS	Importin subunit alpha-7
Man1a	-0.04154712	6.21285106	0.025274122	0.873685915	0.999827379	NS	mannosidase 1	alpha
Itpkc	0.286532094	3.88700326	0.259805085	0.610254096	0.999827379	NS	Inositol-trisphosphate 3-kinase C
Coq8b	-0.065976246	4.32390827	0.024333592	0.876039105	0.999827379	NS	coenzyme Q8B
Brd8	-0.153672102	7.01104155	0.306870161	0.57960716	0.999827379	NS	Bromodomain-containing protein 8
Kif20a	-1.147195638	3.33409086	3.292155269	0.069611591	0.999827379	NS	Kinesin-like protein KIF20A
Farsa	0.246481467	5.36254667	0.686951587	0.407203198	0.999827379	NS	Phenylalanine--tRNA ligase alpha subunit
Gcdh	-0.42858154	4.88205053	1.511618321	0.218892311	0.999827379	NS	Glutaryl-CoA dehydrogenase	mitochondrial
Mast2	-0.373782324	5.5796242	1.555112793	0.212382239	0.999827379	NS	microtubule associated serine/threonine kinase 2
Dnase2a	-0.073821333	3.08607005	0.013625721	0.907074601	0.999827379	NS	Deoxyribonuclease-2-alpha
Rad23a	-0.097801671	5.98000599	0.13493646	0.71336767	0.999827379	NS	RAD23 homolog A	nucleotide excision repair protein
Calr	0.08415639	9.29010261	0.019759918	0.888209668	0.999827379	NS	Calreticulin
Syce2	0.370725426	3.3043401	0.397862975	0.528194975	0.999827379	NS	Synaptonemal complex central element protein 2
Nfat5	0.148009023	3.99175375	0.077352016	0.780918475	0.999827379	NS	nuclear factor of activated T cells 5
Nob1	-0.35186831	4.96705106	0.964374067	0.32608729	0.999827379	NS	NIN1/RPN12 binding protein 1 homolog
Nqo1	-0.580186289	3.2456094	0.889718084	0.345553716	0.999827379	NS	NAD(P)H dehydrogenase [quinone] 1
Ppfia3	0.099171653	1.48717464	0.007546687	0.930773519	0.999827379	NS	protein tyrosine phosphatase	receptor type	f polypeptide (PTPRF)	interacting protein (liprin)	al
Gys1	0.143952971	4.0265966	0.064320464	0.799793165	0.999827379	NS	Glycogen [starch] synthase	muscle
Ruvbl2	-0.174412049	4.39685565	0.182753439	0.66901758	0.999827379	NS	RuvB-like protein 2
Lin7b	-0.240992538	0.05639287	0.023448643	0.878296155	0.999827379	NS	B
Bax	-0.041745531	5.67236361	0.023813247	0.877361044	0.999827379	NS	Apoptosis regulator BAX
Tfam	0.081201115	5.15275415	0.064286885	0.799844322	0.999827379	NS	transcription factor A	mitochondrial
Zfp81	-0.061812766	3.23129319	0.009814546	0.921083971	0.999827379	NS	zinc finger protein 81
Efnb3	0.699915625	2.96218287	1.118603193	0.290219422	0.999827379	NS	Ephrin-B3
Mmd	0.440559236	3.77361491	0.608826569	0.43522997	0.999827379	NS	Monocyte to macrophage differentiation factor
Hlf	-0.730074886	2.82392825	0.956935283	0.327960241	0.999827379	NS	Hepatic leukemia factor
Fam162a	-0.256163961	3.39490024	0.2023862	0.652801629	0.999827379	NS	Protein FAM162A
Rpl8	0.215901707	6.4109279	0.666338345	0.414331147	0.999827379	NS	60S ribosomal protein L8
Ssbp2	-0.041452459	5.976456	0.02392845	0.877067104	0.999827379	NS	Single-stranded DNA-binding protein 2
Fancl	-0.088258314	3.62818056	0.023451684	0.878288325	0.999827379	NS	E3 ubiquitin-protein ligase FANCL
Brinp2	-0.39474333	1.34429918	0.05473647	0.815017378	0.999827379	NS	BMP/retinoic acid-inducible neural-specific protein 2
Gstm5	-0.211794164	3.98663181	0.204477473	0.651130776	0.999827379	NS	Glutathione S-transferase Mu 5
Gstm7	0.545147438	2.33306753	0.429675011	0.512148458	0.999827379	NS	Glutathione S-transferase Mu 7
Stat3	-0.072474828	8.25395017	0.034440441	0.852773072	0.999827379	NS	Signal transducer and activator of transcription 3
Stat5a	0.58392093	4.79260873	2.491838736	0.114437956	0.999827379	NS	signal transducer and activator of transcription 5A
Cavin1	-0.581039169	2.25448055	0.403982795	0.525039511	0.999827379	NS	Caveolae-associated protein 1
Map3k11	-0.226871734	5.58594488	0.706020461	0.400768096	0.999827379	NS	Mitogen-activated protein kinase kinase kinase 11
Akt2	0.221380551	6.72270867	0.599264222	0.438858897	0.999827379	NS	Mus musculus thymoma viral proto-onco 2 (Akt2)	transcript variant 4	mRNA.
Dnaja3	-0.212521643	6.8989309	0.666542312	0.414259718	0.999827379	NS	DnaJ homolog subfamily A member 3	mitochondrial
Hmox2	0.004963688	6.21695186	0.000297438	0.986240047	0.999827379	NS	Mus musculus heme oxygenase 2 (Hmox2)	transcript variant 3	mRNA.
Cdip1	-0.083040043	6.33263181	0.098617905	0.753494549	0.999827379	NS	Mus musculus cell death inducing Trp53 target 1 (Cdip1)	transcript variant 5	mRNA.
Map3k20	-0.027486214	2.91729499	0.001422572	0.969913323	0.999827379	NS	Mitogen-activated protein kinase kinase kinase 20
Cwc15	-0.360295502	5.36977324	1.518642233	0.21782508	0.999827379	NS	Spliceosome-associated
Col5a3	-2.292004096	0.62238336	1.643804091	0.19980433	0.999827379	NS	collagen	type V	alpha 3
Dnmt1	-0.405304951	5.69363713	2.471485453	0.115928317	0.999827379	NS	DNA (cytosine-5)-methyltransferase 1
Ppan	0.3632099	4.74260668	0.986383664	0.320627848	0.999827379	NS	Suppressor of SWI4 1 homolog
Angptl2	-2.835878484	2.77275378	4.308905328	0.037913351	0.999827379	NS	Angiopoietin-related protein 2
Trmt10a	0.231390542	3.50439446	0.172418607	0.6779712	0.999827379	NS	tRNA methyltransferase 10A
Kifc2	-1.181069797	2.77603411	2.646361024	0.103787236	0.999827379	NS	Mus musculus kinesin family member C2 (Kifc2)	transcript variant 5	mRNA.
Psap	-0.057014036	9.82695189	0.00763425	0.930374082	0.999827379	NS	prosaposin
Ikbkg	-0.248660038	4.84858794	0.486303584	0.485580841	0.999827379	NS	NF-kappa-B essential modulator
Wars2	-0.533848444	2.30782134	0.360354863	0.54830922	0.999827379	NS	tryptophanyl tRNA synthetase 2 (mitochondrial)
Atn1	0.631818546	2.03882402	0.475643867	0.49040212	0.999827379	NS	Atrophin-1
Phb2	0.110871887	6.37881678	0.196434884	0.657614026	0.999827379	NS	Prohibitin-2
Ptpn6	-0.109816605	5.61206575	0.168288722	0.681637174	0.999827379	NS	protein tyrosine phosphatase	non-receptor type 6
Eno2	0.393903622	4.30839977	0.890453557	0.345354428	0.999827379	NS	Gamma-enolase
Emg1	-0.173719504	5.12848817	0.292446269	0.588657151	0.999827379	NS	Ribosomal RNA small subunit methyltransferase NEP1
Lpcat3	-0.060973044	7.03009259	0.047584867	0.827320376	0.999827379	NS	Lysophospholipid acyltransferase 5
Atp6v1f	-0.153133991	6.50807312	0.359850555	0.548589245	0.999827379	NS	ATPase	H+ transporting	lysosomal V1 subunit F
Clcn5	-0.846770276	3.65131438	2.473308524	0.115793954	0.999827379	NS	H(+)/Cl(-) exchange transporter 5
Clcn3	-0.005526551	7.19519805	0.000379913	0.984449125	0.999827379	NS	H(+)/Cl(-) exchange transporter 3
Pde1c	-0.929967205	3.49419489	1.259864011	0.261676833	0.999827379	NS	phosphodiesterase 1C
Utp20	0.389745418	4.17723906	0.759796676	0.38339216	0.999827379	NS	UTP20 small subunit processome component
9330159F19Rik	0.52493778	0.86157987	0.127320181	0.72122691	0.999827379	NS	RIKEN cDNA 9330159F19 gene
Cul3	0.320980186	6.7641988	0.951522447	0.329332074	0.999827379	NS	Cullin-3
Sst	0.980013386	10.12145478	1.641488794	0.200121322	0.999827379	NS	somatostatin
Ddx56	0.032685003	5.767291	0.013742118	0.906680346	0.999827379	NS	Probable ATP-dependent RNA helicase DDX56
Tmed4	0.124470544	7.9837039	0.135888653	0.712402949	0.999827379	NS	Transmembrane emp24 domain-containing protein 4
Col26a1	0.721833281	0.22569	0.213338911	0.644162893	0.999827379	NS	Mus musculus collagen	type XXVI	alpha 1 (Col26a1)	transcript variant 2	mRNA.
Bid	1.110029984	3.14963063	2.830825705	0.092470805	0.999827379	NS	BH3-interacting domain death agonist BH3-interacting domain death agonist p15 BH3-interacting domain
Ralb	-0.083185346	5.67300704	0.098106327	0.75411406	0.999827379	NS	Ras-related protein Ral-B
Ppp1cc	0.17697023	6.92060399	0.452316042	0.50123715	0.999827379	NS	Serine/threonine-protein phosphatase PP1-gamma catalytic subunit
Dnajb11	-0.093428664	7.49858355	0.091003156	0.762905704	0.999827379	NS	DnaJ homolog subfamily B member 11
Tbccd1	-0.517259077	5.01100524	1.886641952	0.169581163	0.999827379	NS	TBCC domain-containing protein 1
Clec11a	-0.008751959	2.49664881	0.000128381	0.990959742	0.999827379	NS	C-type lectin domain family 11 member A
Zfp324	-0.537230221	4.60633088	1.738891751	0.18727931	0.999827379	NS	zinc finger protein 324
Coro1c	0.094586407	7.0258146	0.10820388	0.742198332	0.999827379	NS	Coronin-1C
Tax1bp1	0.015701037	8.07430471	0.001901843	0.965215181	0.999827379	NS	Tax1-binding
Ndrg2	0.753880057	3.13525406	0.84620777	0.35762736	0.999827379	NS	Protein NDRG2 Protein NDRG2	N-terminally processed
Mettl17	-0.517203993	3.2222986	0.664426687	0.415001492	0.999827379	NS	Methyltransferase-like protein 17	mitochondrial
Arhgef40	-1.754390505	1.75989803	2.566687862	0.10913602	0.999827379	NS	Rho guanine nucleotide exchange factor 40
Pnpla6	-0.05816041	4.48763509	0.021030356	0.884696292	0.999827379	NS	Mus musculus patatin-like phospholipase domain containing 6 (Pnpla6)	transcript variant 4	mRNA.
Mcoln1	-0.453643394	4.9211134	1.592877858	0.20691545	0.999827379	NS	Mucolipin-1
Arhgef18	-0.320962877	5.21233762	1.060253786	0.303157309	0.999827379	NS	Rho guanine nucleotide exchange factor 18
Pkn2	0.253427567	6.45629942	0.997201587	0.317988591	0.999827379	NS	Serine/threonine-protein kinase N2
Etfb	-0.117372952	6.35244361	0.212804715	0.644577922	0.999827379	NS	Electron transfer flavoprotein subunit beta
Stxbp2	-0.086246777	6.16318464	0.103177819	0.748048948	0.999827379	NS	syntaxin binding protein 2
Sgce	0.555987588	3.66148897	0.905900613	0.341204451	0.999827379	NS	Epsilon-sarcoglycan
Wwox	0.001336929	4.02955412	8.32E-06	0.997698311	0.999827379	NS	WW domain-containing oxidoreductase
Slbp	0.16898416	5.91878674	0.32209576	0.570350883	0.999827379	NS	stem-loop binding protein
Arid3b	0.171295659	4.17957395	0.091368716	0.762444275	0.999827379	NS	AT-rich interactive domain-containing protein 3B
Cnn2	-0.443657152	3.36367779	0.260024008	0.610103662	0.999827379	NS	Calponin-2
Polr2e	0.364235752	5.73591757	2.025452358	0.154682857	0.999827379	NS	polymerase (RNA) II (DNA directed) polypeptide E
Myo9b	-0.142134341	4.07643451	0.100569169	0.751147676	0.999827379	NS	myosin IXB
Hdac9	-0.289499807	2.28231375	0.113697743	0.735972953	0.999827379	NS	histone deacetylase 9
Adgre1	1.139002681	1.22381445	0.821226947	0.364821679	0.999827379	NS	Mus musculus adhesion G protein-coupled receptor E1 (Adgre1)	transcript variant 2	mRNA.
Mtfp1	0.313181368	4.20325377	0.44670735	0.503902743	0.999827379	NS	Mitochondrial fission process protein 1
Rab23	0.155982513	4.76663927	0.19388551	0.659702227	0.999827379	NS	RAB23	member RAS oncogene family
Rab11a	-0.01289968	7.75406451	0.001553394	0.968561023	0.999827379	NS	RAB11A	member RAS oncogene family
Eif2b2	0.297322805	5.69188882	1.258773819	0.261883318	0.999827379	NS	Translation initiation factor eIF-2B subunit beta
Dlst	-0.128011665	6.79177739	0.246539318	0.619522461	0.999827379	NS	Dihydrolipoyllysine-residue succinyltransferase component of 2-oxoglutarate dehydrogenase complex	m
Ulk2	-0.102803416	5.74413504	0.144169441	0.70417071	0.999827379	NS	unc-51 like kinase 2
Dgkq	0.255197773	3.5021741	0.186721533	0.665659381	0.999827379	NS	Diacylglycerol kinase theta
Chmp2b	-0.017310883	5.6223576	0.003955311	0.949853091	0.999827379	NS	Charged multivesicular body protein 2b
Plod3	0.371229455	4.45538318	0.888549988	0.34587055	0.999827379	NS	Procollagen-lysine	2-oxoglutarate 5-dioxygenase 3
Ap1s1	-0.045060223	6.31055542	0.031690841	0.858707885	0.999827379	NS	AP-1 complex subunit sigma-1A
Mapk13	0.652296642	1.85787066	0.416117184	0.51888088	0.999827379	NS	Mitogen-activated protein kinase 13
Srpk1	0.037413507	4.81780532	0.011433763	0.914845483	0.999827379	NS	SRSF protein kinase 1
Lbr	-0.188293464	5.87249686	0.415563042	0.519159345	0.999827379	NS	Lamin-B receptor
Prcc	-0.315195085	3.10115508	0.230808272	0.630925154	0.999827379	NS	papillary renal cell carcinoma (translocation-associated)
Rrnad1	0.048906458	3.35466089	0.007058717	0.933043573	0.999827379	NS	ribosomal RNA adenine dimethylase domain containing 1
Hdgf	-0.073552374	7.30263179	0.062933069	0.801918761	0.999827379	NS	Hepatoma-derived growth factor
Thop1	0.234457539	4.60039411	0.373235514	0.541245897	0.999827379	NS	thimet oligopeptidase 1
Apba3	0.160042204	3.9640779	0.115449033	0.734023779	0.999827379	NS	Amyloid-beta A4 protein-binding family A member 3
Matk	0.525285367	1.33181225	0.21370009	0.643882641	0.999827379	NS	megakaryocyte-associated tyrosine kinase
Pias4	-0.114557183	4.61278719	0.085229751	0.770331469	0.999827379	NS	protein inhibitor of activated STAT 4
Map2k1	-0.078662849	6.21335582	0.0858894	0.769469462	0.999827379	NS	Dual specificity mitogen-activated protein kinase kinase 1
Sgta	0.027465923	6.69927878	0.010606136	0.917974007	0.999827379	NS	small glutamine-rich tetratricopeptide repeat (TPR)-containing	alpha
Tmem242	0.220865356	3.91229362	0.158911326	0.690160817	0.999827379	NS	Transmembrane protein 242
Dtx2	0.007685019	3.26692177	0.000164777	0.989758209	0.999827379	NS	Probable E3 ubiquitin-protein ligase DTX2
Hspb1	0.171461255	1.40065514	0.019186547	0.889833012	0.999827379	NS	Heat shock protein beta-1
Rasa4	0.619918537	1.35743118	0.245298507	0.620405174	0.999827379	NS	RAS p21 protein activator 4
Syt5	-0.272273207	5.07131712	0.666850447	0.414151844	0.999827379	NS	Synaptotagmin-5
Hnrnpa2b1	-0.042654518	8.90779997	0.007093578	0.93287883	0.999827379	NS	Heteroous nuclear ribonucleoproteins A2/B1
Ccdc130	0.386489051	4.26329689	0.82625887	0.363356551	0.999827379	NS	Coiled-coil domain-containing protein 130
Mri1	-0.443052305	3.17550811	0.500354692	0.479344315	0.999827379	NS	Methylthioribose-1-phosphate isomerase
Prkacb	-0.414165801	9.11200287	0.568641499	0.450799254	0.999827379	NS	protein kinase	cAMP dependent	catalytic	beta
Sgsh	-0.342898941	3.22345516	0.290746528	0.589742534	0.999827379	NS	N-sulfoglucosamine sulfohydrolase (sulfamidase)
Chd5	1.016007183	1.76962994	0.910828499	0.339894689	0.999827379	NS	Chromodomain-helicase-DNA-binding protein 5
Cstb	0.163643943	4.98499038	0.204860794	0.650825633	0.999827379	NS	Cystatin-B
Pex5	-0.319680909	5.46057263	1.227181036	0.267955961	0.999827379	NS	Peroxisomal targeting signal 1 receptor
Jkamp	0.105612326	4.89223019	0.084126376	0.77178145	0.999827379	NS	JNK1/MAPK8-associated membrane protein
Cd44	0.501162455	5.55074945	2.817122702	0.09326345	0.999827379	NS	CD44 molecule (Indian blood group)
Eif2ak4	0.23107214	4.59825939	0.332433752	0.564229509	0.999827379	NS	eIF-2-alpha kinase GCN2
Wdr1	0.119075397	7.67808126	0.132923185	0.715420228	0.999827379	NS	WD repeat domain 1
Slc2a9	0.288556663	1.09164093	0.04957242	0.823808972	0.999827379	NS	solute carrier family 2 (facilitated glucose transporter)	member 9
Wisp1	-0.04731179	0.49988795	0.000640608	0.979807518	0.999827379	NS	WNT1 inducible signaling pathway protein 1
Ndrg1	0.328996315	7.84497703	0.921282505	0.337138453	0.999827379	NS	Protein NDRG1
4930550C14Rik	-0.041176012	3.60668205	0.005903587	0.938754961	0.999827379	NS	Uncharacterized
Man2b1	0.066124522	6.13286738	0.056163512	0.812665773	0.999827379	NS	Lysosomal alpha-mannosidase
Wdr83	-0.183752172	3.24723674	0.069735513	0.791722262	0.999827379	NS	WD repeat domain containing 83
Prdx2	0.053450437	7.25931814	0.034177285	0.853330221	0.999827379	NS	Peroxiredoxin-2
Polr2a	0.033498049	5.87944771	0.015756271	0.900108738	0.999827379	NS	DNA-directed RNA polymerase II subunit RPB1
Senp3	-0.042433167	4.31019827	0.010021802	0.92025783	0.999827379	NS	Sentrin-specific protease 3
Plekha8	-0.114131131	4.04702112	0.060620764	0.805517474	0.999827379	NS	Pleckstrin homology domain-containing family A member 8
G6pc2	-0.339534993	10.17376652	0.223880828	0.6360987	0.999827379	NS	Glucose-6-phosphatase 2
Spc25	-0.325066571	6.21969189	0.938988065	0.332538221	0.999827379	NS	Kinetochore protein Spc25
Dnah2	-1.132917877	0.73551842	0.416497855	0.51868974	0.999827379	NS	Dynein heavy chain 2	axonemal
Ripk4	0.261792842	6.60803698	1.079353657	0.298842192	0.999827379	NS	Receptor-interacting serine/threonine-protein kinase 4
Ufd1	-0.099181817	6.5328808	0.154554379	0.694220478	0.999827379	NS	ubiquitin recognition factor in ER-associated degradation 1
Zfp287	0.102252506	3.9521844	0.041572937	0.838436002	0.999827379	NS	zinc finger protein 287
Prlr	-0.382731062	6.82412827	1.902728077	0.167773278	0.999827379	NS	prolactin receptor
Letm1	-0.206183105	6.29949294	0.604465121	0.436879434	0.999827379	NS	Mitochondrial proton/calcium exchanger protein
Ubqln1	0.000547891	7.56184442	3.24E-06	0.998563797	0.999827379	NS	ubiquilin 1
Fgfr4	0.455539034	2.61461465	0.311024137	0.577052413	0.999827379	NS	fibroblast growth factor receptor 4
Txn2	-0.114572348	5.99566649	0.178809686	0.672398179	0.999827379	NS	thioredoxin 2
Crbn	0.143876594	5.90904574	0.290726263	0.5897555	0.999827379	NS	Protein cereblon
Msh6	-0.095052132	5.47742303	0.118460315	0.730710439	0.999827379	NS	DNA mismatch repair protein Msh6
Fbxo11	0.336873061	4.06705662	0.552782716	0.457182902	0.999827379	NS	Mus musculus F-box protein 11 (Fbxo11)	transcript variant 2	mRNA.
Mlxipl	-0.156925479	8.10370375	0.191274644	0.661857853	0.999827379	NS	Carbohydrate-responsive element-binding protein
Tbl2	-0.177540613	6.77031049	0.358549911	0.549312683	0.999827379	NS	Transducin beta-like protein 2
Bud23	-0.00811566	4.8062526	0.000528671	0.981655976	0.999827379	NS	Probable 18S rRNA (guanine-N(7))-methyltransferase
Nid1	-0.654179046	5.11037971	1.046379707	0.306342349	0.999827379	NS	Nidogen-1
Mcm5	-0.473085579	4.35897443	1.186226708	0.276091997	0.999827379	NS	minichromosome maintenance complex component 5
Hmox1	0.596876492	2.01695842	0.405681957	0.52416935	0.999827379	NS	Heme oxygenase 1
Mprip	-0.027098552	7.0072854	0.009741973	0.921375332	0.999827379	NS	Myosin phosphatase Rho-interacting protein
Cic	-0.061920957	2.88512181	0.008440534	0.926799436	0.999827379	NS	capicua transcriptional repressor
Pafah1b3	0.250796323	3.77339004	0.248259402	0.618303362	0.999827379	NS	Platelet-activating factor acetylhydrolase IB subunit gamma
Prkaca	-0.017382953	7.0688233	0.004050831	0.949251995	0.999827379	NS	protein kinase	cAMP dependent	catalytic	alpha
Asf1b	-0.396730601	2.98065299	0.3389107	0.560458662	0.999827379	NS	Histone chaperone ASF1B
Ddx39	-0.332907843	4.89958875	0.803604975	0.370017722	0.999827379	NS	ATP-dependent RNA helicase DDX39A
Dnajb1	0.353354062	6.12692912	1.423473576	0.232832515	0.999827379	NS	DnaJ homolog subfamily B member 1
Kbtbd4	-0.342404018	4.98658244	0.56347537	0.452863343	0.999827379	NS	Kelch repeat and BTB domain-containing protein 4
Celf1	0.101354372	6.98228527	0.14424558	0.704096287	0.999827379	NS	CUGBP Elav-like family member 1
Ndufs3	-0.038755165	6.23202689	0.021601548	0.883152029	0.999827379	NS	NADH dehydrogenase [ubiquinone] iron-sulfur protein 3	mitochondrial
Por	-0.186226988	8.11129593	0.270984323	0.602672243	0.999827379	NS	P450 (cytochrome) oxidoreductase
Igf1r	0.05969433	5.05877326	0.028950927	0.864892393	0.999827379	NS	insulin like growth factor 1 receptor
Insr	0.281651999	4.80879398	0.596099751	0.440070029	0.999827379	NS	Insulin receptor Insulin receptor subunit alpha Insulin receptor subunit beta
Atp4a	-0.272779891	2.59910797	0.128431414	0.720063978	0.999827379	NS	ATPase H+/K+ transporting alpha subunit
Trim28	0.464909845	6.38589144	3.315659184	0.068622795	0.999827379	NS	tripartite motif-containing 28
Ube2m	0.144404086	4.99157541	0.176539753	0.674363942	0.999827379	NS	ubiquitin-conjugating enzyme E2M
Adcy9	-0.219209837	3.67550035	0.163376878	0.686066347	0.999827379	NS	Adenylate cyclase type 9
Mef2c	0.652935626	2.76489852	0.749201012	0.386729313	0.999827379	NS	Mus musculus myocyte enhancer factor 2C (Mef2c)	transcript variant 14	mRNA.
Ctr9	0.180380977	6.84657894	0.492906432	0.482633669	0.999827379	NS	RNA polymerase-associated
Eif4g2	-0.143300636	10.05987294	0.042642621	0.836399663	0.999827379	NS	eukaryotic translation initiation factor 4 gamma 2 isoform 2
Pcyt1a	-0.481472594	5.30963086	2.320774525	0.127656449	0.999827379	NS	Choline-phosphate cytidylyltransferase A
Zfp592	0.0807038	5.94790321	0.094203158	0.758900209	0.999827379	NS	zinc finger protein 592
Psmd4	0.134659424	6.49024462	0.289606996	0.590472486	0.999827379	NS	26S proteasome non-ATPase regulatory subunit 4
Insrr	-0.54009894	8.47518661	1.627188779	0.202092321	0.999827379	NS	Insulin receptor-related protein Insulin receptor-related protein alpha chain Insulin receptor-relat
Snx6	-0.14125733	6.62126327	0.319518352	0.571897242	0.999827379	NS	Sorting nexin-6 Sorting nexin-6	N-terminally processed
Mthfd2	-0.218278099	4.5167806	0.258451973	0.61118567	0.999827379	NS	Bifunctional methylenetetrahydrofolate dehydrogenase/cyclohydrolase	mitochondrial NAD-dependent met
Kit	0.714101149	4.32018843	2.91190117	0.087928168	0.999827379	NS	Mast/stem cell growth factor receptor Kit
Tomm40l	-0.542744266	4.35542172	1.63793281	0.200609331	0.999827379	NS	Mitochondrial import receptor subunit TOM40B
Pan2	-0.547222843	4.5208115	1.595583413	0.20653023	0.999827379	NS	PAN2-PAN3 deadenylation complex catalytic subunit Pan2
Cs	0.125108393	7.00213972	0.218328373	0.640316577	0.999827379	NS	Citrate synthase	mitochondrial
Bcas2	0.004131875	6.29294086	0.000248723	0.98741713	0.999827379	NS	breast carcinoma amplified sequence 2
Ctcf	0.232791914	6.37090707	0.818944363	0.36548899	0.999827379	NS	Mus musculus CCCTC-binding factor (Ctcf)	transcript variant 2	mRNA.
Pard6a	0.477096256	4.11437836	0.987128129	0.320445299	0.999827379	NS	Partitioning defective 6 homolog alpha
Ranbp1	0.006902772	6.48277873	0.000759066	0.978020143	0.999827379	NS	Ran-specific GTPase-activating protein
Rfx5	-0.783915719	4.28799593	3.349261958	0.067235152	0.999827379	NS	Mus musculus regulatory factor X	5 (influences HLA class II expression) (Rfx5)	transcript variant
Psmb4	-0.099618053	6.15036357	0.14487536	0.703481558	0.999827379	NS	Proteasome subunit beta type-4
Slc30a4	0.070202219	4.93574796	0.040407182	0.84068655	0.999827379	NS	Zinc transporter 4
Sqor	0.138650248	5.68260654	0.280166663	0.596592001	0.999827379	NS	Sulfide:quinone oxidoreductase	mitochondrial
Bloc1s6	-0.283935837	4.71217718	0.569888693	0.45030315	0.999827379	NS	Biosis of lysosome-related organelles complex 1 subunit 6
Metap1	0.054881934	5.8786855	0.037849125	0.845746411	0.999827379	NS	Methionine aminopeptidase 1
Gpr108	0.077851506	5.92497424	0.086214569	0.769045864	0.999827379	NS	G protein-coupled receptor 108
Gata6	0.068337301	4.73952909	0.026477085	0.870740624	0.999827379	NS	Transcription factor GATA-6
Rsl1d1	0.189196179	6.47370618	0.544384282	0.460621396	0.999827379	NS	Ribosomal L1 domain-containing protein 1
Apc	-0.157023979	6.13117933	0.306686219	0.579720809	0.999827379	NS	APC	WNT signaling pathway regulator
Reep5	0.322914803	6.16152623	1.431686246	0.231489439	0.999827379	NS	receptor accessory protein 5
Ergic3	0.137538798	6.90394569	0.271568131	0.602281792	0.999827379	NS	Mus musculus ERGIC and golgi 3 (Ergic3)	transcript variant 2	mRNA.
Uqcc1	-0.207903975	5.7176977	0.659218726	0.416835898	0.999827379	NS	ubiquinol-cytochrome c reductase complex assembly factor 1
Ncoa2	0.269772952	6.29751998	1.0451704	0.306622015	0.999827379	NS	Nuclear receptor coactivator 2
Nr2c2	-0.027341294	6.05917221	0.010839493	0.917079764	0.999827379	NS	nuclear receptor subfamily 2	group C	member 2
Nr2c1	-0.606419384	3.68147897	1.35215678	0.244901419	0.999827379	NS	Nuclear receptor subfamily 2 group C member 1
Smpd4	0.407122137	4.30608895	0.913384526	0.339217996	0.999827379	NS	sphingomyelin phosphodiesterase 4
Pex1	-0.330971697	4.2196843	0.601006467	0.438194271	0.999827379	NS	Peroxisome biosis factor 1
Kctd20	0.138311005	7.33594546	0.218243481	0.640381569	0.999827379	NS	Mus musculus potassium channel tetramerisation domain containing 20 (Kctd20)	transcript variant 3
Ctns	-0.343968192	4.53617151	0.651838008	0.419456309	0.999827379	NS	Mus musculus cystinosis	nephropathic (Ctns)	transcript variant 2	mRNA.
Shpk	-1.148752423	3.70972449	4.055383096	0.044030727	0.999827379	NS	Sedoheptulokinase
Ephb3	-2.509765765	1.49251267	2.530023732	0.111698536	0.999827379	NS	Ephrin type-B receptor 3
Tuft1	0.208856323	5.67236003	0.485613988	0.485890355	0.999827379	NS	tuftelin 1
Rcn1	0.484354965	5.08607752	2.251331126	0.133499522	0.999827379	NS	Reticulocalbin-1
Dnase1	-1.432745415	0.01847113	0.534889198	0.464558561	0.999827379	NS	Mus musculus deoxyribonuclease I (Dnase1)	transcript variant 2	mRNA.
Trap1	-0.218116786	5.74809587	0.632722443	0.426358459	0.999827379	NS	Heat shock protein 75 kDa	mitochondrial
Naa60	-0.361262545	6.63800173	1.440331237	0.230085747	0.999827379	NS	N-alpha-acetyltransferase 60
1700037C18Rik	0.371877027	2.67890993	0.252064491	0.615625142	0.999827379	NS	RIKEN cDNA 1700037C18 gene
Ankrd13d	-0.360944127	3.00888157	0.294576236	0.587302785	0.999827379	NS	Ankyrin repeat domain-containing protein 13D
Tpr	0.273397391	6.90558942	1.03995302	0.307832398	0.999827379	NS	translocated promoter region	nuclear basket protein
BC003331	-0.256216108	5.23886504	0.528456546	0.467256483	0.999827379	NS	odr-4 GPCR localization factor homolog
Dhx34	0.130778419	4.9337682	0.140982162	0.707306556	0.999827379	NS	DExH-box helicase 34
Kptn	-0.176473104	2.67174393	0.047734229	0.827053858	0.999827379	NS	kaptin	actin binding protein
Napa	0.005884865	8.58435267	0.00017764	0.989365978	0.999827379	NS	Alpha-soluble NSF attachment protein
Sra1	-0.025899514	6.15939946	0.009651283	0.921740973	0.999827379	NS	Mus musculus amyloid beta (A4) protein-binding	family B	member 3 (Apbb3)	transcript variant 2	mR
Atp5g1	0.090877186	6.88982769	0.121339851	0.727585832	0.999827379	NS	ATP synthase F(0) complex subunit C1	mitochondrial
Snf8	-0.084799661	4.62114884	0.053978731	0.816279202	0.999827379	NS	Mus musculus SNF8	ESCRT-II complex subunit	homolog (S. cerevisiae) (Snf8)	transcript variant 2	m
Tbcb	-0.094131875	5.63043807	0.122004144	0.726870918	0.999827379	NS	Tubulin-folding cofactor B
Inpp5k	0.25563564	5.61557813	0.896749044	0.34365491	0.999827379	NS	inositol polyphosphate 5-phosphatase K
Crkl	0.600647506	5.55117815	4.729110036	0.029656227	0.999827379	NS	Crk-like protein
Eps8l1	1.439121349	2.58622236	3.231476407	0.072235538	0.999827379	NS	Epidermal growth factor receptor kinase substrate 8-like protein 1
Clint1	-0.143498507	7.12743202	0.274581374	0.600274973	0.999827379	NS	Mus musculus clathrin interactor 1 (Clint1)	transcript variant 2	mRNA.
Cdkal1	0.073123557	4.74053427	0.037567956	0.846313265	0.999827379	NS	Threonylcarbamoyladenosine tRNA methylthiotransferase
Htra1	-0.173008327	2.202369	0.014165844	0.905259234	0.999827379	NS	Serine protease HTRA1
Zbtb17	0.605001191	4.66126437	2.417524611	0.119984396	0.999827379	NS	zinc finger and BTB domain containing 17
Fblim1	-2.210731034	1.13040881	2.99101369	0.083727741	0.999827379	NS	Filamin-binding LIM protein 1
Ccdc159	-0.209596664	1.89657258	0.045043608	0.831923863	0.999827379	NS	Coiled-coil domain-containing protein 159
Mob1b	0.543462478	4.62821966	1.959043897	0.161615609	0.999827379	NS	MOB kinase activator 1B
Atp6v1b2	-0.281579279	8.68863408	0.365387592	0.545529223	0.999827379	NS	V-type proton ATPase subunit B	brain isoform
Eps15l1	0.22931091	5.07997795	0.491164372	0.483408364	0.999827379	NS	Epidermal growth factor receptor substrate 15-like 1
Tep1	0.441290956	3.70064106	0.652924051	0.419069191	0.999827379	NS	Telomerase protein component 1
Ttc5	-0.619215671	5.31390455	4.216558636	0.040031273	0.999827379	NS	tetratricopeptide repeat domain 5
Osgep	-0.159673229	4.7151157	0.193914505	0.659678384	0.999827379	NS	O-sialoglycoprotein endopeptidase
Aamp	-0.123401828	7.31734184	0.170337757	0.679811807	0.999827379	NS	angio-associated migratory protein
Tmbim1	0.103399179	5.99682256	0.160841529	0.68838292	0.999827379	NS	transmembrane BAX inhibitor motif containing 1
Arpc2	0.10004731	7.67547941	0.101231923	0.750356257	0.999827379	NS	Mus musculus actin related protein 2/3 complex	subunit 2 (Arpc2)	transcript variant 2	mRNA.
Kmt2b	0.295757077	2.99559646	0.204291117	0.651279249	0.999827379	NS	Histone-lysine N-methyltransferase 2B
Tmem147	-0.249272779	5.21829276	0.63982511	0.423774135	0.999827379	NS	transmembrane protein 147
Rps9	0.286642575	6.55394737	1.189760666	0.275377838	0.999827379	NS	40S ribosomal protein S9
Tfpt	0.021715138	3.16964865	0.001190062	0.97248061	0.999827379	NS	TCF3 fusion partner homolog
Susd2	-0.968941857	2.18515822	0.816346366	0.366250573	0.999827379	NS	Sushi domain-containing protein 2
Crip2	-0.052160956	3.35891723	0.006588897	0.935305151	0.999827379	NS	Cysteine-rich protein 2
Crip1	0.450193833	4.22682321	0.577958036	0.44711382	0.999827379	NS	Cysteine-rich protein 1
Cbfa2t3	-0.129477097	5.52883682	0.183553313	0.668337196	0.999827379	NS	Protein CBFA2T3
Fbln1	-1.049583143	3.1533662	2.029503141	0.154271035	0.999827379	NS	Mus musculus fibulin 1 (Fbln1)	transcript variant 2	mRNA.
Pgrmc1	0.144031097	7.76996693	0.186242935	0.666062161	0.999827379	NS	progesterone receptor membrane component 1
Gcat	0.01643981	5.52336361	0.003483103	0.952937918	0.999827379	NS	2-amino-3-ketobutyrate coenzyme A ligase	mitochondrial
Elovl1	-0.449165755	4.75306956	1.581613597	0.208528421	0.999827379	NS	Elongation of very long chain fatty acids protein 1
Med8	-0.061862077	4.65214297	0.029797224	0.862951134	0.999827379	NS	mediator complex subunit 8
Hyi	-0.040424544	3.8296102	0.006512633	0.935679834	0.999827379	NS	hydroxypyruvate isomerase (putative)
Cdc20	-1.268661336	3.26282016	2.919769948	0.087500338	0.999827379	NS	Cell division cycle
Adamts4	-1.165058273	0.53281934	0.405560488	0.524231471	0.999827379	NS	A disintegrin and metalloproteinase with thrombospondin motifs 4
Nectin4	-0.837640265	1.96847052	0.739259405	0.389898221	0.999827379	NS	Nectin-4
Pfdn2	-0.086448859	5.53671252	0.100951843	0.750690362	0.999827379	NS	Prefoldin subunit 2
Rnf114	-0.008800001	6.295968	0.000671352	0.979328761	0.999827379	NS	E3 ubiquitin-protein ligase RNF114
C330007P06Rik	0.148259948	5.42601077	0.235332927	0.627597431	0.999827379	NS	UPF0428
Neurl1a	-0.157002783	5.60124096	0.32240203	0.570167676	0.999827379	NS	E3 ubiquitin-protein ligase NEURL1
Srm	-0.125137606	5.85455305	0.170644455	0.679539694	0.999827379	NS	spermidine synthase
Rbm14	0.458011525	5.24409179	2.106958702	0.146630479	0.999827379	NS	RNA-binding protein 14
Actn3	-0.006120977	2.17086592	4.86E-05	0.994437067	0.999827379	NS	Alpha-actinin-3
Zdhhc24	-0.751301135	4.70805626	3.724953191	0.05360513	0.999827379	NS	zinc finger	DHHC domain containing 24
Bbs1	0.144339275	4.92262669	0.146946757	0.70147039	0.999827379	NS	Bardet-Biedl syndrome 1 protein homolog
Ndor1	-0.064561261	4.44323905	0.027034111	0.869400102	0.999827379	NS	NADPH-dependent diflavin oxidoreductase 1
Nsmf	-0.409893545	5.35651267	1.860772914	0.172535621	0.999827379	NS	NMDA receptor synaptonuclear signaling and neuronal migration factor
Pdk1	-0.207379866	5.28768054	0.322721185	0.569976883	0.999827379	NS	[Pyruvate dehydrogenase (acetyl-transferring)] kinase isozyme 1	mitochondrial
Ptbp1	-0.027743727	7.63200497	0.008053027	0.928494894	0.999827379	NS	polypyrimidine tract binding protein 1
Mvd	0.215711908	3.45186709	0.130721152	0.717685492	0.999827379	NS	mevalonate (diphospho) decarboxylase
Cyba	0.8141876	1.54591266	0.498316298	0.480240862	0.999827379	NS	Cytochrome b-245 light chain
Tmem110	0.00361419	3.16220217	2.95E-05	0.995663725	0.999827379	NS	Store-operated calcium entry regulator STIMATE
Sfmbt1	0.236679278	5.37305997	0.602100225	0.437777815	0.999827379	NS	Scm-like with four MBT domains protein 1
Itih1	-0.871255777	3.77803048	2.863296694	0.090621598	0.999827379	NS	Inter-alpha-trypsin inhibitor heavy chain H1
Cryba2	-0.466070222	4.60822908	1.167184085	0.279980592	0.999827379	NS	Beta-crystallin A2
Rundc3a	-0.16712263	7.08085234	0.367596496	0.544317307	0.999827379	NS	RUN domain-containing protein 3A
Slc4a3	-0.787984179	4.10807952	2.066094699	0.150606746	0.999827379	NS	solute carrier family 4 (anion exchanger)	member 3
Cdt1	-0.071038282	2.33995885	0.005481863	0.940978871	0.999827379	NS	DNA replication factor Cdt1
Runx1t1	-0.111112395	6.26912767	0.173005679	0.677454264	0.999827379	NS	runt-related transcription factor 1
Aprt	-0.243254874	4.01060073	0.267878686	0.60475833	0.999827379	NS	Adenine phosphoribosyltransferase
Gtf2h1	0.385484143	5.40424664	1.832248799	0.175862159	0.999827379	NS	general transcription factor IIH subunit 1
Hfe	-0.212845747	3.79995034	0.173488368	0.677030011	0.999827379	NS	Hereditary hemochromatosis protein homolog
Abhd1	0.70597152	0.4914043	0.240360181	0.623946094	0.999827379	NS	abhydrolase domain containing 1
Slc5a6	0.052376789	4.05216533	0.01304186	0.909078487	0.999827379	NS	Sodium-dependent multivitamin transporter
Aplp1	0.136217942	10.26339124	0.034954406	0.851691231	0.999827379	NS	amyloid beta precursor like protein 1
Qrich1	-0.109118295	7.69993348	0.118916998	0.730212074	0.999827379	NS	glutamine rich 1
P4htm	0.023484784	5.1356157	0.00499704	0.943644684	0.999827379	NS	prolyl 4-hydroxylase	transmembrane (endoplasmic reticulum)
Usp19	0.066484611	7.13787038	0.058842496	0.808334865	0.999827379	NS	ubiquitin specific peptidase 19
Pola1	-0.146657986	3.65179929	0.075999753	0.782793454	0.999827379	NS	polymerase (DNA directed)	alpha 1
Cdc42	0.004485801	8.51745741	0.000106813	0.991753982	0.999827379	NS	Cell division control
Pknox1	-0.301830447	5.89648505	1.261245315	0.261415501	0.999827379	NS	Homeobox protein PKNOX1
Gmnn	-0.195577197	2.65698786	0.06891594	0.792921759	0.999827379	NS	geminin
Acot13	-0.055903692	4.9028659	0.025028602	0.874295812	0.999827379	NS	acyl-CoA thioesterase 13
Zfp184	1.159261452	3.26008181	2.695731746	0.100617286	0.999827379	NS	zinc finger protein 184 (Kruppel-like)
Cdk4	0.062139258	7.12927475	0.051167376	0.821044262	0.999827379	NS	Cyclin-dependent kinase 4
B4galnt1	-0.173134274	1.1826505	0.011134538	0.915962948	0.999827379	NS	Beta-1	4 N-acetylgalactosaminyltransferase 1
Mettl1	0.096701454	4.26586718	0.045400834	0.831268687	0.999827379	NS	tRNA (guanine-N(7)-)-methyltransferase
Tspan31	-0.283052564	6.22944288	1.115468202	0.290896364	0.999827379	NS	Tetraspanin-31
Kif5b	0.01228372	8.38548515	0.000910248	0.975931222	0.999827379	NS	Kinesin-1 heavy chain
Saal1	0.137974104	3.03953729	0.044158536	0.833558933	0.999827379	NS	Protein SAAL1
Cnp	0.257134834	4.16874969	0.255459748	0.61325667	0.999827379	NS	2'	3'-cyclic-nucleotide 3'-phosphodiesterase
Ttc25	0.264201205	0.92241005	0.042733069	0.836228706	0.999827379	NS	tetratricopeptide repeat domain 25
Sulf2	-0.010950627	3.52479025	0.000365354	0.984749984	0.999827379	NS	Mus musculus sulfatase 2 (Sulf2)	transcript variant 4	mRNA.
Sod2	-0.000099452	6.86726323	1.50E-07	0.999691021	0.999827379	NS	superoxide dismutase 2	mitochondrial
Tmco6	-0.056668904	3.52216769	0.008867621	0.924975669	0.999827379	NS	Transmembrane and coiled-coil domain-containing protein 6
Stambp	0.211035525	5.74642914	0.602710815	0.437545593	0.999827379	NS	STAM-binding protein
Ezh1	0.06003334	5.82952974	0.03780872	0.845827735	0.999827379	NS	Histone-lysine N-methyltransferase EZH1
Hap1	-0.074420586	8.10686556	0.043046116	0.835638462	0.999827379	NS	Huntingtin-associated protein 1
P3h4	-0.049816774	4.9885305	0.017462188	0.894869941	0.999827379	NS	Endoplasmic reticulum protein SC65
Ctnnb1	0.224751947	8.76677424	0.2192599	0.639604417	0.999827379	NS	Catenin beta-1
Eif1b	0.425177549	5.87323918	2.424921346	0.119419236	0.999827379	NS	Eukaryotic translation initiation factor 1b
Chrd	0.683500886	2.21937958	0.589195854	0.442730246	0.999827379	NS	Mus musculus chordin (Chrd)	transcript variant 3	mRNA.
Psmd2	-0.17158806	8.3344231	0.183209376	0.668629538	0.999827379	NS	proteasome (prosome	macropain) 26S subunit	non-ATPase	2
Syngr3	-0.049428952	1.99749682	0.002191997	0.96265767	0.999827379	NS	Synaptogyrin-3
Vars	-0.061371373	6.43919463	0.05553305	0.813700769	0.999827379	NS	valyl-tRNA synthetase
Msh5	-0.227294672	0.76815418	0.029126895	0.864486372	0.999827379	NS
Abhd16a	-0.067651335	7.08595372	0.058593256	0.808733332	0.999827379	NS	abhydrolase domain containing 16A
Neu1	0.15924176	6.29889057	0.389337918	0.532647626	0.999827379	NS	neuraminidase 1
Ddah2	-0.854544008	2.30145026	0.888570314	0.345865034	0.999827379	NS	N(G)	N(G)-dimethylarginine dimethylaminohydrolase 2
Clic1	-0.0220119	6.11092044	0.007298609	0.931918036	0.999827379	NS	Chloride intracellular channel protein 1
Lsm2	0.121436565	3.12949466	0.036841044	0.847789041	0.999827379	NS	LSM2 homolog	U6 small nuclear RNA and mRNA degradation associated
Pole	-0.823119673	2.08884524	0.620191108	0.430976278	0.999827379	NS	polymerase (DNA directed)	epsilon
Atp1a2	-1.056930341	2.05359038	0.622674257	0.430055248	0.999827379	NS	Sodium/potassium-transporting ATPase subunit alpha-2
Stx1a	0.128705288	3.79884967	0.063334761	0.801300798	0.999827379	NS	syntaxin 1A (brain)
Zfp775	-0.751677546	2.75832236	1.025946559	0.311112609	0.999827379	NS	zinc finger protein 775
Scube2	0.102299625	2.79320982	0.016954645	0.896400279	0.999827379	NS	Signal peptide	CUB and EGF-like domain-containing protein 2
Mrpl49	0.24989064	4.65613448	0.483847381	0.48668476	0.999827379	NS	39S ribosomal protein L49	mitochondrial
Mark3	-0.162528317	7.32767345	0.303149113	0.581914912	0.999827379	NS	MAP/microtubule affinity-regulating kinase 3
Gatad1	0.220330838	3.41934225	0.150405604	0.69814805	0.999827379	NS	GATA zinc finger domain-containing protein 1
Pcdha11	-1.003437941	1.91400405	0.459690623	0.497768596	0.999827379	NS	protocadherin alpha 11
M6pr	-0.188184758	7.06076696	0.470304388	0.492847169	0.999827379	NS	Cation-dependent mannose-6-phosphate receptor
Lrrc8a	0.539694337	1.42461171	0.221779532	0.637687336	0.999827379	NS	Volume-regulated anion channel subunit LRRC8A
Ppp2r1a	0.167292755	8.16018986	0.202052569	0.653069148	0.999827379	NS	protein phosphatase 2	regulatory subunit A	alpha
Fance	-0.024174931	3.94076857	0.00255095	0.959718426	0.999827379	NS	Fanconi anemia group E protein isoform 2
Tinf2	-0.057549804	3.40296906	0.008750484	0.925471378	0.999827379	NS	Terf1 (TRF1)-interacting nuclear factor 2
Hapln4	-0.632073779	2.61520647	0.612450724	0.433866559	0.999827379	NS	Hyaluronan and proteoglycan link protein 4
Dus3l	-0.181784687	4.30967943	0.188663258	0.664031513	0.999827379	NS
Gtpbp3	-0.566049051	3.28195094	0.855526763	0.35499353	0.999827379	NS	tRNA modification GTPase GTPBP3	mitochondrial
Tgfbr1	-0.259441855	6.80128504	0.781228883	0.376765567	0.999827379	NS	transforming growth factor	beta receptor I
Homer1	0.118012071	2.82343867	0.028284983	0.866440573	0.999827379	NS	Homer protein homolog 1
Rad51c	0.224220203	1.7290372	0.045944236	0.830277197	0.999827379	NS	DNA repair 3
Cav1	-0.454883659	3.46221816	0.398017741	0.528114758	0.999827379	NS	Caveolin-1
Arpp19	0.158087469	6.26920658	0.357912296	0.549667985	0.999827379	NS	Mus musculus cAMP-regulated phosphoprotein 19 (Arpp19)	transcript variant 6	mRNA.
Bcl2l1	0.145371619	5.91085391	0.28453528	0.593743925	0.999827379	NS	Mus musculus BCL2-like 1 (Bcl2l1)	transcript variant 5	mRNA.
Khsrp	-0.126000287	5.06318243	0.144630346	0.703720534	0.999827379	NS	KH-type splicing regulatory protein
Ccdc124	0.119833559	4.72156374	0.107007357	0.743577284	0.999827379	NS	Coiled-coil domain-containing protein 124
Cct4	0.279531017	6.99320409	1.011147092	0.314628188	0.999827379	NS	chaperonin containing Tcp1	subunit 4 (delta)
0610009B22Rik	-0.094258145	5.30382735	0.090091813	0.764060467	0.999827379	NS	RIKEN cDNA 0610009B22 gene
Cpt1c	-0.250335113	4.2434195	0.317528666	0.573096625	0.999827379	NS	Mus musculus carnitine palmitoyltransferase 1c (Cpt1c)	transcript variant 3	mRNA.
Zfp655	-0.303541659	5.60501936	1.285455209	0.25688719	0.999827379	NS	zinc finger protein 655
Rhoa	-0.218694456	7.95222925	0.429004701	0.512477731	0.999827379	NS	ras homolog family member A
Zmiz1	-0.168615118	6.98204779	0.394030946	0.530188139	0.999827379	NS	zinc finger	MIZ-type containing 1
Ankrd26	-0.337933366	3.73390314	0.427443542	0.513246037	0.999827379	NS
Aldh16a1	-0.198774458	3.19690113	0.101333419	0.750235309	0.999827379	NS	aldehyde dehydrogenase 16 family	member A1
Hnrnpa0	0.023051043	2.49693146	0.000903091	0.976025999	0.999827379	NS	Heteroous nuclear ribonucleoprotein A0
Prrg2	0.117547587	5.00226069	0.117333412	0.73194481	0.999827379	NS	proline-rich Gla (G-carboxyglutamic acid) polypeptide 2
Hnrnph1	-0.006692538	6.88519633	0.000597604	0.980496909	0.999827379	NS	Mus musculus heteroous nuclear ribonucleoprotein H1 (Hnrnph1)	transcript variant 1	mRNA.
Ift43	0.20915125	2.17882917	0.055068314	0.814467677	0.999827379	NS	Intraflagellar transport
Id3	-0.47051642	2.81942784	0.277603354	0.598276383	0.999827379	NS	DNA-binding protein inhibitor ID-3
Arid1a	0.346520526	5.63754891	1.465136587	0.226114601	0.999827379	NS	AT-rich interactive domain-containing protein 1A
Ctsd	0.056856678	8.19179788	0.022940074	0.879613013	0.999827379	NS	cathepsin D
Rplp1	0.060394121	5.41984324	0.042521076	0.836629696	0.999827379	NS	ribosomal protein	large	P1
Hmgcll1	-0.585745558	4.5646986	2.248844355	0.133714228	0.999827379	NS	3-hydroxymethyl-3-methylglutaryl-CoA lyase	cytoplasmic
Abhd8	0.099804189	5.86475135	0.126363712	0.722232468	0.999827379	NS	abhydrolase domain containing 8
Ift22	0.421988987	4.70080976	1.277177522	0.258424488	0.999827379	NS	Intraflagellar transport
Fzd3	-0.156941354	4.6825364	0.179607996	0.671710339	0.999827379	NS	Frizzled-3
Mid1ip1	0.389091876	6.9212511	2.153408298	0.142253793	0.999827379	NS	Mid1 interacting protein 1 (gastrulation specific G12-like (zebrafish))
Ap2s1	0.104862768	5.45596044	0.142709202	0.705602417	0.999827379	NS	AP-2 complex subunit sigma
Fgfrl1	0.465342736	1.0733031	0.13777454	0.710503521	0.999827379	NS	Fibroblast growth factor receptor-like 1
Fhl2	0.361285907	4.02277157	0.622629133	0.430071958	0.999827379	NS	Four and a half LIM domains protein 2
Emc10	-0.152973643	6.17281956	0.338008443	0.560981048	0.999827379	NS	ER membrane protein complex subunit 10 isoform 2
Clstn3	0.097630601	3.95855546	0.036617084	0.848246762	0.999827379	NS	Mus musculus calsyntenin 3 (Clstn3)	transcript variant 2	mRNA.
Fbxw9	0.054300208	4.40950258	0.014078873	0.905549143	0.999827379	NS	F-box and WD repeat domain containing 9
Fnbp4	0.115324369	5.07162944	0.095744647	0.756997252	0.999827379	NS	formin binding protein 4
Cers4	-0.285942268	2.28432635	0.101332972	0.750235841	0.999827379	NS	Ceramide synthase 4
Scrn3	0.014984487	5.66601702	0.002314469	0.961629434	0.999827379	NS	secernin 3
Phax	0.132042433	5.52193016	0.22092888	0.638333068	0.999827379	NS	phosphorylated adaptor for RNA export
Tle1	0.281324698	6.02385226	1.004098665	0.316320779	0.999827379	NS	Transducin-like enhancer protein 1
Relt	0.281346702	6.32745898	1.017158408	0.313193992	0.999827379	NS	RELT tumor necrosis factor receptor
Snrpb2	-0.03035713	3.99664843	0.004051845	0.949245648	0.999827379	NS	U2 small nuclear ribonucleoprotein B''
Ubc	0.456379014	10.98517798	0.273954671	0.600691198	0.999827379	NS	ubiquitin C
Prpf31	-0.192385631	4.6433442	0.265194967	0.606573396	0.999827379	NS	U4/U6 small nuclear ribonucleoprotein Prp31
Sertad1	0.828979228	5.40673701	4.790869612	0.028610978	0.999827379	NS	SERTA domain-containing protein 1
Carhsp1	0.018658495	6.48706169	0.004120834	0.948815978	0.999827379	NS	Calcium-regulated heat stable protein 1
Elk3	0.1764037	4.53570826	0.189161121	0.663615728	0.999827379	NS	ETS domain-containing protein Elk-3
Herpud2	0.123101477	6.1817245	0.219958579	0.639071481	0.999827379	NS	Homocysteine-responsive endoplasmic reticulum-resident ubiquitin-like domain member 2 protein
Rdh13	0.576747809	3.19803812	0.720818582	0.395875531	0.999827379	NS	Retinol dehydrogenase 13
Nutf2	-0.069167256	5.62483171	0.069378423	0.792243954	0.999827379	NS	Nuclear transport factor 2
Arpc5	-0.066116241	8.34153816	0.026646432	0.870331562	0.999827379	NS	Actin-related protein 2/3 complex subunit 5
Elavl2	0.484309564	-0.01392509	0.087383401	0.767530353	0.999827379	NS	Mus musculus ELAV like RNA binding protein 1 (Elavl2)	transcript variant 5	mRNA.
Mgst1	-0.113161975	1.70241868	0.009577693	0.922038946	0.999827379	NS	Microsomal glutathione S-transferase 1
Nfib	-0.223192605	2.78801911	0.068384246	0.793704008	0.999827379	NS	nuclear factor I/B
Rab25	-0.017492975	4.80505733	0.002490352	0.960199345	0.999827379	NS	RAB25	member RAS oncogene family
Ubqln4	-0.026197165	4.90235962	0.005622086	0.940230173	0.999827379	NS	ubiquilin 4
Rps18	0.515853452	6.18638256	3.418127577	0.064484114	0.999827379	NS	ribosomal protein S18
Rpl10	0.295855186	7.75257143	0.826922254	0.363164004	0.999827379	NS	ribosomal protein L10
Rps15a	0.260276355	4.31135496	0.361479204	0.547685869	0.999827379	NS	40S ribosomal protein S15a
Ncaph2	-0.001804203	6.23251029	3.90E-05	0.995016359	0.999827379	NS	non-SMC condensin II complex	subunit H2
Hipk1	0.133566267	5.43665897	0.179843314	0.671507928	0.999827379	NS	Homeodomain-interacting protein kinase 1
Man1a2	-0.006636974	5.8172148	0.00061765	0.980172567	0.999827379	NS	Mannosyl-oligosaccharide 1	2-alpha-mannosidase IB
Acyp1	-0.195190755	3.45097593	0.115910813	0.733512572	0.999827379	NS	Acylphosphatase-1
Hdac5	-0.126892793	6.05412824	0.224399094	0.63570828	0.999827379	NS	histone deacetylase 5 isoform 4
Rala	-0.047060687	5.80072194	0.026624346	0.870384836	0.999827379	NS	Ras-related protein Ral-A
Vdac3	0.011951963	6.82869979	0.002012664	0.96421673	0.999827379	NS	voltage-dependent anion channel 3
Vps72	0.158708182	5.3824842	0.28966414	0.590435838	0.999827379	NS	vacuolar protein sorting 72
Gabpa	0.266551068	4.84104355	0.436914988	0.50861523	0.999827379	NS	GA-binding protein alpha chain
Dynll1	0.488927695	6.50456557	3.556083033	0.05932758	0.999827379	NS	Dynein light chain 1	cytoplasmic
Pdcl	-0.391238831	6.05678012	1.858216777	0.172830751	0.999827379	NS	Phosducin-like protein
Tmem184b	-0.28686934	7.11444242	1.036216632	0.308703019	0.999827379	NS	Transmembrane protein 184B
Nf2	-0.422472944	7.17408303	2.151722836	0.14241001	0.999827379	NS	Merlin
Cabp7	-0.355247958	7.66906822	1.252653061	0.263046361	0.999827379	NS	Calcium-binding protein 7
Zmat5	0.073103158	2.80663151	0.010304552	0.919144555	0.999827379	NS	zinc finger	matrin type 5
Ewsr1	-0.118361814	8.54556588	0.07370035	0.786023354	0.999827379	NS	RNA-binding protein EWS
Ap1b1	-0.292991875	8.03150022	0.717685263	0.396904236	0.999827379	NS	Mus musculus adaptor protein complex AP-1	beta 1 subunit (Ap1b1)	transcript variant 4	mRNA.
Derl3	0.244706233	3.95505567	0.249630488	0.617335383	0.999827379	NS	Mus musculus Der1-like domain family	member 3 (Derl3)	transcript variant 2	mRNA.
Gnat2	-0.163471524	3.88739008	0.107644926	0.74284145	0.999827379	NS	guanine nucleotide binding protein	alpha transducing 2
Bcl2l13	-0.461883268	5.80280345	2.877123359	0.089846397	0.999827379	NS	Bcl-2-like protein 13
Lnpk	0.413622988	4.02586549	0.790834668	0.37384786	0.999827379	NS	lunapark	ER junction formation factor
Prr29	0.466928217	3.38081291	0.55069715	0.458032979	0.999827379	NS	Proline-rich protein 29
Trpm5	-0.191340003	6.47878354	0.553113773	0.457048192	0.999827379	NS	Transient receptor potential cation channel subfamily M member 5
Rarres2	0.01279839	1.23541861	5.94E-05	0.993849504	0.999827379	NS	retinoic acid receptor responder (tazarotene induced) 2
Pttg1ip	-0.044933134	7.61113829	0.021207486	0.884215141	0.999827379	NS	pituitary tumor-transforming 1 interacting protein
Trpm2	-0.578223733	3.39766482	1.00936601	0.315054771	0.999827379	NS	Transient receptor potential cation channel subfamily M member 2
Ube2g2	-0.069888867	6.37336763	0.067438535	0.795103444	0.999827379	NS	ubiquitin-conjugating enzyme E2G 2
Met	-0.234319649	5.1237236	0.487600672	0.484999546	0.999827379	NS	MET proto-oncogene	receptor tyrosine kinase
Slc16a12	0.033106266	7.97367883	0.009625099	0.92184686	0.999827379	NS	solute carrier family 16 (monocarboxylic acid transporters)	member 12
Syn2	-0.544445764	5.93630635	4.098615877	0.042918335	0.999827379	NS	Synapsin-2
Elk1	-0.441426539	3.48672241	0.533912042	0.464966783	0.999827379	NS	ETS domain-containing protein Elk-1
Nav1	0.144837672	7.05587209	0.256715201	0.61238589	0.999827379	NS	Neuron navigator 1
Tnpo1	-0.078318123	6.1012407	0.083987595	0.771964555	0.999827379	NS	transportin 1
Rnmt	-0.110650126	5.114893	0.107335431	0.743198345	0.999827379	NS	RNA (guanine-7-) methyltransferase
Kcnq1	0.866119874	4.48068745	3.574391136	0.058676956	0.999827379	NS	Potassium voltage-gated channel subfamily KQT member 1
Srp14	-0.046715457	6.52919107	0.034401279	0.852855845	0.999827379	NS	Signal recognition particle 14 kDa protein
Cdk9	-0.093204235	5.99176786	0.129542157	0.718907219	0.999827379	NS	Cyclin-dependent kinase 9
Tor2a	-0.144989596	5.4660988	0.261722845	0.608939	0.999827379	NS	Torsin-2A
Fpgs	0.075412395	4.26109996	0.028614522	0.865672148	0.999827379	NS	Folylpolyglutamate synthase	mitochondrial
Mkl2	0.02454782	4.38735659	0.003594345	0.952193181	0.999827379	NS	MKL1/myocardin like 2
Cbx5	-0.048560964	5.05867884	0.018597272	0.891527355	0.999827379	NS	Mus musculus chromobox 5 (Cbx5)	transcript variant 4	mRNA.
Apobec3	0.239680217	3.66327316	0.153974128	0.694766105	0.999827379	NS	apolipoprotein B mRNA editing enzyme	catalytic polypeptide 3
Sardh	1.816177849	1.88861638	3.232836616	0.07217557	0.999827379	NS	sarcosine dehydrogenase
Vav2	0.499766522	2.92424915	0.506288387	0.476750014	0.999827379	NS	vav 2 oncogene
Ppp2cb	0.146078523	5.20404994	0.206664023	0.649394769	0.999827379	NS	Serine/threonine-protein phosphatase 2A catalytic subunit beta isoform
Dmap1	0.218503733	4.81010586	0.387052939	0.533852584	0.999827379	NS	DNA methyltransferase 1-associated protein 1
Mcu	0.456736869	4.3182887	1.02138458	0.312190808	0.999827379	NS	Calcium uniporter protein	mitochondrial
Tex11	-0.151057442	0.1086156	0.005980028	0.938360517	0.999827379	NS	Testis-expressed protein 11
Bcr	0.20456659	4.19935874	0.229000928	0.632265617	0.999827379	NS	Breakpoint cluster region protein
Fxyd5	0.726490406	0.74955144	0.286674914	0.592359246	0.999827379	NS	FXYD domain-containing ion transport regulator 5
Kcnd1	-0.376173356	3.62326133	0.493539437	0.482352677	0.999827379	NS	Potassium voltage-gated channel subfamily D member 1
Tfcp2	-0.352760766	3.88842981	0.37895467	0.538163211	0.999827379	NS	Mus musculus transcription factor CP2 (Tfcp2)	transcript variant 3	mRNA.
Pou6f2	0.965121133	0.46055505	0.45122765	0.501752539	0.999827379	NS	POU domain	class 6	transcription factor 2
Pou6f1	-0.286422112	2.71410537	0.120866136	0.728096987	0.999827379	NS	POU domain	class 6	transcription factor 1
Ubp1	-0.23910392	5.18244625	0.575213408	0.448194652	0.999827379	NS	upstream binding protein 1
Nuak2	-0.111397335	5.74849325	0.167516395	0.682328564	0.999827379	NS	NUAK family SNF1-like kinase 2
Ick	-0.006582627	2.49868391	6.97E-05	0.993338601	0.999827379	NS	Serine/threonine-protein kinase ICK
Sdhb	-0.103937821	6.62786687	0.173888034	0.676679255	0.999827379	NS	Mus musculus succinate dehydrogenase complex	subunit B	iron sulfur (Ip) (Sdhb)	transcript variant
Snap47	0.123366913	7.20913237	0.185042423	0.667075201	0.999827379	NS	Mus musculus synaptosomal-associated protein	47 (Snap47)	transcript variant 1	mRNA.
Kdsr	0.252469861	4.14691445	0.284936589	0.593483706	0.999827379	NS	3-ketodihydrosphingosine reductase
Vps4b	-0.00582786	7.09381024	0.000433214	0.983394195	0.999827379	NS	vacuolar protein sorting 4B
Rps25	0.509347688	6.5268487	3.374019277	0.066231988	0.999827379	NS	ribosomal protein S25
Taz	-0.412019325	5.47349465	1.741463099	0.186953549	0.999827379	NS	tafazzin
Kif19a	-0.081072908	3.69819291	0.024368753	0.875950302	0.999827379	NS	Kinesin-like protein KIF19
Aldh3a2	-0.194318074	6.45531134	0.465439761	0.495092607	0.999827379	NS	Fatty aldehyde dehydrogenase
Tmem115	0.051533113	5.58045968	0.034715884	0.852192263	0.999827379	NS	transmembrane protein 115
Hyal2	0.150729278	4.28700039	0.130308958	0.718111915	0.999827379	NS	Hyaluronidase-2
Ifrd2	-0.817247154	1.88061451	0.692632972	0.405270251	0.999827379	NS	interferon related developmental regulator 2
Hyal1	-2.039543376	1.49514477	3.027664844	0.081855746	0.999827379	NS	Mus musculus hyaluronoglucosaminidase 1 (Hyal1)	transcript variant 2	mRNA.
Tusc2	-0.063327303	5.13702874	0.037483846	0.846483263	0.999827379	NS	tumor suppressor candidate 2
Nprl2	-0.701545792	4.45354505	3.218070148	0.072829446	0.999827379	NS	GATOR complex protein NPRL2
Slc38a3	3.192342519	2.5870398	3.476514519	0.062245718	0.999827379	NS	Sodium-coupled neutral amino acid transporter 3
Rassf1	0.44825774	5.03289593	1.456229758	0.22753096	0.999827379	NS	Ras association (RalGDS/AF-6) domain family member 1
Epn3	1.449340154	1.01318646	0.876768609	0.349088261	0.999827379	NS	Epsin-3
Rnf112	0.091507012	1.99529355	0.009569285	0.922073064	0.999827379	NS	RING finger protein 112
Slc3a2	0.151304197	8.03388608	0.191058782	0.66203686	0.999827379	NS	solute carrier family 3 (activators of dibasic and neutral amino acid transport)	member 2
Nxf1	0.306561809	6.5262393	1.456187318	0.227537734	0.999827379	NS	Nuclear RNA export factor 1
Stx5a	-0.074038701	6.59459829	0.074352428	0.785101966	0.999827379	NS	Syntaxin-5
Spire2	0.447269773	4.2076108	1.037182736	0.308477599	0.999827379	NS	2
Prox1	0.486496574	5.88861627	2.45428941	0.117204198	0.999827379	NS	Prospero homeobox protein 1
Raver1	0.03647756	5.09412702	0.012872981	0.909666541	0.999827379	NS	ribonucleoprotein	PTB-binding 1
2610507B11Rik	-0.127858614	7.04583726	0.174094424	0.676498307	0.999827379	NS	Protein KIAA0100
AI597479	-0.389554138	4.96414522	1.252721135	0.263033391	0.999827379	NS	Ashwin
Tmem86a	0.018320255	4.82024521	0.002127396	0.963211654	0.999827379	NS	Lysoplasmalogenase-like protein TMEM86A
Ifi35	-0.527480852	4.07920139	1.402643819	0.23628141	0.999827379	NS	Interferon-induced 35 kDa protein homolog
Rdm1	0.991758481	2.05730314	1.166549958	0.280111267	0.999827379	NS	RAD52 motif-containing protein 1
Nedd8	-0.079911774	5.7621494	0.085616555	0.769825569	0.999827379	NS	NEDD8
Gosr1	-0.297675007	6.48723226	1.368066994	0.242144279	0.999827379	NS	golgi SNAP receptor complex member 1
Mrpl52	0.126576935	3.59573259	0.055624231	0.8135507	0.999827379	NS	39S ribosomal protein L52	mitochondrial
Kansl3	-0.045748907	5.65692878	0.027778061	0.867631667	0.999827379	NS	KAT8 regulatory NSL complex subunit 3
Uckl1os	0.146359587	0.03006527	0.008040664	0.928549654	0.999827379	NS	uridine-cytidine kinase 1-like 1	opposite strand
Myt1	0.231429148	6.27031408	0.820633253	0.364995083	0.999827379	NS	Myelin transcription factor 1
Faf1	0.427713186	6.81794584	2.686194644	0.101221288	0.999827379	NS	FAS-associated factor 1
Mettl16	-0.506379833	4.97285182	2.023744827	0.154856827	0.999827379	NS	U6 small nuclear RNA (adenine-(43)-N(6))-methyltransferase
Dazl	1.747562018	0.06921664	1.161839709	0.281084328	0.999827379	NS	Deleted in azoospermia-like
Pigyl	-0.359155957	3.72142675	0.496106407	0.481215947	0.999827379	NS	Phosphatidylinositol N-acetylglucosaminyltransferase subunit Y
Rbm25	0.416876226	6.90859289	2.500322236	0.113823007	0.999827379	NS	RNA-binding protein 25
Psen2	0.165721269	4.78177201	0.198877615	0.655628332	0.999827379	NS	presenilin 2
Fads1	0.236287025	5.90084337	0.771674141	0.379699641	0.999827379	NS	Fatty acid desaturase 1
Lmbr1	-0.298506837	3.8123088	0.246928596	0.619246099	0.999827379	NS	Limb region 1 protein
Tnfrsf22	0.327129474	2.49494458	0.167112181	0.682691161	0.999827379	NS	Tumor necrosis factor receptor superfamily member 22
Cars	-0.316495898	4.77045493	0.782768262	0.376295842	0.999827379	NS	Cysteine--tRNA ligase	cytoplasmic
Kdelr3	-0.0175751	4.4648022	0.001938672	0.96488021	0.999827379	NS	KDEL (Lys-Asp-Glu-Leu) endoplasmic reticulum protein retention receptor 3
Apip	0.247583153	3.65348361	0.224495327	0.635635846	0.999827379	NS	Methylthioribulose-1-phosphate dehydratase
Pdhx	-0.176324744	4.67474936	0.219215654	0.639638202	0.999827379	NS	Pyruvate dehydrogenase protein X component	mitochondrial
Vac14	-0.216727154	5.90743993	0.528262498	0.467338259	0.999827379	NS	Vac14 homolog (S. cerevisiae)
Slc5a1	-1.371336512	2.60113651	2.501563014	0.113733371	0.999827379	NS	solute carrier family 5 (sodium/glucose cotransporter)	member 1
Akt1s1	0.112120424	4.6090071	0.09234004	0.761223094	0.999827379	NS	Proline-rich AKT1 substrate 1
Tbrg1	-0.177012573	7.1863281	0.403112531	0.525486179	0.999827379	NS	Transforming growth factor beta regulator 1
Adssl1	-0.914224559	1.87730497	0.856039803	0.354849303	0.999827379	NS	adenylosuccinate synthetase like 1
Brf1	-0.561995404	4.8494876	1.697426837	0.192624835	0.999827379	NS	BRF1	RNA polymerase III transcription initiation factor 90 kDa subunit
Vipr2	0.815859666	0.92616936	0.211581281	0.645530826	0.999827379	NS	vasoactive intestinal peptide receptor 2
Odc1	0.399979825	6.6081375	1.593292155	0.206856407	0.999827379	NS	ornithine decarboxylase	structural 1
Thg1l	-2.26610665	0.18483747	1.773872278	0.182903579	0.999827379	NS	tRNA-histidine guanylyltransferase 1-like (S. cerevisiae)
Pabpc4	0.892355165	2.78031868	1.567527907	0.210566385	0.999827379	NS	poly(A) binding protein	cytoplasmic 4
Exoc3l2	0.27505933	-0.45377186	0.012929825	0.909468171	0.999827379	NS
Zfp296	-1.100378085	0.26708899	0.388428505	0.533126605	0.999827379	NS	zinc finger protein 296
Sugp1	0.112567882	5.55851224	0.17012217	0.680003254	0.999827379	NS	SURP and G-patch domain-containing protein 1
Dhdh	-0.652013889	2.48754635	0.709713842	0.399538826	0.999827379	NS	Trans-1	2-dihydrobenzene-1	2-diol dehydrogenase
Zfp790	0.051686849	5.26948778	0.02918182	0.864359898	0.999827379	NS	zinc finger protein 790
Fuz	-0.198144834	3.25009186	0.103383693	0.747806246	0.999827379	NS	fuzzy planar cell polarity protein
Sptbn4	-0.116717385	5.86792081	0.17655383	0.674351706	0.999827379	NS	spectrin beta	non-erythrocytic 4
Pgam1	0.115735604	8.01835387	0.11189655	0.737995187	0.999827379	NS	Phosphoglycerate mutase 1
Evi5	-0.23815008	5.10277658	0.391051157	0.531747386	0.999827379	NS	ecotropic viral integration site 5
Evi5l	-0.551364237	4.37530155	1.761827002	0.184396795	0.999827379	NS	Mus musculus ecotropic viral integration site 5 like (Evi5l)	transcript variant 2	mRNA.
Snapc2	0.012499975	4.45998909	0.001025974	0.974447462	0.999827379	NS	snRNA-activating protein complex subunit 2
Git1	0.207263428	6.08951381	0.582849673	0.445197503	0.999827379	NS	ARF GTPase-activating protein GIT1
Gltp	-0.095698867	5.38303992	0.111366282	0.738593973	0.999827379	NS	Glycolipid transfer protein
Bnip2	-0.286209522	3.5884289	0.228292734	0.63279264	0.999827379	NS	BCL2/adenovirus E1B 19 kDa protein-interacting protein 2
Ccnt1	0.38524205	6.11979788	2.020186674	0.155220058	0.999827379	NS	Cyclin-T1
Scarf2	0.056893622	3.39994226	0.006765872	0.934443999	0.999827379	NS	Scavenger receptor class F member 2
Brms1l	-0.152899337	4.2181501	0.127264533	0.721285298	0.999827379	NS	Breast cancer metastasis-suppressor 1-like protein
Med15	-0.097264086	6.36277583	0.150706778	0.697860849	0.999827379	NS	mediator of RNA polymerase II transcription subunit 15 isoform c
Dhdds	-0.133948403	6.21571799	0.238450209	0.625327703	0.999827379	NS	Dehydrodolichyl diphosphate synthase complex subunit Dhdds
Ubxn11	-0.987348688	1.8123152	0.96046887	0.327068775	0.999827379	NS	UBX domain protein 11
Tjap1	-0.24348535	3.97240578	0.273905857	0.600723643	0.999827379	NS	tight junction associated protein 1
Ehf	0.104110788	3.73259612	0.034166944	0.853352159	0.999827379	NS	ETS homologous factor
Rpl15	0.22401332	6.76534324	0.785030594	0.375607007	0.999827379	NS	ribosomal protein L15
Tmem167	-0.064537253	6.1324045	0.054251914	0.815823215	0.999827379	NS	transmembrane protein 167
Mplkip	-0.259360834	4.27484977	0.371251956	0.542322634	0.999827379	NS	M-phase specific PLK1 intereacting protein
Rpa3	0.121419768	3.36001631	0.043081086	0.835572667	0.999827379	NS	Replication protein A 14 kDa subunit
Mlkl	-2.276730435	0.54929603	1.564032668	0.211075736	0.999827379	NS	Mixed lineage kinase domain-like protein
Tnpo3	0.053639709	6.77958546	0.039012354	0.84342419	0.999827379	NS	Mus musculus transportin 3 (Tnpo3)	transcript variant 2	mRNA.
Ttll5	-0.295611165	4.6065223	0.563835954	0.452718794	0.999827379	NS	tubulin tyrosine ligase-like family	member 5
Zfp715	0.002909882	4.7365441	6.56E-05	0.993535581	0.999827379	NS	zinc finger protein 715
Rps5	0.31829544	5.44908182	1.231850549	0.267047452	0.999827379	NS	ribosomal protein S5
Adgrl1	0.247118388	4.53286516	0.325293719	0.568443547	0.999827379	NS	Adhesion G protein-coupled receptor L1
Amotl1	-1.253908546	2.09251763	1.920100104	0.165845625	0.999827379	NS	Angiomotin-like protein 1
Etv5	-0.220873393	4.2217837	0.220914024	0.638344359	0.999827379	NS	ETS translocation variant 5
Gfod2	-0.140390367	4.49889721	0.135024382	0.713278429	0.999827379	NS	Glucose-fructose oxidoreductase domain-containing protein 2
Enkd1	-0.23463844	1.34081263	0.043610923	0.834579169	0.999827379	NS	Enkurin domain-containing protein 1
Atp6v0d1	-0.119648048	6.28389088	0.218733944	0.640006287	0.999827379	NS	V-type proton ATPase subunit d 1
Ptprs	0.184424167	6.2008561	0.45146342	0.501640818	0.999827379	NS	Receptor-type tyrosine-protein phosphatase S
Slc41a1	0.27446255	4.69253242	0.298706313	0.584694585	0.999827379	NS	Solute carrier family 41 member 1
Igf2bp1	-1.656846947	0.25018252	1.096225057	0.295096042	0.999827379	NS	Insulin-like growth factor 2 mRNA-binding protein 1
Zfp651	-0.518214299	5.0929767	1.907661483	0.167223256	0.999827379	NS	zinc finger protein 651
Nelfb	-0.339533065	6.36002603	1.826542114	0.17653652	0.999827379	NS	negative elongation factor B isoform 1
Tmem175	0.100249355	4.78793708	0.075519439	0.783463749	0.999827379	NS	transmembrane protein 175
Tango2	-1.250450013	2.98370763	3.120931159	0.077292604	0.999827379	NS	transport and golgi organization 2
Ndufs2	-0.038432378	7.16681062	0.018867688	0.890746483	0.999827379	NS	NADH dehydrogenase [ubiquinone] iron-sulfur protein 2	mitochondrial
Atraid	0.004986672	6.88986326	0.000367862	0.984697726	0.999827379	NS	All-trans retinoic acid-induced differentiation factor
Cad	0.257032898	5.16168523	0.488105311	0.484773701	0.999827379	NS	CAD protein Glutamine-dependent carbamoyl-phosphate synthase Aspartate carbamoyltransferase Dihydroo
Sh3bp5l	-0.106621062	5.61247382	0.156292825	0.692592814	0.999827379	NS	SH3 binding domain protein 5 like
Atad1	-0.171566537	6.92084721	0.431235966	0.511383101	0.999827379	NS	ATPase family AAA domain-containing protein 1
Pten	0.023485128	6.80165524	0.007918408	0.929093483	0.999827379	NS	phosphatase and tensin homolog
Pea15a	0.083430767	8.04034022	0.055092181	0.814428209	0.999827379	NS	Mus musculus phosphoprotein enriched in astrocytes 15A (Pea15a)	transcript variant 4	mRNA.
Timm23	0.013034534	6.33454641	0.002664989	0.958828673	0.999827379	NS	translocase of inner mitochondrial membrane 23
Trnt1	0.059730428	5.56880363	0.045649709	0.830813824	0.999827379	NS	CCA tRNA nucleotidyltransferase 1	mitochondrial
Ehmt2	-0.275735485	5.70008376	0.928019941	0.335377971	0.999827379	NS	Histone-lysine N-methyltransferase EHMT2
Elof1	-0.032377721	6.00444892	0.01516867	0.901979487	0.999827379	NS	Mus musculus ELF1 homolog	elongation factor 1 (Elof1)	transcript variant 4	mRNA.
Med16	0.15004651	6.49755945	0.275405378	0.599728632	0.999827379	NS	mediator complex subunit 16
St3gal1	1.207473383	2.35403815	1.65295687	0.198556963	0.999827379	NS	ST3 beta-galactoside alpha-2	3-sialyltransferase 1
Tmem259	-0.140768416	3.33443917	0.052341446	0.819037946	0.999827379	NS	transmembrane protein 259
Rnf170	0.271046814	5.21512564	0.671000639	0.412702956	0.999827379	NS	Mus musculus ring finger protein 170 (Rnf170)	transcript variant 3	mRNA.
Clip3	-0.03368437	5.48071196	0.013669133	0.906927358	0.999827379	NS	CAP-Gly domain-containing linker protein 3
Dedd	-0.406288138	4.62966357	1.155597586	0.282380437	0.999827379	NS	Death effector domain-containing protein
Nit1	0.049548002	4.96809121	0.020756264	0.885444922	0.999827379	NS	Deaminated glutathione amidase
Prdm15	-0.158764291	3.51931171	0.066702095	0.796200477	0.999827379	NS	Mus musculus PR domain containing 15 (Prdm15)	transcript variant 2	mRNA.
Rnf168	-0.494116439	3.96938149	0.848190301	0.357064797	0.999827379	NS	E3 ubiquitin-protein ligase RNF168
Tctex1d2	-0.203752538	3.41438818	0.128189565	0.720316595	0.999827379	NS	Tctex1 domain containing 2
Chp1	0.201774591	6.29944465	0.563875167	0.452703079	0.999827379	NS	Calcineurin B homologous protein 1
Klhl3	0.878217285	-0.07392797	0.274948246	0.600031596	0.999827379	NS	Kelch-like protein 3
Tvp23b	-0.043232874	7.24219918	0.020577176	0.885936798	0.999827379	NS	trans-golgi network vesicle protein 23B
Dnajc7	0.292102366	6.83655014	1.239238751	0.265617815	0.999827379	NS	DnaJ homolog subfamily C member 7
Cacybp	0.129291975	6.84557134	0.254196852	0.614135326	0.999827379	NS	Calcyclin-binding protein
Cluap1	0.221725347	4.66104387	0.376379215	0.539547418	0.999827379	NS	Clusterin-associated protein 1
Zswim7	0.124470519	3.89139444	0.066327503	0.796760965	0.999827379	NS	zinc finger SWIM-type containing 7
Pigl	0.061687301	2.48191074	0.006255776	0.936958284	0.999827379	NS	N-acetylglucosaminyl-phosphatidylinositol de-N-acetylase
Ndufa2	-0.099965472	5.70579654	0.125523182	0.723119681	0.999827379	NS	NADH dehydrogenase [ubiquinone] 1 alpha subcomplex subunit 2
Pam16	0.117659292	4.2381014	0.074121995	0.78542707	0.999827379	NS	Mitochondrial import inner membrane translocase subunit TIM16
Glis2	-0.194583737	3.43959732	0.108430201	0.741938456	0.999827379	NS	Zinc finger protein GLIS2
Cox6c	-0.068724168	6.21897608	0.066991719	0.795768273	0.999827379	NS	Cytochrome c oxidase subunit 6C
Bicc1	0.250530114	5.62075476	0.711997698	0.398781421	0.999827379	NS	Protein bicaudal C homolog 1
Ube2z	0.054353494	6.01191222	0.045549106	0.830997537	0.999827379	NS	ubiquitin-conjugating enzyme E2Z
Tmem87b	0.014586722	6.50451901	0.003172675	0.955081709	0.999827379	NS	Mus musculus transmembrane protein 87B (Tmem87b)	transcript variant 3	mRNA.
Anapc1	-0.239979194	6.45028955	0.676527186	0.410785146	0.999827379	NS	Anaphase-promoting complex subunit 1
Mertk	0.505299073	2.41296218	0.351461122	0.553287187	0.999827379	NS	Tyrosine-protein kinase Mer
Tsg101	0.05990975	6.83900316	0.054718787	0.81504672	0.999827379	NS	tumor susceptibility gene 101
Hps5	-0.120772928	4.63384547	0.102490177	0.748861544	0.999827379	NS	Hermansky-Pudlak syndrome 5 protein homolog
Map3k4	-0.135374536	5.73200321	0.215640033	0.642382266	0.999827379	NS	Mitogen-activated protein kinase kinase kinase 4
Piezo1	-1.060936885	1.28120953	0.443248743	0.505558579	0.999827379	NS	Mus musculus piezo-type mechanosensitive ion channel component 1 (Piezo1)	transcript variant 1	mRN
Rnf166	0.150624032	4.91718854	0.188676407	0.664020523	0.999827379	NS	ring finger protein 166
Ankrd28	-0.16840416	4.98155881	0.234183434	0.628439077	0.999827379	NS	Serine/threonine-protein phosphatase 6 regulatory ankyrin repeat subunit A
Ankrd52	0.425467831	2.1960985	0.229487961	0.631903757	0.999827379	NS	Serine/threonine-protein phosphatase 6 regulatory ankyrin repeat subunit C
Pkd2l2	-0.301255206	1.49971747	0.075618888	0.783324776	0.999827379	NS	Polycystic kidney disease 2-like 2 protein
Srp19	0.093213058	5.38919709	0.091921817	0.761748034	0.999827379	NS	signal recognition particle 19
Wdfy2	-0.383063368	1.93234324	0.159416337	0.68969445	0.999827379	NS	WD repeat and FYVE domain containing 2
Rbsn	-0.058425311	5.96853331	0.03878123	0.843882705	0.999827379	NS	Rabenosyn-5
Mrps25	0.194290019	3.55029828	0.112987771	0.736767908	0.999827379	NS	28S ribosomal protein S25	mitochondrial
Dguok	0.186514375	4.9958756	0.273695037	0.600863812	0.999827379	NS	Deoxyguanosine kinase	mitochondrial
Camta1	-0.563433295	4.25893801	1.692955568	0.193211818	0.999827379	NS	Calmodulin-binding transcription activator 1
Csf1	-0.351116004	5.23963747	0.901370192	0.342414578	0.999827379	NS	Macrophage colony-stimulating factor 1 Processed macrophage colony-stimulating factor 1
Strip1	-0.201734207	5.76434231	0.529439804	0.466842473	0.999827379	NS	Striatin-interacting protein 1
Kif1a	-0.217809163	7.11989838	0.637056169	0.424778816	0.999827379	NS	kinesin family member 1A
Slc25a11	0.002581337	6.38499811	9.52E-05	0.992214854	0.999827379	NS	solute carrier family 25 (mitochondrial carrier oxoglutarate carrier)	member 11
Cmc2	-0.067972479	2.49063064	0.007673673	0.930194999	0.999827379	NS	COX assembly mitochondrial
Chfr	-0.606774773	4.38683691	1.973722857	0.160053256	0.999827379	NS	E3 ubiquitin-protein ligase CHFR
Tex261	0.062206473	6.33575819	0.060194007	0.806189567	0.999827379	NS	Protein TEX261
Fam120b	0.056849557	6.35057348	0.048681707	0.825373287	0.999827379	NS	Mus musculus family with sequence similarity 120	member B (Fam120b)	transcript variant 3	mRNA.
Tbp	-0.073653339	4.47124095	0.036015336	0.849483826	0.999827379	NS	TATA box binding protein
Psmb1	0.040919249	7.07706036	0.021963163	0.882185137	0.999827379	NS	proteasome (prosome	macropain) subunit	beta type 1
Pdcd2	0.286277284	4.16759928	0.422912395	0.515487382	0.999827379	NS	programmed cell death 2
Dll1	0.675177864	4.07459814	2.079018925	0.149336132	0.999827379	NS	Delta-like protein 1 Dll1-soluble form Dll1-derived cell-associated form Dll1-intracellular form
Slc9a5	0.484060857	0.07553243	0.059894368	0.806662974	0.999827379	NS	solute carrier family 9 (sodium/hydrogen exchanger)	member 5
Elmo3	-0.240523556	4.68654952	0.414171249	0.519859901	0.999827379	NS	Engulfment and cell motility protein 3
Stc1	2.518513111	0.80091358	2.841556233	0.091855212	0.999827379	NS	stanniocalcin 1
4931428F04Rik	0.16072128	4.91495009	0.215049702	0.642837964	0.999827379	NS	Uncharacterized protein KIAA0895-like
Msh3	-0.057672246	4.52486525	0.020354841	0.886550499	0.999827379	NS	mutS homolog 3
Tmem208	-0.32858882	4.47715608	0.709092196	0.399745346	0.999827379	NS	transmembrane protein 208
E2f4	0.099044808	5.34766746	0.112989626	0.736765827	0.999827379	NS	Transcription factor E2F4
Surf4	-0.379853922	9.40374836	0.440753619	0.506758939	0.999827379	NS	Surfeit locus protein 4
Surf2	0.339112959	4.24340114	0.63658363	0.424950629	0.999827379	NS	surfeit gene 2
Dnajb9	-0.023087276	6.8653852	0.006557626	0.935458516	0.999827379	NS	DnaJ homolog subfamily B member 9
Yes1	-0.67043278	4.62116216	3.348308776	0.067274098	0.999827379	NS	YES proto-oncogene 1	Src family tyrosine kinase
Ppp1cb	-0.298313312	7.76585981	0.828855427	0.362603703	0.999827379	NS	Serine/threonine-protein phosphatase PP1-beta catalytic subunit
Gorasp2	-0.100445127	8.47032591	0.054008963	0.816228681	0.999827379	NS	golgi reassembly stacking protein 2
Tsen15	-0.542062378	3.62530542	0.955030523	0.328442118	0.999827379	NS	tRNA splicing endonuclease subunit 15
Efr3a	0.166072346	7.18538263	0.33880686	0.560518736	0.999827379	NS	Mus musculus EFR3 homolog A (Efr3a)	transcript variant 2	mRNA.
Trappc2l	-0.10181112	5.12461442	0.096734561	0.755784047	0.999827379	NS	Trafficking protein particle complex subunit 2-like protein
Acsf3	0.186156129	4.29822692	0.195712956	0.658203707	0.999827379	NS	Acyl-CoA synthetase family member 3	mitochondrial
Ddx19a	0.088552206	5.33248104	0.085771256	0.769623584	0.999827379	NS	ATP-dependent RNA helicase DDX19A
Galns	0.062989173	5.64784264	0.039884694	0.841706197	0.999827379	NS	N-acetylgalactosamine-6-sulfatase
C8g	-0.553696103	1.95163701	0.328491662	0.566548605	0.999827379	NS	Complement component C8 gamma chain
Entpd2	-0.905108547	2.01740524	0.81468746	0.366738021	0.999827379	NS	Ectonucleoside triphosphate diphosphohydrolase 2
Rabl6	-0.229006846	6.20778869	0.769963729	0.380228273	0.999827379	NS	Rab-like protein 6
Edf1	0.098415479	6.02559535	0.145222152	0.703143707	0.999827379	NS	Endothelial differentiation-related factor 1
Npdc1	0.092664672	6.6291024	0.133792454	0.714531851	0.999827379	NS	Neural proliferation differentiation and control protein 1
Fbxw5	-0.144824843	6.10876948	0.305103499	0.580700534	0.999827379	NS	Mus musculus F-box and WD-40 domain protein 5 (Fbxw5)	transcript variant 3	mRNA.
Slc25a13	0.684096787	3.27358335	0.937168465	0.333007105	0.999827379	NS	solute carrier family 25 (mitochondrial carrier	adenine nucleotide translocator)	member 13
Ube2i	0.159194603	7.06055742	0.34036654	0.559617724	0.999827379	NS	ubiquitin-conjugating enzyme E2I
Tsr3	-0.009745946	4.31802886	0.000542796	0.981412585	0.999827379	NS	Ribosome biosis
Unkl	0.22521286	2.76627204	0.092595455	0.760903145	0.999827379	NS	unkempt family like zinc finger
Lrrk1	-0.17299064	1.64321276	0.025559534	0.872980729	0.999827379	NS	Leucine-rich repeat serine/threonine-protein kinase 1
Aldh1a3	-2.306939785	0.62594001	1.642418068	0.199994022	0.999827379	NS	Aldehyde dehydrogenase family 1 member A3
Actn1	0.191393721	3.32798127	0.104210133	0.746834638	0.999827379	NS	Mus musculus actinin	alpha 1 (Actn1)	transcript variant 2	mRNA.
Sirt2	-0.08098574	5.68579226	0.071977192	0.788479449	0.999827379	NS	NAD-dependent protein deacetylase sirtuin-2
Hnrnpl	0.024351205	6.47833342	0.008225002	0.927737491	0.999827379	NS	Heteroous nuclear ribonucleoprotein L
Nolc1	0.187392736	6.0544946	0.515803807	0.472637168	0.999827379	NS	Nucleolar and coiled-body phosphoprotein 1
Casd1	0.310520078	5.96354687	1.38493652	0.239262065	0.999827379	NS	N-acetylneuraminate 9-O-acetyltransferase
Magi1	-0.118692939	4.29780871	0.059385419	0.80746996	0.999827379	NS	Cnksr family member 3
Mtmr1	-0.31465577	4.60696647	0.562402246	0.453293957	0.999827379	NS	Myotubularin-related protein 1
Hmgb3	0.408941568	4.64515838	1.273985328	0.259020364	0.999827379	NS	High mobility group protein B3
Map2	0.008016348	6.78685926	0.000961774	0.975259585	0.999827379	NS	Microtubule-associated protein 2
Abca1	0.424822467	7.55748143	1.552699445	0.212737372	0.999827379	NS	ATP-binding cassette	sub-family A (ABC1)	member 1
Nipsnap3b	-0.230734833	5.49193435	0.660210901	0.416485497	0.999827379	NS	3B
Lage3	-0.187226117	4.04829953	0.173301826	0.677193888	0.999827379	NS	EKC/KEOPS complex subunit Lage3
Ubl4a	-0.33617179	6.02872224	1.308900652	0.252593795	0.999827379	NS	Ubiquitin-like protein 4A
Gdi1	-0.169703242	8.32569931	0.183689258	0.668221735	0.999827379	NS	Rab GDP dissociation inhibitor alpha
Zdhhc12	-0.321332424	3.25248705	0.263619106	0.607644612	0.999827379	NS	zinc finger	DHHC domain containing 12
Endog	0.2288609	3.85556042	0.226148779	0.634394272	0.999827379	NS	Endonuclease G	mitochondrial
Golga7	-0.03901384	6.75001967	0.022380135	0.881080274	0.999827379	NS	golgi autoantigen	golgin subfamily a	7
Xk	-0.530502915	4.89738622	2.287091748	0.13045416	0.999827379	NS	X-linked Kx blood group
Pcolce2	1.150116183	2.16995782	1.517847709	0.21794549	0.999827379	NS	Procollagen C-endopeptidase enhancer 2
Clpx	0.087176779	6.721104	0.116359902	0.733016504	0.999827379	NS	ATP-dependent Clp protease ATP-binding subunit clpX-like	mitochondrial
Trabd	-0.300335662	7.0168721	1.131579334	0.287438715	0.999827379	NS	Mus musculus TraB domain containing (Trabd)	transcript variant 2	mRNA.
Dennd6b	-1.357339277	2.8472605	2.90043558	0.08855562	0.999827379	NS	Protein DENND6B
Cd83	0.828485557	3.71389475	2.145371548	0.143000413	0.999827379	NS	CD83 antigen
Tmem27	0.252875353	9.36181432	0.185754799	0.666473601	0.999827379	NS	Collectrin
Ace2	-0.180192682	4.00234331	0.114867912	0.734668725	0.999827379	NS	angiotensin I converting enzyme (peptidyl-dipeptidase A) 2
Atf6b	-0.139646129	6.03939309	0.28349492	0.594419619	0.999827379	NS	activating transcription factor 6 beta
Notch4	0.918167284	0.51482818	0.411362131	0.52127895	0.999827379	NS	notch 4
Ppt2	1.466028534	1.55002772	1.736900357	0.187532052	0.999827379	NS	Lysosomal thioesterase PPT2
Prrt1	0.368063559	1.75060154	0.126285395	0.722314994	0.999827379	NS	proline-rich transmembrane protein 1
Rnf5	-0.192159097	6.09150909	0.504628264	0.477473532	0.999827379	NS	E3 ubiquitin-protein ligase RNF5
Fam163a	-0.051235087	5.19543323	0.024445399	0.875756955	0.999827379	NS	Protein FAM163A
Cacfd1	-0.01996919	6.51339972	0.00629728	0.936749942	0.999827379	NS	Calcium channel flower homolog
Hivep2	-0.472553056	4.75672573	1.151980327	0.283134981	0.999827379	NS	Mus musculus human immunodeficiency virus type I enhancer binding protein 2 (Hivep2)	transcript var
Arnt	-0.167381711	5.68875689	0.306009345	0.580139398	0.999827379	NS	Aryl hydrocarbon receptor nuclear translocator
Itga2	0.227573482	2.85691241	0.105717724	0.745073133	0.999827379	NS	Integrin alpha-2
Mocs2	-0.264324555	6.20465076	0.849234113	0.356769094	0.999827379	NS	molybdenum cofactor synthesis 2
Nat9	-0.004418782	3.64791151	6.94E-05	0.993352033	0.999827379	NS	N-acetyltransferase 9
Lpl	0.410965991	8.69114513	0.784532208	0.375758604	0.999827379	NS	lipoprotein lipase
Atp6v0e	0.147118901	6.56481014	0.345066524	0.556919226	0.999827379	NS	V-type proton ATPase subunit e 1
Zfp318	0.081547011	3.97805603	0.023906583	0.877122842	0.999827379	NS	zinc finger protein 318
Srf	0.732200237	4.67906067	3.343896785	0.067454682	0.999827379	NS	Serum response factor
Lama5	-1.145701032	1.50555308	1.01137101	0.314574611	0.999827379	NS	Laminin subunit alpha-5
Steap1	0.050516559	0.02213828	0.000660336	0.979499015	0.999827379	NS	Metalloreductase STEAP1
Steap2	0.369766651	4.94929478	0.9380092	0.332790351	0.999827379	NS	six transmembrane epithelial antigen of prostate 2
Hspa8	0.42448194	10.04341689	0.372317154	0.541743922	0.999827379	NS	Heat shock cognate 71 kDa protein
Serac1	-0.302392655	1.45490818	0.070943623	0.789967788	0.999827379	NS	Protein SERAC1
Pdzd11	-0.322486738	4.85766918	0.844411834	0.358138025	0.999827379	NS	PDZ domain-containing protein 11
Psma2	-0.016235982	6.95214319	0.003788735	0.950919042	0.999827379	NS	Proteasome subunit alpha type-2
Mrpl32	-0.108975185	4.57321661	0.071524412	0.789130033	0.999827379	NS	39S ribosomal protein L32	mitochondrial
Setdb1	-0.635793044	5.15284464	3.896683105	0.048381538	0.999827379	NS	SET domain	bifurcated 1
Arnt2	0.510516115	3.53266967	0.805780163	0.369370795	0.999827379	NS	Aryl hydrocarbon receptor nuclear translocator 2
Prune1	-0.670405622	4.11743963	2.199521859	0.138053554	0.999827379	NS	Exopolyphosphatase PRUNE1
Cers2	0.054850221	6.49101689	0.044401308	0.833108749	0.999827379	NS	Ceramide synthase 2
Capza2	-0.033655555	7.5542656	0.012591437	0.910655655	0.999827379	NS	F-actin-capping protein subunit alpha-2
Plekho1	-0.200772472	0.58638902	0.020524876	0.886080854	0.999827379	NS	Pleckstrin homology domain-containing family O member 1
Vps45	-0.149875269	4.69846432	0.163466053	0.685985248	0.999827379	NS	vacuolar protein sorting 45
Prpf3	0.082230458	4.65791546	0.045541835	0.831010824	0.999827379	NS	U4/U6 small nuclear ribonucleoprotein Prp3
Anp32e	-0.078516428	7.4243708	0.053784898	0.81660348	0.999827379	NS	Acidic leucine-rich nuclear phosphoprotein 32 family member E
Aph1a	0.171536301	5.83122958	0.394409882	0.529990441	0.999827379	NS	Gamma-secretase subunit APH-1A
Tab2	0.204112727	4.1670208	0.162616645	0.686758772	0.999827379	NS	TGF-beta-activated kinase 1 and MAP3K7-binding protein 2
Ppil4	-0.069641771	6.17270825	0.068644688	0.793320429	0.999827379	NS	Peptidyl-prolyl cis-trans isomerase-like 4
Cnih1	0.130735125	5.68215357	0.210838871	0.646110699	0.999827379	NS	1
Eps8	0.175541422	7.0973682	0.27943916	0.597069047	0.999827379	NS	Epidermal growth factor receptor kinase substrate 8
Med22	-0.123523576	6.44982278	0.240235772	0.62403588	0.999827379	NS	Mediator of RNA polymerase II transcription subunit 22
Surf1	-0.421704811	4.7241881	1.386893052	0.23893049	0.999827379	NS	Surfeit locus protein 1
Med28	0.175730704	6.35119333	0.451594196	0.501578867	0.999827379	NS	Mediator of RNA polymerase II transcription subunit 28
Qdpr	-0.050489506	7.57813225	0.02757118	0.868120972	0.999827379	NS	quinoid dihydropteridine reductase
Tnr	-0.028384326	6.31592323	0.00864292	0.925929536	0.999827379	NS	Tenascin-R
Sqstm1	0.063326043	9.17162175	0.012783435	0.909979933	0.999827379	NS	Sequestosome-1
Nfe2l2	0.125778225	5.90424228	0.21298377	0.64443874	0.999827379	NS	Nuclear factor erythroid 2-related factor 2
Rxra	0.268499065	4.05723817	0.354912565	0.551345333	0.999827379	NS	retinoid X receptor alpha
Adamtsl4	0.086476729	0.97452987	0.002624722	0.959140617	0.999827379	NS	ADAMTS-like protein 4
Prpsap1	0.42380537	5.67231175	2.510707111	0.113075184	0.999827379	NS	phosphoribosyl pyrophosphate synthetase-associated protein 1
Ncapg	0.907890547	2.386899	0.92181291	0.336999411	0.999827379	NS	non-SMC condensin I complex subunit G
Lcorl	-0.208123784	5.45805139	0.475980638	0.490248586	0.999827379	NS	Ligand-dependent nuclear receptor corepressor-like protein
Lta4h	0.236978462	5.30968891	0.602024336	0.437806691	0.999827379	NS	Leukotriene A-4 hydrolase
Dstn	0.158461038	8.54765464	0.132116858	0.716247227	0.999827379	NS	Destrin
H2afy	-0.027825609	8.02748081	0.00647554	0.935862869	0.999827379	NS	Core histone macro-H2A.1
Gtf2ird2	-0.229720544	3.82068542	0.214241816	0.643462834	0.999827379	NS	ral transcription factor II-I repeat domain-containing protein 2
Bola1	-0.049087326	3.26485973	0.006740379	0.934567345	0.999827379	NS	BolA-like protein 1
Gatsl2	-0.002645655	7.67781586	6.95E-05	0.993346407	0.999827379	NS	GATS protein-like 2
Adss	-0.19544921	4.78170975	0.300348829	0.583663819	0.999827379	NS	adenylosuccinate synthetase	non muscle
Cacna1d	-0.352626708	5.51919555	1.030890684	0.309949564	0.999827379	NS	Voltage-dependent L-type calcium channel subunit alpha-1D
Chdh	0.187451462	-0.15517449	0.007258789	0.932103564	0.999827379	NS	Choline dehydrogenase	mitochondrial
Actr8	0.225355479	6.08739896	0.720245108	0.396063521	0.999827379	NS	Actin-related protein 8
Lrrc27	0.54442804	3.04898762	0.678377549	0.41014597	0.999827379	NS	Leucine-rich repeat-containing protein 27
Fnta	0.073282332	6.47670474	0.085501568	0.76997583	0.999827379	NS	Protein farnesyltransferase/geranylgeranyltransferase type-1 subunit alpha
Skiv2l2	-0.184615567	5.96368319	0.502846908	0.478251879	0.999827379	NS	Superkiller viralicidic activity 2-like 2
Lbp	0.620038727	1.79461781	0.355872655	0.550807441	0.999827379	NS	Lipopolysaccharide-binding protein
Celsr1	-0.205953368	1.24536864	0.029501865	0.863625374	0.999827379	NS	Cadherin EGF LAG seven-pass G-type receptor 1
Stard13	-0.220451813	5.09284041	0.440132548	0.507058487	0.999827379	NS	StAR-related lipid transfer protein 13
Camk1g	-0.045580397	5.69505192	0.02226458	0.881385401	0.999827379	NS	Calcium/calmodulin-dependent protein kinase type 1G
Diexf	0.018633231	2.40509801	0.000457776	0.98293	0.999827379	NS	digestive organ expansion factor homolog (zebrafish)
Syt14	-0.393429657	5.58615177	2.022258717	0.155008418	0.999827379	NS	Synaptotagmin-14
H2-M3	-0.170624927	4.0703515	0.147037047	0.701383097	0.999827379	NS
Lonrf3	-0.72618459	-0.03318673	0.136372576	0.71191413	0.999827379	NS	LON peptidase N-terminal domain and RING finger protein 3
Atp5e	-0.000305829	5.26672616	9.23E-07	0.999233451	0.999827379	NS	ATP synthase subunit epsilon	mitochondrial
Nelfcd	-0.440245545	5.60052552	2.754283006	0.096994291	0.999827379	NS	Negative elongation factor D
Tubb1	-1.177511715	1.49060023	0.56479196	0.452335907	0.999827379	NS	tubulin	beta 1 class VI
Ctsz	-0.241967584	5.52907864	0.716805647	0.397193718	0.999827379	NS	cathepsin Z
Prelid3b	-0.043040292	5.86164582	0.024740264	0.875016	0.999827379	NS	PRELI domain containing 3B
Sertad4	-0.201403776	5.61212028	0.481893446	0.487565913	0.999827379	NS	SERTA domain-containing protein 4
Ube2a	-0.107893318	4.65472097	0.08119699	0.775681793	0.999827379	NS	ubiquitin-conjugating enzyme E2A
Slc25a5	0.147052243	7.98737233	0.180446368	0.670989919	0.999827379	NS	solute carrier family 25 (mitochondrial carrier	adenine nucleotide translocator)	member 5
Ppdpf	0.276126084	4.62382651	0.563203266	0.45297247	0.999827379	NS	Pancreatic progenitor cell differentiation and proliferation factor
Kcnq2	-1.109531275	1.00880107	0.434275026	0.509898679	0.999827379	NS	potassium voltage-gated channel subfamily KQT member 2 isoform 13
Col20a1	-3.592821105	0.76402443	4.131013292	0.042104133	0.999827379	NS	Collagen alpha-1(XX) chain
Pls3	-0.503255322	4.274779	0.930523947	0.334726815	0.999827379	NS	Mus musculus plastin 3 (T-isoform) (Pls3)	transcript variant 4	mRNA.
Mpped2	-0.365489108	2.45761517	0.197135208	0.657043229	0.999827379	NS	Metallophosphoesterase MPPED2
Nkap	-0.08747523	4.18043316	0.040250876	0.840990862	0.999827379	NS	NF-kappa-B-activating protein
Ndufa1	0.011886167	6.483575	0.001676525	0.96733943	0.999827379	NS	NADH dehydrogenase [ubiquinone] 1 alpha subcomplex subunit 1
E2f3	-0.090458494	1.7172256	0.0077047	0.93005438	0.999827379	NS	Transcription factor E2F3
Cr1l	-0.004201795	6.06856919	0.000244857	0.987515282	0.999827379	NS	Mus musculus complement component (3b/4b) receptor 1-like (Cr1l)	transcript variant 2	mRNA.
Ppfibp1	0.247668197	6.30666803	0.935756743	0.333371493	0.999827379	NS	PTPRF interacting protein	binding protein 1 (liprin beta 1)
Cd34	-0.732291066	2.40444615	0.300217767	0.583745932	0.999827379	NS	Hematopoietic progenitor cell antigen CD34
Plgrkt	-0.155679123	3.80648329	0.094423307	0.758627398	0.999827379	NS	Plasminogen receptor (KT)
Cd274	-0.401259777	3.19317628	0.393970216	0.530219836	0.999827379	NS	CD274 antigen
Gtf3a	-0.025145801	5.61528582	0.00918721	0.923639758	0.999827379	NS	transcription factor IIIA
Mtif3	0.008435136	4.81615622	0.0005541	0.981220065	0.999827379	NS	mitochondrial translational initiation factor 3
Lnx2	-0.462793484	5.04768119	1.430333296	0.231710052	0.999827379	NS	Ligand of Numb protein X 2
Dyrk3	0.713457892	5.25474881	4.68813067	0.030371672	0.999827379	NS	Dual specificity tyrosine-phosphorylation-regulated kinase 3
Mapkapk2	0.228249553	6.30948896	0.807975648	0.368719428	0.999827379	NS	MAP kinase-activated protein kinase 2
Lamp2	0.175416236	7.8516767	0.270640983	0.602902119	0.999827379	NS	Lysosome-associated membrane glycoprotein 2
Atxn10	-0.128290918	8.01241731	0.140037249	0.708243984	0.999827379	NS	Ataxin-10
Foxred2	-0.058451896	6.12043566	0.047401171	0.82764876	0.999827379	NS	FAD-dependent oxidoreductase domain-containing protein 2
Eif3d	0.062751585	7.13848529	0.052270472	0.819158554	0.999827379	NS	Eukaryotic translation initiation factor 3 subunit D
H3f3b	0.250091998	9.70183499	0.158067593	0.690941905	0.999827379	NS	Histone H3.3
Nup50	-0.120470487	5.93947385	0.20540942	0.650389497	0.999827379	NS	Nuclear pore complex protein Nup50
Phf21b	0.022270459	2.99520569	0.001016292	0.974568284	0.999827379	NS	PHD finger protein 21B
Ift27	0.045149436	4.51759878	0.014166971	0.905255482	0.999827379	NS	Intraflagellar transport
Pacsin2	-0.595606591	5.17877882	2.293188857	0.129942707	0.999827379	NS	protein kinase C and casein kinase substrate in neurons 2
Ttll12	0.723388177	3.8098688	2.113770948	0.145979207	0.999827379	NS	tubulin tyrosine ligase-like family	member 12
Bik	0.711268575	3.07256939	0.995789618	0.318331446	0.999827379	NS	Bcl-2-interacting killer
Tox4	0.012854495	6.9512413	0.002142605	0.963080482	0.999827379	NS	TOX high mobility group box family member 4
Mrps18c	0.08252289	4.50663148	0.042825658	0.836053897	0.999827379	NS	28S ribosomal protein S18c	mitochondrial
Srsf6	0.056674402	7.99555635	0.026316504	0.871129757	0.999827379	NS	serine/arginine-rich splicing factor 6
Plcg1	-0.102615184	5.25858372	0.096548061	0.756012093	0.999827379	NS	1-phosphatidylinositol 4	5-bisphosphate phosphodiesterase gamma-1
Kctd2	0.005447362	5.15950742	0.000266874	0.986966117	0.999827379	NS	potassium channel tetramerization domain containing 2
Tmprss6	0.511218504	2.44597668	0.416879054	0.518498458	0.999827379	NS	Mus musculus transmembrane serine protease 6 (Tmprss6)	transcript variant 2	mRNA.
Kctd5	-0.062350579	5.42538182	0.035682398	0.850172878	0.999827379	NS	potassium channel tetramerization domain containing 5
Etaa1	-0.644556278	3.87862616	1.771275565	0.183224297	0.999827379	NS	Ewing's tumor-associated antigen 1 homolog
Il13ra1	-0.20223704	5.49108317	0.446317075	0.504089126	0.999827379	NS	Interleukin-13 receptor subunit alpha-1
Nbr1	-0.186162441	8.32126965	0.221847117	0.637636098	0.999827379	NS	neighbor of Brca1 gene 1
Cyth1	0.240796351	6.30357737	0.827050831	0.363126701	0.999827379	NS	Cytohesin-1
Rnd3	0.666723004	4.51500826	2.466588608	0.116290075	0.999827379	NS	Rho-related GTP-binding protein RhoE
Brca1	-0.34586529	1.82477938	0.058143099	0.80945529	0.999827379	NS	Breast cancer type 1 susceptibility protein homolog
Nt5c3b	0.28384763	4.02045482	0.386680467	0.534049471	0.999827379	NS	5'-nucleotidase	cytosolic IIIB
Coa3	-0.303028937	6.15345678	1.334008705	0.248093315	0.999827379	NS	Cytochrome c oxidase assembly factor 3 homolog	mitochondrial
Zpbp2	-0.543817223	-0.39095386	0.063217089	0.801481608	0.999827379	NS	zona pellucida binding protein 2
Gsdma	-0.499001043	1.51511418	0.201730326	0.653327787	0.999827379	NS	Gasdermin-A
Med24	0.164135183	6.18339047	0.31222056	0.576320747	0.999827379	NS	Mediator of RNA polymerase II transcription subunit 24
Psmd3	-0.099149445	7.20475673	0.124622829	0.724073756	0.999827379	NS	26S proteasome non-ATPase regulatory subunit 3
Exosc10	-0.260528584	5.88309043	0.907692717	0.340727351	0.999827379	NS	Mus musculus exosome component 10 (Exosc10)	transcript variant 5	mRNA.
Glod4	-0.142223315	6.14952198	0.288891614	0.590931687	0.999827379	NS	Glyoxalase domain-containing protein 4
Vps53	-0.011210469	5.85309698	0.001765893	0.96648074	0.999827379	NS	VPS53 GARP complex subunit
Taok1	-0.118771064	4.67027414	0.107752585	0.742717437	0.999827379	NS	TAO kinase 1
Dnttip1	0.079242284	5.39306928	0.068266636	0.793877477	0.999827379	NS	Deoxynucleotidyltransferase terminal-interacting protein 1
Acot8	-0.340731194	2.88553559	0.256161775	0.612769415	0.999827379	NS	Acyl-coenzyme A thioesterase 8
Pyy	0.431367271	11.94397492	0.170133596	0.679993104	0.999827379	NS	peptide YY
Mpp2	-0.264586492	5.50793423	0.941394477	0.331919476	0.999827379	NS	Mus musculus membrane protein	palmitoylated 2 (MAGUK p55 subfamily member 2) (Mpp2)	transcript var
Ppy	-0.353052102	10.79073925	0.154917728	0.693879413	0.999827379	NS	pancreatic polypeptide
Vtn	1.812701834	3.70113184	3.46282761	0.0627629	0.999827379	NS	vitronectin
Nlk	0.352603253	3.6781951	0.444820187	0.504805085	0.999827379	NS	Serine/threonine-protein kinase NLK
Traf4	0.216394712	4.82429378	0.368377069	0.543890236	0.999827379	NS	TNF receptor-associated factor 4
Aldoc	0.228936153	5.25218374	0.529660623	0.466749575	0.999827379	NS	Fructose-bisphosphate aldolase C
Rpl19	0.247559925	7.11037946	0.771401568	0.379783815	0.999827379	NS	ribosomal protein L19
Nek8	1.200509554	2.25134525	1.873539066	0.171070296	0.999827379	NS	Serine/threonine-protein kinase Nek8
Cacnb4	-0.28132405	0.34279396	0.036581978	0.84831864	0.999827379	NS	Mus musculus calcium channel	voltage-dependent	beta 4 subunit (Cacnb4)	transcript variant 6	mRNA
Zfp207	-0.24816478	6.96553787	0.872835576	0.350171496	0.999827379	NS	zinc finger protein 207
Psmd11	-0.250086926	6.12059406	0.836250408	0.360471363	0.999827379	NS	26S proteasome non-ATPase regulatory subunit 11
C1qtnf1	-0.197603756	1.93255527	0.041871404	0.837865097	0.999827379	NS	Complement C1q tumor necrosis factor-related protein 1
Pipox	1.874190704	1.07894382	2.140930169	0.143414911	0.999827379	NS	pipecolic acid oxidase
Timp2	-0.455632586	5.52103262	2.621843316	0.105401935	0.999827379	NS	tissue inhibitor of metalloproteinase 2
Zc3h18	-0.04254381	5.2145715	0.01796316	0.893381451	0.999827379	NS	zinc finger CCCH-type containing 18
Top2b	0.085782397	7.12285594	0.096844288	0.75564999	0.999827379	NS	DNA topoisomerase 2-beta
Igfbp4	-0.921058517	4.34608925	0.434377834	0.509848593	0.999827379	NS	Insulin-like growth factor-binding protein 4
Cdc6	1.195743856	2.90529525	2.582563239	0.108046571	0.999827379	NS	Cell division control
Suz12	0.185057737	5.49402177	0.460047895	0.49760159	0.999827379	NS	Polycomb protein Suz12
Atad5	-0.36905079	3.08981398	0.242567329	0.622357973	0.999827379	NS	ATPase family AAA domain-containing protein 5
Crlf3	0.145369802	3.26031381	0.055918877	0.813066644	0.999827379	NS	Cytokine receptor-like factor 3
Tnfaip1	-0.043110465	6.10353056	0.018735195	0.891128361	0.999827379	NS	tumor necrosis factor	alpha-induced protein 1 (endothelial)
Abr	-0.386915441	6.29734334	2.11984038	0.145401697	0.999827379	NS	active BCR-related gene
Rab11fip4	0.870901081	2.87259886	1.603580661	0.205396516	0.999827379	NS	Rab11 family-interacting protein 4
Cd40	-0.008832961	1.86054764	7.90E-05	0.992906786	0.999827379	NS	Tumor necrosis factor receptor superfamily member 5
Slc35c2	0.194748663	5.79042378	0.50449803	0.477530366	0.999827379	NS	solute carrier family 35	member C2
Zfp334	-0.180569442	4.03734344	0.145259255	0.703107588	0.999827379	NS	zinc finger protein 334
Elmo2	0.08546789	5.84601842	0.103597755	0.747554173	0.999827379	NS	Engulfment and cell motility protein 2
Wsb1	0.276013265	5.02620686	0.513613397	0.473578814	0.999827379	NS	WD repeat and SOCS box-containing 1
Ttpal	-0.130611932	5.55501372	0.213601889	0.643958809	0.999827379	NS	tocopherol (alpha) transfer protein-like
Rhot1	-0.147355624	6.25098916	0.315894784	0.574085237	0.999827379	NS	ras homolog family member T1
Hnf4g	-1.986155779	1.778072	2.09986056	0.147312572	0.999827379	NS	hepatocyte nuclear factor 4 gamma
Rhbdl3	-0.135631552	5.5945539	0.259606986	0.610390289	0.999827379	NS	Rhomboid-related protein 3
Ada	0.845503079	0.00456102	0.172387369	0.677998735	0.999827379	NS	Adenosine deaminase
Serinc3	0.040966802	8.06230533	0.013577595	0.907238108	0.999827379	NS	Serine incorporator 3
Tha1	-0.284445941	3.30239562	0.18488894	0.667204997	0.999827379	NS	threonine aldolase 1
Pgs1	-0.091044552	4.99420034	0.070059863	0.791249639	0.999827379	NS	CDP-diacylglycerol--glycerol-3-phosphate 3-phosphatidyltransferase	mitochondrial
Birc5	-0.884638075	1.39449782	0.523410401	0.469390517	0.999827379	NS	Baculoviral IAP repeat-containing protein 5
Afmid	1.227645292	1.51444352	1.103857764	0.293421042	0.999827379	NS	Kynurenine formamidase
Wfdc2	1.505047443	-0.11873233	0.797324279	0.371894572	0.999827379	NS	WAP four-disulfide core domain 2
Dbndd2	-0.508704271	2.24064562	0.357340363	0.549987053	0.999827379	NS	Dysbindin domain-containing protein 2
Slc12a5	0.528111624	1.90031921	0.290990297	0.589586623	0.999827379	NS	solute carrier family 12	member 5
Ghdc	0.333020692	4.13719491	0.487453225	0.485065567	0.999827379	NS	GH3 domain-containing protein
Pltp	-0.697666122	2.03488576	0.220553725	0.638618331	0.999827379	NS	phospholipid transfer protein
Slc12a7	0.279279019	7.18458127	0.656952515	0.417637886	0.999827379	NS	solute carrier family 12	member 7
Ctsa	0.182752923	6.83969837	0.487093277	0.4852268	0.999827379	NS	cathepsin A
Zswim1	0.356886938	4.9547268	0.788348768	0.374599889	0.999827379	NS	zinc finger SWIM-type containing 1
Slc12a4	-0.849096689	3.10944611	1.661110128	0.197453503	0.999827379	NS	solute carrier family 12	member 4
Myo1c	-0.307733233	6.16551067	1.017422467	0.313131188	0.999827379	NS	Unconventional myosin-Ic
Crk	-0.145032807	6.25383616	0.244686542	0.62084155	0.999827379	NS	Adapter molecule crk
Cox7c	0.039658046	6.12946353	0.020663535	0.885699335	0.999827379	NS	Cytochrome c oxidase subunit 7C	mitochondrial
Pitpna	-0.060169224	6.69864472	0.057528475	0.810445813	0.999827379	NS	phosphatidylinositol transfer protein	alpha
Mlx	-0.140630264	5.60843647	0.257633238	0.611750834	0.999827379	NS	MAX-like protein X
Retreg3	-0.307465263	5.04038434	0.75854981	0.383782737	0.999827379	NS	Reticulophagy regulator 3
Dhx58	0.203306588	1.31953872	0.032117781	0.857769402	0.999827379	NS	Probable ATP-dependent RNA helicase DHX58
Rab5a	-0.088813821	7.73695564	0.074778938	0.784501651	0.999827379	NS	Ras-related protein Rab-5A
Nkiras2	-0.064139749	6.07793281	0.058677997	0.808597754	0.999827379	NS	NF-kappa-B inhibitor-interacting Ras-like protein 2
Ppp2r5c	0.05515739	7.26121289	0.033460392	0.854859363	0.999827379	NS	protein phosphatase 2	regulatory subunit B'	gamma
Ift52	0.12403022	5.99244958	0.23082011	0.630916395	0.999827379	NS	Intraflagellar transport
Mybl2	-1.246354628	0.80550604	0.713967222	0.398129928	0.999827379	NS	Myb-related protein B
Sgk2	-0.337735295	4.48514831	0.77507878	0.378650462	0.999827379	NS	Serine/threonine-protein kinase Sgk2
Eya2	-0.295216706	0.9517454	0.044752625	0.832459554	0.999827379	NS	Eyes absent homolog 2
B4galt5	0.092300603	4.90660542	0.069640456	0.791860996	0.999827379	NS	Beta-1	4-galactosyltransferase 5
Gdap1l1	0.073910075	6.12472055	0.082386496	0.774088983	0.999827379	NS	Ganglioside-induced differentiation-associated protein 1-like 1
Hnf4a	-0.480224684	6.00661064	3.497777622	0.061451241	0.999827379	NS	Hepatocyte nuclear factor 4-alpha
Cadps2	-0.097623514	4.03835969	0.038687215	0.844069621	0.999827379	NS	Calcium-dependent secretion activator 2
Ddx27	0.275375418	4.9759558	0.620194526	0.430975008	0.999827379	NS	Probable ATP-dependent RNA helicase DDX27
Cyth3	-0.14766352	5.27544425	0.202508538	0.652703601	0.999827379	NS	Cytohesin-3
Cyth4	0.438647926	2.93658077	0.377958502	0.538697842	0.999827379	NS	Cytohesin-4
Rac3	-0.142561674	0.42778795	0.00989606	0.920758005	0.999827379	NS	RAS-related C3 botulinum substrate 3
Rrp7a	-0.226439509	5.50644017	0.670877471	0.412745848	0.999827379	NS	Ribosomal RNA-processing A
Cyb5r3	0.062574262	9.88047969	0.008804171	0.925243767	0.999827379	NS	NADH-cytochrome b5 reductase 3 NADH-cytochrome b5 reductase 3 membrane-bound form NADH-cytochrome b5
Ints2	-0.180907902	5.09655032	0.30521129	0.580633704	0.999827379	NS	Integrator complex subunit 2
Med13l	-0.518426307	4.0269654	1.110072503	0.292066189	0.999827379	NS	mediator of RNA polymerase II transcription subunit 13-like isoform 1
Hist1h2bc	0.099450683	6.71100466	0.139136738	0.709140724	0.999827379	NS	Histone H2B type 1-C/E/G
Baiap2l2	-0.818685747	-0.05574126	0.170496884	0.679670588	0.999827379	NS	Brain-specific angiosis inhibitor 1-associated protein 2-like protein 2
Mafk	0.151643822	5.66661188	0.236968666	0.626404128	0.999827379	NS	v-maf musculoaponeurotic fibrosarcoma oncogene family	protein K (avian)
Med1	0.168053627	5.35443445	0.210780722	0.646156169	0.999827379	NS	Mediator of RNA polymerase II transcription subunit 1
Erbb3	-0.235737047	2.79768002	0.086654721	0.76847386	0.999827379	NS	Receptor tyrosine-protein kinase erbB-3
Stard3	-0.539745258	3.95421421	1.321982414	0.250236579	0.999827379	NS	START domain containing 3
Ikzf3	0.27315591	2.07538686	0.083084148	0.773160575	0.999827379	NS	Zinc finger protein Aiolos
Mfng	-0.241062686	5.13909526	0.393600744	0.530412744	0.999827379	NS	Beta-1	3-N-acetylglucosaminyltransferase manic fringe
Vmp1	-0.235802769	6.01531451	0.787443059	0.37487441	0.999827379	NS	vacuole membrane protein 1
Uchl5	0.269340416	4.59806626	0.481719587	0.487644445	0.999827379	NS	ubiquitin carboxyl-terminal esterase L5
Glrx2	-0.014076752	4.80224708	0.001609381	0.967999775	0.999827379	NS	Glutaredoxin-2	mitochondrial
Trove2	0.066696427	6.02396938	0.062544141	0.80251909	0.999827379	NS	TROVE domain family	member 2
Stk4	0.198194826	5.83794084	0.548209827	0.459050082	0.999827379	NS	serine/threonine kinase 4
Pmp22	-0.005330665	4.6708056	0.000186657	0.989099439	0.999827379	NS	peripheral myelin protein 22 isoform 2
Zcchc10	0.054769439	3.25679346	0.008329817	0.927279778	0.999827379	NS	zinc finger	CCHC domain containing 10
Psmb6	0.08867451	6.93120483	0.114136728	0.735482803	0.999827379	NS	Proteasome subunit beta type-6
Spag7	0.123171679	5.83759751	0.211144913	0.645871509	0.999827379	NS	Sperm-associated antigen 7
Pfn1	0.02713244	6.87641221	0.010757799	0.917391704	0.999827379	NS	profilin 1
Tomm34	0.097341161	6.19909939	0.136670198	0.711613985	0.999827379	NS	Mitochondrial import receptor subunit TOM34
Ywhab	0.001754585	7.51990242	3.48E-05	0.99529292	0.999827379	NS	tyrosine 3-monooxygenase/tryptophan 5-monooxygenase activation protein	beta polypeptide
Gpx3	0.272742301	8.1003219	0.411395025	0.521262294	0.999827379	NS	Glutathione peroxidase 3
Anxa6	0.007417503	7.58865062	0.000575468	0.980861446	0.999827379	NS	Annexin A6
Zkscan6	-0.122522694	4.28354721	0.078684014	0.779088779	0.999827379	NS	zinc finger with KRAB and SCAN domains 6
Kpna2	-0.035369429	7.29116673	0.014191027	0.905175457	0.999827379	NS	Importin subunit alpha-1
Smurf2	-0.577071102	4.46314336	1.93041741	0.164712785	0.999827379	NS	E3 ubiquitin-protein ligase SMURF2
Cep95	-0.220888609	2.17159889	0.064835731	0.799009957	0.999827379	NS	Centrosomal protein of 95 kDa
Vezf1	0.062220522	6.51497418	0.05463161	0.815191446	0.999827379	NS	vascular endothelial zinc finger 1
Cuedc1	0.079000396	5.19660337	0.048653047	0.825423869	0.999827379	NS	CUE domain-containing protein 1
Srsf1	-0.198755169	5.64043118	0.279614442	0.596954037	0.999827379	NS	Serine/arginine-rich splicing factor 1
Shroom1	0.057875511	0.58711455	0.001717493	0.966943015	0.999827379	NS	shroom family member 1
Kif3a	-0.3146002	4.3998269	0.57339475	0.448913078	0.999827379	NS	Kinesin-like protein KIF3A
8-Sep	-0.811382933	3.58529524	2.124107037	0.144997264	0.999827379	NS	Mus musculus septin 8 (Sept8)	transcript variant 4	mRNA.
Mtmr4	-0.213039021	6.34565031	0.713756068	0.398199701	0.999827379	NS	Mus musculus myotubularin related protein 4 (Mtmr4)	transcript variant 2	mRNA.
Mrm1	0.095292147	4.61155372	0.062831145	0.802075894	0.999827379	NS	rRNA methyltransferase 1	mitochondrial
Mapt	-0.052074589	5.4308667	0.028894235	0.865023473	0.999827379	NS	Microtubule-associated protein tau
Kansl1	-0.077105144	6.231414	0.084069143	0.771856943	0.999827379	NS	KAT8 regulatory NSL complex subunit 1
Myo1b	0.25378252	5.79537217	0.85610902	0.35482985	0.999827379	NS	myosin IB
Dhx40	0.036593038	5.96832303	0.0195736	0.888734512	0.999827379	NS	Probable ATP-dependent RNA helicase DHX40
Ypel2	0.119932495	3.09054652	0.034022001	0.853660025	0.999827379	NS	yippee like 2
Akap1	0.133588701	3.51869228	0.050735973	0.821787538	0.999827379	NS	A-kinase anchor protein 1	mitochondrial
Nol11	0.016264268	5.53748175	0.003011164	0.956238787	0.999827379	NS	Nucleolar protein 11
Derl2	-0.431129855	7.42952215	1.787608153	0.181217857	0.999827379	NS	Derlin-2
C1qbp	0.026464481	5.12617771	0.006812603	0.934218508	0.999827379	NS	complement C1q binding protein
Rpain	0.185565005	2.16801809	0.045338985	0.831381928	0.999827379	NS	RPA interacting protein
6330403K07Rik	0.833792574	4.28957078	3.660177769	0.055727687	0.999827379	NS	RIKEN cDNA 6330403K07 gene
Kcnab3	-0.220136563	4.40387404	0.216459957	0.641750594	0.999827379	NS	potassium voltage-gated channel subfamily A regulatory beta subunit 3
Chd3	-0.058521863	5.45872883	0.040761863	0.839998284	0.999827379	NS	chromodomain helicase DNA binding protein 3
Kdm6b	0.067644123	2.99319316	0.009917496	0.920672514	0.999827379	NS	Lysine-specific demethylase 6B
Appbp2	0.064255033	6.72370206	0.062099538	0.803207789	0.999827379	NS	Amyloid protein-binding protein 2
Adora2b	0.913775555	4.20441645	4.159653798	0.041397865	0.999827379	NS	adenosine A2b receptor
Ncor1	0.142606936	7.44898933	0.227748381	0.633198419	0.999827379	NS	nuclear receptor co-repressor 1
Cenpv	0.067002918	4.26185714	0.025018814	0.87432019	0.999827379	NS	Centromere protein V
Pcgf2	0.385201996	0.4402213	0.072112555	0.788285375	0.999827379	NS	Polycomb group RING finger protein 2
Cwc25	0.428973873	5.22104553	1.719450521	0.18976379	0.999827379	NS	Pre-mRNA-splicing factor CWC25 homolog
Pip4k2b	-0.358665495	0.2044363	0.054584167	0.815270258	0.999827379	NS	Phosphatidylinositol 5-phosphate 4-kinase type-2 beta
Trim37	-0.064755216	6.8186758	0.05891125	0.808225103	0.999827379	NS	E3 ubiquitin-protein ligase TRIM37
Ctdnep1	0.271355256	2.6084881	0.131131193	0.71726205	0.999827379	NS	CTD nuclear envelope phosphatase 1
Elp5	0.115641473	5.10866913	0.129584386	0.718863351	0.999827379	NS	Elongator complex protein 5
Gabarap	-0.064322959	7.35208078	0.044730003	0.832501277	0.999827379	NS	Gamma-aminobutyric acid receptor-associated protein
Cldn7	0.524530343	6.71978062	3.181732399	0.07446574	0.999827379	NS	Claudin-7
2810408A11Rik	1.117034845	0.68296843	0.622439799	0.430142084	0.999827379	NS	RIKEN cDNA 2810408A11 gene
Phf23	0.575579605	5.37378205	3.7504906	0.052792014	0.999827379	NS	PHD finger protein 23
Acadvl	-0.162566213	6.42750187	0.426713283	0.513606113	0.999827379	NS	acyl-Coenzyme A dehydrogenase	very long chain
Dnah11	1.39083685	1.74651945	1.635963485	0.200880195	0.999827379	NS	dynein axonemal heavy chain 11
G3bp1	0.059206846	7.88976409	0.031503119	0.859122593	0.999827379	NS	Ras GTPase-activating protein-binding protein 1
Atox1	0.402571243	4.27199301	0.811788864	0.3675919	0.999827379	NS	Copper transport protein ATOX1
Sparc	-0.99645349	7.06133505	2.531882943	0.111567012	0.999827379	NS	secreted acidic cysteine rich glycoprotein
Mief2	-0.764469565	2.69743189	1.108598687	0.292386766	0.999827379	NS	Mitochondrial dynamics protein MID49
Dusp14	0.384608155	2.91508129	0.328690492	0.566431193	0.999827379	NS	Dual specificity protein phosphatase 14
Tada2a	-0.747201704	3.47267214	1.605277287	0.205156943	0.999827379	NS	Transcriptional adapter 2-alpha
Pnpo	-0.836225166	4.62763636	3.585647495	0.0582807	0.999827379	NS	Pyridoxine-5'-phosphate oxidase
Cog1	-0.131377024	7.1032475	0.213654032	0.643918363	0.999827379	NS	Conserved oligomeric Golgi complex subunit 1
Cbx1	0.175805707	4.68815998	0.240795556	0.623632112	0.999827379	NS	Chromobox protein homolog 1
Cdk5rap3	0.033833003	7.08904318	0.013687997	0.906863449	0.999827379	NS	CDK5 regulatory subunit-associated protein 3
Copz2	-0.069864086	4.09486163	0.024111133	0.876602474	0.999827379	NS	Coatomer subunit zeta-2
Slc25a39	-0.048743184	7.6980139	0.023322904	0.878620365	0.999827379	NS	Solute carrier family 25 member 39
Sp2	0.013532873	4.29998001	0.001043375	0.974231761	0.999827379	NS	Sp2 transcription factor
Aatf	-0.275076485	4.28362328	0.424830689	0.514536414	0.999827379	NS	apoptosis antagonizing transcription factor
Lhx1	0.362114424	3.24754317	0.279651144	0.596929961	0.999827379	NS	LIM/homeobox protein Lhx1
Dync1h1	0.09289364	6.52626579	0.133525884	0.714803931	0.999827379	NS	Cytoplasmic dynein 1 heavy chain 1
Pex12	0.452302696	4.47348416	1.262811495	0.261119583	0.999827379	NS	Peroxisome assembly protein 12
Ndel1	0.078266432	6.93115465	0.087638227	0.76720141	0.999827379	NS	Nuclear distribution protein nudE-like 1
Slc25a35	0.643624295	3.36587673	1.13758382	0.286163458	0.999827379	NS	Solute carrier family 25 member 35
Zbtb4	0.214511378	3.20367414	0.101227023	0.750362098	0.999827379	NS	zinc finger and BTB domain containing 4
Tnfsfm13	0.556548155	2.02387297	0.358825423	0.54915929	0.999827379	NS	tumor necrosis factor (ligand) superfamily	membrane-bound member 13
Mpdu1	0.127623441	3.69843777	0.061094737	0.804773957	0.999827379	NS	mannose-P-dolichol utilization defect 1
Fxr2	-0.054650268	6.45591515	0.045872244	0.8304082	0.999827379	NS	FMR1 autosomal homolog 2
Atp5g3	0.002176387	7.27161117	5.61E-05	0.994024116	0.999827379	NS	ATP synthase F(0) complex subunit C3	mitochondrial
Acsl1	0.413542921	4.57966429	1.269111879	0.259933357	0.999827379	NS	Long-chain-fatty-acid--CoA ligase 1
Abca5	-0.123311181	6.39713537	0.188303812	0.664332106	0.999827379	NS	ATP-binding cassette	sub-family A (ABC1)	member 5
Smyd4	0.348340037	4.78784629	0.96786981	0.325212017	0.999827379	NS	SET and MYND domain-containing protein 4
Lsp1	0.210614435	2.28112213	0.039892185	0.841691531	0.999827379	NS	Lymphocyte-specific protein 1
Zfyve27	0.030139903	5.81129206	0.012076805	0.91249303	0.999827379	NS	zinc finger	FYVE domain containing 27
Avpi1	-0.030880931	1.67933396	0.000885191	0.976264716	0.999827379	NS	Arginine vasopressin-induced protein 1
Sfrp5	0.849400531	3.87287987	2.241535226	0.134347534	0.999827379	NS	secreted frizzled-related sequence protein 5
Myh11	-0.590219426	4.8963094	0.174944851	0.67575404	0.999827379	NS	myosin heavy chain 11
Rad51d	0.036792737	3.58024594	0.0043656	0.947319958	0.999827379	NS	RAD51 paralog D
Pank3	-0.440968239	5.87632975	2.263323126	0.13246953	0.999827379	NS	pantothenate kinase 3
Rars	-0.045466142	6.04327509	0.031839677	0.858379983	0.999827379	NS	Arginine--tRNA ligase	cytoplasmic
Wwc1	0.435612614	3.9135066	0.617235231	0.432076551	0.999827379	NS	WW	C2 and coiled-coil domain containing 1
Mrpl58	-0.058020488	4.80777445	0.027759334	0.867675882	0.999827379	NS	Mus musculus mitochondrial ribosomal protein L58 (Mrpl58)	transcript variant 2	mRNA.
Fdxr	0.207004615	3.11002517	0.103488962	0.747682248	0.999827379	NS	ferredoxin reductase
Sult4a1	-0.784040373	2.26548483	0.822078545	0.364573148	0.999827379	NS	Sulfotransferase 4A1
Mrpl45	0.120131924	3.75221	0.047262319	0.827897422	0.999827379	NS	39S ribosomal protein L45	mitochondrial
Slc22a5	-1.034888925	3.15292019	2.397126566	0.121558348	0.999827379	NS	solute carrier family 22 (organic cation transporter)	member 5
P4ha2	-0.466761276	4.39858679	0.5533549	0.456950115	0.999827379	NS	Prolyl 4-hydroxylase subunit alpha-2
Cxcl16	0.607283559	3.53390183	1.043513748	0.307005673	0.999827379	NS	C-X-C motif chemokine 16
Pelp1	-0.023695647	3.30384568	0.001512788	0.968974439	0.999827379	NS	Proline-	glutamic acid- and leucine-rich protein 1
Med11	0.232032741	3.61814908	0.184461868	0.667566493	0.999827379	NS	Mediator of RNA polymerase II transcription subunit 11
Ccl6	-1.331819577	0.9264565	0.591684958	0.441768295	0.999827379	NS	C-C motif chemokine 6 CCL6(22-95) CCL6(23-95)
Natd1	0.043774619	4.25731798	0.01051412	0.918329347	0.999827379	NS	Protein NATD1
Map2k3	-0.014144673	5.0100415	0.001512204	0.968980423	0.999827379	NS	mitogen-activated protein kinase kinase 3
Ywhah	0.20913529	7.96042928	0.376437248	0.539516156	0.999827379	NS	tyrosine 3-monooxygenase/tryptophan 5-monooxygenase activation protein	eta polypeptide
Sart3	0.07267948	5.93668427	0.07283947	0.787246508	0.999827379	NS	Mus musculus squamous cell carcinoma antigen recognized by T cells 3 (Sart3)	transcript variant 3
E2f2	-0.223823427	2.35887296	0.062032559	0.803311768	0.999827379	NS	Transcription factor E2F2
Nars2	-0.118675866	4.4579272	0.08471012	0.771013056	0.999827379	NS	Probable asparagine--tRNA ligase	mitochondrial
Slc35b4	0.313265751	7.17044421	1.089339012	0.296617709	0.999827379	NS	UDP-xylose and UDP-N-acetylglucosamine transporter
Dalrd3	-0.110926806	4.73759524	0.095290947	0.757555588	0.999827379	NS	DALR anticodon-binding domain-containing protein 3
Fis1	-0.094272119	5.98616507	0.125242346	0.723416859	0.999827379	NS	Mitochondrial fission 1 protein
Plod1	0.301173869	4.94153522	0.695531373	0.404289304	0.999827379	NS	Procollagen-lysine	2-oxoglutarate 5-dioxygenase 1
Rab3d	-0.22514887	7.99438525	0.39816536	0.528038265	0.999827379	NS	RAB3D	member RAS oncogene family
Mfsd3	0.51552817	2.16507329	0.288947262	0.590895941	0.999827379	NS	major facilitator superfamily domain containing 3
Slc25a22	0.073048559	5.68632266	0.058295334	0.809210807	0.999827379	NS	solute carrier family 25 (mitochondrial carrier	glutamate)	member 22
Atp6ap1	0.004406225	8.27133122	0.000131078	0.990865267	0.999827379	NS	ATPase	H+ transporting	lysosomal accessory protein 1
Dnase1l1	-0.262552786	0.77459567	0.039018959	0.843411107	0.999827379	NS	Deoxyribonuclease-1-like 1
Scrn1	-0.347986862	7.04848093	1.51768449	0.217970236	0.999827379	NS	Secernin-1
BC005537	0.544848783	4.55558624	1.894017028	0.168749536	0.999827379	NS	Uncharacterized
Isyna1	-0.326685191	5.32929281	1.208410301	0.271647186	0.999827379	NS	Inositol-3-phosphate synthase 1
Hars2	-0.405005971	4.53054571	1.076503256	0.299481121	0.999827379	NS	Probable histidine--tRNA ligase	mitochondrial
Tmem160	-0.178679289	3.54394195	0.105629526	0.745175802	0.999827379	NS	Transmembrane protein 160
Rab5c	-0.160746545	3.14844658	0.06111199	0.80474695	0.999827379	NS	RAB5C	member RAS oncogene family
Mdh2	-0.012267608	8.10819908	0.00118279	0.972564795	0.999827379	NS	Malate dehydrogenase	mitochondrial
H13	-0.292293581	7.28124848	0.996328666	0.318200497	0.999827379	NS	Minor histocompatibility antigen H13
Rnf145	0.005901311	7.95366091	0.000298644	0.986212198	0.999827379	NS	ring finger protein 145
Scn1b	-0.072697457	2.5668831	0.009191709	0.923621118	0.999827379	NS	Sodium channel subunit beta-1
Atp6v1e1	-0.027793382	8.33699068	0.004857409	0.944436333	0.999827379	NS	ATPase	H+ transporting	lysosomal V1 subunit E1
Chtf18	1.388055814	2.79177559	3.077565005	0.079379286	0.999827379	NS	chromosome transmission fidelity factor 18
Rps6kl1	0.162500489	3.57663475	0.086843484	0.768229034	0.999827379	NS	ribosomal protein S6 kinase-like 1
Ppp1r12c	-0.021757124	5.3423296	0.005053148	0.94332971	0.999827379	NS	Protein phosphatase 1 regulatory subunit 12C
Ahr	0.163389232	3.24411506	0.062079508	0.803238879	0.999827379	NS	aryl hydrocarbon receptor isoform 2
Map1s	-0.323534873	5.44647666	1.207971982	0.271734138	0.999827379	NS	Microtubule-associated protein 1S MAP1S heavy chain MAP1S light chain
Dpep1	0.204520384	-0.81707109	0.006577339	0.935361792	0.999827379	NS	Dipeptidase 1
Tmem129	-0.059898347	5.27571722	0.034436407	0.852781597	0.999827379	NS	E3 ubiquitin-protein ligase TM129
Nop9	0.267021389	4.92163705	0.604725194	0.436780809	0.999827379	NS	Nucleolar protein 9
Atp6v0a1	-0.18658087	7.40551613	0.360071984	0.54846626	0.999827379	NS	ATPase	H+ transporting	lysosomal V0 subunit A1
Psmc3ip	0.460815086	1.93175277	0.16805568	0.681845599	0.999827379	NS	proteasome (prosome	macropain) 26S subunit	ATPase 3	interacting protein
Grb7	-0.098859475	5.61778834	0.135121683	0.713179708	0.999827379	NS	Growth factor receptor-bound protein 7
Noxo1	-0.791273842	2.87686427	1.352443523	0.244851391	0.999827379	NS	NADPH oxidase organizer 1
Aoc3	-0.441613533	1.35347483	0.07311311	0.786856879	0.999827379	NS	Membrane primary amine oxidase
Zfp687	-0.219371709	5.92330928	0.574870082	0.448330139	0.999827379	NS	zinc finger protein 687
D8Ertd738e	-0.150468722	4.82736162	0.182525476	0.66921181	0.999827379	NS	Leydig cell tumor 10 kDa protein homolog
Sec14l4	-0.45051005	2.46135291	0.313602799	0.575477733	0.999827379	NS	SEC14-like protein 4
Calm3	0.202855447	6.67298732	0.556881714	0.455519383	0.999827379	NS	Calmodulin-1
Cops3	-0.113565559	7.04249187	0.165953204	0.683733655	0.999827379	NS	COP9 signalosome complex subunit 3
Fkbp8	-0.021624733	6.81799744	0.006861279	0.933984459	0.999827379	NS	Peptidyl-prolyl cis-trans isomerase FKBP8
Ffar3	0.098635876	1.81915509	0.009589097	0.921992692	0.999827379	NS	Free fatty acid receptor 3
Ddx39b	0.148468671	6.66455213	0.345967441	0.556404789	0.999827379	NS	Spliceosome RNA helicase Ddx39b
Gipc1	0.029737191	5.015216	0.007740888	0.929890732	0.999827379	NS	PDZ domain-containing protein GIPC1
Tlcd1	-0.234111931	2.84813636	0.101039258	0.750586031	0.999827379	NS	Calfacilitin
Plscr3	0.172359032	5.08965963	0.288132409	0.591419819	0.999827379	NS	Phospholipid scramblase 3
Ptger1	0.900777025	1.12533817	0.570510018	0.45005632	0.999827379	NS	Prostaglandin E2 receptor EP1 subtype
Arhgef25	0.23632165	1.77479344	0.045674093	0.830769328	0.999827379	NS	Mus musculus Rho guanine nucleotide exchange factor (GEF) 25 (Arhgef25)	transcript variant 3	mRNA.
Xab2	0.035444417	5.99985869	0.01910346	0.890070288	0.999827379	NS	XPA binding protein 2
Cdc37	0.084280604	6.63295185	0.115853002	0.733576509	0.999827379	NS	Hsp90 co-chaperone Cdc37 Hsp90 co-chaperone Cdc37	N-terminally processed
Rab4a	0.105936262	5.30668405	0.119813804	0.729236522	0.999827379	NS	Ras-related protein Rab-4A
Trip10	0.860497892	1.72442132	0.665258777	0.414709513	0.999827379	NS	thyroid hormone receptor interactor 10
Cops6	0.071195057	5.96978456	0.072047145	0.788379131	0.999827379	NS	COP9 signalosome complex subunit 6
Ubb	0.151936928	11.60299923	0.024115481	0.876591437	0.999827379	NS	ubiquitin B
Ap4m1	-1.435748808	2.21008534	2.591955084	0.107407682	0.999827379	NS	AP-4 complex subunit mu-1
Gyg	-0.393033618	4.93542319	1.24202713	0.265080734	0.999827379	NS	glycogenin
Rcn3	-0.306489112	3.90552279	0.201592905	0.653438159	0.999827379	NS	Mus musculus reticulocalbin 3	EF-hand calcium binding domain (Rcn3)	transcript variant 2	mRNA.
Slc6a8	0.02972598	0.99897591	0.000572707	0.980907413	0.999827379	NS	solute carrier family 6 (neurotransmitter transporter	creatine)	member 8
Arid3a	0.226604293	3.77777007	0.202979629	0.652326449	0.999827379	NS	AT-rich interactive domain-containing protein 3A
Ubxn6	0.057212262	5.87716355	0.042463856	0.836738107	0.999827379	NS	UBX domain protein 6
Mydgf	-0.29167178	6.1926079	1.150080487	0.283532302	0.999827379	NS	Myeloid-derived growth factor
Cyb561	0.07061458	6.76237275	0.069167407	0.792552914	0.999827379	NS	Cytochrome b561
Sema6a	0.972026118	1.31663048	0.724821592	0.39456688	0.999827379	NS	Semaphorin-6A
Ccdc12	-0.190514344	5.41963987	0.442577506	0.505881019	0.999827379	NS	Coiled-coil domain-containing protein 12
Fmc1	0.086030618	2.94997809	0.016751856	0.897018231	0.999827379	NS	formation of mitochondrial complex V assembly factor 1 homolog
Akt3	0.063093813	4.94391901	0.031716643	0.858650983	0.999827379	NS	RAC-gamma serine/threonine-protein kinase
Mrpl24	-0.146571205	4.72926587	0.150206388	0.698338204	0.999827379	NS	39S ribosomal protein L24	mitochondrial
Gle1	0.360073361	5.55834437	1.685050534	0.194254705	0.999827379	NS	Nucleoporin GLE1
L3hypdh	-1.351084335	0.53805194	0.558275414	0.45495594	0.999827379	NS	Trans-L-3-hydroxyproline dehydratase
Lyst	-0.26984748	3.73748659	0.237193908	0.626240209	0.999827379	NS	lysosomal trafficking regulator
Slc35e1	-0.211201074	6.75143975	0.698820132	0.403180431	0.999827379	NS	Solute carrier family 35 member E1
Tmc4	-0.011420408	6.40275224	0.002055939	0.963834344	0.999827379	NS	transmembrane channel like 4
Syne4	-0.032541252	4.62641833	0.0070229	0.933213268	0.999827379	NS	Nesprin-4
Polr2i	0.436663765	3.83145997	0.815707616	0.366438155	0.999827379	NS	DNA-directed RNA polymerase II subunit RPB9
Krt10	0.049336145	3.24257364	0.006431001	0.936083344	0.999827379	NS	keratin 10
Iyd	-1.644655276	0.54464096	1.238706811	0.265720429	0.999827379	NS	Iodotyrosine deiodinase 1
Rmnd1	0.068642996	4.01902945	0.022607738	0.880481625	0.999827379	NS	Required for meiotic nuclear division
Fbxo5	-0.02363553	2.55092567	0.000856165	0.976656997	0.999827379	NS	F-box only protein 5
Mtrf1l	0.206121289	3.60428863	0.143362101	0.704961244	0.999827379	NS	Peptide chain release factor 1-like	mitochondrial
Rgs17	0.430767793	3.77941304	0.700125702	0.40274146	0.999827379	NS	regulator of G-protein signaling 17
Hdac2	-0.020166851	7.33953545	0.004515429	0.946424917	0.999827379	NS	histone deacetylase 2
Frk	-0.585609522	4.48704858	2.318756067	0.127822208	0.999827379	NS	Mus musculus fyn-related kinase (Frk)	transcript variant 3	mRNA.
Rwdd1	-0.048804662	6.34933362	0.030632004	0.861063911	0.999827379	NS	RWD domain-containing protein 1
Stxbp5	0.000765554	5.53668348	5.63E-06	0.998107552	0.999827379	NS	Syntaxin-binding protein 5
Hint3	0.162052829	3.75962832	0.096032225	0.756644101	0.999827379	NS	Histidine triad nucleotide-binding protein 3
Trmt11	0.086715078	4.11930499	0.035865351	0.849793826	0.999827379	NS	tRNA methyltransferase 11
Katna1	0.021877319	5.77062546	0.00637378	0.936367725	0.999827379	NS	katanin catalytic subunit A1
Pcmt1	0.141758554	7.01015242	0.250837141	0.616486237	0.999827379	NS	protein-L-isoaspartate (D-aspartate) O-methyltransferase 1
Lrp11	-0.022523933	8.93258269	0.001948715	0.964789419	0.999827379	NS	Low-density lipoprotein receptor-related protein 11
1700021F05Rik	-0.138755756	3.36872359	0.057391235	0.810667749	0.999827379	NS	RIKEN cDNA 1700021F05 gene
Sec63	-0.242645841	6.9992118	0.744719387	0.388153271	0.999827379	NS	Mus musculus SEC63-like (S. cerevisiae) (Sec63)	transcript variant 2	mRNA.
Snx3	0.040027415	6.93768379	0.022856389	0.879831127	0.999827379	NS	sorting nexin 3
Aig1	-0.322448365	6.02004799	1.519278316	0.217728738	0.999827379	NS	Mus musculus androgen-induced 1 (Aig1)	transcript variant 2	mRNA.
Pex3	0.195498236	5.66066838	0.518794221	0.471356487	0.999827379	NS	Peroxisomal biosis factor 3
Fuca2	-0.445237931	5.43898021	2.416669451	0.120049926	0.999827379	NS	Mus musculus fucosidase	alpha-L- 2	plasma (Fuca2)	transcript variant 2	mRNA.
Cep57l1	0.729042046	2.72472001	0.997014798	0.318033919	0.999827379	NS	centrosomal protein CEP57L1 isoform 3
Ltv1	-0.075429216	5.49277137	0.072832269	0.787256773	0.999827379	NS
Plagl1	-0.744535765	3.49631727	1.772315332	0.183095798	0.999827379	NS
Cd164	-0.016884486	10.32109471	0.000518611	0.981831313	0.999827379	NS	Sialomucin core protein 24
Utrn	-0.251351879	5.47609247	0.764831774	0.381820648	0.999827379	NS	utrophin
Smpd2	-0.284497987	5.10587142	0.741367586	0.389223143	0.999827379	NS	sphingomyelin phosphodiesterase 2	neutral
Mical1	-0.983678938	0.90971794	0.587161282	0.443518937	0.999827379	NS	Mus musculus microtubule associated monooxygenase	calponin and LIM domain containing 1 (Mical1)	tr
Zbtb24	0.06496656	5.48878134	0.049464586	0.823997567	0.999827379	NS	zinc finger and BTB domain containing 24
Grm1	-0.2845013	1.11996787	0.054639447	0.81517843	0.999827379	NS	Metabotropic glutamate receptor 1
Wasf1	0.26027707	2.62914749	0.111539909	0.738397736	0.999827379	NS	WAS protein family	member 1
Rab32	-0.289637002	0.6626929	0.025882169	0.872188417	0.999827379	NS	RAB32	member RAS oncogene family
Gtf3c6	0.313448541	4.39729448	0.530773922	0.466281668	0.999827379	NS	ral transcription factor 3C polypeptide 6
Slc16a10	0.156557918	5.57118368	0.218597067	0.640110968	0.999827379	NS	solute carrier family 16 (monocarboxylic acid transporters)	member 10
Rev3l	-0.271680552	5.54313044	0.971138319	0.324396449	0.999827379	NS	DNA polymerase zeta catalytic subunit
Traf3ip2	0.137516151	4.26942468	0.102841978	0.748445442	0.999827379	NS	TRAF3 interacting protein 2
Fyn	-0.443579531	4.2132868	0.951673258	0.329293749	0.999827379	NS	Tyrosine-protein kinase Fyn
Tube1	0.99718524	1.42818084	0.669813034	0.4131168	0.999827379	NS	epsilon-tubulin 1
Prep	-0.133507277	6.61038824	0.283284547	0.594556445	0.999827379	NS	prolyl endopeptidase
Perp	0.038281764	4.53138686	0.009702279	0.921535154	0.999827379	NS	p53 apoptosis effector related to PMP-22
Arfgef3	-0.399494814	6.71388487	2.040353919	0.153174004	0.999827379	NS	Brefeldin A-inhibited guanine nucleotide-exchange protein 3
Reps1	0.3269293	6.59971321	1.486032995	0.222832985	0.999827379	NS	RalBP1-associated Eps domain-containing protein 1
Fam184a	0.579264777	3.633563	1.145621255	0.284467654	0.999827379	NS	family with sequence similarity 184 member A
Asf1a	0.118898978	4.54006419	0.100257665	0.751520645	0.999827379	NS	Histone chaperone ASF1A
Gopc	-0.037348202	5.97598218	0.014280536	0.904878291	0.999827379	NS	golgi associated PDZ and coiled-coil motif containing
Qrsl1	-0.075991648	3.3132088	0.010751992	0.917413925	0.999827379	NS	glutaminyl-tRNA synthase (glutamine-hydrolyzing)-like 1
Rtn4ip1	0.039704407	4.89831811	0.009207055	0.923557583	0.999827379	NS	reticulon 4 interacting protein 1
Vta1	0.257596999	5.60670532	0.963005419	0.326430824	0.999827379	NS	vesicle (multivesicular body) trafficking 1
Smpdl3a	0.285877083	5.03812353	0.685266299	0.40777917	0.999827379	NS	sphingomyelin phosphodiesterase	acid-like 3A
Reep3	-0.237113963	5.15908083	0.52626625	0.468180849	0.999827379	NS	Receptor expression-enhancing protein 3
Pkib	0.061737493	5.02301888	0.033302408	0.855198614	0.999827379	NS	cAMP-dependent protein kinase inhibitor beta
Serinc1	-0.124207769	8.87425732	0.062111527	0.803189185	0.999827379	NS	Serine incorporator 1
Hsf2	0.518574436	2.61581774	0.476765562	0.489891048	0.999827379	NS	Heat shock factor protein 2
Echdc1	0.060405512	5.60862125	0.053419045	0.817217224	0.999827379	NS	Ethylmalonyl-CoA decarboxylase
Ptprk	0.403050214	4.59813006	0.925080492	0.336144527	0.999827379	NS	protein tyrosine phosphatase	receptor type	K
Dcbld1	0.493483088	4.20759855	1.225880544	0.268209673	0.999827379	NS	Mus musculus discoidin	CUB and LCCL domain containing 1 (Dcbld1)	transcript variant 2	mRNA.
Slc6a15	-1.746456299	0.44568968	0.906548016	0.341031994	0.999827379	NS	Sodium-dependent neutral amino acid transporter B(0)AT2
Ccdc59	0.207344034	5.08331589	0.412867235	0.520517786	0.999827379	NS	Thyroid transcription factor 1-associated protein 26
Lama2	0.048678689	2.2930327	0.001085166	0.973720951	0.999827379	NS	Laminin subunit alpha-2
Rfx6	0.22414096	7.47684323	0.520733174	0.470529098	0.999827379	NS	DNA-binding protein RFX6
Gprc6a	-0.633295303	2.0152011	0.456259524	0.499377298	0.999827379	NS	G protein-coupled receptor	family C	group 6	member A
Ppp1r12a	0.241508919	4.93175293	0.49636047	0.48110368	0.999827379	NS	protein phosphatase 1	regulatory (inhibitor) subunit 12A
Sim1	-0.26394499	2.93729829	0.158800678	0.690263112	0.999827379	NS	Single-minded homolog 1
P4ha1	-0.082688578	5.53602216	0.058440448	0.808978074	0.999827379	NS	Prolyl 4-hydroxylase subunit alpha-1
10-Sep	0.223193266	3.90880838	0.181977476	0.669679308	0.999827379	NS	septin 10
Lims1	0.045972951	5.44647539	0.025972823	0.871966708	0.999827379	NS	Mus musculus LIM and senescent cell antigen-like domains 1 (Lims1)	transcript variant 6	mRNA.
Zwint	0.035345516	7.16435026	0.016216161	0.898669174	0.999827379	NS	ZW10 interactor
Ube2d1	0.165219862	4.16028691	0.139922533	0.708358037	0.999827379	NS	ubiquitin-conjugating enzyme E2D 1
Dcn	-1.347797274	5.42973003	1.585215911	0.20801098	0.999827379	NS	Decorin
Mrln	-0.278864615	5.24042711	0.60861651	0.435309194	0.999827379	NS	Myoregulin
Cdk1	-1.188672027	2.64475705	2.273767397	0.131579699	0.999827379	NS	Cyclin-dependent kinase 1
Atp2b1	-0.047721652	8.03193839	0.018607362	0.891498115	0.999827379	NS	Plasma membrane calcium-transporting ATPase 1
Rhobtb1	0.081607723	5.61118535	0.091415948	0.76238473	0.999827379	NS	Rho-related BTB domain-containing protein 1
Cabcoco1	0.143981763	1.49602637	0.016023666	0.899269172	0.999827379	NS	Ciliary-associated calcium-binding coiled-coil protein 1
Arid5b	0.357481576	3.72483024	0.480271949	0.488299161	0.999827379	NS	AT-rich interactive domain-containing protein 5B
Actr6	0.232200908	3.54326187	0.172885359	0.677560126	0.999827379	NS	ARP6 actin related protein 6 homolog
Uhrf1bp1l	-0.187424137	5.59052374	0.496639092	0.48098061	0.999827379	NS	UHRF1 (ICBP90) binding protein 1-like
Poc1b	0.012631557	5.10183041	0.00131028	0.971124646	0.999827379	NS	POC1 centriolar protein B
Tmpo	-0.025910102	7.82786863	0.005998537	0.938265389	0.999827379	NS	thymopoietin
Psen1	-0.034025314	6.50868587	0.017665272	0.894263951	0.999827379	NS	presenilin 1
Sgk1	0.346515424	4.45758537	0.59992276	0.438607498	0.999827379	NS	Serine/threonine-protein kinase Sgk1
[truncated: 11,810 more rows]
[truncated: 1 more columns]
