# Supplementary material for: Reduced synchroneity of intra-islet Ca2+ oscillations in vivo in Robo-deficient β cells
Source: eLife. 2021 Jul 7;10:e61308. doi: 10.7554/eLife.61308 (PMC8289414; doi:10.7554/eLife.61308)
Supplement: Supplementary file 2. [file elife-61308-supp2.xlsx]

## Sheet: Sheet1
Mouse ID	Slow Oscillation Period (mins)	Fast Oscillation Period (sec)	Pattern	Imaging Speed
Control 1	~1.1	~5	mixed	~1Hz
Control 1	~1.0	~4	fast with transition to mixed	~1Hz
Control 2	~2.7	~14	mixed	~1Hz
Control 3	~8.6	none	slow	~.2Hz
Control 3	~10.3	none	slow	~.2Hz
Control 4	~4.3	~20	mixed	~.2Hz
Control 4	~5.6	none	slow	~.2Hz
Control 5	~2.1	none	mixed	~.1Hz
Control 5	~3.0	~32	mixed	~.1Hz
Control 5	~1.8	~26	mixed	~.1Hz
Control 6	~1.7	~45	mixed	~.1Hz
Control 7	none	~31	fast	~.1Hz
Control 7	~6	~32	mixed	~.1Hz
